# Supplementary material for: The theory of massively repeated evolution and full identifications of cancer-driving nucleotides (CDNs)
Source: eLife. 2024 Dec 17;13:RP99340. doi: 10.7554/eLife.99340 (PMC11651657; doi:10.7554/eLife.99340)
Supplement: Supplementary file 1. — ‘CDN_sites.i ≥ 20’ presents CDN sites with total hits ≥20 in each cancer type. ‘CDN.Missense.thres_3’ provides all CDN sites analyzed in this study, ranked in decreasing order based on the highest recurrence across 12 cancer types. ‘CDN.Missense.gnomAD’ presents the gnomAD population allele frequency of all missense CDNs. ‘Synonymous_high_hits’ lists the synonymous mutations potentially under selection, while ‘Synonymous_high_hits.gnomAD’ provides their corresponding allele frequency annotations from gnomAD. [file elife-99340-supp1.xlsx]

## Sheet: CDN sites with i>=20
cancer type	gene ID	chr	pos	hits	impact	Amino Acid Change	nucleotide Change	codon substitution	local context	CpG site flag	sample size
breast	PIK3CA	3	178952085	129	Missense	H1047R: 116, H1047L: 13	A3140G: 116, A3140T: 13	CAT>CGT: 116, CAT>CTT: 13	CAT	No	963
breast	PIK3CA	3	178936091	65	Missense	E545K: 65	G1633A: 65	GAG>AAG: 65	TGA	No	963
breast	PIK3CA	3	178936082	41	Missense	E542K: 41	G1624A: 41	GAA>AAA: 41	TGA	No	963
breast	AKT1	14	105246551	24	Missense	E17K: 24	G49A: 24	GAG>AAG: 24	GGA	No	963
large_intestine	KRAS	12	25398284	132	Missense	G12D: 65, G12V: 56, G12A: 11	G35A: 65, G35T: 56, G35C: 11	GGT>GAT: 65, GGT>GTT: 56, GGT>GCT: 11	GGT	No	571
large_intestine	BRAF	7	140453136	50	Missense	V600E: 50	T1799A: 50	GTG>GAG: 50	GTG	No	571
large_intestine	PIK3CA	3	178936091	39	Missense	E545K: 38, E545Q: 1	G1633A: 38, G1633C: 1	GAG>AAG: 38, GAG>CAG: 1	TGA	No	571
large_intestine	KRAS	12	25398281	39	Missense	G13D: 39	G38A: 39	GGC>GAC: 39	GGC	No	571
large_intestine	TP53	17	7578406	39	Missense	R175H: 39	G524A: 39	CGC>CAC: 39	CGC	Yes	571
large_intestine	KRAS	12	25398285	30	Missense	G12C: 17, G12S: 11, G12R: 2	G34T: 17, G34A: 11, G34C: 2	GGT>TGT: 17, GGT>AGT: 11, GGT>CGT: 2	TGG	No	571
large_intestine	PIK3CA	3	178952085	21	Missense	H1047R: 20, H1047L: 1	A3140G: 20, A3140T: 1	CAT>CGT: 20, CAT>CTT: 1	CAT	No	571
large_intestine	TP53	17	7577094	20	Missense	R282W: 20	C844T: 20	CGG>TGG: 20	CCG	Yes	571
upper_aerodigestive_tract	PIK3CA	3	178936091	29	Missense	E545K: 29	G1633A: 29	GAG>AAG: 29	TGA	No	688
upper_aerodigestive_tract	CDKN2A.p14arf	9	21971120	22	Missense	P94L: 22	C281T: 22	CCG>CTG: 22	CCG	Yes	688
upper_aerodigestive_tract	TP53	17	7578406	21	Missense	R175H: 21	G524A: 21	CGC>CAC: 21	CGC	Yes	688
endometrium	KRAS	12	25398284	57	Missense	G12D: 31, G12V: 19, G12A: 7	G35A: 31, G35T: 19, G35C: 7	GGT>GAT: 31, GGT>GTT: 19, GGT>GCT: 7	GGT	No	465
endometrium	PTEN	10	89692904	40	Missense	R130G: 40	C388G: 40	CGA>GGA: 40	ACG	Yes	465
endometrium	PIK3CA	3	178952085	35	Missense	H1047R: 27, H1047L: 8	A3140G: 27, A3140T: 8	CAT>CGT: 27, CAT>CTT: 8	CAT	No	465
endometrium	CTNNB1	3	41266101	24	Missense	S33F: 9, S33C: 9, S33Y: 6	C98T: 9, C98G: 9, C98A: 6	TCT>TTT: 9, TCT>TGT: 9, TCT>TAT: 6	TCT	No	465
endometrium	FGFR2	10	123279677	23	Missense	S252W: 23	C755G: 23	TCG>TGG: 23	TCG	Yes	465
endometrium	PPP2R1A	19	52715971	20	Missense	P179R: 19, P179L: 1	C536G: 19, C536T: 1	CCC>CGC: 19, CCC>CTC: 1	CCC	No	465
endometrium	PTEN	10	89692905	20	Missense	R130Q: 15, R130L: 3, R130P: 2	G389A: 15, G389T: 3, G389C: 2	CGA>CAA: 15, CGA>CTA: 3, CGA>CCA: 2	CGA	Yes	465
endometrium	PIK3CA	3	178916876	20	Missense	R88Q: 20	G263A: 20	CGA>CAA: 20	CGA	Yes	465
urinary_tract	PIK3CA	3	178936091	30	Missense	E545K: 27, E545Q: 3	G1633A: 27, G1633C: 3	GAG>AAG: 27, GAG>CAG: 3	TGA	No	404
urinary_tract	FGFR3	4	1803568	29	Missense	S249C: 29	C746G: 29	TCC>TGC: 29	TCC	No	404
urinary_tract	ERBB2	17	37868208	22	Missense	S310F: 19, S310Y: 3	C929T: 19, C929A: 3	TCC>TTC: 19, TCC>TAC: 3	TCC	No	404
lung	KRAS	12	25398284	76	Missense	G12V: 40, G12A: 18, G12D: 18	G35T: 40, G35C: 18, G35A: 18	GGT>GTT: 40, GGT>GCT: 18, GGT>GAT: 18	GGT	No	1035
lung	KRAS	12	25398285	62	Missense	G12C: 57, G12S: 5	G34T: 57, G34A: 5	GGT>TGT: 57, GGT>AGT: 5	TGG	No	1035
lung	EGFR	7	55259515	23	Missense	L858R: 23	T2573G: 23	CTG>CGG: 23	CTG	No	1035
lung	TP53	17	7577120	22	Missense	R273L: 15, R273H: 4, R273P: 3	G818T: 15, G818A: 4, G818C: 3	CGT>CTT: 15, CGT>CAT: 4, CGT>CCT: 3	CGT	Yes	1035
lung	TP53	17	7578457	22	Missense	R158L: 20, R158H: 1, R158P: 1	G473T: 20, G473A: 1, G473C: 1	CGC>CTC: 20, CGC>CAC: 1, CGC>CCC: 1	CGC	Yes	1035
lung	PIK3CA	3	178936091	21	Missense	E545K: 19, E545Q: 2	G1633A: 19, G1633C: 2	GAG>AAG: 19, GAG>CAG: 2	TGA	No	1035
central_nervous_system	IDH1	2	209113112	378	Missense	R132H: 378	G395A: 378	CGT>CAT: 378	CGT	Yes	873
central_nervous_system	TP53	17	7577121	50	Missense	R273C: 50	C817T: 50	CGT>TGT: 50	GCG	Yes	873
central_nervous_system	IDH1	2	209113113	39	Missense	R132C: 18, R132G: 12, R132S: 9	C394T: 18, C394G: 12, C394A: 9	CGT>TGT: 18, CGT>GGT: 12, CGT>AGT: 9	TCG	Yes	873
central_nervous_system	EGFR	7	55221822	24	Missense	A289V: 19, A289D: 5	C866T: 19, C866A: 5	GCC>GTC: 19, GCC>GAC: 5	GCC	No	873

## Sheet: CDN.Missens.thres_3
gene	chr	pos	strand	impact	coding position	amino acid position	CDN hits in TCGA	CDN cancer types	coding context (15bp)	is CpG site
IDH1	2	209113112	-1	Missense	G395	R132	378	central_nervous_system	ATAGGTCGTCATGCT	Yes
KRAS	12	25398284	-1	Missense	G35	G12	132,76,57,13,8,5,4,3	large_intestine,lung,endometrium,stomach,urinary_tract,kidney,breast,ovary	GGAGCTGGTGGCGTA	No
PIK3CA	3	178952085	1	Missense	A3140	H1047	129,35,21,17,14,9,7,7,5	breast,endometrium,large_intestine,upper_aerodigestive_tract,stomach,lung,central_nervous_system,urinary_tract,liver	GATGCACATCATGGT	No
PIK3CA	3	178936091	1	Missense	G1633	E545	65,39,30,29,21,16,10,4	breast,large_intestine,urinary_tract,upper_aerodigestive_tract,lung,endometrium,stomach,central_nervous_system	AATCACTGAGCAGGA	No
KRAS	12	25398285	-1	Missense	G34	G12	62,30,7,4,3	lung,large_intestine,endometrium,stomach,urinary_tract	TGGAGCTGGTGGCGT	No
TP53	17	7577121	-1	Missense	C817	R273	50,13,10,9,7,7,5,5,4	central_nervous_system,large_intestine,endometrium,upper_aerodigestive_tract,stomach,urinary_tract,ovary,lung,breast	TGAGGTGCGTGTTTG	Yes
BRAF	7	140453136	-1	Missense	T1799	V600	50,8,5	large_intestine,lung,central_nervous_system	GCTACAGTGAAATCT	No
PIK3CA	3	178936082	1	Missense	G1624	E542	41,19,18,18,15,13,6,3,3,3	breast,upper_aerodigestive_tract,endometrium,urinary_tract,lung,large_intestine,stomach,central_nervous_system,prostate,kidney	TCTCTCTGAAATCAC	No
PTEN	10	89692904	1	Missense	C388	R130	40	endometrium	AAAGGGACGAACTGG	Yes
TP53	17	7578406	-1	Missense	G524	R175	39,21,19,16,15,11,6,5,3	large_intestine,upper_aerodigestive_tract,breast,central_nervous_system,ovary,stomach,lung,endometrium,urinary_tract	GTGAGGCGCTGCCCC	Yes
KRAS	12	25398281	-1	Missense	G38	G13	39,11,9	large_intestine,stomach,endometrium	GCTGGTGGCGTAGGC	No
IDH1	2	209113113	-1	Missense	C394	R132	39,3,3	central_nervous_system,liver,prostate	CATAGGTCGTCATGC	Yes
FGFR3	4	1803568	1	Missense	C746	S249	29,4,3	urinary_tract,upper_aerodigestive_tract,lung	GAGCGCTCCCCGCAC	No
CTNNB1	3	41266101	1	Missense	C98	S33	24,11	endometrium,liver	CTGGACTCTGGAATC	No
AKT1	14	105246551	-1	Missense	G49	E17	24,8,4	breast,endometrium,large_intestine	TGTAGGGGAGTACAT	No
EGFR	7	55221822	1	Missense	C866	A289	24	central_nervous_system	TTTGGTGCCACCTGC	No
FGFR2	10	123279677	-1	Missense	C755	S252	23	endometrium	GAGCGATCGCCTCAC	Yes
EGFR	7	55259515	1	Missense	T2573	L858	23	lung	TTTGGGCTGGCCAAA	No
TP53	17	7577120	-1	Missense	G818	R273	22,18,17,16,13,12,12,6	lung,large_intestine,central_nervous_system,breast,upper_aerodigestive_tract,ovary,endometrium,stomach	GAGGTGCGTGTTTGT	Yes
CDKN2A.p14arf	9	21971120	-1	Missense	C281	P94	22,3	upper_aerodigestive_tract,urinary_tract	TCTCACCCGACCCGT	Yes
TP53	17	7578457	-1	Missense	G473	R158	22,5,5,3,3	lung,upper_aerodigestive_tract,central_nervous_system,large_intestine,urinary_tract	CGCGTCCGCGCCATG	Yes
ERBB2	17	37868208	1	Missense	C929	S310	22,4,3	urinary_tract,stomach,upper_aerodigestive_tract	GTGGGATCCTGCACC	No
TP53	17	7577094	-1	Missense	C844	R282	20,13,11,6,6,5,5,3	large_intestine,upper_aerodigestive_tract,central_nervous_system,stomach,lung,endometrium,breast,ovary	GAGAGACCGGCGCAC	Yes
PPP2R1A	19	52715971	1	Missense	C536	P179	20	endometrium	GACACCCCCATGGTG	No
PTEN	10	89692905	1	Missense	G389	R130	20,3	endometrium,breast	AAGGGACGAACTGGT	Yes
PIK3CA	3	178916876	1	Missense	G263	R88	20,9,5,3	endometrium,large_intestine,stomach,central_nervous_system	ACAAGACGACTTTGT	Yes
CTNNB1	3	41266113	1	Missense	C110	S37	19,6,5,4,3	endometrium,lung,liver,stomach,urinary_tract	ATCCATTCTGGTGCC	No
TP53	17	7577538	-1	Missense	G743	R248	18,17,17,16,10,10,9,5,4,3	urinary_tract,upper_aerodigestive_tract,large_intestine,central_nervous_system,ovary,endometrium,lung,stomach,prostate,liver	ATGAACCGGAGGCCC	Yes
TP53	17	7578461	-1	Missense	G469	V157	18,6,4,3	lung,upper_aerodigestive_tract,ovary,liver	CACCCGCGTCCGCGC	Yes
EGFR	7	55233043	1	Missense	G1793	G598	18	central_nervous_system	CCGGCAGGAGTCATG	No
PIK3CA	3	178921553	1	Missense	T1035	N345	17,4,4	breast,endometrium,stomach	ACGTGAATGTAAATA	No
KRAS	12	25378562	-1	Missense	G436	A146	16	large_intestine	AACATCAGCAAAGAC	No
TP53	17	7578190	-1	Missense	A659	Y220	15,10,9,8,7,7,4	central_nervous_system,upper_aerodigestive_tract,breast,ovary,endometrium,lung,stomach	GTGCCCTATGAGCCG	No
IDH2	15	90631838	-1	Missense	G515	R172	15	central_nervous_system	ATTGGCAGGCACGCC	No
TP53	17	7577099	-1	Missense	G839	R280	15,6,3	urinary_tract,lung,breast	CCTGGGAGAGACCGG	No
TP53	17	7577539	-1	Missense	C742	R248	14,14,10,9,7,6,5,4,4	upper_aerodigestive_tract,large_intestine,central_nervous_system,ovary,endometrium,breast,urinary_tract,stomach,lung	CATGAACCGGAGGCC	Yes
PCBP1	2	70315174	1	Missense	T299	L100	13	large_intestine	GTCACCCTGAGGCTG	No
RXRA	9	137328351	1	Missense	C1280	S427	13	urinary_tract	CTGCGCTCCATCGGG	No
TP53	17	7577548	-1	Missense	G733	G245	12,11,7,7,3,3	lung,upper_aerodigestive_tract,large_intestine,central_nervous_system,ovary,prostate	CATGGGCGGCATGAA	Yes
NFE2L2	2	178098960	-1	Missense	G85	D29	12,5,3	lung,upper_aerodigestive_tract,urinary_tract	AGATATAGATCTTGG	No
CTNNB1	3	41266098	1	Missense	A95	D32	12,5	liver,endometrium	TACCTGGACTCTGGA	No
TP53	17	7577547	-1	Missense	G734	G245	11,5,5,3,3	lung,ovary,upper_aerodigestive_tract,urinary_tract,breast	ATGGGCGGCATGAAC	No
CTNNB1	3	41266097	1	Missense	G94	D32	11,5,3	endometrium,liver,stomach	TTACCTGGACTCTGG	No
PIK3CA	3	178936095	1	Missense	A1637	Q546	11,7,3,3	endometrium,breast,large_intestine,central_nervous_system	ACTGAGCAGGAGAAA	No
FBXW7	4	153249384	-1	Missense	G1394	R465	11,9	large_intestine,endometrium	ACTGTGCGTTGTATG	Yes
CTNNB1	3	41266136	1	Missense	T133	S45	11	liver	AGCTCCTTCTCTGAG	No
TP53	17	7578265	-1	Missense	T584	I195	10,5,3,3	ovary,breast,large_intestine,central_nervous_system	CATCTTATCCGAGTG	No
CDKN2A.p14arf	9	21971186	-1	Missense	C215	P72	10,4	upper_aerodigestive_tract,lung	CAGCGCCCGAGTGGC	Yes
TP53	17	7578394	-1	Missense	A536	H179	10,8,6,5	central_nervous_system,upper_aerodigestive_tract,breast,lung	CCCCACCATGAGCGC	No
MB21D2	3	192516720	-1	Missense	C931	Q311	10,5,3	lung,upper_aerodigestive_tract,urinary_tract	GGCCTATCAGGCCTG	No
TP53	17	7577534	-1	Missense	G747	R249	10,8,3	liver,lung,upper_aerodigestive_tract	ACCGGAGGCCCATCC	No
SOX17	8	55372518	1	Missense	G1208	S403	10	endometrium	GACGCCAGCTCCGCG	No
NRAS	1	115258747	-1	Missense	G35	G12	10,3	large_intestine,endometrium	GGAGCAGGTGGTGTT	No
NRAS	1	115256530	-1	Missense	C181	Q61	10	large_intestine	AGCTGGACAAGAAGA	No
SMAD4	18	48591919	1	Missense	G1082	R361	10,3	large_intestine,stomach	GGAGATCGCTTTTGT	Yes
CNBD1	8	88365898	1	Missense	T1187	L396	10	stomach	GGGAAACTTAAGGAG	No
CIC	19	42791757	1	Missense	C3370	R1124	10	central_nervous_system	GCGGCACCGGGCCCT	Yes
NFE2L2	2	178098944	-1	Missense	G101	R34	10	lung	GTAAGTCGAGAAGTA	Yes
SPOP	17	47696432	-1	Missense	T391	W131	10	prostate	CAAAGACTGGGGATT	No
TP53	17	7577085	-1	Missense	G853	E285	10,3	urinary_tract,breast	GCGCACAGAGGAAGA	No
TP53	17	7578403	-1	Missense	G527	C176	9,8,7,5,5,4,3,3	upper_aerodigestive_tract,lung,ovary,stomach,breast,large_intestine,endometrium,central_nervous_system	AGGCGCTGCCCCCAC	No
TP53	17	7578442	-1	Missense	A488	Y163	9,6,6	lung,ovary,upper_aerodigestive_tract	GCCATCTACAAGCAG	No
TP53	17	7578271	-1	Missense	A578	H193	9,9,8,5,3,3	upper_aerodigestive_tract,lung,breast,central_nervous_system,endometrium,liver	CCTCAGCATCTTATC	No
FBXW7	4	153247289	-1	Missense	C1513	R505	9,8,8,6,3	upper_aerodigestive_tract,endometrium,urinary_tract,large_intestine,lung	AGCAGTCCGCTGTGT	Yes
HRAS	11	534289	-1	Missense	G34	G12	9	upper_aerodigestive_tract	GGGCGCCGGCGGTGT	Yes
PIK3CA	3	178917478	1	Missense	G353	G118	9,5,5	endometrium,central_nervous_system,breast	ATTAAAGGTTTTGCT	No
CTNNB1	3	41266104	1	Missense	G101	G34	9,4	endometrium,liver	GACTCTGGAATCCAT	No
PPP2R1A	19	52716323	1	Missense	C767	S256	9	endometrium	GACAAGTCCTGGCGC	No
FBXW7	4	153249385	-1	Missense	C1393	R465	9,9,7	large_intestine,stomach,endometrium	CACTGTGCGTTGTAT	Yes
ERBB3	12	56478854	1	Missense	G310	V104	9,6,4,4	stomach,large_intestine,endometrium,urinary_tract	CCTCCGCGTGGTGCG	Yes
SPOP	17	47696426	-1	Missense	T397	F133	9	prostate	CTGGGGATTCAAGAA	No
C3orf70	3	184870595	-1	Missense	C17	S6	9	urinary_tract	GCGGCCTCGCCGGCG	Yes
ERCC2	19	45867687	-1	Missense	A713	N238	9	urinary_tract	GCCCACAACATTGGT	No
NDUFS1	2	206992537	-1	Missense	T1910	I637	9	breast	AAAATTATAAGAGCA	No
TP53	17	7577580	-1	Missense	A701	Y234	8,3,3	lung,ovary,central_nervous_system	ATCCACTACAACTAC	No
NFE2L2	2	178098810	-1	Missense	G235	E79	8,8	upper_aerodigestive_tract,lung	AGATGAAGAGACAGG	No
PIK3CA	3	178938934	1	Missense	G2176	E726	8,4,4,3	breast,upper_aerodigestive_tract,large_intestine,lung	GAAGGATGAAACACA	No
PIK3CA	3	178916936	1	Missense	G323	R108	8	endometrium	GGCAACCGTGAAGAA	Yes
PIK3CA	3	178927980	1	Missense	T1258	C420	8,4,4,3	endometrium,large_intestine,breast,stomach	GGAACACTGTCCATT	No
SPOP	17	47696599	-1	Missense	A349	M117	8	endometrium	CAAAGCTATGGGTAA	No
BRAF	7	140481402	-1	Missense	G1406	G469	8	lung	TCATTTGGAACAGTC	No
CDKN2A.p14arf	9	21971108	-1	Missense	G293	R98	8	lung	CGTGCACGACGCTGC	Yes
CDKN2A.p16INK4a	9	21971108	-1	Missense	G250	D84	8	lung	CGTGCACGACGCTGC	Yes
FGFR3	4	1806099	1	Missense	A1124	Y375	8	urinary_tract	AGTGTGTATGCAGGC	No
AHR	7	17375399	1	Missense	G1149	Q383	8	urinary_tract	TAACTCAGAGACCAC	No
TP53	17	7577559	-1	Missense	C722	S241	7,6,5	endometrium,ovary,urinary_tract	AACAGTTCCTGCATG	No
TP53	17	7577106	-1	Missense	C832	P278	7,5,4,4	upper_aerodigestive_tract,lung,large_intestine,breast	TGCCTGTCCTGGGAG	No
HRAS	11	534285	-1	Missense	G38	G13	7	upper_aerodigestive_tract	GCCGGCGGTGTGGGC	No
TP53	17	7577556	-1	Missense	G725	C242	7,4	lung,upper_aerodigestive_tract	AGTTCCTGCATGGGC	No
CTNNB1	3	41266125	1	Missense	C122	T41	7	endometrium	GCCACTACCACAGCT	No
CTNNB1	3	41266103	1	Missense	G100	G34	7	endometrium	GGACTCTGGAATCCA	No
NFE2L2	2	178098945	-1	Missense	C100	R34	7,6,5	endometrium,lung,urinary_tract	AGTAAGTCGAGAAGT	Yes
ACVR1	2	158630626	-1	Missense	G617	R206	7	endometrium	GTGGCTCGCCAGATT	Yes
PIK3CA	3	178916891	1	Missense	G278	R93	7,3	endometrium,stomach	GACCTTCGGCTTTTT	Yes
FBXW7	4	153249510	-1	Missense	G1268	G423	7	endometrium	ACAGGTGGAGTATGG	No
PIK3R1	5	67589138	1	Missense	G1126	G376	7,4	central_nervous_system,endometrium	GAAAGGGGGAAATAA	No
CTNNB1	3	41266137	1	Missense	C134	S45	7,3,3	liver,endometrium,large_intestine	GCTCCTTCTCTGAGT	No
KRAS	12	25398282	-1	Missense	G37	G13	7,3,3	lung,endometrium,large_intestine	AGCTGGTGGCGTAGG	No
PCBP1	2	70315180	1	Missense	T305	L102	7	large_intestine	CTGAGGCTGGTGGTG	No
GNAS	20	57484421	1	Missense	G2531	R844	7,3	large_intestine,lung	CGCTGCCGTGTCCTG	Yes
PIK3CA	3	178928079	1	Missense	G1357	E453	7,3,3,3	breast,stomach,central_nervous_system,urinary_tract	TGGATTAGAAGATTT	No
BRAF	7	140481411	-1	Missense	G1397	G466	7	lung	GGATCTGGATCATTT	No
KLF5	13	73649905	1	Missense	G1255	E419	7	lung	ATCGGATGAGCTGAC	No
ZNF133	20	18296913	1	Missense	G1427	R476	6	ovary	TGTGGCCGGGGCTTC	Yes
TP53	17	7577568	-1	Missense	G713	C238	6,4,4	central_nervous_system,ovary,breast	TACATGTGTAACAGT	No
TP53	17	7578203	-1	Missense	G646	V216	6,3,3	central_nervous_system,ovary,breast	ACATAGTGTGGTGGT	No
MAPK1	22	22127164	-1	Missense	G964	E322	6	upper_aerodigestive_tract	GAGTGACGAGGTAAG	Yes
CDKN2A.p14arf	9	21971028	-1	Missense	G373	G125	6	upper_aerodigestive_tract	ATGCCTGGGGCCGTC	No
TP53	17	7578395	-1	Missense	C535	H179	6,4,3	lung,upper_aerodigestive_tract,central_nervous_system	CCCCCACCATGAGCG	No
PPP2R1A	19	52715982	1	Missense	C547	R183	6,5	endometrium,large_intestine	GGTGCGGCGGGCCGC	Yes
PIK3CA	3	178916725	1	Missense	C112	R38	6	endometrium	ATGCCTCCGTGAGGC	Yes
MAX	14	65560514	-1	Missense	A83	H28	6	endometrium	GCTCATCATAATGCA	No
MYCN	2	16082317	1	Missense	C131	P44	6	endometrium	TCGACCCCCCCGGGG	No
SOS1	2	39281778	-1	Missense	A697	N233	6,3	endometrium,lung	TGTCTCCAATTCAAA	No
PIK3R1	5	67591097	1	Missense	A1690	N564	6,3	endometrium,central_nervous_system	ACGTATGAACAGCAT	No
MYO10	5	16694613	-1	Missense	G3667	G1223	6	endometrium	CAAAAAAGGGGGGGG	No
PIK3CA	3	178936094	1	Missense	C1636	Q546	6,4,4	endometrium,large_intestine,breast	CACTGAGCAGGAGAA	No
ERBB2	17	37881332	1	Missense	G2524	V842	6,4	endometrium,large_intestine	GCGGCTCGTACACAG	Yes
CCND1	11	69466019	1	Missense	C857	T286	6	endometrium	GCTTGCACACCCACC	No
RBM39	20	34302145	-1	Missense	C1058	T353	6	endometrium	TTGGGAACAACTGGT	No
PIK3CA	3	178936092	1	Missense	A1634	E545	6,5,3	breast,endometrium,large_intestine	ATCACTGAGCAGGAG	No
PIK3CA	3	178952072	1	Missense	A3127	M1043	6,4	central_nervous_system,endometrium	GAAACAAATGAATGA	No
FBXW7	4	153245446	-1	Missense	C1745	S582	6	large_intestine	CACCAGTCGTTAACA	Yes
GTF2IRD2	7	74239465	-1	Missense	T355	Y119	6,5	large_intestine,stomach	CTTTTGTTATGGTAA	No
CTNNB1	3	41268766	1	Missense	A1004	K335	6	liver	TACGAAAAACTACTG	No
SPTA1	1	158606546	-1	Missense	A5195	K1732	6	stomach	AGGGAGAAGTTGATA	No
TP53	17	7577570	-1	Missense	G711	M237	6,3	lung,stomach	ACTACATGTGTAACA	No
EGFR	7	55220274	1	Missense	C664	R222	6	central_nervous_system	CTCCGGGCGCTGCCG	Yes
EGFR	7	55211080	1	Missense	G323	R108	6	central_nervous_system	ATCATCAGAGGAAAT	No
EGFR	7	55249022	1	Missense	G2320	V774	6	central_nervous_system	CCCCCACGTGTGCCG	Yes
CIC	19	42791715	1	Missense	C3328	R1110	6	central_nervous_system	CCACATCCGGCGGCC	Yes
TP53	17	7577536	-1	Missense	A745	R249	6	lung	GAACCGGAGGCCCAT	No
NFE2L2	2	178098953	-1	Missense	G92	G31	6	lung	GATCTTGGAGTAAGT	No
TP53	17	7574017	-1	Missense	G1010	R337	6	lung	CGTGAGCGCTTCGAG	Yes
TP53	17	7577127	-1	Missense	G811	E271	6,3	urinary_tract,lung	CAGCTTTGAGGTGCG	No
SPOP	17	47696424	-1	Missense	C399	F133	6	prostate	GGGGATTCAAGAAAT	No
RHOB	2	20647740	1	Missense	G514	E172	6	urinary_tract	GGTCTTCGAGACGGC	Yes
SF3B1	2	198265453	-1	Missense	G2704	E902	6	urinary_tract	TTTCCAAGAACAGAC	No
RARS2	6	88299660	-1	Missense	C16	R6	6,4	urinary_tract,breast	CGGCTTTCGCCGCGC	Yes
SF3B1	2	198266834	-1	Missense	A2098	K700	6	breast	GCAGCAGAAAGTTCG	No
TP53	17	7577105	-1	Missense	C833	P278	5,3	ovary,lung	GCCTGTCCTGGGAGA	No
TP53	17	7577124	-1	Missense	G814	V272	5,4	upper_aerodigestive_tract,ovary	CTTTGAGGTGCGTGT	No
TP53	17	7577114	-1	Missense	G824	C275	5,4,4,3,3	central_nervous_system,ovary,large_intestine,upper_aerodigestive_tract,lung	CGTGTTTGTGCCTGT	No
TP53	17	7577141	-1	Missense	G797	G266	5,4,3	large_intestine,lung,ovary	CTACTGGGACGGAAC	No
TP53	17	7578268	-1	Missense	T581	L194	5,3,3	breast,ovary,lung	CAGCATCTTATCCGA	No
TP53	17	7577551	-1	Missense	G730	G244	5,3,3	lung,ovary,endometrium	CTGCATGGGCGGCAT	No
CDKN2A.p14arf	9	21971096	-1	Missense	G305	G102	5	upper_aerodigestive_tract	TGCCCGGGAGGGCTT	No
EP300	22	41565529	1	Missense	G4195	D1399	5,3	upper_aerodigestive_tract,lung	TTACCTCGATAGTGT	Yes
RAC1	7	6441974	1	Missense	C533	A178	5	upper_aerodigestive_tract	TGCTCGGCGCTCACA	Yes
TP53	17	7579358	-1	Missense	G329	R110	5,5	upper_aerodigestive_tract,lung	GGTTTCCGTCTGGGC	Yes
KPNB1	17	45750492	1	Missense	G1656	L552	5	upper_aerodigestive_tract	CGACTTTGGTCATCA	No
TP53	17	7577574	-1	Missense	A707	Y236	5,4,3	lung,upper_aerodigestive_tract,central_nervous_system	TACAACTACATGTGT	No
FBXW7	4	153247366	-1	Missense	G1436	R479	5,3,3	endometrium,upper_aerodigestive_tract,stomach	GGTTCTCGAGATGCC	Yes
PIK3CA	3	178952074	1	Missense	G3129	M1043	5,3	endometrium,large_intestine	AACAAATGAATGATG	No
NFE2L2	2	178098799	-1	Missense	A246	E82	5	endometrium	CAGGTGAATTTCTCC	No
CTCF	16	67654642	1	Missense	C1129	R377	5	endometrium	TGGAGAGCGTCCGTT	Yes
PIK3CA	3	178916726	1	Missense	G113	R38	5	endometrium	TGCCTCCGTGAGGCT	Yes
NRAS	1	115256529	-1	Missense	A182	Q61	5,4,4,3	endometrium,large_intestine,lung,central_nervous_system	GCTGGACAAGAAGAG	No
PIK3R2	19	18273784	1	Missense	G1117	G373	5	endometrium	GAAAGGCGGGAACAA	Yes
PIK3CA	3	178936083	1	Missense	A1625	E542	5,3	endometrium,large_intestine	CTCTCTGAAATCACT	No
CHD4	12	6700659	-1	Missense	C3313	R1105	5	endometrium	GAACATGCGGCAAGA	Yes
FGFR2	10	123258034	-1	Missense	T1650	N550	5,3	endometrium,breast	TCATAAATCTTCTTG	No
PIK3CA	3	178921548	1	Missense	G1030	V344	5	endometrium	AACCTACGTGAATGT	Yes
RRAS2	11	14316390	-1	Missense	A233	Q78	5	endometrium	GCAGGACAAGAAGAG	No
CTNNB1	3	41266112	1	Missense	T109	S37	5	endometrium	AATCCATTCTGGTGC	No
FGFR2	10	123274774	-1	Missense	T1147	C383	5	endometrium	CATTTACTGCATAGG	No
CTNNB1	3	41266124	1	Missense	A121	T41	5,5,4	endometrium,liver,large_intestine	TGCCACTACCACAGC	No
POLE	12	133253184	-1	Missense	C857	P286	5	endometrium	AAGTTTCCTGATGCT	No
TCF7L2	10	114925333	1	Missense	C1462	R488	5	large_intestine	GTGCGTTCGCTACAT	Yes
PAX3	2	223066812	-1	Missense	C1271	T424	5	large_intestine	ACCACCACGGTGTCG	Yes
ATM	11	108117798	1	Missense	C1009	R337	5	large_intestine	AGGATTTCGTAATAT	Yes
KRAS	12	25380277	-1	Missense	C181	Q61	5	large_intestine	AGCAGGTCAAGAGGA	No
TP53	17	7578455	-1	Missense	G475	A159	5,3	lung,large_intestine	CGTCCGCGCCATGGC	Yes
CTNNB1	3	41266100	1	Missense	T97	S33	5	liver	CCTGGACTCTGGAAT	No
RHOA	3	49412898	-1	Missense	A125	Y42	5	stomach	GAGAACTATGTGGCA	No
ITGB1	10	33209310	-1	Missense	C1132	L378	5	stomach	TTAGTCCCTTTCCTC	No
CD1E	1	158324361	1	Missense	T253	F85	5	stomach	TGGAAACTTCAGCAA	No
RIMS2	8	104898169	1	Missense	T676	L226	5	stomach	ACCAGACTTGAGGCG	No
OR4C16	11	55340006	1	Missense	A403	S135	5	stomach	CATCATAAGCCAGTG	No
TP53	17	7577082	-1	Missense	G856	E286	5,3,3	lung,stomach,breast	CACAGAGGAAGAGAA	No
EGFR	7	55210075	1	Missense	T185	L62	5	central_nervous_system	GTGGTCCTTGGGAAT	No
SLC6A18	5	1238077	1	Missense	A634	T212	5	central_nervous_system	TTACTTCACAGCTTT	No
EGFR	7	55221710	1	Missense	C754	R252	5	central_nervous_system	GGTCTGCCGCAAATT	Yes
CIC	19	42799051	1	Missense	G7253	R2418	5	central_nervous_system	AAGATCCGTGAGGTG	Yes
CIC	19	42791718	1	Missense	C3331	R1111	5	central_nervous_system	CATCCGGCGGCCCAT	Yes
TP53	17	7578208	-1	Missense	A641	H214	5,3	lung,central_nervous_system	TTTCGACATAGTGTG	No
EGFR	7	55259524	1	Missense	T2582	L861	5	lung	GCCAAACTGCTGGGT	No
CDKN2A.p14arf	9	21971036	-1	Missense	G365	R122	5,5	lung,urinary_tract	CGTGCGCGATGCCTG	Yes
CDKN2A.p16INK4a	9	21971036	-1	Missense	G322	D108	5,5	lung,urinary_tract	CGTGCGCGATGCCTG	Yes
TP53	17	7578469	-1	Missense	G461	G154	5	lung	CCGCCCGGCACCCGC	No
TP53	17	7579374	-1	Missense	G313	G105	5	lung	CTACCAGGGCAGCTA	No
KEAP1	19	10600417	-1	Missense	G1438	G480	5	lung	CTTTGACGGGACAAA	Yes
HSPB8	12	119617367	1	Missense	G250	E84	5	lung	GCCTGCCGAGGGCAG	Yes
SPOP	17	47696688	-1	Missense	A260	Y87	5	prostate	TCACTTTACCTGTTA	No
SPOP	17	47696425	-1	Missense	T398	F133	5	prostate	TGGGGATTCAAGAAA	No
FGFR3	4	1806089	1	Missense	G1114	G372	5	urinary_tract	CGAGGCGGGCAGTGT	No
RHOB	2	20647449	1	Missense	C223	P75	5	urinary_tract	CTCCTACCCGGACAC	No
MROH2B	5	41009477	-1	Missense	G3325	E1109	5	urinary_tract	GCTGGCTGAAAAGCC	No
CELSR3	3	48699002	-1	Missense	G1066	E356	5	urinary_tract	CGCCGGCGAGGCCGG	Yes
ERBB2	17	37880220	1	Missense	T2264	L755	5	breast	AAAGTGTTGAGGGAA	No
VHL	3	10188200	1	Missense	C343	H115	5	kidney	GATAGGTCACCTTTG	No
TP53	17	7578272	-1	Missense	C577	H193	4,3	lung,ovary	TCCTCAGCATCTTAT	No
HRAS	11	534286	-1	Missense	G37	G13	4,3	upper_aerodigestive_tract,lung	CGCCGGCGGTGTGGG	Yes
TP53	17	7578413	-1	Missense	G517	V173	4,4,4,4,3,3	upper_aerodigestive_tract,central_nervous_system,lung,breast,large_intestine,stomach	GGAGGTTGTGAGGCG	No
HIST1H3C	6	26045748	1	Missense	A110	K37	4	upper_aerodigestive_tract	GGCGTGAAGAAACCT	No
TP53	17	7577090	-1	Missense	G848	R283	4	upper_aerodigestive_tract	GACCGGCGCACAGAG	Yes
RHOA	3	49412905	-1	Missense	G118	E40	4	upper_aerodigestive_tract	AGTGTTTGAGAACTA	No
TP53	17	7578479	-1	Missense	C451	P151	4,3,3,3	upper_aerodigestive_tract,endometrium,stomach,central_nervous_system	TTCCACACCCCCGCC	No
TGFBR2	3	30732942	1	Missense	G1630	E544	4	upper_aerodigestive_tract	GTTGACTGAGTGCTG	No
HRAS	11	534288	-1	Missense	G35	G12	4	upper_aerodigestive_tract	GGCGCCGGCGGTGTG	No
TP53	17	7578526	-1	Missense	G404	C135	4,3	upper_aerodigestive_tract,large_intestine	ATGTTTTGCCAACTG	No
ERBB2	17	37881000	1	Missense	G2329	V777	4,3	breast,upper_aerodigestive_tract	GGCTGGTGTGGGCTC	No
CDKN2A.p14arf	9	21971111	-1	Missense	C290	A97	4,3	lung,upper_aerodigestive_tract	ACCCGTGCACGACGC	No
CDKN2A.p16INK4a	9	21971111	-1	Missense	C247	H83	4,3	lung,upper_aerodigestive_tract	ACCCGTGCACGACGC	No
FBXW7	4	153247288	-1	Missense	G1514	R505	4	endometrium	GCAGTCCGCTGTGTT	Yes
PTEN	10	89711900	1	Missense	G518	R173	4,3	endometrium,central_nervous_system	CAGAGGCGCTATGTG	Yes
ABCB1	7	87179322	-1	Missense	C1399	R467	4	endometrium	GTTTCTACGGGAAAT	Yes
UPF2	10	11990443	-1	Missense	A3099	E1033	4,4,3	endometrium,large_intestine,stomach	AGGATGAAGAAGAAG	No
PTEN	10	89692922	1	Missense	T406	C136	4	endometrium	AATGATATGTGCATA	No
PIK3CA	3	178952007	1	Missense	A3062	Y1021	4	endometrium	ATTGCATACATTCGA	No
CHD4	12	6701583	-1	Missense	G2924	R975	4,3	endometrium,large_intestine	ATTGTGCGTGTGGAG	Yes
PIK3CA	3	178921552	1	Missense	A1034	N345	4	endometrium	TACGTGAATGTAAAT	No
CHD4	12	6697097	-1	Missense	C3484	R1162	4	endometrium	AGCTCACCGGATTGG	Yes
CTCF	16	67654643	1	Missense	G1130	R377	4	endometrium	GGAGAGCGTCCGTTT	Yes
PIK3CA	3	178952084	1	Missense	C3139	H1047	4,4	endometrium,large_intestine	TGATGCACATCATGG	No
FBXW7	4	153247168	-1	Missense	A1634	Y545	4	endometrium	AGAGTCTATTCATTA	No
METTL14	4	119626803	1	Missense	G893	R298	4	endometrium	GTGAAGCGTAGCACA	Yes
PIK3CA	3	178952077	1	Missense	T3132	N1044	4	endometrium	AAATGAATGATGCAC	No
MECOM	3	168834483	-1	Missense	C1177	R393	4	endometrium	CCTTTGCCGTCATAA	Yes
PIK3CA	3	178936093	1	Missense	G1635	E545	4	endometrium	TCACTGAGCAGGAGA	No
METAP1	4	99978957	1	Missense	A985	M329	4	endometrium	TGAGCCAATGATTTG	No
TP53	17	7578235	-1	Missense	A614	Y205	4,3,3,3	lung,endometrium,large_intestine,liver	GTGGAGTATTTGGAT	No
ERBB2	17	37879658	1	Missense	G2033	R678	4,3	stomach,endometrium	AAGCGACGGCAGCAG	Yes
FAM194A	3	150421525	-1	Missense	A161	E54	4	large_intestine	GAGGAGGAGGTGGTG	No
KRAS	12	25378647	-1	Missense	A351	K117	4	large_intestine	GAAATAAATGTGATT	No
KRAS	12	25380276	-1	Missense	A182	Q61	4	large_intestine	GCAGGTCAAGAGGAG	No
KRAS	12	25380275	-1	Missense	A183	Q61	4	large_intestine	CAGGTCAAGAGGAGT	No
EDIL3	5	83402535	-1	Missense	C583	R195	4	large_intestine	CTATGCACGTCTTAA	Yes
TOP2B	3	25668727	-1	Missense	G1967	R656	4	large_intestine	AGGCATCGCATCTTG	Yes
LMBRD1	6	70423652	-1	Missense	G800	R267	4	large_intestine	GATAAACGCGCCTTA	Yes
RYR2	1	237947200	1	Missense	C12206	T4069	4	large_intestine	TCAGAAACGGAATTT	Yes
SMAD4	18	48604787	1	Missense	G1609	D537	4	large_intestine	GCTCCTAGACGAAGT	No
STAG1	3	136287655	-1	Missense	G346	A116	4	large_intestine	GGACATCGCACTTCT	Yes
SMAD4	18	48591918	1	Missense	C1081	R361	4,4	large_intestine,stomach	AGGAGATCGCTTTTG	Yes
C6	5	41149516	-1	Missense	A2450	K817	4,3	stomach,large_intestine	GCTTGTAAGTTTTTG	No
EEF1A1	6	74227627	-1	Missense	C1295	T432	4	liver	AGACAGACAGTTGCG	No
EEF1A1	6	74227628	-1	Missense	A1294	T432	4	liver	GAGACAGACAGTTGC	No
PCCA	13	100909900	1	Missense	G689	R230	4	stomach	GGCATGCGCATTGCT	Yes
ZHX3	20	39832810	-1	Missense	C747	N249	4	stomach	CAAAAAACCCCCATG	No
KCNMB2	3	178560470	1	Missense	T453	N151	4	stomach	GAAAAAATTTTGAAG	No
TUSC3	8	15480646	1	Missense	T196	F66	4	stomach	CTCAATCTTCCGAAT	No
NPAP1	15	24922914	1	Missense	A1900	S634	4	stomach	CACCCCAAGTTTTAA	No
CNGA4	11	6265440	1	Missense	A1529	K510	4	stomach	CAGACCAAGTTTGCT	No
EPB41L3	18	5394733	-1	Missense	A3213	K1071	4	stomach	TGACCAAAGTAGTGG	No
CCDC169-SOHLH2	13	36776025	-1	Missense	A485	K162	4	stomach	GCCATCAAGTTAATT	No
SOHLH2	13	36776025	-1	Missense	A485	K162	4	stomach	GCCATCAAGTTAATT	No
MYCT1	6	153019200	1	Missense	A163	S55	4	stomach	CACAACAAGTTTAGG	No
CDH11	16	65005898	-1	Missense	A1460	K487	4	stomach	GCTCCCAAGTTTGCT	No
TOP2A	17	38560458	-1	Missense	G2229	K743	4	stomach	AAGTAAAGGTTGCCC	No
ZNF98	19	22585671	-1	Missense	A173	K58	4	stomach	GCCTCTAAGCCAGAC	No
TRIM49	11	89531678	-1	Missense	A979	S327	4	stomach	ACCTAGAAGTTTTCT	No
EGFR	7	55221743	1	Missense	A787	T263	4	central_nervous_system	CAAGGACACCTGCCC	No
TP53	17	7578466	-1	Missense	C464	T155	4	central_nervous_system	CCCGGCACCCGCGTC	No
ZDHHC4	7	6628405	1	Missense	G899	R300	4	central_nervous_system	TGCCAGCGTTGTCCC	Yes
CIC	19	42799059	1	Missense	C7261	R2421	4	central_nervous_system	TGAGGTGCGCCAGAA	Yes
IDH2	15	90631839	-1	Missense	A514	R172	4	central_nervous_system	CATTGGCAGGCACGC	No
CIC	19	42791758	1	Missense	G3371	R1124	4	central_nervous_system	CGGCACCGGGCCCTG	Yes
TP53	17	7579373	-1	Missense	G314	G105	4	lung	TACCAGGGCAGCTAC	No
KIF2B	17	51900791	1	Missense	G397	V133	4	lung	CCTGGATGTGAGGGT	No
OR5D18	11	55587917	1	Missense	C812	T271	4	lung	AGGCACACAGTCAAA	No
TP53	17	7578407	-1	Missense	C523	R175	4	lung	TGTGAGGCGCTGCCC	Yes
FMN2	1	240255893	1	Missense	G484	D162	4	lung	CGCCGAGGATGTGGA	No
TP53	17	7578454	-1	Missense	C476	A159	4,3	lung,urinary_tract	GTCCGCGCCATGGCC	No
TP53	17	7577550	-1	Missense	G731	G244	4	lung	TGCATGGGCGGCATG	No
KEAP1	19	10602581	-1	Missense	G997	G333	4	lung	CGCGGGCGGCTACTT	Yes
KEAP1	19	10602767	-1	Missense	G811	V271	4	lung	GCGGGCCGTGCGCTG	Yes
NFE2L2	2	178098957	-1	Missense	C88	L30	4	lung	TATAGATCTTGGAGT	No
KEAP1	19	10600447	-1	Missense	C1408	R470	4	lung	CCTCAATCGTCTCCT	Yes
HIST1H3D	6	26197163	-1	Missense	G316	E106	4	lung	GCTGTTTGAGGACAC	No
KRTAP5-1	11	1605902	-1	Missense	C578	S193	4	lung	GGGGGATCCAAGGGG	No
TP53	17	7574026	-1	Missense	G1001	G334	4	lung	ATCCGTGGGCGTGAG	No
SPOP	17	47696643	-1	Missense	T305	F102	4	prostate	GCAAAATTCAAATTC	No
SPOP	17	47696644	-1	Missense	T304	F102	4	prostate	GGCAAAATTCAAATT	No
HIST1H3B	6	26031895	-1	Missense	C394	R132	4	urinary_tract	CCGCATTCGCGGAGA	Yes
PBX2	6	32157485	-1	Missense	G208	E70	4	urinary_tract	CCTGGACGAGGCCCA	Yes
HIST2H2BE	1	149857978	-1	Missense	C213	F71	4	urinary_tract	ACATCTTCGAGCGCA	Yes
ASXL2	2	25978935	-1	Missense	G988	E330	4	urinary_tract	TAACAATGAATTCTT	No
ACTB	7	5568242	-1	Missense	G472	G158	4	urinary_tract	CGGTGACGGGGTCAC	Yes
ACSS3	12	81536974	1	Missense	C869	S290	4	urinary_tract	GTTCTTTCAGAACAC	No
ADCY8	8	132052131	-1	Missense	G449	R150	4	urinary_tract	AGCTACCGAGGGGTC	Yes
PPCS	1	42922574	1	Missense	C338	S113	4	urinary_tract	GCCCTTTCGGGCTTG	Yes
CUL1	7	148484180	1	Missense	G1447	D483	4	urinary_tract	AAGTGACGATGCCGA	Yes
ZEB2	2	145147383	-1	Missense	G3280	E1094	4	urinary_tract	GGAGCGCGAGGCGCG	Yes
GATA3	10	8106058	1	Missense	T881	M294	4	breast	CACAAAATGAACGGA	No
MET	7	116423474	1	Missense	T3803	M1268	4	kidney	AAGTGGATGGCTTTG	No
VHL	3	10191480	1	Missense	T473	L158	4	kidney	TATACTCTGAAAGAG	No
EPHA3	3	89448604	1	Missense	A1568	K523	3	upper_aerodigestive_tract	AGCCGCAAGTTTGAG	No
PNLIPRP3	10	118236283	1	Missense	A1292	K431	3	upper_aerodigestive_tract	CAGAATAAGTTGGGA	No
KCNT2	1	196250003	-1	Missense	T2897	L966	3	upper_aerodigestive_tract	CAGAAACTTACTACA	No
HRAS	11	533874	-1	Missense	A182	Q61	3,3,3	upper_aerodigestive_tract,prostate,urinary_tract	GCCGGCCAGGAGGAG	No
MYH9	22	36708234	-1	Missense	G1588	E530	3	upper_aerodigestive_tract	GCTGGACGAGGAGTG	Yes
TP53	17	7574018	-1	Missense	C1009	R337	3,3,3	upper_aerodigestive_tract,large_intestine,lung	GCGTGAGCGCTTCGA	Yes
OR11H12	14	19377681	1	Missense	C88	Q30	3	upper_aerodigestive_tract	TATACTCCAAGGTTT	No
SYT6	1	114680442	-1	Missense	G746	R249	3	upper_aerodigestive_tract	ATTGTGCGTATCCTG	Yes
TP53	17	7578553	-1	Missense	A377	Y126	3	upper_aerodigestive_tract	CTACAGTACTCCCCT	No
PRDM9	5	23522455	1	Missense	G551	R184	3	upper_aerodigestive_tract	AGCCTGCGAGAAAGA	Yes
TP53	17	7578211	-1	Missense	G638	R213	3	upper_aerodigestive_tract	ACTTTTCGACATAGT	Yes
NOTCH1	9	139412282	-1	Missense	G1363	E455	3	upper_aerodigestive_tract	CGTCAACGAGTGCGT	Yes
TP53	17	7579369	-1	Missense	C318	S106	3	upper_aerodigestive_tract	AGGGCAGCTACGGTT	No
MYC	8	128750945	1	Missense	C482	S161	3	upper_aerodigestive_tract	CTCGTCTCAGAGAAG	No
PAPD7	5	6755014	1	Missense	C1585	H529	3	upper_aerodigestive_tract	GAAAAAACACACACA	No
ATP10B	5	160067536	-1	Missense	G932	R311	3	upper_aerodigestive_tract	ATTGAGCGGCGCATG	Yes
C10orf76	10	103771512	-1	Missense	C799	Q267	3	upper_aerodigestive_tract	AGAACACCAAAGTGG	No
DNAH5	5	13717530	-1	Missense	A12599	K4200	3,3	upper_aerodigestive_tract,stomach	AGGCGCAAGTTCGGT	No
DNAH10	12	124298415	1	Missense	G3382	D1128	3	upper_aerodigestive_tract	ATATAGGGACGTCCA	No
NFE2L2	2	178098800	-1	Missense	A245	E82	3	upper_aerodigestive_tract	ACAGGTGAATTTCTC	No
SLC24A4	14	92908448	1	Missense	G409	E137	3	upper_aerodigestive_tract	TCTGAGCGAAGATGT	Yes
PTEN	10	89692791	1	Missense	A275	D92	3	endometrium	TTTGAAGACCATAAC	No
RYR1	19	38993258	1	Missense	G7726	A2576	3	endometrium	ACACCGCGCCATCAT	Yes
POLE	12	133250289	-1	Missense	G1231	V411	3	endometrium	CAGGTGGGTGAAGAG	No
OR4M1	14	20248736	1	Missense	C255	F85	3	endometrium	TAGACTTCTTTGTGG	No
ZNF257	19	22271727	1	Missense	G1175	R392	3	endometrium	CATAAGAGAATTCAT	No
CHD4	12	6700658	-1	Missense	G3314	R1105	3	endometrium	AACATGCGGCAAGAG	Yes
PRAMEF20	1	13747459	1	Missense	G1154	R385	3	endometrium	AGCTTCCGTGGAAAT	Yes
THRA	17	38245533	1	Missense	G1057	V353	3	endometrium	GCACTACGTCAACCA	Yes
PPP2R1A	19	52716326	1	Missense	G770	W257	3	endometrium	AAGTCCTGGCGCGTC	No
CCND1	11	69466021	1	Missense	C859	P287	3	endometrium	TTGCACACCCACCGA	No
NFE2L2	2	178098804	-1	Missense	G241	G81	3	endometrium	AGAGACAGGTGAATT	No
C10orf120	10	124457811	-1	Missense	C446	A149	3	endometrium	GTGATTGCGCCCCTG	Yes
PTEN	10	89692896	1	Missense	G380	G127	3	endometrium	AAAGCTGGAAAGGGA	No
PCDHGA1	5	140712338	1	Missense	C2087	A696	3	endometrium	GTGGTGGCGGCGGCC	Yes
PIK3CA	3	178916944	1	Missense	A331	K111	3	endometrium	TGAAGAAAAGATCCT	No
ACVR1	2	158617533	-1	Missense	C1123	R375	3	endometrium	CAATCCCCGTGTGGG	Yes
DET1	15	89074021	-1	Missense	C949	R317	3	endometrium	GTGGCGCCGGGCAGA	Yes
PIK3R1	5	67591106	1	Missense	A1699	K567	3	endometrium	CAGCATTAAACCAGA	No
OGDHL	10	50966551	-1	Missense	C88	R30	3	endometrium	TGGCTGGCGCAGCAG	Yes
TRIM44	11	35685117	1	Missense	C458	A153	3	endometrium	TCCGAGGCGGAGGGA	Yes
FBXW7	4	153244092	-1	Missense	C2065	R689	3,3	endometrium,large_intestine	TGGGAGTCGGAATGG	Yes
MYC	8	128752960	1	Missense	A1121	H374	3	endometrium	CGAACACACAACGTC	No
TP53	17	7578508	-1	Missense	G422	C141	3,3	endometrium,breast	AAGACCTGCCCTGTG	No
PTEN	10	89692911	1	Missense	G395	G132	3,3	endometrium,central_nervous_system	CGAACTGGTGTAATG	No
SPOP	17	47699360	-1	Missense	G148	E50	3	endometrium	AATGGGTGAAGTCAT	No
PTEN	10	89711875	1	Missense	G493	G165	3	endometrium	CCACCAGGGAGTAAC	No
SCAF4	21	33044112	-1	Missense	G3044	R1015	3	endometrium	CGGGAACGGTATGGG	Yes
CAD	2	27465263	1	Missense	C6190	R2064	3	endometrium	CACCATCCGTGAGGA	Yes
PCDHGA6	5	140753951	1	Missense	C301	R101	3	endometrium	GAGCCCGCGGTGTCT	Yes
KAT6A	8	41791093	-1	Missense	G4645	G1549	3	endometrium	GGACAGCGGCTTCAG	Yes
PTEN	10	89692792	1	Missense	C276	D92	3	endometrium	TTGAAGACCATAACC	No
TEKT3	17	15234553	-1	Missense	C350	S117	3	endometrium	CATAATTCGGAGAAA	Yes
SF3B1	2	198265007	-1	Missense	G2870	R957	3	endometrium	ATTTCTCGAACTGCT	Yes
PTEN	10	89692923	1	Missense	G407	C136	3	endometrium	ATGATATGTGCATAT	No
CD55	1	207498083	1	Missense	G466	E156	3	endometrium	AGCAGTCGAATTTTG	Yes
ZNF678	1	227843477	1	Missense	G1691	R564	3	endometrium	TATAAGAGAATTTAT	No
EPX	17	56281654	1	Missense	G2018	R673	3	endometrium	TTGTCTCGAATTATA	Yes
DCLK2	4	151114356	1	Missense	C823	R275	3	endometrium	AAAATTTCGTTATGC	Yes
MAX	14	65544747	-1	Missense	G179	R60	3,3	endometrium,central_nervous_system	GCATCCCGGGCCCAA	Yes
SYTL2	11	85435915	-1	Missense	G3157	E1053	3	endometrium	GTTCCTCGAATTCAG	Yes
CRB1	1	197404099	1	Missense	G3106	E1036	3	endometrium	ATGGCACGAAGTGAC	Yes
PTEN	10	89692940	1	Missense	C424	R142	3	endometrium	ATTACATCGGGGCAA	Yes
PIK3R2	19	18278070	1	Missense	A1690	K564	3	endometrium	CAGCCTCAAGCCGGA	No
ZP4	1	238053923	-1	Missense	C13	R5	3	large_intestine	GCTGCTGCGGTGCGT	Yes
PIWIL1	12	130851689	1	Missense	C2207	T736	3	large_intestine	AGACTAACGGTAATT	Yes
TBX2	17	59485586	1	Missense	C1858	R620	3	large_intestine	CCGACTGCGTTTCAG	Yes
LSM14A	19	34710328	1	Missense	C814	R272	3	large_intestine	GAGAGGGCGTGGGGG	Yes
HOXD4	2	177016482	1	Missense	G121	A41	3	large_intestine	CGGCGGCGCGCAGGG	Yes
TCF7L2	10	114912188	1	Missense	C1258	R420	3	large_intestine	GTCCGCGCGGGATAA	Yes
TBC1D22A	22	47507446	1	Missense	G1372	A458	3	large_intestine	CGTGTGCGCTGCTTT	Yes
THYN1	11	134121181	-1	Missense	G65	R22	3	large_intestine	GGAAAACGCACCAAA	Yes
FAM170A	5	118968553	1	Missense	G181	V61	3	large_intestine	CTCCTGCGTTTCTTC	Yes
ITGA1	5	52214576	1	Missense	C2003	A668	3	large_intestine	GATGTGGCCGTAGTT	No
SLC24A2	9	19619585	-1	Missense	G1075	E359	3	large_intestine	ACTCGCCGAAGGTAA	Yes
SHPRH	6	146240543	-1	Missense	C4105	R1369	3	large_intestine	AAGAGTGCGTGATCC	Yes
UNC13C	15	54919114	1	Missense	G6448	G2150	3	large_intestine	AATTATCGGAATGAC	Yes
ATP8B2	1	154304153	1	Missense	C536	A179	3	large_intestine	TTTGTGGCGGTAAGG	Yes
NWD1	19	16918475	1	Missense	C3815	T1272	3	large_intestine	CTATTTACGGGCCTC	Yes
PRSS35	6	84234218	1	Missense	G1058	R353	3	large_intestine	TATCTGCGTCTGAAA	Yes
AGBL5	2	27277614	1	Missense	G668	R223	3	large_intestine	GAGCCCCGTCTAGAG	Yes
SYNE1	6	152470650	-1	Missense	C24604	R8202	3	large_intestine	CTTCGGGCGTGTGGA	Yes
IRGQ	19	44097409	-1	Missense	G641	R214	3	large_intestine	TGGGTGCGCTCAGGC	Yes
PXDNL	8	52258474	-1	Missense	C3935	T1312	3	large_intestine	GCAGTGACGCAAGAG	Yes
TMTC1	12	29757205	-1	Missense	G1342	G448	3	large_intestine	TTTAGTCGGCTTGTT	Yes
LCP1	13	46716466	-1	Missense	G1463	R488	3	large_intestine	GGAAACCGCACTCTC	Yes
PRPF8	17	1563231	-1	Missense	G4850	R1617	3	large_intestine	CATCCCCGAAAGTCA	Yes
SMARCA4	19	11132437	1	Missense	C2653	R885	3	large_intestine	AGGTCACCGCATGAA	Yes
COL6A3	2	238289624	-1	Missense	G1831	A611	3	large_intestine	CCGAGCCGCCCCATT	Yes
T	6	166571895	-1	Missense	G1216	A406	3	large_intestine	GGCGGCCGCGGCCAC	Yes
SMAD2	18	45374881	-1	Missense	G962	R321	3	large_intestine	GTTAACCGAAATGCC	Yes
DKK2	4	107845202	-1	Missense	G689	R230	3	large_intestine	TTCCAGCGTTGCGAC	Yes
AKNAD1	1	109366208	-1	Missense	G2039	C680	3	large_intestine	AGAGCCTGCAGGAAA	No
IL18R1	2	102988513	1	Missense	T403	F135	3	large_intestine	TAAAAAATTTTTTCA	No
COL6A3	2	238296564	-1	Missense	G973	A325	3	large_intestine	CGGCCTCGCCCTTGA	Yes
ZNF597	16	3486729	-1	Missense	C970	R324	3	large_intestine	CTCTGAACGCTGCAG	Yes
TPO	2	1507809	1	Missense	G2476	A826	3	large_intestine	TCTCTGCGCGGACCC	Yes
MEFV	16	3293377	-1	Missense	G2110	V704	3	large_intestine	GTCCAGCGTTCCCCC	Yes
BRPF1	3	9776020	1	Missense	C196	R66	3	large_intestine	AAAGGGGCGCCAGTC	Yes
SCN11A	3	38945502	-1	Missense	G1696	V566	3	large_intestine	GCTGTGCGTTAAGAA	Yes
PIK3CA	3	178921549	1	Missense	T1031	V344	3	large_intestine	ACCTACGTGAATGTA	No
SAMD9L	7	92760745	-1	Missense	A4540	K1514	3	large_intestine	TGTGTGGAAAAAAAA	No
DPP8	15	65793045	-1	Missense	G493	G165	3	large_intestine	AACAGTCGGAATTGC	Yes
SDK1	7	4153028	1	Missense	C3542	T1181	3	large_intestine	AGCGTCACGGTCCGT	Yes
ATP10A	15	25959028	-1	Missense	G2137	V713	3	large_intestine	CAACTGCGTGCTTGT	Yes
PAXBP1	21	34134464	-1	Missense	C814	R272	3	large_intestine	GAAACGCCGGATAGT	Yes
BRD2	6	32944477	1	Missense	C964	R322	3	large_intestine	GAGTGGTCGCCCCAT	Yes
NEB	2	152408253	-1	Missense	C19943	S6648	3	large_intestine	CAGAGTTCGGTGAGC	Yes
CADPS	3	62464048	-1	Missense	G3217	A1073	3	large_intestine	ACTTGACGCCCTTCA	Yes
DCAF4L2	8	88885187	-1	Missense	C1013	T338	3	large_intestine	TGCTACACGAGAATC	Yes
SPTB	14	65271701	-1	Missense	C256	R86	3	large_intestine	GGATGGGCGCATGCT	Yes
C22orf29	22	19839750	-1	Missense	G35	R12	3	large_intestine	GGCCCTCGCATTCCC	Yes
GABRB2	5	160753376	-1	Missense	C1190	T397	3	large_intestine	CTGTATACGGTTAGA	Yes
AGPAT4	6	161574408	-1	Missense	G634	A212	3	large_intestine	GGGCTTCGCCATCAC	Yes
DENND5A	11	9172291	-1	Missense	C2542	R848	3	large_intestine	TTCAGAACGTAGGAA	Yes
TPO	2	1544469	1	Missense	C2722	R908	3	large_intestine	ACCGCAGCGGGCCGC	Yes
PCDH7	4	30921914	1	Missense	C3314	A1105	3	large_intestine	CTGGGTGCGCTTCCA	Yes
C5orf42	5	37196023	-1	Missense	G3748	A1250	3	large_intestine	AGGTATCGCATTTTT	Yes
OR2M3	1	248367073	1	Missense	G704	R235	3	large_intestine	GGTCGTCGCAAAGCT	Yes
ADCY2	5	7802364	1	Missense	G2662	V888	3	large_intestine	CGTCTGCGTCATGTT	Yes
NTNG1	1	107867468	1	Missense	G811	V271	3	large_intestine	ACCAGCCGTTGGGGA	Yes
DNAH3	16	20975196	-1	Missense	C10010	T3337	3	large_intestine	CACAGCACGAAGAGC	Yes
MED24	17	38176550	-1	Missense	C2755	R919	3	large_intestine	CAACATGCGGGACCC	Yes
LRRTM1	2	80529941	-1	Missense	G1004	R335	3	large_intestine	CAGGGGCGCTACGAT	Yes
SLC7A5	16	87866620	-1	Missense	G1480	V494	3	large_intestine	CACGACCGTCCTGTG	Yes
NRAS	1	115258748	-1	Missense	G34	G12	3	large_intestine	TGGAGCAGGTGGTGT	No
RAF1	3	12645699	-1	Missense	C770	S257	3	large_intestine	CAGAGGTCGACATCC	Yes
TECTA	11	121028656	1	Missense	C4412	A1471	3	large_intestine	GAGTGTGCGCTGCGC	Yes
MSX2	5	174156219	1	Missense	G437	R146	3	large_intestine	AAGCCGCGCACGCCC	Yes
NRAS	1	115258745	-1	Missense	G37	G13	3	large_intestine	AGCAGGTGGTGTTGG	No
ZSCAN31	6	28297163	-1	Missense	C298	R100	3	large_intestine	CTGGGTGCGGGAGCA	Yes
TP53I13	17	27899563	1	Missense	G917	R306	3	large_intestine	ACCCCACGCACTGAA	Yes
KIAA1755	20	36854123	-1	Missense	G2113	A705	3	large_intestine	GCTGCCCGCAGTCCT	Yes
GCN1L1	12	120582225	-1	Missense	C5380	R1794	3	large_intestine	GTTTGTGCGTGACAC	Yes
ARHGEF11	1	156912567	-1	Missense	C3241	R1081	3	large_intestine	AGATAAACGGGCCTT	Yes
PPP1R16B	20	37464776	1	Missense	G208	V70	3	large_intestine	GGCCAGCGTGGCCCT	Yes
ZBTB21	21	43411860	-1	Missense	G2345	R782	3	large_intestine	TGCATGCGCACCTTC	Yes
ONECUT2	18	55103500	1	Missense	C552	H184	3	large_intestine	ACCACCACCAGCGCC	No
SFRP4	7	37955827	-1	Missense	C313	R105	3	large_intestine	ACGCGCGCGCGACGA	Yes
GNAS	20	57484420	1	Missense	C2530	R844	3	liver	TCGCTGCCGTGTCCT	Yes
CTNNB1	3	41266110	1	Missense	A107	H36	3	liver	GGAATCCATTCTGGT	No
CTNNB1	3	41266107	1	Missense	T104	I35	3	liver	TCTGGAATCCATTCT	No
CTNNB1	3	41274911	1	Missense	T1161	N387	3	liver	TCAGGAATCTTTCAG	No
KCNH1	1	211192300	-1	Missense	T857	L286	3	stomach	CCCAAACTTATCCGC	No
BTBD11	12	108004005	1	Missense	C1682	A561	3	stomach	CTGGATGCGGTGGCC	Yes
BAP1	3	52442054	-1	Missense	G295	V99	3	stomach	GCTGAGCGTGCTCCT	Yes
RXFP3	5	33937024	1	Missense	C179	A60	3	stomach	GACGGCGCGCCGCCA	Yes
OR2M5	1	248308867	1	Missense	A418	I140	3	stomach	ACCCAAAATTTGTGG	No
EDNRB	13	78492668	-1	Missense	C311	A104	3	stomach	CTGGTTGCGCTGGTT	Yes
PAX1	20	21687619	1	Missense	C830	A277	3	stomach	GGCACGGCGGGCCAC	Yes
TTI1	20	36640099	-1	Missense	G2120	R707	3	stomach	AATCTGCGTCATCTG	Yes
FLRT2	14	86087980	1	Missense	G122	R41	3	stomach	GTGTGCCGCTGCGAC	Yes
FASN	17	80049217	-1	Missense	C1373	A458	3	stomach	GACATCGCGGCTGTC	Yes
PRKCG	19	54401306	1	Missense	C1033	R345	3	stomach	TCCAGGACGCCTGCA	Yes
DEPDC7	11	33050184	1	Missense	C628	R210	3	stomach	AATTGGGCGTCTACT	Yes
DSEL	18	65180462	-1	Missense	A1414	S472	3	stomach	GTGGAGAAGTTTTAA	No
XIRP2	2	168100923	1	Missense	A3021	E1007	3	stomach	AGCAAGAAGAAATCG	No
SNTG1	8	51449331	1	Missense	C643	R215	3	stomach	TCATTCGCGCTTCTC	Yes
CLSTN1	1	9795564	-1	Missense	C1844	T615	3	stomach	TTCCCCACGCCCGGA	Yes
RP1	8	55534032	1	Missense	C506	A169	3	stomach	AGGCGTGCGGTTCTT	Yes
SACS	13	23905608	-1	Missense	T12407	L4136	3	stomach	GAGAAACTTGACAGT	No
TLR4	9	120475898	1	Missense	T1492	L498	3	stomach	GAGAAACTTGACCTT	No
TPTE2	13	19997247	-1	Missense	T1524	I508	3	stomach	GGAAAATTTATCCAC	No
PTPRC	1	198711490	1	Missense	A2691	Q897	3	stomach	TGGTTCAAGTAGAGG	No
OR51A7	11	4928970	1	Missense	T371	L124	3	stomach	CGCTTTCTTGCCATT	No
TTN	2	179472135	-1	Missense	A53280	E17760	3	stomach	GGGTAGAAGTTTTTG	No
RIMS2	8	104898091	1	Missense	A598	S200	3	stomach	GGGACCAAGTTCTTA	No
MAGI2	7	77885499	-1	Missense	T1808	L603	3	stomach	GCTGAACTTATGACC	No
HMGCLL1	6	55406891	-1	Missense	A246	E82	3	stomach	TAGTAGAAGTTGGGC	No
FERD3L	7	19184940	-1	Missense	T46	F16	3	stomach	GCTGGACTTCGTCGC	No
CDH1	16	68844172	1	Missense	G760	D254	3	stomach	GGTAACCGATCAGAA	Yes
ADAMTS16	5	5239336	1	Missense	T2227	S743	3	stomach	GAATAACTCAGCCTG	No
NEFM	8	24771944	1	Missense	C638	A213	3	stomach	GAGGAGGCGTCGCTG	Yes
COL11A1	1	103449740	-1	Missense	T2546	L849	3	stomach	GGAAAACTTGGAGTT	No
MTUS2	13	29601027	1	Missense	A2222	K741	3	stomach	AGTGAAAAGTTTTTG	No
SCARF1	17	1538704	-1	Missense	G1841	R614	3	stomach	CCGCTCCGAAAGCCC	Yes
ZNF492	19	22836737	1	Missense	A50	K17	3	stomach	GCCTCTAAGCCAGAC	No
DLG2	11	83770433	-1	Missense	G844	V282	3	stomach	GTCTATCGTTCGGCT	Yes
MTUS2	13	29933476	1	Missense	C3013	R1005	3	stomach	GGCTGAGCGGCAGCT	Yes
ZC3H4	19	47572412	-1	Missense	G2335	E779	3	stomach	GCAGCAGGAGGAGGA	No
PREX2	8	68930087	1	Missense	T148	L50	3	stomach	GGCATTCTTACACAG	No
LCE1A	1	152800031	1	Missense	A83	K28	3	stomach	ACTCCTAAGTGCCCC	No
CNTNAP5	2	125262020	1	Missense	T1211	L404	3	stomach	GGTCTGCTTCTGTCC	No
UNC13C	15	54306737	1	Missense	T1637	L546	3	stomach	GCTAAACTTAGTCGT	No
HMCN1	1	185958651	1	Missense	A3080	K1027	3	stomach	AGTGCTAAGTTTTCA	No
ZNF236	18	74639294	1	Missense	C4235	T1412	3	stomach	CAGCTCACGGGGGAG	Yes
MANEA	6	96034484	1	Missense	A169	K57	3	stomach	TTTGGGGAAAAATTT	No
MAP2	2	210561456	1	Missense	A4371	E1457	3	stomach	GAGATGAAGTGAGAA	No
CYP7B1	8	65527645	-1	Missense	A995	K332	3	stomach	GGTCAAAAGAAAGGG	No
LIN7A	12	81283099	-1	Missense	A132	E44	3	stomach	CTGGAGAAGTACCAG	No
OR5D16	11	55606243	1	Missense	A16	R6	3	stomach	GACAGAGAGAAATAC	No
BNC2	9	16436469	-1	Missense	A1723	S575	3	stomach	TTATAGAAGTTTACT	No
PTPRJ	11	48146561	1	Missense	G916	A306	3	stomach	CCCCACCGCCCCTGT	Yes
GNG13	16	849007	-1	Missense	G71	R24	3	stomach	TTCCAGCGGGAGATG	Yes
CRB1	1	197390846	1	Missense	T1888	F630	3	stomach	GCTTAACTTCTATAA	No
GPR123	10	134942261	1	Missense	G3086	R1029	3	stomach	GCCAAGCGTGAGGAC	Yes
FLRT2	14	86089507	1	Missense	C1649	A550	3	stomach	GGGGGCGCGGTGATA	Yes
ERBB4	2	212426722	-1	Missense	T2393	L798	3	stomach	ACTCAACTTATGCCC	No
CDH23	10	73405660	1	Missense	G1228	V410	3	stomach	GACCTCCGTCCAGGG	Yes
RIMS1	6	72678732	1	Missense	A211	R71	3	stomach	AACACCAAGAAATGC	No
EYA4	6	133783490	1	Missense	T455	L152	3	stomach	CACATTCTTTCTACA	No
RIMBP2	12	130884319	-1	Missense	T3037	F1013	3	stomach	CTCAAACTTCTTGGA	No
XIRP2	2	168102105	1	Missense	A4203	E1401	3	stomach	TTTCTGAAGAATCAC	No
CDH11	16	65016134	-1	Missense	A1070	K357	3	stomach	GACCCGAAGTTTATC	No
PRAMEF20	1	13744663	1	Missense	A354	E118	3	stomach	GGTCTGAAGCCATGG	No
BTBD11	12	108045467	1	Missense	A3008	K1003	3	stomach	GCTGCTAAGTTTTTC	No
NOVA1	14	26917982	-1	Missense	T707	L236	3	stomach	GTTGAACTTATCATC	No
CSMD3	8	113933896	-1	Missense	A1593	E531	3	stomach	TAGCTGAAGTTTTTG	No
OR4K17	14	20586464	1	Missense	A899	K300	3	stomach	GTAGATAAGTTCCTT	No
KRAS	12	25380283	-1	Missense	G175	A59	3	stomach	CGACACAGCAGGTCA	No
OR5D13	11	55541619	1	Missense	C706	R236	3	central_nervous_system	AAGTGGGCGCCAGAA	Yes
TP53	17	7578550	-1	Missense	C380	S127	3,3	central_nervous_system,lung	CAGTACTCCCCTGCC	No
GABRA6	5	161113291	1	Missense	G94	V32	3	central_nervous_system	AGAAAACGTCAGTCG	Yes
TP53	17	7577096	-1	Missense	A842	D281	3	central_nervous_system	GGGAGAGACCGGCGC	No
PLCG1	20	39802384	1	Missense	G3487	E1163	3	central_nervous_system	GGTGTATGAGGAAGA	No
SEMG1	20	43836216	1	Missense	C278	T93	3	central_nervous_system	CATAAGACGACAAAA	Yes
PTEN	10	89692835	1	Missense	G319	D107	3	central_nervous_system	TTGTGAAGATCTTGA	No
NPTX1	17	78447110	-1	Missense	G787	A263	3	central_nervous_system	GTCCAGCGCCACGCC	Yes
SEMG1	20	43837052	1	Missense	C1114	R372	3	central_nervous_system	ATCCCAACGCAGTAT	Yes
PTEN	10	89711899	1	Missense	C517	R173	3	central_nervous_system	TCAGAGGCGCTATGT	Yes
ABCC10	6	43403588	1	Missense	C1708	R570	3	central_nervous_system	CTTGGACCGGATCCA	Yes
TP53	17	7578280	-1	Missense	C569	P190	3,3	central_nervous_system,lung	CTGGCCCCTCCTCAG	No
EGFR	7	55240690	1	Missense	C1934	S645	3	central_nervous_system	ATCCCGTCCATCGCC	No
TP53	17	7578524	-1	Missense	C406	Q136	3	central_nervous_system	GTTTTGCCAACTGGC	No
ZFP42	4	188924752	1	Missense	C791	T264	3	central_nervous_system	TTGCGTACGCACGTG	Yes
PPM1J	1	113252867	-1	Missense	G1436	R479	3	central_nervous_system	GGCTGGCGTCTCCCC	Yes
TSHZ2	20	51870661	1	Missense	G664	A222	3	central_nervous_system	GTGCAGCGCGGCCTA	Yes
STPG1	1	24727850	-1	Missense	G29	R10	3	central_nervous_system	AATGAACGCACTGGC	Yes
EGFR	7	55221711	1	Missense	G755	R252	3	central_nervous_system	GTCTGCCGCAAATTC	Yes
SCN7A	2	167263066	-1	Missense	G4073	R1358	3	central_nervous_system	ATGCTGCGTCTTGGA	Yes
TP53	17	7577532	-1	Missense	C749	P250	3,3	central_nervous_system,lung	CGGAGGCCCATCCTC	No
TP53	17	7578475	-1	Missense	C455	P152	3,3	central_nervous_system,lung	ACACCCCCGCCCGGC	Yes
TP53	17	7578534	-1	Missense	G396	K132	3,3	central_nervous_system,urinary_tract	TCAACAAGATGTTTT	No
TP53	17	7577138	-1	Missense	G800	R267	3	central_nervous_system	CTGGGACGGAACAGC	Yes
KIF26B	1	245862232	1	Missense	G6071	R2024	3	central_nervous_system	GAACACCGCCAGCAG	Yes
TP53	17	7578458	-1	Missense	C472	R158	3	central_nervous_system	CCGCGTCCGCGCCAT	Yes
ADAMTS12	5	33577084	-1	Missense	C3047	P1016	3	lung	AAAAACCCACCAACA	No
BRINP3	1	190067754	-1	Missense	G1695	L565	3	lung	GCACCTTGGAGCCAG	No
HIST1H3B	6	26032069	-1	Missense	G220	E74	3,3	lung,breast	GGTGCGAGAAATCGC	No
RIT1	1	155874261	-1	Missense	G321	M107	3	lung	AGTATATGAGGGCAG	No
KRTAP6-3	21	31964831	1	Missense	G46	G16	3	lung	TGGCTATGGGTGCTG	No
OR2T4	1	248525769	1	Missense	C887	S296	3	lung	CCCAGCTCCTACCAC	No
POTEG	14	19553711	1	Missense	G295	G99	3	lung	CAAGATGGGCAAGTG	No
TP53	17	7577097	-1	Missense	G841	D281	3	lung	TGGGAGAGACCGGCG	No
ZNF804A	2	185802585	1	Missense	C2462	P821	3	lung	TTCCACCCCGGATTT	No
TP53	17	7577535	-1	Missense	G746	R249	3	lung	AACCGGAGGCCCATC	No
DCDC1	11	30925143	-1	Missense	C4396	R1466	3	lung	TACCTTGCGTGATTT	Yes
BRAF	7	140453155	-1	Missense	G1780	D594	3	lung	AATAGGTGATTTTGG	No
CTNNA2	2	80101245	1	Missense	G629	R210	3	lung	GCCGCCCGAGGGGCT	Yes
CRYGA	2	209025587	-1	Missense	G466	D156	3	lung	GTACCACGACTGGGG	Yes
NLRP3	1	247587725	1	Missense	G980	R327	3	lung	GCCGAGCGGGGAGAC	Yes
MKRN3	15	23811059	1	Missense	C130	P44	3	lung	TGCTGCTCCAGATTC	No
RYR3	15	33954739	1	Missense	C5008	P1670	3	lung	CTCCACCCCTTGCTT	No
NFE2L2	2	178098968	-1	Missense	A77	Q26	3	lung	TGGAGGCAAGATATA	No
RYR2	1	237957224	1	Missense	G13858	G4620	3	lung	ATTTGATGGGCTTTA	No
LRRIQ3	1	74507415	-1	Missense	G1200	L400	3	lung	TACGATTGGAGCGGA	No
KEAP1	19	10610247	-1	Missense	G463	V155	3	lung	CCTCCACGTCATGAA	Yes
OR2T33	1	248436623	-1	Missense	C494	P165	3	lung	AGCTTCCCATATTGT	No
DCAF4L2	8	88885761	-1	Missense	G439	V147	3	lung	GTGCTTCGTGGGACT	Yes
TP53	17	7578467	-1	Missense	A463	T155	3	lung	GCCCGGCACCCGCGT	No
FAM135B	8	139164776	-1	Missense	C1942	L648	3	lung	TTCTACCCTGAGGGA	No
TTN	2	179396364	-1	Missense	C104978	T34993	3	lung	ACCAACACGAGTGGA	Yes
ANO4	12	101442178	1	Missense	G1311	W437	3	lung	CAGTCTGGGGTAAGT	No
CACNG3	16	24373168	1	Missense	G932	R311	3	lung	AACAGGCGCACCACG	Yes
DCAF4L2	8	88885206	-1	Missense	G994	V332	3	lung	GGCGGCCGTGGGCCA	Yes
CDH8	16	61859003	-1	Missense	G748	G250	3	lung	AGATATGGGTGGACA	No
GPC5	13	92380805	1	Missense	G1040	R347	3	lung	TGTGGCCGCCCTGTA	Yes
CHRM3	1	240072343	1	Missense	G1592	W531	3	lung	GGCTACTGGCTGTGC	No
MS4A6A	11	59943065	-1	Missense	G443	G148	3	lung	CTGGTTGGAAGCATT	No
OR51Q1	11	5443647	1	Missense	C217	L73	3	lung	GACGGACCTGGGTCT	No
MFSD2A	1	40432551	1	Missense	G913	G305	3	lung	GAGCCACGGCCCATA	Yes
CDH12	5	22078722	-1	Missense	C64	P22	3	lung	CCTAACACCACTACA	No
KEAP1	19	10602619	-1	Missense	G959	R320	3	lung	CCCTGCCGGGCGCCC	Yes
NFE2L2	2	178098959	-1	Missense	A86	D29	3	lung	GATATAGATCTTGGA	No
KIAA1522	1	33237497	1	Missense	C2717	S906	3	lung	GGGCCATCGGCCCCC	Yes
REG3A	2	79385824	-1	Missense	C148	H50	3	lung	TGGCTCCCACTGCTA	No
SORCS3	10	106974319	1	Missense	G2495	R832	3	lung	GATGGGCGGCTGGTG	Yes
MARCH1	4	164534479	-1	Missense	C229	Q77	3	lung	ATCCACTCAGGACAT	No
CDKN2A.p16INK4a	9	21971107	-1	Missense	A251	D84	3	lung	GTGCACGACGCTGCC	No
PTEN	10	89692902	1	Missense	G386	G129	3	lung	GGAAAGGGACGAACT	No
KEAP1	19	10599915	-1	Missense	G1661	R554	3	lung	CACCGGCGAAGTGCC	Yes
HIST1H2BH	6	26252107	1	Missense	G229	E77	3	lung	CGCCGGCGAGGCTTC	Yes
OR2L13	1	248262995	1	Missense	G318	M106	3	lung	TGACCATGGCGTGTT	No
NAV3	12	78511901	1	Missense	G2864	G955	3	lung	AGCCATGGGGATGCT	No
CSMD3	8	113697836	-1	Missense	C2281	L761	3	lung	GATACATCTTTCTTT	No
ANKS1B	12	99640640	-1	Missense	G1759	D587	3	lung	TGCAGATGACCTCTC	No
BRAF	7	140453193	-1	Missense	A1742	N581	3	lung	ACCTCAGATATATTT	No
SPTA1	1	158627389	-1	Missense	C2683	L895	3	lung	AAATGATCTTGAAGC	No
EGFR	7	55249005	1	Missense	G2303	S768	3	lung	ATGGCCAGCGTGGAC	No
KCNK13	14	90651010	1	Missense	G890	G297	3	lung	GACAGCGGGTGCTGC	No
TNN	1	175066810	1	Missense	G1846	A616	3	lung	CACCAACGCCCCGAC	Yes
KRAS	12	25398262	-1	Missense	G57	L19	3	lung	GTGCCTTGACGATAC	No
HCN1	5	45303823	-1	Missense	G1496	G499	3	lung	CAACCTGGAGATTAT	No
FMN2	1	240371509	1	Missense	C3397	P1133	3	lung	CCCTCCTCCCCCTCT	No
ANKRD30A	10	37482124	1	Missense	G2741	R914	3	lung	CCCTGCAGAATGAAA	No
CDH12	5	21755753	-1	Missense	G1832	G611	3	lung	CCTGTAGGACTTAGC	No
HCN1	5	45396782	-1	Missense	G1042	A348	3	lung	TTCATACGCACTCTT	Yes
CLPB	11	72145270	-1	Missense	C157	R53	3	lung	AATGCCTCGCGGCTG	Yes
EPHB6	7	142564021	1	Missense	G1409	S470	3	lung	GAGCTCAGCCCTGAC	No
OR4N2	14	20295971	1	Missense	C364	R122	3	lung	CTTTGACCGCTACAT	Yes
CNTN5	11	99715950	1	Missense	C533	T178	3	lung	ACCAACACTGTGGGG	No
OR4C46	11	51515322	1	Missense	G41	G14	3	lung	TTGCTGGGGCTTACA	No
KEAP1	19	10602328	-1	Missense	G1250	G417	3	lung	CGCATCGGGGTGGGG	No
ZBTB3	11	62521022	-1	Missense	C265	R89	3	lung	GGCCCATCGGGCTGT	Yes
ZNF33A	10	38344866	1	Missense	G1832	G611	3	lung	CATACAGGGGAGAAA	No
HS6ST3	13	97485168	1	Missense	C1132	Q378	3	lung	CTTCACACAGTTCAA	No
FOLH1	11	49208318	-1	Missense	G517	D173	3	lung	ACAGGGCGATCTAGT	Yes
PCDHGA5	5	140744136	1	Missense	G239	R80	3	lung	AACCCGCGAAGCGGC	Yes
ZNF804B	7	88963284	1	Missense	C988	H330	3	lung	TAACATTCATCTTTC	No
OR2T1	1	248570265	1	Missense	C970	L324	3	lung	CAAAGTCCTCTCTGT	No
TPTE	21	10920092	-1	Missense	C1162	P388	3	lung	AAAAACTCCTTCTCA	No
B2M	15	45003745	1	Missense	A1	M1	3	lung	GGCCGAGATGTCTCG	No
CCDC87	11	66360198	-1	Missense	G289	E97	3	lung	CTGGCGGGAGCCGCC	No
SLC44A5	1	75677224	-1	Missense	G1976	G659	3	lung	ATTTTTGGGTCTTAC	No
CNTNAP4	16	76461394	1	Missense	C445	L149	3	lung	CTATAGACTCCAGCC	No
TP53	17	7576853	-1	Missense	G993	Q331	3	lung	CCCTTCAGGTACTAA	No
TRPS1	8	116632234	-1	Missense	G91	G31	3	lung	AGGCGAGGGCCAGAT	No
RHOA	3	49412884	-1	Missense	G139	E47	3,3	lung,urinary_tract	AGATATCGAGGTGGA	Yes
GMEB2	20	62221554	-1	Missense	C1481	S494	3	lung	CAGGCCTCGCCTGGC	Yes
TP53	17	7578443	-1	Missense	T487	Y163	3	prostate	GGCCATCTACAAGCA	No
SPOP	17	47696431	-1	Missense	G392	W131	3	prostate	AAAGACTGGGGATTC	No
FZD7	2	202899764	1	Missense	G394	E132	3	urinary_tract	GGGCTGCGAGGCGCT	Yes
RALGPS1	9	129958857	1	Missense	G1142	R381	3	urinary_tract	AGCCCCCGAAGGGGC	Yes
SAFB	19	5668276	1	Missense	G2728	D910	3	urinary_tract	GCCCAGCGATGCCCG	Yes
KCNF1	2	11053024	1	Missense	G472	E158	3	urinary_tract	CGCAGCCGAGGGCCG	Yes
UNC93B1	11	67766695	-1	Missense	C635	S212	3	urinary_tract	CGGGGCTCCCACGCG	No
ERBB3	12	56482537	1	Missense	G994	E332	3	urinary_tract	AGCCTGTGAGGGAAC	No
ERCC2	19	45872219	-1	Missense	A215	Y72	3	urinary_tract	CTCATCTACTGCTCA	No
ACPP	3	132071660	1	Missense	G961	E321	3	urinary_tract	GTACTTTGAGAAGGG	No
FAM83H	8	144810877	-1	Missense	G754	E252	3	urinary_tract	GTCCTTTGAGAAGAT	No
GNA13	17	63010911	-1	Missense	A598	R200	3	urinary_tract	GCTTGCCAGAAGACC	No
FGFR3	4	1803564	1	Missense	C742	R248	3	urinary_tract	CACAGAGCGCTCCCC	Yes
KIR3DL1	19	55329821	1	Missense	G122	R41	3	urinary_tract	GTGCCTCGAGGAGGA	Yes
PHLDA3	1	201437671	-1	Missense	G244	E82	3	urinary_tract	GGGCGGCGAGATCGA	Yes
ERBB3	12	56478817	1	Missense	G273	M91	3	urinary_tract	TGGCCATGAATGAAT	No
GAR1	4	110737358	1	Missense	G38	R13	3	urinary_tract	TTTAATCGAGGTGGT	Yes
ALDH16A1	19	49965915	1	Missense	G1001	R334	3	urinary_tract	AGTGGCCGAGGGCTG	Yes
RERE	1	8617577	-1	Missense	G528	K176	3	urinary_tract	AGAGTAAGAGGGACC	No
CUL1	7	148484186	1	Missense	G1453	E485	3	urinary_tract	CGATGCCGAAGCCAG	Yes
FOXQ1	6	1313343	1	Missense	C404	S135	3	urinary_tract	CGCGACTCGGCGGGC	Yes
SF1	11	64537455	-1	Missense	G835	G279	3	urinary_tract	CTTTGTGGGGCTGCT	No
ERCC2	19	45873455	-1	Missense	A41	Y14	3	urinary_tract	TTCCCGTACGACTAC	No
TP53	17	7578449	-1	Missense	G481	A161	3	urinary_tract	CGCCATGGCCATCTA	No
TFPI2	7	93516176	-1	Missense	C664	R222	3	urinary_tract	AAAGCTTCGCTTTGC	Yes
DOCK7	1	63113920	-1	Missense	G589	D197	3	urinary_tract	TATCTTTGACTTGAA	No
PCF11	11	82877677	1	Missense	G1738	E580	3	urinary_tract	AGGCACTGAACCAAA	No
COPZ2	17	46111232	-1	Missense	G259	E87	3	urinary_tract	CCGGACTGAGAGTAA	No
ZFP36L2	2	43452198	-1	Missense	G745	E249	3	urinary_tract	CCCGCGGGAGCCGCG	No
CSPG5	3	47619161	-1	Missense	G355	D119	3	urinary_tract	CAGCGGCGATGCCCA	Yes
DUSP14	17	35872428	1	Missense	G54	M18	3	urinary_tract	CTCGGATGATTTCCG	No
MYO1F	19	8617036	-1	Missense	G517	E173	3	urinary_tract	GTACTTTGAGATCCA	No
UNC13D	17	73824970	-1	Missense	G3049	E1017	3	urinary_tract	GGAAGGCGAGGCCTT	Yes
FURIN	15	91424800	1	Missense	C2077	R693	3	urinary_tract	GCCACCTCGGCTGCC	Yes
GNA13	17	63010910	-1	Missense	G599	R200	3	urinary_tract	CTTGCCAGAAGACCC	No
SHANK1	19	51205763	-1	Missense	G1708	E570	3	urinary_tract	CCAAGCCGAGGGGGA	Yes
CYR61	1	86048116	1	Missense	C652	R218	3	urinary_tract	GGAGCCTCGCATCCT	Yes
C18orf8	18	21110004	1	Missense	G1507	E503	3	urinary_tract	CCTACATGAACTTGT	No
HRAS	11	533875	-1	Missense	C181	Q61	3	urinary_tract	CGCCGGCCAGGAGGA	No
HIST1H2AJ	6	27782430	-1	Missense	G89	R30	3	urinary_tract	GTAGGCCGAGTGCAT	Yes
CLASP2	3	33614798	-1	Missense	G2530	D844	3	urinary_tract	TTCAGATGATGACGC	No
DNAAF2	14	50101108	-1	Missense	C760	R254	3	urinary_tract	CGAGCCTCGCTACAG	Yes
VGF	7	100806828	-1	Missense	G1297	E433	3	urinary_tract	GGAGGCCGAGGGGAC	Yes
ZBTB7B	1	154988705	1	Missense	G1266	K422	3	urinary_tract	ACGACAAGCTGAAGA	No
NAALADL1	11	64822077	-1	Missense	G737	R246	3	urinary_tract	GTGGAGCGAGGCTCC	Yes
CD2BP2	16	30365287	-1	Missense	G310	D104	3	urinary_tract	TGATGCCGATGGCAA	Yes
RP11-512M8.5	12	122750907	-1	Missense	G49	E17	3	urinary_tract	GTTGCGCGAGGCGGT	Yes
VPS33A	12	122750907	-1	Missense	G49	E17	3	urinary_tract	GTTGCGCGAGGCGGT	Yes
ERCC2	19	45872380	-1	Missense	C131	S44	3	urinary_tract	ATGCCCTCAGGCACC	No
PIK3CA	3	178951957	1	Missense	G3012	M1004	3	breast	TCTCAATGATGCTTG	No
CDH1	16	68844139	1	Missense	G727	E243	3	breast	TGCAGTTGAGGATCC	No
ERBB3	12	56492633	1	Missense	A2783	E928	3	breast	AAGGGGGAGCGGTTG	No
CDC42BPA	1	227288919	-1	Missense	C2023	P675	3	breast	TTACTCACCAGGAGT	No
KIF1B	1	10412697	1	Missense	C3958	R1320	3	breast	TCGTATTCGGAATAA	Yes
FOXA1	14	38061240	-1	Missense	C749	S250	3	breast	CCGGACTCCGGCAAC	No
FOXA1	14	38061312	-1	Missense	A677	D226	3	breast	TTCAATGACTGCTTC	No
ERBB2	17	37880261	1	Missense	G2305	D769	3	breast	AATCTTAGACGTAAG	No
NUP93	16	56782199	1	Missense	G40	E14	3	breast	GCAAGCTGAACAGCT	No
MET	7	116417457	1	Missense	G3328	V1110	3	kidney	TGGTTGTGTATATCA	No
PCF11	11	82877690	1	Missense	A1751	N584	3	kidney	AAGGAGAATGTAGAA	No
ZFAND2B	2	220072989	1	Missense	T446	I149	3	kidney	GCTGCCATCTCCAGA	No
MET	7	116417463	1	Missense	C3334	H1112	3	kidney	TGTATATCATGGGAC	No
MET	7	116415115	1	Missense	T3263	V1088	3	kidney	CATGTAGTGATTGGG	No
VHL	3	10191570	1	Missense	T563	L188	3	kidney	GAAGATCTGGAAGAC	No
MTOR	1	11188164	-1	Missense	C5930	T1977	3	kidney	CCACTGACAGTGGCT	No
VHL	3	10191513	1	Missense	T506	L169	3	kidney	CGGAGCCTAGTCAAG	No
VHL	3	10188240	1	Missense	T383	L128	3	kidney	GATGGGCTTCTGGTT	No
ATP1A2	1	160093040	1	Missense	G215	R72	3	kidney	CTGGCTCGAGATGGG	Yes
VHL	3	10183763	1	Missense	A232	N78	3	kidney	CTTCTGCAATCGCAG	No
VHL	3	10188245	1	Missense	G388	V130	3	kidney	GCTTCTGGTTAACCA	No
VHL	3	10188309	1	Missense	T452	I151	3	kidney	GCCAATATCACACTG	No

## Sheet: CDN.Missense.gnomad
Chr	Start	End	Ref	Alt	Func.refGene	Gene.refGene	GeneDetail.refGene	ExonicFunc.refGene	AAChange.refGene	AF	AF_popmax	AF_male	AF_female	AF_raw	AF_afr	AF_sas	AF_amr	AF_eas	AF_nfe	AF_fin	AF_asj	AF_oth	non_topmed_AF_popmax	non_neuro_AF_popmax	non_cancer_AF_popmax	controls_AF_popmax	AF	AF_popmax	AF_male	AF_female	AF_raw	AF_afr	AF_sas	AF_amr	AF_eas	AF_nfe	AF_fin	AF_asj	AF_oth	non_topmed_AF_popmax	non_neuro_AF_popmax	non_cancer_AF_popmax	controls_AF_popmax	Otherinfo1	Otherinfo2
2	209113112	209113112	C	T	exonic	IDH1	-	nonsynonymous SNV	IDH1:NM_001282386:exon4:c.395G>A:p.R132H,IDH1:NM_001282387:exon4:c.395G>A:p.R132H,IDH1:NM_005896:exon4:c.395G>A:p.R132H	0	.	0	0	3.976e-06	0	0	0	0	0	0	0	0	.	.	.	.	-	-	-	-	-	-	-	-	-	-	-	-	-	-	-	-	-	central_nervous_system	378
17	7577121	7577121	G	A	exonic	TP53	-	nonsynonymous SNV	TP53:NM_001126115:exon4:c.421C>T:p.R141C,TP53:NM_001126116:exon4:c.421C>T:p.R141C,TP53:NM_001126117:exon4:c.421C>T:p.R141C,TP53:NM_001276697:exon4:c.340C>T:p.R114C,TP53:NM_001276698:exon4:c.340C>T:p.R114C,TP53:NM_001276699:exon4:c.340C>T:p.R114C,TP53:NM_001126118:exon7:c.700C>T:p.R234C,TP53:NM_000546:exon8:c.817C>T:p.R273C,TP53:NM_001126112:exon8:c.817C>T:p.R273C,TP53:NM_001126113:exon8:c.817C>T:…	1.196e-05	5.443e-05	1.475e-05	8.679e-06	1.193e-05	0	0	0	5.443e-05	8.818e-06	4.631e-05	0	0	5.444e-05	7.459e-05	5.658e-05	.	0	.	0	0	3.183e-05	0	.	0	0	0	0	0	0	.	.	.	.	central_nervous_system	50
2	209113113	209113113	G	A	exonic	IDH1	-	nonsynonymous SNV	IDH1:NM_001282386:exon4:c.394C>T:p.R132C,IDH1:NM_001282387:exon4:c.394C>T:p.R132C,IDH1:NM_005896:exon4:c.394C>T:p.R132C	0	.	0	0	3.976e-06	0	0	0	0	0	0	0	0	.	.	.	.	-	-	-	-	-	-	-	-	-	-	-	-	-	-	-	-	-	central_nervous_system	18
2	209113113	209113113	G	C	exonic	IDH1	-	nonsynonymous SNV	IDH1:NM_001282386:exon4:c.394C>G:p.R132G,IDH1:NM_001282387:exon4:c.394C>G:p.R132G,IDH1:NM_005896:exon4:c.394C>G:p.R132G	0	.	0	0	3.976e-06	0	0	0	0	0	0	0	0	.	.	.	.	-	-	-	-	-	-	-	-	-	-	-	-	-	-	-	-	-	central_nervous_system	12
2	209113113	209113113	G	T	exonic	IDH1	-	nonsynonymous SNV	IDH1:NM_001282386:exon4:c.394C>A:p.R132S,IDH1:NM_001282387:exon4:c.394C>A:p.R132S,IDH1:NM_005896:exon4:c.394C>A:p.R132S	-	-	-	-	-	-	-	-	-	-	-	-	-	-	-	-	-	-	-	-	-	-	-	-	-	-	-	-	-	-	-	-	-	-	central_nervous_system	9
7	55221822	55221822	C	T	exonic	EGFR	-	nonsynonymous SNV	EGFR:NM_001346897:exon6:c.731C>T:p.A244V,EGFR:NM_001346899:exon6:c.731C>T:p.A244V,EGFR:NM_001346898:exon7:c.866C>T:p.A289V,EGFR:NM_001346900:exon7:c.707C>T:p.A236V,EGFR:NM_005228:exon7:c.866C>T:p.A289V,EGFR:NM_201282:exon7:c.866C>T:p.A289V,EGFR:NM_201283:exon7:c.866C>T:p.A289V,EGFR:NM_201284:exon7:c.866C>T:p.A289V	-	-	-	-	-	-	-	-	-	-	-	-	-	-	-	-	-	-	-	-	-	-	-	-	-	-	-	-	-	-	-	-	-	-	central_nervous_system	19
7	55221822	55221822	C	A	exonic	EGFR	-	nonsynonymous SNV	EGFR:NM_001346897:exon6:c.731C>A:p.A244D,EGFR:NM_001346899:exon6:c.731C>A:p.A244D,EGFR:NM_001346898:exon7:c.866C>A:p.A289D,EGFR:NM_001346900:exon7:c.707C>A:p.A236D,EGFR:NM_005228:exon7:c.866C>A:p.A289D,EGFR:NM_201282:exon7:c.866C>A:p.A289D,EGFR:NM_201283:exon7:c.866C>A:p.A289D,EGFR:NM_201284:exon7:c.866C>A:p.A289D	-	-	-	-	-	-	-	-	-	-	-	-	-	-	-	-	-	-	-	-	-	-	-	-	-	-	-	-	-	-	-	-	-	-	central_nervous_system	5
7	55233043	55233043	G	T	exonic	EGFR	-	nonsynonymous SNV	EGFR:NM_001346941:exon9:c.992G>T:p.G331V,EGFR:NM_001346897:exon14:c.1658G>T:p.G553V,EGFR:NM_001346899:exon14:c.1658G>T:p.G553V,EGFR:NM_001346898:exon15:c.1793G>T:p.G598V,EGFR:NM_001346900:exon15:c.1634G>T:p.G545V,EGFR:NM_005228:exon15:c.1793G>T:p.G598V,EGFR:NM_201282:exon15:c.1793G>T:p.G598V,EGFR:NM_201284:exon15:c.1793G>T:p.G598V	3.977e-06	8.793e-06	0	8.655e-06	3.976e-06	0	0	0	0	8.793e-06	0	0	0	8.958e-06	1.117e-05	.	.	-	-	-	-	-	-	-	-	-	-	-	-	-	-	-	-	-	central_nervous_system	17
7	55233043	55233043	G	C	exonic	EGFR	-	nonsynonymous SNV	EGFR:NM_001346941:exon9:c.992G>C:p.G331A,EGFR:NM_001346897:exon14:c.1658G>C:p.G553A,EGFR:NM_001346899:exon14:c.1658G>C:p.G553A,EGFR:NM_001346898:exon15:c.1793G>C:p.G598A,EGFR:NM_001346900:exon15:c.1634G>C:p.G545A,EGFR:NM_005228:exon15:c.1793G>C:p.G598A,EGFR:NM_201282:exon15:c.1793G>C:p.G598A,EGFR:NM_201284:exon15:c.1793G>C:p.G598A	-	-	-	-	-	-	-	-	-	-	-	-	-	-	-	-	-	-	-	-	-	-	-	-	-	-	-	-	-	-	-	-	-	-	central_nervous_system	1
17	7577120	7577120	C	T	exonic	TP53	-	nonsynonymous SNV	TP53:NM_001126115:exon4:c.422G>A:p.R141H,TP53:NM_001126116:exon4:c.422G>A:p.R141H,TP53:NM_001126117:exon4:c.422G>A:p.R141H,TP53:NM_001276697:exon4:c.341G>A:p.R114H,TP53:NM_001276698:exon4:c.341G>A:p.R114H,TP53:NM_001276699:exon4:c.341G>A:p.R114H,TP53:NM_001126118:exon7:c.701G>A:p.R234H,TP53:NM_000546:exon8:c.818G>A:p.R273H,TP53:NM_001126112:exon8:c.818G>A:p.R273H,TP53:NM_001126113:exon8:c.818G>A:…	1.593e-05	2.643e-05	2.21e-05	8.671e-06	3.976e-05	0	0	0	0	2.643e-05	0	9.929e-05	0	2.692e-05	3.355e-05	2.925e-05	7.024e-05	-	-	-	-	-	-	-	-	-	-	-	-	-	-	-	-	-	central_nervous_system	13
17	7577120	7577120	C	A	exonic	TP53	-	nonsynonymous SNV	TP53:NM_001126115:exon4:c.422G>T:p.R141L,TP53:NM_001126116:exon4:c.422G>T:p.R141L,TP53:NM_001126117:exon4:c.422G>T:p.R141L,TP53:NM_001276697:exon4:c.341G>T:p.R114L,TP53:NM_001276698:exon4:c.341G>T:p.R114L,TP53:NM_001276699:exon4:c.341G>T:p.R114L,TP53:NM_001126118:exon7:c.701G>T:p.R234L,TP53:NM_000546:exon8:c.818G>T:p.R273L,TP53:NM_001126112:exon8:c.818G>T:p.R273L,TP53:NM_001126113:exon8:c.818G>T:…	3.983e-06	8.809e-06	7.368e-06	0	3.976e-06	0	0	0	0	8.809e-06	0	0	0	8.974e-06	1.118e-05	.	.	-	-	-	-	-	-	-	-	-	-	-	-	-	-	-	-	-	central_nervous_system	4
17	7577538	7577538	C	T	exonic	TP53	-	nonsynonymous SNV	TP53:NM_001126115:exon3:c.347G>A:p.R116Q,TP53:NM_001126116:exon3:c.347G>A:p.R116Q,TP53:NM_001126117:exon3:c.347G>A:p.R116Q,TP53:NM_001276697:exon3:c.266G>A:p.R89Q,TP53:NM_001276698:exon3:c.266G>A:p.R89Q,TP53:NM_001276699:exon3:c.266G>A:p.R89Q,TP53:NM_001126118:exon6:c.626G>A:p.R209Q,TP53:NM_000546:exon7:c.743G>A:p.R248Q,TP53:NM_001126112:exon7:c.743G>A:p.R248Q,TP53:NM_001126113:exon7:c.743G>A:p.R…	1.193e-05	2.637e-05	7.358e-06	1.731e-05	2.386e-05	0	0	0	0	2.637e-05	0	0	0	2.687e-05	2.233e-05	1.947e-05	2.338e-05	-	-	-	-	-	-	-	-	-	-	-	-	-	-	-	-	-	central_nervous_system	16
17	7578406	7578406	C	T	exonic	TP53	-	nonsynonymous SNV	TP53:NM_001126115:exon1:c.128G>A:p.R43H,TP53:NM_001126116:exon1:c.128G>A:p.R43H,TP53:NM_001126117:exon1:c.128G>A:p.R43H,TP53:NM_001276697:exon1:c.47G>A:p.R16H,TP53:NM_001276698:exon1:c.47G>A:p.R16H,TP53:NM_001276699:exon1:c.47G>A:p.R16H,TP53:NM_001126118:exon4:c.407G>A:p.R136H,TP53:NM_000546:exon5:c.524G>A:p.R175H,TP53:NM_001126112:exon5:c.524G>A:p.R175H,TP53:NM_001126113:exon5:c.524G>A:p.R175H,T…	3.98e-06	8.803e-06	7.362e-06	0	3.976e-06	0	0	0	0	8.803e-06	0	0	0	8.968e-06	1.118e-05	9.747e-06	.	-	-	-	-	-	-	-	-	-	-	-	-	-	-	-	-	-	central_nervous_system	16
17	7578190	7578190	T	C	exonic	TP53	-	nonsynonymous SNV	TP53:NM_001126115:exon2:c.263A>G:p.Y88C,TP53:NM_001126116:exon2:c.263A>G:p.Y88C,TP53:NM_001126117:exon2:c.263A>G:p.Y88C,TP53:NM_001276697:exon2:c.182A>G:p.Y61C,TP53:NM_001276698:exon2:c.182A>G:p.Y61C,TP53:NM_001276699:exon2:c.182A>G:p.Y61C,TP53:NM_001126118:exon5:c.542A>G:p.Y181C,TP53:NM_000546:exon6:c.659A>G:p.Y220C,TP53:NM_001126112:exon6:c.659A>G:p.Y220C,TP53:NM_001126113:exon6:c.659A>G:p.Y220…	7.955e-06	1.759e-05	7.359e-06	8.656e-06	1.988e-05	0	0	0	0	1.759e-05	0	0	0	1.792e-05	1.117e-05	1.947e-05	2.339e-05	-	-	-	-	-	-	-	-	-	-	-	-	-	-	-	-	-	central_nervous_system	15
15	90631838	90631838	C	T	exonic	IDH2	-	nonsynonymous SNV	IDH2:NM_001290114:exon2:c.125G>A:p.R42K,IDH2:NM_001289910:exon4:c.359G>A:p.R120K,IDH2:NM_002168:exon4:c.515G>A:p.R172K	-	-	-	-	-	-	-	-	-	-	-	-	-	-	-	-	-	-	-	-	-	-	-	-	-	-	-	-	-	-	-	-	-	-	central_nervous_system	12
15	90631838	90631838	C	A	exonic	IDH2	-	nonsynonymous SNV	IDH2:NM_001290114:exon2:c.125G>T:p.R42M,IDH2:NM_001289910:exon4:c.359G>T:p.R120M,IDH2:NM_002168:exon4:c.515G>T:p.R172M	-	-	-	-	-	-	-	-	-	-	-	-	-	-	-	-	-	-	-	-	-	-	-	-	-	-	-	-	-	-	-	-	-	-	central_nervous_system	3
17	7577094	7577094	G	A	exonic	TP53	-	nonsynonymous SNV	TP53:NM_001126115:exon4:c.448C>T:p.R150W,TP53:NM_001126116:exon4:c.448C>T:p.R150W,TP53:NM_001126117:exon4:c.448C>T:p.R150W,TP53:NM_001276697:exon4:c.367C>T:p.R123W,TP53:NM_001276698:exon4:c.367C>T:p.R123W,TP53:NM_001276699:exon4:c.367C>T:p.R123W,TP53:NM_001126118:exon7:c.727C>T:p.R243W,TP53:NM_000546:exon8:c.844C>T:p.R282W,TP53:NM_001126112:exon8:c.844C>T:p.R282W,TP53:NM_001126113:exon8:c.844C>T:…	3.978e-06	8.793e-06	0	8.655e-06	7.952e-06	0	0	0	0	8.793e-06	0	0	0	8.957e-06	1.117e-05	.	.	-	-	-	-	-	-	-	-	-	-	-	-	-	-	-	-	-	central_nervous_system	11
17	7578394	7578394	T	C	exonic	TP53	-	nonsynonymous SNV	TP53:NM_001126115:exon1:c.140A>G:p.H47R,TP53:NM_001126116:exon1:c.140A>G:p.H47R,TP53:NM_001126117:exon1:c.140A>G:p.H47R,TP53:NM_001276697:exon1:c.59A>G:p.H20R,TP53:NM_001276698:exon1:c.59A>G:p.H20R,TP53:NM_001276699:exon1:c.59A>G:p.H20R,TP53:NM_001126118:exon4:c.419A>G:p.H140R,TP53:NM_000546:exon5:c.536A>G:p.H179R,TP53:NM_001126112:exon5:c.536A>G:p.H179R,TP53:NM_001126113:exon5:c.536A>G:p.H179R,T…	3.979e-06	.	7.361e-06	0	3.976e-06	0	0	0	0	0	0	9.927e-05	0	.	.	.	.	-	-	-	-	-	-	-	-	-	-	-	-	-	-	-	-	-	central_nervous_system	10
17	7577539	7577539	G	A	exonic	TP53	-	nonsynonymous SNV	TP53:NM_001126115:exon3:c.346C>T:p.R116W,TP53:NM_001126116:exon3:c.346C>T:p.R116W,TP53:NM_001126117:exon3:c.346C>T:p.R116W,TP53:NM_001276697:exon3:c.265C>T:p.R89W,TP53:NM_001276698:exon3:c.265C>T:p.R89W,TP53:NM_001276699:exon3:c.265C>T:p.R89W,TP53:NM_001126118:exon6:c.625C>T:p.R209W,TP53:NM_000546:exon7:c.742C>T:p.R248W,TP53:NM_001126112:exon7:c.742C>T:p.R248W,TP53:NM_001126113:exon7:c.742C>T:p.R…	3.977e-06	8.791e-06	7.358e-06	0	1.193e-05	0	0	0	0	8.791e-06	0	0	0	8.955e-06	1.117e-05	9.733e-06	2.338e-05	-	-	-	-	-	-	-	-	-	-	-	-	-	-	-	-	-	central_nervous_system	10
19	42791757	42791757	C	T	exonic	CIC	-	nonsynonymous SNV	CIC:NM_015125:exon5:c.643C>T:p.R215W,CIC:NM_001304815:exon6:c.3370C>T:p.R1124W	-	-	-	-	-	-	-	-	-	-	-	-	-	-	-	-	-	-	-	-	-	-	-	-	-	-	-	-	-	-	-	-	-	-	central_nervous_system	10
5	67589138	67589138	G	A	exonic	PIK3R1	-	nonsynonymous SNV	PIK3R1:NM_001242466:exon3:c.37G>A:p.G13R,PIK3R1:NM_181504:exon4:c.316G>A:p.G106R,PIK3R1:NM_181524:exon4:c.226G>A:p.G76R,PIK3R1:NM_181523:exon10:c.1126G>A:p.G376R	-	-	-	-	-	-	-	-	-	-	-	-	-	-	-	-	-	-	-	-	-	-	-	-	-	-	-	-	-	-	-	-	-	-	central_nervous_system	7
17	7577548	7577548	C	T	exonic	TP53	-	nonsynonymous SNV	TP53:NM_001126115:exon3:c.337G>A:p.G113S,TP53:NM_001126116:exon3:c.337G>A:p.G113S,TP53:NM_001126117:exon3:c.337G>A:p.G113S,TP53:NM_001276697:exon3:c.256G>A:p.G86S,TP53:NM_001276698:exon3:c.256G>A:p.G86S,TP53:NM_001276699:exon3:c.256G>A:p.G86S,TP53:NM_001126118:exon6:c.616G>A:p.G206S,TP53:NM_000546:exon7:c.733G>A:p.G245S,TP53:NM_001126112:exon7:c.733G>A:p.G245S,TP53:NM_001126113:exon7:c.733G>A:p.G…	0	.	0	0	7.952e-06	0	0	0	0	0	0	0	0	.	.	.	.	3.193e-05	0.0001	5.733e-05	0	3.183e-05	0.0001	.	0	0	0	0	0	0	0.0001	.	.	.	central_nervous_system	7
3	178952085	178952085	A	G	exonic	PIK3CA	-	nonsynonymous SNV	PIK3CA:NM_006218:exon21:c.3140A>G:p.H1047R	4.028e-06	8.91e-06	0	8.802e-06	3.998e-06	0	0	0	0	8.91e-06	0	0	0	9.079e-06	1.123e-05	.	.	-	-	-	-	-	-	-	-	-	-	-	-	-	-	-	-	-	central_nervous_system	6
3	178952085	178952085	A	T	exonic	PIK3CA	-	nonsynonymous SNV	PIK3CA:NM_006218:exon21:c.3140A>T:p.H1047L	4.028e-06	8.91e-06	0	8.802e-06	3.998e-06	0	0	0	0	8.91e-06	0	0	0	9.079e-06	1.123e-05	.	.	-	-	-	-	-	-	-	-	-	-	-	-	-	-	-	-	-	central_nervous_system	1
17	7578203	7578203	C	T	exonic	TP53	-	nonsynonymous SNV	TP53:NM_001126115:exon2:c.250G>A:p.V84M,TP53:NM_001126116:exon2:c.250G>A:p.V84M,TP53:NM_001126117:exon2:c.250G>A:p.V84M,TP53:NM_001276697:exon2:c.169G>A:p.V57M,TP53:NM_001276698:exon2:c.169G>A:p.V57M,TP53:NM_001276699:exon2:c.169G>A:p.V57M,TP53:NM_001126118:exon5:c.529G>A:p.V177M,TP53:NM_000546:exon6:c.646G>A:p.V216M,TP53:NM_001126112:exon6:c.646G>A:p.V216M,TP53:NM_001126113:exon6:c.646G>A:p.V216…	-	-	-	-	-	-	-	-	-	-	-	-	-	-	-	-	-	-	-	-	-	-	-	-	-	-	-	-	-	-	-	-	-	-	central_nervous_system	5
17	7578203	7578203	C	A	exonic	TP53	-	nonsynonymous SNV	TP53:NM_001126115:exon2:c.250G>T:p.V84L,TP53:NM_001126116:exon2:c.250G>T:p.V84L,TP53:NM_001126117:exon2:c.250G>T:p.V84L,TP53:NM_001276697:exon2:c.169G>T:p.V57L,TP53:NM_001276698:exon2:c.169G>T:p.V57L,TP53:NM_001276699:exon2:c.169G>T:p.V57L,TP53:NM_001126118:exon5:c.529G>T:p.V177L,TP53:NM_000546:exon6:c.646G>T:p.V216L,TP53:NM_001126112:exon6:c.646G>T:p.V216L,TP53:NM_001126113:exon6:c.646G>T:p.V216…	-	-	-	-	-	-	-	-	-	-	-	-	-	-	-	-	-	-	-	-	-	-	-	-	-	-	-	-	-	-	-	-	-	-	central_nervous_system	1
7	55220274	55220274	C	T	exonic	EGFR	-	nonsynonymous SNV	EGFR:NM_001346897:exon5:c.529C>T:p.R177C,EGFR:NM_001346899:exon5:c.529C>T:p.R177C,EGFR:NM_001346898:exon6:c.664C>T:p.R222C,EGFR:NM_001346900:exon6:c.505C>T:p.R169C,EGFR:NM_005228:exon6:c.664C>T:p.R222C,EGFR:NM_201282:exon6:c.664C>T:p.R222C,EGFR:NM_201283:exon6:c.664C>T:p.R222C,EGFR:NM_201284:exon6:c.664C>T:p.R222C	-	-	-	-	-	-	-	-	-	-	-	-	-	-	-	-	-	-	-	-	-	-	-	-	-	-	-	-	-	-	-	-	-	-	central_nervous_system	6
7	55211080	55211080	G	A	exonic	EGFR	-	nonsynonymous SNV	EGFR:NM_001346897:exon3:c.323G>A:p.R108K,EGFR:NM_001346898:exon3:c.323G>A:p.R108K,EGFR:NM_001346899:exon3:c.323G>A:p.R108K,EGFR:NM_001346900:exon3:c.164G>A:p.R55K,EGFR:NM_005228:exon3:c.323G>A:p.R108K,EGFR:NM_201282:exon3:c.323G>A:p.R108K,EGFR:NM_201283:exon3:c.323G>A:p.R108K,EGFR:NM_201284:exon3:c.323G>A:p.R108K	-	-	-	-	-	-	-	-	-	-	-	-	-	-	-	-	-	-	-	-	-	-	-	-	-	-	-	-	-	-	-	-	-	-	central_nervous_system	6
3	178952072	178952072	A	G	exonic	PIK3CA	-	nonsynonymous SNV	PIK3CA:NM_006218:exon21:c.3127A>G:p.M1043V	-	-	-	-	-	-	-	-	-	-	-	-	-	-	-	-	-	-	-	-	-	-	-	-	-	-	-	-	-	-	-	-	-	-	central_nervous_system	6
7	55249022	55249022	G	A	exonic	EGFR	-	nonsynonymous SNV	EGFR:NM_001346941:exon14:c.1519G>A:p.V507M,EGFR:NM_001346897:exon19:c.2185G>A:p.V729M,EGFR:NM_001346899:exon19:c.2185G>A:p.V729M,EGFR:NM_001346898:exon20:c.2320G>A:p.V774M,EGFR:NM_001346900:exon20:c.2161G>A:p.V721M,EGFR:NM_005228:exon20:c.2320G>A:p.V774M	3.979e-06	8.802e-06	0	8.664e-06	3.976e-06	0	0	0	0	8.802e-06	0	0	0	8.966e-06	1.118e-05	9.74e-06	.	-	-	-	-	-	-	-	-	-	-	-	-	-	-	-	-	-	central_nervous_system	6
17	7577568	7577568	C	A	exonic	TP53	-	nonsynonymous SNV	TP53:NM_001126115:exon3:c.317G>T:p.C106F,TP53:NM_001126116:exon3:c.317G>T:p.C106F,TP53:NM_001126117:exon3:c.317G>T:p.C106F,TP53:NM_001276697:exon3:c.236G>T:p.C79F,TP53:NM_001276698:exon3:c.236G>T:p.C79F,TP53:NM_001276699:exon3:c.236G>T:p.C79F,TP53:NM_001126118:exon6:c.596G>T:p.C199F,TP53:NM_000546:exon7:c.713G>T:p.C238F,TP53:NM_001126112:exon7:c.713G>T:p.C238F,TP53:NM_001126113:exon7:c.713G>T:p.C…	-	-	-	-	-	-	-	-	-	-	-	-	-	-	-	-	-	-	-	-	-	-	-	-	-	-	-	-	-	-	-	-	-	-	central_nervous_system	3
17	7577568	7577568	C	T	exonic	TP53	-	nonsynonymous SNV	TP53:NM_001126115:exon3:c.317G>A:p.C106Y,TP53:NM_001126116:exon3:c.317G>A:p.C106Y,TP53:NM_001126117:exon3:c.317G>A:p.C106Y,TP53:NM_001276697:exon3:c.236G>A:p.C79Y,TP53:NM_001276698:exon3:c.236G>A:p.C79Y,TP53:NM_001276699:exon3:c.236G>A:p.C79Y,TP53:NM_001126118:exon6:c.596G>A:p.C199Y,TP53:NM_000546:exon7:c.713G>A:p.C238Y,TP53:NM_001126112:exon7:c.713G>A:p.C238Y,TP53:NM_001126113:exon7:c.713G>A:p.C…	7.953e-06	1.758e-05	7.358e-06	8.653e-06	1.59e-05	0	0	0	0	1.758e-05	0	0	0	8.955e-06	2.233e-05	1.947e-05	4.676e-05	-	-	-	-	-	-	-	-	-	-	-	-	-	-	-	-	-	central_nervous_system	3
19	42791715	42791715	C	T	exonic	CIC	-	nonsynonymous SNV	CIC:NM_015125:exon5:c.601C>T:p.R201W,CIC:NM_001304815:exon6:c.3328C>T:p.R1110W	0	.	0	0	3.976e-06	0	0	0	0	0	0	0	0	.	.	.	.	-	-	-	-	-	-	-	-	-	-	-	-	-	-	-	-	-	central_nervous_system	6
17	7578457	7578457	C	T	exonic	TP53	-	nonsynonymous SNV	TP53:NM_001126115:exon1:c.77G>A:p.R26H,TP53:NM_001126116:exon1:c.77G>A:p.R26H,TP53:NM_001126117:exon1:c.77G>A:p.R26H,TP53:NM_001126118:exon4:c.356G>A:p.R119H,TP53:NM_000546:exon5:c.473G>A:p.R158H,TP53:NM_001126112:exon5:c.473G>A:p.R158H,TP53:NM_001126113:exon5:c.473G>A:p.R158H,TP53:NM_001126114:exon5:c.473G>A:p.R158H,TP53:NM_001276695:exon5:c.356G>A:p.R119H,TP53:NM_001276696:exon5:c.356G>A:p.R119…	3.98e-06	.	7.361e-06	0	3.976e-06	0	0	0	0	0	0	9.93e-05	0	.	.	.	.	-	-	-	-	-	-	-	-	-	-	-	-	-	-	-	-	-	central_nervous_system	4
17	7578457	7578457	C	G	exonic	TP53	-	nonsynonymous SNV	TP53:NM_001126115:exon1:c.77G>C:p.R26P,TP53:NM_001126116:exon1:c.77G>C:p.R26P,TP53:NM_001126117:exon1:c.77G>C:p.R26P,TP53:NM_001126118:exon4:c.356G>C:p.R119P,TP53:NM_000546:exon5:c.473G>C:p.R158P,TP53:NM_001126112:exon5:c.473G>C:p.R158P,TP53:NM_001126113:exon5:c.473G>C:p.R158P,TP53:NM_001126114:exon5:c.473G>C:p.R158P,TP53:NM_001276695:exon5:c.356G>C:p.R119P,TP53:NM_001276696:exon5:c.356G>C:p.R119…	-	-	-	-	-	-	-	-	-	-	-	-	-	-	-	-	-	-	-	-	-	-	-	-	-	-	-	-	-	-	-	-	-	-	central_nervous_system	1
7	140453136	140453136	A	T	exonic	BRAF	-	nonsynonymous SNV	BRAF:NM_001354609:exon15:c.1799T>A:p.V600E,BRAF:NM_004333:exon15:c.1799T>A:p.V600E,BRAF:NM_001374244:exon16:c.1919T>A:p.V640E,BRAF:NM_001374258:exon16:c.1919T>A:p.V640E	3.98e-06	3.267e-05	7.364e-06	0	1.193e-05	0	3.267e-05	0	0	0	0	0	0	3.267e-05	3.268e-05	3.276e-05	6.373e-05	-	-	-	-	-	-	-	-	-	-	-	-	-	-	-	-	-	central_nervous_system	5
7	55210075	55210075	T	G	exonic	EGFR	-	nonsynonymous SNV	EGFR:NM_001346897:exon2:c.185T>G:p.L62R,EGFR:NM_001346898:exon2:c.185T>G:p.L62R,EGFR:NM_001346899:exon2:c.185T>G:p.L62R,EGFR:NM_001346900:exon2:c.26T>G:p.L9R,EGFR:NM_005228:exon2:c.185T>G:p.L62R,EGFR:NM_201282:exon2:c.185T>G:p.L62R,EGFR:NM_201283:exon2:c.185T>G:p.L62R,EGFR:NM_201284:exon2:c.185T>G:p.L62R	-	-	-	-	-	-	-	-	-	-	-	-	-	-	-	-	-	-	-	-	-	-	-	-	-	-	-	-	-	-	-	-	-	-	central_nervous_system	5
5	1238077	1238077	A	C	exonic	SLC6A18	-	nonsynonymous SNV	SLC6A18:NM_182632:exon5:c.634A>C:p.T212P	0.0002	0.0014	0.0002	0.0003	0.001	0.0014	0	2.893e-05	0	0.0003	0	0	0.0002	0.0018	0.0014	0.0016	0.0004	-	-	-	-	-	-	-	-	-	-	-	-	-	-	-	-	-	central_nervous_system	5
7	55221710	55221710	C	T	exonic	EGFR	-	nonsynonymous SNV	EGFR:NM_001346897:exon6:c.619C>T:p.R207C,EGFR:NM_001346899:exon6:c.619C>T:p.R207C,EGFR:NM_001346898:exon7:c.754C>T:p.R252C,EGFR:NM_001346900:exon7:c.595C>T:p.R199C,EGFR:NM_005228:exon7:c.754C>T:p.R252C,EGFR:NM_201282:exon7:c.754C>T:p.R252C,EGFR:NM_201283:exon7:c.754C>T:p.R252C,EGFR:NM_201284:exon7:c.754C>T:p.R252C	-	-	-	-	-	-	-	-	-	-	-	-	-	-	-	-	-	-	-	-	-	-	-	-	-	-	-	-	-	-	-	-	-	-	central_nervous_system	5
17	7577114	7577114	C	T	exonic	TP53	-	nonsynonymous SNV	TP53:NM_001126115:exon4:c.428G>A:p.C143Y,TP53:NM_001126116:exon4:c.428G>A:p.C143Y,TP53:NM_001126117:exon4:c.428G>A:p.C143Y,TP53:NM_001276697:exon4:c.347G>A:p.C116Y,TP53:NM_001276698:exon4:c.347G>A:p.C116Y,TP53:NM_001276699:exon4:c.347G>A:p.C116Y,TP53:NM_001126118:exon7:c.707G>A:p.C236Y,TP53:NM_000546:exon8:c.824G>A:p.C275Y,TP53:NM_001126112:exon8:c.824G>A:p.C275Y,TP53:NM_001126113:exon8:c.824G>A:…	-	-	-	-	-	-	-	-	-	-	-	-	-	-	-	-	-	3.186e-05	6.487e-05	0	7.182e-05	3.183e-05	0	.	0	0	6.487e-05	0	0	0	9.03e-05	7.35e-05	.	0.0002	central_nervous_system	3
17	7577114	7577114	C	A	exonic	TP53	-	nonsynonymous SNV	TP53:NM_001126115:exon4:c.428G>T:p.C143F,TP53:NM_001126116:exon4:c.428G>T:p.C143F,TP53:NM_001126117:exon4:c.428G>T:p.C143F,TP53:NM_001276697:exon4:c.347G>T:p.C116F,TP53:NM_001276698:exon4:c.347G>T:p.C116F,TP53:NM_001276699:exon4:c.347G>T:p.C116F,TP53:NM_001126118:exon7:c.707G>T:p.C236F,TP53:NM_000546:exon8:c.824G>T:p.C275F,TP53:NM_001126112:exon8:c.824G>T:p.C275F,TP53:NM_001126113:exon8:c.824G>T:…	-	-	-	-	-	-	-	-	-	-	-	-	-	-	-	-	-	-	-	-	-	-	-	-	-	-	-	-	-	-	-	-	-	-	central_nervous_system	2
17	7578271	7578271	T	C	exonic	TP53	-	nonsynonymous SNV	TP53:NM_001126115:exon2:c.182A>G:p.H61R,TP53:NM_001126116:exon2:c.182A>G:p.H61R,TP53:NM_001126117:exon2:c.182A>G:p.H61R,TP53:NM_001276697:exon2:c.101A>G:p.H34R,TP53:NM_001276698:exon2:c.101A>G:p.H34R,TP53:NM_001276699:exon2:c.101A>G:p.H34R,TP53:NM_001126118:exon5:c.461A>G:p.H154R,TP53:NM_000546:exon6:c.578A>G:p.H193R,TP53:NM_001126112:exon6:c.578A>G:p.H193R,TP53:NM_001126113:exon6:c.578A>G:p.H193…	-	-	-	-	-	-	-	-	-	-	-	-	-	-	-	-	-	-	-	-	-	-	-	-	-	-	-	-	-	-	-	-	-	-	central_nervous_system	3
17	7578271	7578271	T	G	exonic	TP53	-	nonsynonymous SNV	TP53:NM_001126115:exon2:c.182A>C:p.H61P,TP53:NM_001126116:exon2:c.182A>C:p.H61P,TP53:NM_001126117:exon2:c.182A>C:p.H61P,TP53:NM_001276697:exon2:c.101A>C:p.H34P,TP53:NM_001276698:exon2:c.101A>C:p.H34P,TP53:NM_001276699:exon2:c.101A>C:p.H34P,TP53:NM_001126118:exon5:c.461A>C:p.H154P,TP53:NM_000546:exon6:c.578A>C:p.H193P,TP53:NM_001126112:exon6:c.578A>C:p.H193P,TP53:NM_001126113:exon6:c.578A>C:p.H193…	-	-	-	-	-	-	-	-	-	-	-	-	-	-	-	-	-	-	-	-	-	-	-	-	-	-	-	-	-	-	-	-	-	-	central_nervous_system	1
17	7578271	7578271	T	A	exonic	TP53	-	nonsynonymous SNV	TP53:NM_001126115:exon2:c.182A>T:p.H61L,TP53:NM_001126116:exon2:c.182A>T:p.H61L,TP53:NM_001126117:exon2:c.182A>T:p.H61L,TP53:NM_001276697:exon2:c.101A>T:p.H34L,TP53:NM_001276698:exon2:c.101A>T:p.H34L,TP53:NM_001276699:exon2:c.101A>T:p.H34L,TP53:NM_001126118:exon5:c.461A>T:p.H154L,TP53:NM_000546:exon6:c.578A>T:p.H193L,TP53:NM_001126112:exon6:c.578A>T:p.H193L,TP53:NM_001126113:exon6:c.578A>T:p.H193…	-	-	-	-	-	-	-	-	-	-	-	-	-	-	-	-	-	-	-	-	-	-	-	-	-	-	-	-	-	-	-	-	-	-	central_nervous_system	1
3	178917478	178917478	G	A	exonic	PIK3CA	-	nonsynonymous SNV	PIK3CA:NM_006218:exon3:c.353G>A:p.G118D	-	-	-	-	-	-	-	-	-	-	-	-	-	-	-	-	-	-	-	-	-	-	-	-	-	-	-	-	-	-	-	-	-	-	central_nervous_system	5
19	42799051	42799051	G	A	exonic	CIC	-	nonsynonymous SNV	CIC:NM_015125:exon20:c.4535G>A:p.R1512H,CIC:NM_001304815:exon21:c.7262G>A:p.R2421H	-	-	-	-	-	-	-	-	-	-	-	-	-	-	-	-	-	-	-	-	-	-	-	-	-	-	-	-	-	-	-	-	-	-	central_nervous_system	3
19	42799051	42799051	G	T	exonic	CIC	-	nonsynonymous SNV	CIC:NM_015125:exon20:c.4535G>T:p.R1512L,CIC:NM_001304815:exon21:c.7262G>T:p.R2421L	-	-	-	-	-	-	-	-	-	-	-	-	-	-	-	-	-	-	-	-	-	-	-	-	-	-	-	-	-	-	-	-	-	-	central_nervous_system	2
19	42791718	42791718	C	T	exonic	CIC	-	nonsynonymous SNV	CIC:NM_015125:exon5:c.604C>T:p.R202W,CIC:NM_001304815:exon6:c.3331C>T:p.R1111W	3.988e-06	.	7.377e-06	0	1.193e-05	0	0	0	0	0	4.76e-05	0	0	.	.	.	.	-	-	-	-	-	-	-	-	-	-	-	-	-	-	-	-	-	central_nervous_system	5
3	178936091	178936091	G	A	exonic	PIK3CA	-	nonsynonymous SNV	PIK3CA:NM_006218:exon10:c.1633G>A:p.E545K	4.032e-06	8.879e-06	0	8.821e-06	4.004e-06	0	0	0	0	8.879e-06	0	0	0	9.045e-06	1.127e-05	.	.	-	-	-	-	-	-	-	-	-	-	-	-	-	-	-	-	-	central_nervous_system	4
7	55221743	55221743	A	C	exonic	EGFR	-	nonsynonymous SNV	EGFR:NM_001346897:exon6:c.652A>C:p.T218P,EGFR:NM_001346899:exon6:c.652A>C:p.T218P,EGFR:NM_001346898:exon7:c.787A>C:p.T263P,EGFR:NM_001346900:exon7:c.628A>C:p.T210P,EGFR:NM_005228:exon7:c.787A>C:p.T263P,EGFR:NM_201282:exon7:c.787A>C:p.T263P,EGFR:NM_201283:exon7:c.787A>C:p.T263P,EGFR:NM_201284:exon7:c.787A>C:p.T263P	-	-	-	-	-	-	-	-	-	-	-	-	-	-	-	-	-	-	-	-	-	-	-	-	-	-	-	-	-	-	-	-	-	-	central_nervous_system	4
17	7578466	7578466	G	T	exonic	TP53	-	nonsynonymous SNV	TP53:NM_001126115:exon1:c.68C>A:p.T23N,TP53:NM_001126116:exon1:c.68C>A:p.T23N,TP53:NM_001126117:exon1:c.68C>A:p.T23N,TP53:NM_001126118:exon4:c.347C>A:p.T116N,TP53:NM_000546:exon5:c.464C>A:p.T155N,TP53:NM_001126112:exon5:c.464C>A:p.T155N,TP53:NM_001126113:exon5:c.464C>A:p.T155N,TP53:NM_001126114:exon5:c.464C>A:p.T155N,TP53:NM_001276695:exon5:c.347C>A:p.T116N,TP53:NM_001276696:exon5:c.347C>A:p.T116…	-	-	-	-	-	-	-	-	-	-	-	-	-	-	-	-	-	-	-	-	-	-	-	-	-	-	-	-	-	-	-	-	-	-	central_nervous_system	4
7	6628405	6628405	G	A	exonic	ZDHHC4	-	nonsynonymous SNV	ZDHHC4:NM_001371293:exon7:c.899G>A:p.R300H,ZDHHC4:NM_001371298:exon7:c.839G>A:p.R280H,ZDHHC4:NM_001134387:exon8:c.899G>A:p.R300H,ZDHHC4:NM_001134389:exon8:c.899G>A:p.R300H,ZDHHC4:NM_001371292:exon8:c.944G>A:p.R315H,ZDHHC4:NM_001371296:exon8:c.899G>A:p.R300H,ZDHHC4:NM_001371297:exon8:c.899G>A:p.R300H,ZDHHC4:NM_018106:exon8:c.899G>A:p.R300H,ZDHHC4:NM_001134388:exon9:c.899G>A:p.R300H,ZDHHC4:NM_00137…	3.976e-05	0.0002	3.679e-05	4.327e-05	3.976e-05	0	0	0.0002	0	8.791e-06	0	0	0.0002	0.0002	0.0003	0.0002	0.0002	9.554e-05	0.0001	5.721e-05	0.0001	9.549e-05	0	.	0	0	0.0001	0	0	0.0009	0.0002	0.0001	.	0.0002	central_nervous_system	4
19	42799059	42799059	C	T	exonic	CIC	-	nonsynonymous SNV	CIC:NM_015125:exon20:c.4543C>T:p.R1515C,CIC:NM_001304815:exon21:c.7270C>T:p.R2424C	-	-	-	-	-	-	-	-	-	-	-	-	-	-	-	-	-	-	-	-	-	-	-	-	-	-	-	-	-	-	-	-	-	-	central_nervous_system	4
15	90631839	90631839	T	C	exonic	IDH2	-	nonsynonymous SNV	IDH2:NM_001290114:exon2:c.124A>G:p.R42G,IDH2:NM_001289910:exon4:c.358A>G:p.R120G,IDH2:NM_002168:exon4:c.514A>G:p.R172G	-	-	-	-	-	-	-	-	-	-	-	-	-	-	-	-	-	-	-	-	-	-	-	-	-	-	-	-	-	-	-	-	-	-	central_nervous_system	2
15	90631839	90631839	T	A	exonic	IDH2	-	nonsynonymous SNV	IDH2:NM_001290114:exon2:c.124A>T:p.R42W,IDH2:NM_001289910:exon4:c.358A>T:p.R120W,IDH2:NM_002168:exon4:c.514A>T:p.R172W	-	-	-	-	-	-	-	-	-	-	-	-	-	-	-	-	-	-	-	-	-	-	-	-	-	-	-	-	-	-	-	-	-	-	central_nervous_system	2
17	7578413	7578413	C	T	exonic	TP53	-	nonsynonymous SNV	TP53:NM_001126115:exon1:c.121G>A:p.V41M,TP53:NM_001126116:exon1:c.121G>A:p.V41M,TP53:NM_001126117:exon1:c.121G>A:p.V41M,TP53:NM_001276697:exon1:c.40G>A:p.V14M,TP53:NM_001276698:exon1:c.40G>A:p.V14M,TP53:NM_001276699:exon1:c.40G>A:p.V14M,TP53:NM_001126118:exon4:c.400G>A:p.V134M,TP53:NM_000546:exon5:c.517G>A:p.V173M,TP53:NM_001126112:exon5:c.517G>A:p.V173M,TP53:NM_001126113:exon5:c.517G>A:p.V173M,T…	-	-	-	-	-	-	-	-	-	-	-	-	-	-	-	-	-	-	-	-	-	-	-	-	-	-	-	-	-	-	-	-	-	-	central_nervous_system	2
17	7578413	7578413	C	G	exonic	TP53	-	nonsynonymous SNV	TP53:NM_001126115:exon1:c.121G>C:p.V41L,TP53:NM_001126116:exon1:c.121G>C:p.V41L,TP53:NM_001126117:exon1:c.121G>C:p.V41L,TP53:NM_001276697:exon1:c.40G>C:p.V14L,TP53:NM_001276698:exon1:c.40G>C:p.V14L,TP53:NM_001276699:exon1:c.40G>C:p.V14L,TP53:NM_001126118:exon4:c.400G>C:p.V134L,TP53:NM_000546:exon5:c.517G>C:p.V173L,TP53:NM_001126112:exon5:c.517G>C:p.V173L,TP53:NM_001126113:exon5:c.517G>C:p.V173L,T…	-	-	-	-	-	-	-	-	-	-	-	-	-	-	-	-	-	-	-	-	-	-	-	-	-	-	-	-	-	-	-	-	-	-	central_nervous_system	1
17	7578413	7578413	C	A	exonic	TP53	-	nonsynonymous SNV	TP53:NM_001126115:exon1:c.121G>T:p.V41L,TP53:NM_001126116:exon1:c.121G>T:p.V41L,TP53:NM_001126117:exon1:c.121G>T:p.V41L,TP53:NM_001276697:exon1:c.40G>T:p.V14L,TP53:NM_001276698:exon1:c.40G>T:p.V14L,TP53:NM_001276699:exon1:c.40G>T:p.V14L,TP53:NM_001126118:exon4:c.400G>T:p.V134L,TP53:NM_000546:exon5:c.517G>T:p.V173L,TP53:NM_001126112:exon5:c.517G>T:p.V173L,TP53:NM_001126113:exon5:c.517G>T:p.V173L,T…	-	-	-	-	-	-	-	-	-	-	-	-	-	-	-	-	-	-	-	-	-	-	-	-	-	-	-	-	-	-	-	-	-	-	central_nervous_system	1
19	42791758	42791758	G	A	exonic	CIC	-	nonsynonymous SNV	CIC:NM_015125:exon5:c.644G>A:p.R215Q,CIC:NM_001304815:exon6:c.3371G>A:p.R1124Q	0	.	0	0	7.952e-06	0	0	0	0	0	0	0	0	.	.	.	.	-	-	-	-	-	-	-	-	-	-	-	-	-	-	-	-	-	central_nervous_system	4
3	178936082	178936082	G	A	exonic	PIK3CA	-	nonsynonymous SNV	PIK3CA:NM_006218:exon10:c.1624G>A:p.E542K	-	-	-	-	-	-	-	-	-	-	-	-	-	-	-	-	-	-	-	-	-	-	-	-	-	-	-	-	-	-	-	-	-	-	central_nervous_system	3
11	55541619	55541619	C	T	exonic	OR5D13	-	nonsynonymous SNV	OR5D13:NM_001001967:exon1:c.706C>T:p.R236C	4.788e-05	9.813e-05	7.383e-05	1.736e-05	4.772e-05	6.157e-05	9.813e-05	0	0	6.178e-05	0	0	0.0002	9.813e-05	9.815e-05	9.842e-05	0.0001	6.376e-05	0.0001	0	0.0001	6.366e-05	0.0001	.	0	0	6.483e-05	0	0	0	0.0001	7.344e-05	.	.	central_nervous_system	3
17	7578550	7578550	G	T	exonic	TP53	-	nonsynonymous SNV	TP53:NM_001126118:exon4:c.263C>A:p.S88Y,TP53:NM_000546:exon5:c.380C>A:p.S127Y,TP53:NM_001126112:exon5:c.380C>A:p.S127Y,TP53:NM_001126113:exon5:c.380C>A:p.S127Y,TP53:NM_001126114:exon5:c.380C>A:p.S127Y,TP53:NM_001276695:exon5:c.263C>A:p.S88Y,TP53:NM_001276696:exon5:c.263C>A:p.S88Y,TP53:NM_001276760:exon5:c.263C>A:p.S88Y,TP53:NM_001276761:exon5:c.263C>A:p.S88Y	-	-	-	-	-	-	-	-	-	-	-	-	-	-	-	-	-	-	-	-	-	-	-	-	-	-	-	-	-	-	-	-	-	-	central_nervous_system	2
17	7578550	7578550	G	A	exonic	TP53	-	nonsynonymous SNV	TP53:NM_001126118:exon4:c.263C>T:p.S88F,TP53:NM_000546:exon5:c.380C>T:p.S127F,TP53:NM_001126112:exon5:c.380C>T:p.S127F,TP53:NM_001126113:exon5:c.380C>T:p.S127F,TP53:NM_001126114:exon5:c.380C>T:p.S127F,TP53:NM_001276695:exon5:c.263C>T:p.S88F,TP53:NM_001276696:exon5:c.263C>T:p.S88F,TP53:NM_001276760:exon5:c.263C>T:p.S88F,TP53:NM_001276761:exon5:c.263C>T:p.S88F	-	-	-	-	-	-	-	-	-	-	-	-	-	-	-	-	-	-	-	-	-	-	-	-	-	-	-	-	-	-	-	-	-	-	central_nervous_system	1
5	161113291	161113291	G	T	exonic	GABRA6	-	nonsynonymous SNV	GABRA6:NM_000811:exon2:c.94G>T:p.V32F	-	-	-	-	-	-	-	-	-	-	-	-	-	-	-	-	-	-	-	-	-	-	-	-	-	-	-	-	-	-	-	-	-	-	central_nervous_system	2
5	161113291	161113291	G	A	exonic	GABRA6	-	nonsynonymous SNV	GABRA6:NM_000811:exon2:c.94G>A:p.V32I	1.591e-05	6.533e-05	2.208e-05	8.655e-06	1.988e-05	0	6.533e-05	0	0	1.759e-05	0	0	0	6.533e-05	6.534e-05	6.552e-05	0.0001	-	-	-	-	-	-	-	-	-	-	-	-	-	-	-	-	-	central_nervous_system	1
10	89692911	89692911	G	A	exonic	PTEN	-	nonsynonymous SNV	PTEN:NM_000314:exon5:c.395G>A:p.G132D,PTEN:NM_001304717:exon6:c.914G>A:p.G305D	-	-	-	-	-	-	-	-	-	-	-	-	-	-	-	-	-	-	-	-	-	-	-	-	-	-	-	-	-	-	-	-	-	-	central_nervous_system	3
17	7577096	7577096	T	G	exonic	TP53	-	nonsynonymous SNV	TP53:NM_001126115:exon4:c.446A>C:p.D149A,TP53:NM_001126116:exon4:c.446A>C:p.D149A,TP53:NM_001126117:exon4:c.446A>C:p.D149A,TP53:NM_001276697:exon4:c.365A>C:p.D122A,TP53:NM_001276698:exon4:c.365A>C:p.D122A,TP53:NM_001276699:exon4:c.365A>C:p.D122A,TP53:NM_001126118:exon7:c.725A>C:p.D242A,TP53:NM_000546:exon8:c.842A>C:p.D281A,TP53:NM_001126112:exon8:c.842A>C:p.D281A,TP53:NM_001126113:exon8:c.842A>C:…	-	-	-	-	-	-	-	-	-	-	-	-	-	-	-	-	-	-	-	-	-	-	-	-	-	-	-	-	-	-	-	-	-	-	central_nervous_system	2
17	7577096	7577096	T	A	exonic	TP53	-	nonsynonymous SNV	TP53:NM_001126115:exon4:c.446A>T:p.D149V,TP53:NM_001126116:exon4:c.446A>T:p.D149V,TP53:NM_001126117:exon4:c.446A>T:p.D149V,TP53:NM_001276697:exon4:c.365A>T:p.D122V,TP53:NM_001276698:exon4:c.365A>T:p.D122V,TP53:NM_001276699:exon4:c.365A>T:p.D122V,TP53:NM_001126118:exon7:c.725A>T:p.D242V,TP53:NM_000546:exon8:c.842A>T:p.D281V,TP53:NM_001126112:exon8:c.842A>T:p.D281V,TP53:NM_001126113:exon8:c.842A>T:…	-	-	-	-	-	-	-	-	-	-	-	-	-	-	-	-	-	-	-	-	-	-	-	-	-	-	-	-	-	-	-	-	-	-	central_nervous_system	1
20	39802384	39802384	G	A	exonic	PLCG1	-	nonsynonymous SNV	PLCG1:NM_002660:exon29:c.3487G>A:p.E1163K,PLCG1:NM_182811:exon29:c.3487G>A:p.E1163K	-	-	-	-	-	-	-	-	-	-	-	-	-	-	-	-	-	-	-	-	-	-	-	-	-	-	-	-	-	-	-	-	-	-	central_nervous_system	3
20	43836216	43836216	C	T	exonic	SEMG1	-	nonsynonymous SNV	SEMG1:NM_003007:exon2:c.278C>T:p.T93M	6.38e-05	0.0002	3.69e-05	9.542e-05	6.362e-05	0.0002	6.557e-05	2.902e-05	5.437e-05	5.29e-05	4.63e-05	0	0.0003	0.0002	0.0002	0.0002	0.0001	3.188e-05	6.489e-05	0	7.191e-05	3.183e-05	0	.	0	0	6.489e-05	0	0	0	9.035e-05	7.352e-05	.	.	central_nervous_system	3
10	89692835	89692835	G	T	exonic	PTEN	-	nonsynonymous SNV	PTEN:NM_000314:exon5:c.319G>T:p.D107Y,PTEN:NM_001304717:exon6:c.838G>T:p.D280Y	-	-	-	-	-	-	-	-	-	-	-	-	-	-	-	-	-	-	-	-	-	-	-	-	-	-	-	-	-	-	-	-	-	-	central_nervous_system	2
10	89692835	89692835	G	C	exonic	PTEN	-	nonsynonymous SNV	PTEN:NM_000314:exon5:c.319G>C:p.D107H,PTEN:NM_001304717:exon6:c.838G>C:p.D280H	-	-	-	-	-	-	-	-	-	-	-	-	-	-	-	-	-	-	-	-	-	-	-	-	-	-	-	-	-	-	-	-	-	-	central_nervous_system	1
17	7578265	7578265	A	G	exonic	TP53	-	nonsynonymous SNV	TP53:NM_001126115:exon2:c.188T>C:p.I63T,TP53:NM_001126116:exon2:c.188T>C:p.I63T,TP53:NM_001126117:exon2:c.188T>C:p.I63T,TP53:NM_001276697:exon2:c.107T>C:p.I36T,TP53:NM_001276698:exon2:c.107T>C:p.I36T,TP53:NM_001276699:exon2:c.107T>C:p.I36T,TP53:NM_001126118:exon5:c.467T>C:p.I156T,TP53:NM_000546:exon6:c.584T>C:p.I195T,TP53:NM_001126112:exon6:c.584T>C:p.I195T,TP53:NM_001126113:exon6:c.584T>C:p.I195…	0	.	0	0	3.976e-06	0	0	0	0	0	0	0	0	.	.	.	.	-	-	-	-	-	-	-	-	-	-	-	-	-	-	-	-	-	central_nervous_system	2
17	7578265	7578265	A	T	exonic	TP53	-	nonsynonymous SNV	TP53:NM_001126115:exon2:c.188T>A:p.I63N,TP53:NM_001126116:exon2:c.188T>A:p.I63N,TP53:NM_001126117:exon2:c.188T>A:p.I63N,TP53:NM_001276697:exon2:c.107T>A:p.I36N,TP53:NM_001276698:exon2:c.107T>A:p.I36N,TP53:NM_001276699:exon2:c.107T>A:p.I36N,TP53:NM_001126118:exon5:c.467T>A:p.I156N,TP53:NM_000546:exon6:c.584T>A:p.I195N,TP53:NM_001126112:exon6:c.584T>A:p.I195N,TP53:NM_001126113:exon6:c.584T>A:p.I195…	-	-	-	-	-	-	-	-	-	-	-	-	-	-	-	-	-	-	-	-	-	-	-	-	-	-	-	-	-	-	-	-	-	-	central_nervous_system	1
17	78447110	78447110	C	T	exonic	NPTX1	-	nonsynonymous SNV	NPTX1:NM_002522:exon3:c.787G>A:p.A263T	1.592e-05	3.266e-05	2.209e-05	8.666e-06	1.59e-05	0	3.266e-05	2.892e-05	0	8.806e-06	4.624e-05	0	0	3.266e-05	3.277e-05	3.276e-05	6.373e-05	6.369e-05	0.0024	0.0001	0	6.366e-05	0	.	0.0024	0	0	0	0	0	0.0025	0.0036	.	0.0081	central_nervous_system	3
20	43837052	43837052	C	T	exonic	SEMG1	-	nonsynonymous SNV	SEMG1:NM_003007:exon2:c.1114C>T:p.R372C	5.98e-05	0.0001	4.426e-05	7.808e-05	5.964e-05	0.0001	3.272e-05	0	0	0.0001	0	0	0	0.0002	0.0001	0.0001	0.0001	3.189e-05	0.0001	0	7.191e-05	3.183e-05	0.0001	.	0	0	0	0	0	0	0.0001	.	.	.	central_nervous_system	3
10	89711900	89711900	G	A	exonic	PTEN	-	nonsynonymous SNV	PTEN:NM_000314:exon6:c.518G>A:p.R173H,PTEN:NM_001304717:exon7:c.1037G>A:p.R346H	7.963e-06	6.155e-05	0	1.733e-05	7.953e-06	6.155e-05	0	0	0	0	0	9.923e-05	0	8.319e-05	6.169e-05	.	.	-	-	-	-	-	-	-	-	-	-	-	-	-	-	-	-	-	central_nervous_system	3
10	89711899	89711899	C	T	exonic	PTEN	-	nonsynonymous SNV	PTEN:NM_000314:exon6:c.517C>T:p.R173C,PTEN:NM_001304717:exon7:c.1036C>T:p.R346C	-	-	-	-	-	-	-	-	-	-	-	-	-	-	-	-	-	-	-	-	-	-	-	-	-	-	-	-	-	-	-	-	-	-	central_nervous_system	3
6	43403588	43403588	C	T	exonic	ABCC10	-	nonsynonymous SNV	ABCC10:NM_033450:exon3:c.1579C>T:p.R527W,ABCC10:NM_001198934:exon5:c.1708C>T:p.R570W,ABCC10:NM_001350518:exon5:c.376C>T:p.R126W	3.977e-06	3.266e-05	7.357e-06	0	3.976e-06	0	3.266e-05	0	0	0	0	0	0	3.266e-05	3.267e-05	3.276e-05	.	-	-	-	-	-	-	-	-	-	-	-	-	-	-	-	-	-	central_nervous_system	3
17	7578280	7578280	G	A	exonic	TP53	-	nonsynonymous SNV	TP53:NM_001126115:exon2:c.173C>T:p.P58L,TP53:NM_001126116:exon2:c.173C>T:p.P58L,TP53:NM_001126117:exon2:c.173C>T:p.P58L,TP53:NM_001276697:exon2:c.92C>T:p.P31L,TP53:NM_001276698:exon2:c.92C>T:p.P31L,TP53:NM_001276699:exon2:c.92C>T:p.P31L,TP53:NM_001126118:exon5:c.452C>T:p.P151L,TP53:NM_000546:exon6:c.569C>T:p.P190L,TP53:NM_001126112:exon6:c.569C>T:p.P190L,TP53:NM_001126113:exon6:c.569C>T:p.P190L,T…	-	-	-	-	-	-	-	-	-	-	-	-	-	-	-	-	-	-	-	-	-	-	-	-	-	-	-	-	-	-	-	-	-	-	central_nervous_system	2
17	7578280	7578280	G	C	exonic	TP53	-	nonsynonymous SNV	TP53:NM_001126115:exon2:c.173C>G:p.P58R,TP53:NM_001126116:exon2:c.173C>G:p.P58R,TP53:NM_001126117:exon2:c.173C>G:p.P58R,TP53:NM_001276697:exon2:c.92C>G:p.P31R,TP53:NM_001276698:exon2:c.92C>G:p.P31R,TP53:NM_001276699:exon2:c.92C>G:p.P31R,TP53:NM_001126118:exon5:c.452C>G:p.P151R,TP53:NM_000546:exon6:c.569C>G:p.P190R,TP53:NM_001126112:exon6:c.569C>G:p.P190R,TP53:NM_001126113:exon6:c.569C>G:p.P190R,T…	-	-	-	-	-	-	-	-	-	-	-	-	-	-	-	-	-	-	-	-	-	-	-	-	-	-	-	-	-	-	-	-	-	-	central_nervous_system	1
7	55240690	55240690	C	G	exonic	EGFR	-	nonsynonymous SNV	EGFR:NM_001346941:exon11:c.1133C>G:p.S378C,EGFR:NM_001346897:exon16:c.1799C>G:p.S600C,EGFR:NM_001346899:exon16:c.1799C>G:p.S600C,EGFR:NM_001346898:exon17:c.1934C>G:p.S645C,EGFR:NM_001346900:exon17:c.1775C>G:p.S592C,EGFR:NM_005228:exon17:c.1934C>G:p.S645C	-	-	-	-	-	-	-	-	-	-	-	-	-	-	-	-	-	-	-	-	-	-	-	-	-	-	-	-	-	-	-	-	-	-	central_nervous_system	3
17	7578524	7578524	G	C	exonic	TP53	-	nonsynonymous SNV	TP53:NM_001126115:exon1:c.10C>G:p.Q4E,TP53:NM_001126116:exon1:c.10C>G:p.Q4E,TP53:NM_001126117:exon1:c.10C>G:p.Q4E,TP53:NM_001126118:exon4:c.289C>G:p.Q97E,TP53:NM_000546:exon5:c.406C>G:p.Q136E,TP53:NM_001126112:exon5:c.406C>G:p.Q136E,TP53:NM_001126113:exon5:c.406C>G:p.Q136E,TP53:NM_001126114:exon5:c.406C>G:p.Q136E,TP53:NM_001276695:exon5:c.289C>G:p.Q97E,TP53:NM_001276696:exon5:c.289C>G:p.Q97E,TP53…	-	-	-	-	-	-	-	-	-	-	-	-	-	-	-	-	-	-	-	-	-	-	-	-	-	-	-	-	-	-	-	-	-	-	central_nervous_system	3
4	188924752	188924752	C	T	exonic	ZFP42	-	nonsynonymous SNV	ZFP42:NM_001304358:exon3:c.791C>T:p.T264M,ZFP42:NM_174900:exon4:c.791C>T:p.T264M	3.99e-06	8.792e-06	7.377e-06	0	1.59e-05	0	0	0	0	8.792e-06	0	0	0	8.957e-06	1.117e-05	9.734e-06	.	-	-	-	-	-	-	-	-	-	-	-	-	-	-	-	-	-	central_nervous_system	3
3	178916876	178916876	G	A	exonic	PIK3CA	-	nonsynonymous SNV	PIK3CA:NM_006218:exon2:c.263G>A:p.R88Q	-	-	-	-	-	-	-	-	-	-	-	-	-	-	-	-	-	-	-	-	-	-	-	-	-	-	-	-	-	-	-	-	-	-	central_nervous_system	3
1	113252867	113252867	C	T	exonic	PPM1J	-	nonsynonymous SNV	PPM1J:NM_005167:exon10:c.1436G>A:p.R479H	8.239e-05	0.0004	0.0001	4.765e-05	9.546e-05	0.0004	0.0003	0	0	5.588e-05	0	0	0	0.0003	0.0004	0.0004	0.0006	9.585e-05	0.0002	0.0002	0	9.549e-05	0.0002	.	0	0	6.503e-05	0	0	0	0.0002	0.0003	.	0.0004	central_nervous_system	3
20	51870661	51870661	G	A	exonic	TSHZ2	-	nonsynonymous SNV	TSHZ2:NM_001193421:exon2:c.655G>A:p.A219T,TSHZ2:NM_173485:exon2:c.664G>A:p.A222T	1.591e-05	6.533e-05	7.359e-06	2.597e-05	1.988e-05	0	6.533e-05	0	0	1.759e-05	0	0	0	6.533e-05	6.534e-05	6.552e-05	0.0001	6.372e-05	0.0002	0.0001	0	6.366e-05	0.0002	.	0	0	0	0	0	0	0.0002	0.0003	.	0.0004	central_nervous_system	3
1	115256529	115256529	T	A	exonic	NRAS	-	nonsynonymous SNV	NRAS:NM_002524:exon3:c.182A>T:p.Q61L	-	-	-	-	-	-	-	-	-	-	-	-	-	-	-	-	-	-	-	-	-	-	-	-	-	-	-	-	-	-	-	-	-	-	central_nervous_system	2
1	115256529	115256529	T	C	exonic	NRAS	-	nonsynonymous SNV	NRAS:NM_002524:exon3:c.182A>G:p.Q61R	-	-	-	-	-	-	-	-	-	-	-	-	-	-	-	-	-	-	-	-	-	-	-	-	-	-	-	-	-	-	-	-	-	-	central_nervous_system	1
1	24727850	24727850	C	T	exonic	STPG1	-	nonsynonymous SNV	STPG1:NM_001199012:exon2:c.29G>A:p.R10H,STPG1:NM_001199013:exon2:c.29G>A:p.R10H,STPG1:NM_178122:exon2:c.7G>A:p.A3T	3.98e-06	2.895e-05	7.364e-06	0	3.976e-06	0	0	2.895e-05	0	0	0	0	0	2.906e-05	3.281e-05	2.923e-05	5.849e-05	-	-	-	-	-	-	-	-	-	-	-	-	-	-	-	-	-	central_nervous_system	3
7	55221711	55221711	G	C	exonic	EGFR	-	nonsynonymous SNV	EGFR:NM_001346897:exon6:c.620G>C:p.R207P,EGFR:NM_001346899:exon6:c.620G>C:p.R207P,EGFR:NM_001346898:exon7:c.755G>C:p.R252P,EGFR:NM_001346900:exon7:c.596G>C:p.R199P,EGFR:NM_005228:exon7:c.755G>C:p.R252P,EGFR:NM_201282:exon7:c.755G>C:p.R252P,EGFR:NM_201283:exon7:c.755G>C:p.R252P,EGFR:NM_201284:exon7:c.755G>C:p.R252P	-	-	-	-	-	-	-	-	-	-	-	-	-	-	-	-	-	-	-	-	-	-	-	-	-	-	-	-	-	-	-	-	-	-	central_nervous_system	3
2	167263066	167263066	C	T	exonic	SCN7A	-	nonsynonymous SNV	SCN7A:NM_002976:exon25:c.4073G>A:p.R1358H	3.223e-05	0.0001	5.197e-05	8.808e-06	3.195e-05	0	0	5.816e-05	0.0001	8.907e-06	0	0	0.0005	0.0001	0.0002	0.0001	0.0001	-	-	-	-	-	-	-	-	-	-	-	-	-	-	-	-	-	central_nervous_system	3
17	7578208	7578208	T	C	exonic	TP53	-	nonsynonymous SNV	TP53:NM_001126115:exon2:c.245A>G:p.H82R,TP53:NM_001126116:exon2:c.245A>G:p.H82R,TP53:NM_001126117:exon2:c.245A>G:p.H82R,TP53:NM_001276697:exon2:c.164A>G:p.H55R,TP53:NM_001276698:exon2:c.164A>G:p.H55R,TP53:NM_001276699:exon2:c.164A>G:p.H55R,TP53:NM_001126118:exon5:c.524A>G:p.H175R,TP53:NM_000546:exon6:c.641A>G:p.H214R,TP53:NM_001126112:exon6:c.641A>G:p.H214R,TP53:NM_001126113:exon6:c.641A>G:p.H214…	-	-	-	-	-	-	-	-	-	-	-	-	-	-	-	-	-	-	-	-	-	-	-	-	-	-	-	-	-	-	-	-	-	-	central_nervous_system	3
17	7577532	7577532	G	A	exonic	TP53	-	nonsynonymous SNV	TP53:NM_001126115:exon3:c.353C>T:p.P118L,TP53:NM_001126116:exon3:c.353C>T:p.P118L,TP53:NM_001126117:exon3:c.353C>T:p.P118L,TP53:NM_001276697:exon3:c.272C>T:p.P91L,TP53:NM_001276698:exon3:c.272C>T:p.P91L,TP53:NM_001276699:exon3:c.272C>T:p.P91L,TP53:NM_001126118:exon6:c.632C>T:p.P211L,TP53:NM_000546:exon7:c.749C>T:p.P250L,TP53:NM_001126112:exon7:c.749C>T:p.P250L,TP53:NM_001126113:exon7:c.749C>T:p.P…	-	-	-	-	-	-	-	-	-	-	-	-	-	-	-	-	-	-	-	-	-	-	-	-	-	-	-	-	-	-	-	-	-	-	central_nervous_system	3
17	7578395	7578395	G	C	exonic	TP53	-	nonsynonymous SNV	TP53:NM_001126115:exon1:c.139C>G:p.H47D,TP53:NM_001126116:exon1:c.139C>G:p.H47D,TP53:NM_001126117:exon1:c.139C>G:p.H47D,TP53:NM_001276697:exon1:c.58C>G:p.H20D,TP53:NM_001276698:exon1:c.58C>G:p.H20D,TP53:NM_001276699:exon1:c.58C>G:p.H20D,TP53:NM_001126118:exon4:c.418C>G:p.H140D,TP53:NM_000546:exon5:c.535C>G:p.H179D,TP53:NM_001126112:exon5:c.535C>G:p.H179D,TP53:NM_001126113:exon5:c.535C>G:p.H179D,T…	-	-	-	-	-	-	-	-	-	-	-	-	-	-	-	-	-	-	-	-	-	-	-	-	-	-	-	-	-	-	-	-	-	-	central_nervous_system	2
17	7578395	7578395	G	A	exonic	TP53	-	nonsynonymous SNV	TP53:NM_001126115:exon1:c.139C>T:p.H47Y,TP53:NM_001126116:exon1:c.139C>T:p.H47Y,TP53:NM_001126117:exon1:c.139C>T:p.H47Y,TP53:NM_001276697:exon1:c.58C>T:p.H20Y,TP53:NM_001276698:exon1:c.58C>T:p.H20Y,TP53:NM_001276699:exon1:c.58C>T:p.H20Y,TP53:NM_001126118:exon4:c.418C>T:p.H140Y,TP53:NM_000546:exon5:c.535C>T:p.H179Y,TP53:NM_001126112:exon5:c.535C>T:p.H179Y,TP53:NM_001126113:exon5:c.535C>T:p.H179Y,T…	-	-	-	-	-	-	-	-	-	-	-	-	-	-	-	-	-	-	-	-	-	-	-	-	-	-	-	-	-	-	-	-	-	-	central_nervous_system	1
17	7578475	7578475	G	A	exonic	TP53	-	nonsynonymous SNV	TP53:NM_001126115:exon1:c.59C>T:p.P20L,TP53:NM_001126116:exon1:c.59C>T:p.P20L,TP53:NM_001126117:exon1:c.59C>T:p.P20L,TP53:NM_001126118:exon4:c.338C>T:p.P113L,TP53:NM_000546:exon5:c.455C>T:p.P152L,TP53:NM_001126112:exon5:c.455C>T:p.P152L,TP53:NM_001126113:exon5:c.455C>T:p.P152L,TP53:NM_001126114:exon5:c.455C>T:p.P152L,TP53:NM_001276695:exon5:c.338C>T:p.P113L,TP53:NM_001276696:exon5:c.338C>T:p.P113…	7.959e-06	8.803e-06	0	1.732e-05	1.988e-05	0	0	0	0	8.803e-06	0	9.929e-05	0	8.967e-06	1.118e-05	.	.	-	-	-	-	-	-	-	-	-	-	-	-	-	-	-	-	-	central_nervous_system	2
17	7578475	7578475	G	T	exonic	TP53	-	nonsynonymous SNV	TP53:NM_001126115:exon1:c.59C>A:p.P20Q,TP53:NM_001126116:exon1:c.59C>A:p.P20Q,TP53:NM_001126117:exon1:c.59C>A:p.P20Q,TP53:NM_001126118:exon4:c.338C>A:p.P113Q,TP53:NM_000546:exon5:c.455C>A:p.P152Q,TP53:NM_001126112:exon5:c.455C>A:p.P152Q,TP53:NM_001126113:exon5:c.455C>A:p.P152Q,TP53:NM_001126114:exon5:c.455C>A:p.P152Q,TP53:NM_001276695:exon5:c.338C>A:p.P113Q,TP53:NM_001276696:exon5:c.338C>A:p.P113…	-	-	-	-	-	-	-	-	-	-	-	-	-	-	-	-	-	-	-	-	-	-	-	-	-	-	-	-	-	-	-	-	-	-	central_nervous_system	1
17	7577580	7577580	T	C	exonic	TP53	-	nonsynonymous SNV	TP53:NM_001126115:exon3:c.305A>G:p.Y102C,TP53:NM_001126116:exon3:c.305A>G:p.Y102C,TP53:NM_001126117:exon3:c.305A>G:p.Y102C,TP53:NM_001276697:exon3:c.224A>G:p.Y75C,TP53:NM_001276698:exon3:c.224A>G:p.Y75C,TP53:NM_001276699:exon3:c.224A>G:p.Y75C,TP53:NM_001126118:exon6:c.584A>G:p.Y195C,TP53:NM_000546:exon7:c.701A>G:p.Y234C,TP53:NM_001126112:exon7:c.701A>G:p.Y234C,TP53:NM_001126113:exon7:c.701A>G:p.Y…	3.976e-06	8.79e-06	0	8.653e-06	7.952e-06	0	0	0	0	8.79e-06	0	0	0	8.955e-06	1.117e-05	.	.	-	-	-	-	-	-	-	-	-	-	-	-	-	-	-	-	-	central_nervous_system	3
17	7578534	7578534	C	G	exonic	TP53	-	nonsynonymous SNV	TP53:NM_001126118:exon4:c.279G>C:p.K93N,TP53:NM_000546:exon5:c.396G>C:p.K132N,TP53:NM_001126112:exon5:c.396G>C:p.K132N,TP53:NM_001126113:exon5:c.396G>C:p.K132N,TP53:NM_001126114:exon5:c.396G>C:p.K132N,TP53:NM_001276695:exon5:c.279G>C:p.K93N,TP53:NM_001276696:exon5:c.279G>C:p.K93N,TP53:NM_001276760:exon5:c.279G>C:p.K93N,TP53:NM_001276761:exon5:c.279G>C:p.K93N	-	-	-	-	-	-	-	-	-	-	-	-	-	-	-	-	-	-	-	-	-	-	-	-	-	-	-	-	-	-	-	-	-	-	central_nervous_system	2
17	7578534	7578534	C	A	exonic	TP53	-	nonsynonymous SNV	TP53:NM_001126118:exon4:c.279G>T:p.K93N,TP53:NM_000546:exon5:c.396G>T:p.K132N,TP53:NM_001126112:exon5:c.396G>T:p.K132N,TP53:NM_001126113:exon5:c.396G>T:p.K132N,TP53:NM_001126114:exon5:c.396G>T:p.K132N,TP53:NM_001276695:exon5:c.279G>T:p.K93N,TP53:NM_001276696:exon5:c.279G>T:p.K93N,TP53:NM_001276760:exon5:c.279G>T:p.K93N,TP53:NM_001276761:exon5:c.279G>T:p.K93N	-	-	-	-	-	-	-	-	-	-	-	-	-	-	-	-	-	-	-	-	-	-	-	-	-	-	-	-	-	-	-	-	-	-	central_nervous_system	1
17	7577138	7577138	C	G	exonic	TP53	-	nonsynonymous SNV	TP53:NM_001126115:exon4:c.404G>C:p.R135P,TP53:NM_001126116:exon4:c.404G>C:p.R135P,TP53:NM_001126117:exon4:c.404G>C:p.R135P,TP53:NM_001276697:exon4:c.323G>C:p.R108P,TP53:NM_001276698:exon4:c.323G>C:p.R108P,TP53:NM_001276699:exon4:c.323G>C:p.R108P,TP53:NM_001126118:exon7:c.683G>C:p.R228P,TP53:NM_000546:exon8:c.800G>C:p.R267P,TP53:NM_001126112:exon8:c.800G>C:p.R267P,TP53:NM_001126113:exon8:c.800G>C:…	-	-	-	-	-	-	-	-	-	-	-	-	-	-	-	-	-	-	-	-	-	-	-	-	-	-	-	-	-	-	-	-	-	-	central_nervous_system	2
17	7577138	7577138	C	T	exonic	TP53	-	nonsynonymous SNV	TP53:NM_001126115:exon4:c.404G>A:p.R135Q,TP53:NM_001126116:exon4:c.404G>A:p.R135Q,TP53:NM_001126117:exon4:c.404G>A:p.R135Q,TP53:NM_001276697:exon4:c.323G>A:p.R108Q,TP53:NM_001276698:exon4:c.323G>A:p.R108Q,TP53:NM_001276699:exon4:c.323G>A:p.R108Q,TP53:NM_001126118:exon7:c.683G>A:p.R228Q,TP53:NM_000546:exon8:c.800G>A:p.R267Q,TP53:NM_001126112:exon8:c.800G>A:p.R267Q,TP53:NM_001126113:exon8:c.800G>A:…	1.203e-05	1.777e-05	0	2.618e-05	1.193e-05	0	0	0	0	1.777e-05	0	0	0.0002	1.811e-05	1.126e-05	9.824e-06	.	-	-	-	-	-	-	-	-	-	-	-	-	-	-	-	-	-	central_nervous_system	1
1	245862232	245862232	G	A	exonic	KIF26B	-	nonsynonymous SNV	KIF26B:NM_018012:exon14:c.6071G>A:p.R2024H	5.619e-05	8.854e-05	3.699e-05	7.895e-05	5.585e-05	0	0	2.898e-05	5.563e-05	8.854e-05	4.641e-05	0	0.0002	8.119e-05	0.0001	9.802e-05	0.0001	-	-	-	-	-	-	-	-	-	-	-	-	-	-	-	-	-	central_nervous_system	3
17	7578479	7578479	G	A	exonic	TP53	-	nonsynonymous SNV	TP53:NM_001126115:exon1:c.55C>T:p.P19S,TP53:NM_001126116:exon1:c.55C>T:p.P19S,TP53:NM_001126117:exon1:c.55C>T:p.P19S,TP53:NM_001126118:exon4:c.334C>T:p.P112S,TP53:NM_000546:exon5:c.451C>T:p.P151S,TP53:NM_001126112:exon5:c.451C>T:p.P151S,TP53:NM_001126113:exon5:c.451C>T:p.P151S,TP53:NM_001126114:exon5:c.451C>T:p.P151S,TP53:NM_001276695:exon5:c.334C>T:p.P112S,TP53:NM_001276696:exon5:c.334C>T:p.P112…	-	-	-	-	-	-	-	-	-	-	-	-	-	-	-	-	-	-	-	-	-	-	-	-	-	-	-	-	-	-	-	-	-	-	central_nervous_system	2
17	7578479	7578479	G	C	exonic	TP53	-	nonsynonymous SNV	TP53:NM_001126115:exon1:c.55C>G:p.P19A,TP53:NM_001126116:exon1:c.55C>G:p.P19A,TP53:NM_001126117:exon1:c.55C>G:p.P19A,TP53:NM_001126118:exon4:c.334C>G:p.P112A,TP53:NM_000546:exon5:c.451C>G:p.P151A,TP53:NM_001126112:exon5:c.451C>G:p.P151A,TP53:NM_001126113:exon5:c.451C>G:p.P151A,TP53:NM_001126114:exon5:c.451C>G:p.P151A,TP53:NM_001276695:exon5:c.334C>G:p.P112A,TP53:NM_001276696:exon5:c.334C>G:p.P112…	-	-	-	-	-	-	-	-	-	-	-	-	-	-	-	-	-	-	-	-	-	-	-	-	-	-	-	-	-	-	-	-	-	-	central_nervous_system	1
17	7577574	7577574	T	C	exonic	TP53	-	nonsynonymous SNV	TP53:NM_001126115:exon3:c.311A>G:p.Y104C,TP53:NM_001126116:exon3:c.311A>G:p.Y104C,TP53:NM_001126117:exon3:c.311A>G:p.Y104C,TP53:NM_001276697:exon3:c.230A>G:p.Y77C,TP53:NM_001276698:exon3:c.230A>G:p.Y77C,TP53:NM_001276699:exon3:c.230A>G:p.Y77C,TP53:NM_001126118:exon6:c.590A>G:p.Y197C,TP53:NM_000546:exon7:c.707A>G:p.Y236C,TP53:NM_001126112:exon7:c.707A>G:p.Y236C,TP53:NM_001126113:exon7:c.707A>G:p.Y…	-	-	-	-	-	-	-	-	-	-	-	-	-	-	-	-	-	-	-	-	-	-	-	-	-	-	-	-	-	-	-	-	-	-	central_nervous_system	3
3	178928079	178928079	G	A	exonic	PIK3CA	-	nonsynonymous SNV	PIK3CA:NM_006218:exon8:c.1357G>A:p.E453K	-	-	-	-	-	-	-	-	-	-	-	-	-	-	-	-	-	-	-	-	-	-	-	-	-	-	-	-	-	-	-	-	-	-	central_nervous_system	3
14	65544747	65544747	C	T	exonic	MAX	-	nonsynonymous SNV	MAX:NM_145112:exon3:c.152G>A:p.R51Q,MAX:NM_002382:exon4:c.179G>A:p.R60Q,MAX:NM_145113:exon4:c.179G>A:p.R60Q	-	-	-	-	-	-	-	-	-	-	-	-	-	-	-	-	-	-	-	-	-	-	-	-	-	-	-	-	-	-	-	-	-	-	central_nervous_system	3
5	67591097	67591097	A	G	exonic	PIK3R1	-	nonsynonymous SNV	PIK3R1:NM_001242466:exon6:c.601A>G:p.N201D,PIK3R1:NM_181504:exon7:c.880A>G:p.N294D,PIK3R1:NM_181524:exon7:c.790A>G:p.N264D,PIK3R1:NM_181523:exon13:c.1690A>G:p.N564D	-	-	-	-	-	-	-	-	-	-	-	-	-	-	-	-	-	-	-	-	-	-	-	-	-	-	-	-	-	-	-	-	-	-	central_nervous_system	3
3	178936095	178936095	A	C	exonic	PIK3CA	-	nonsynonymous SNV	PIK3CA:NM_006218:exon10:c.1637A>C:p.Q546P	-	-	-	-	-	-	-	-	-	-	-	-	-	-	-	-	-	-	-	-	-	-	-	-	-	-	-	-	-	-	-	-	-	-	central_nervous_system	2
3	178936095	178936095	A	G	exonic	PIK3CA	-	nonsynonymous SNV	PIK3CA:NM_006218:exon10:c.1637A>G:p.Q546R	-	-	-	-	-	-	-	-	-	-	-	-	-	-	-	-	-	-	-	-	-	-	-	-	-	-	-	-	-	-	-	-	-	-	central_nervous_system	1
17	7578458	7578458	G	T	exonic	TP53	-	nonsynonymous SNV	TP53:NM_001126115:exon1:c.76C>A:p.R26S,TP53:NM_001126116:exon1:c.76C>A:p.R26S,TP53:NM_001126117:exon1:c.76C>A:p.R26S,TP53:NM_001126118:exon4:c.355C>A:p.R119S,TP53:NM_000546:exon5:c.472C>A:p.R158S,TP53:NM_001126112:exon5:c.472C>A:p.R158S,TP53:NM_001126113:exon5:c.472C>A:p.R158S,TP53:NM_001126114:exon5:c.472C>A:p.R158S,TP53:NM_001276695:exon5:c.355C>A:p.R119S,TP53:NM_001276696:exon5:c.355C>A:p.R119…	-	-	-	-	-	-	-	-	-	-	-	-	-	-	-	-	-	-	-	-	-	-	-	-	-	-	-	-	-	-	-	-	-	-	central_nervous_system	2
17	7578458	7578458	G	C	exonic	TP53	-	nonsynonymous SNV	TP53:NM_001126115:exon1:c.76C>G:p.R26G,TP53:NM_001126116:exon1:c.76C>G:p.R26G,TP53:NM_001126117:exon1:c.76C>G:p.R26G,TP53:NM_001126118:exon4:c.355C>G:p.R119G,TP53:NM_000546:exon5:c.472C>G:p.R158G,TP53:NM_001126112:exon5:c.472C>G:p.R158G,TP53:NM_001126113:exon5:c.472C>G:p.R158G,TP53:NM_001126114:exon5:c.472C>G:p.R158G,TP53:NM_001276695:exon5:c.355C>G:p.R119G,TP53:NM_001276696:exon5:c.355C>G:p.R119…	-	-	-	-	-	-	-	-	-	-	-	-	-	-	-	-	-	-	-	-	-	-	-	-	-	-	-	-	-	-	-	-	-	-	central_nervous_system	1
17	7578403	7578403	C	T	exonic	TP53	-	nonsynonymous SNV	TP53:NM_001126115:exon1:c.131G>A:p.C44Y,TP53:NM_001126116:exon1:c.131G>A:p.C44Y,TP53:NM_001126117:exon1:c.131G>A:p.C44Y,TP53:NM_001276697:exon1:c.50G>A:p.C17Y,TP53:NM_001276698:exon1:c.50G>A:p.C17Y,TP53:NM_001276699:exon1:c.50G>A:p.C17Y,TP53:NM_001126118:exon4:c.410G>A:p.C137Y,TP53:NM_000546:exon5:c.527G>A:p.C176Y,TP53:NM_001126112:exon5:c.527G>A:p.C176Y,TP53:NM_001126113:exon5:c.527G>A:p.C176Y,T…	-	-	-	-	-	-	-	-	-	-	-	-	-	-	-	-	-	-	-	-	-	-	-	-	-	-	-	-	-	-	-	-	-	-	central_nervous_system	2
17	7578403	7578403	C	A	exonic	TP53	-	nonsynonymous SNV	TP53:NM_001126115:exon1:c.131G>T:p.C44F,TP53:NM_001126116:exon1:c.131G>T:p.C44F,TP53:NM_001126117:exon1:c.131G>T:p.C44F,TP53:NM_001276697:exon1:c.50G>T:p.C17F,TP53:NM_001276698:exon1:c.50G>T:p.C17F,TP53:NM_001276699:exon1:c.50G>T:p.C17F,TP53:NM_001126118:exon4:c.410G>T:p.C137F,TP53:NM_000546:exon5:c.527G>T:p.C176F,TP53:NM_001126112:exon5:c.527G>T:p.C176F,TP53:NM_001126113:exon5:c.527G>T:p.C176F,T…	3.98e-06	8.803e-06	7.362e-06	0	3.976e-06	0	0	0	0	8.803e-06	0	0	0	8.967e-06	1.118e-05	9.747e-06	.	-	-	-	-	-	-	-	-	-	-	-	-	-	-	-	-	-	central_nervous_system	1
12	25398284	25398284	C	T	exonic	KRAS	-	nonsynonymous SNV	KRAS:NM_001369786:exon2:c.35G>A:p.G12D,KRAS:NM_001369787:exon2:c.35G>A:p.G12D,KRAS:NM_004985:exon2:c.35G>A:p.G12D,KRAS:NM_033360:exon2:c.35G>A:p.G12D	4.011e-06	8.883e-06	0	8.726e-06	1.988e-05	0	0	0	0	8.883e-06	0	0	0	9.051e-06	1.127e-05	9.832e-06	2.369e-05	-	-	-	-	-	-	-	-	-	-	-	-	-	-	-	-	-	large_intestine	65
12	25398284	25398284	C	A	exonic	KRAS	-	nonsynonymous SNV	KRAS:NM_001369786:exon2:c.35G>T:p.G12V,KRAS:NM_001369787:exon2:c.35G>T:p.G12V,KRAS:NM_004985:exon2:c.35G>T:p.G12V,KRAS:NM_033360:exon2:c.35G>T:p.G12V	0	.	0	0	3.976e-06	0	0	0	0	0	0	0	0	.	.	.	.	-	-	-	-	-	-	-	-	-	-	-	-	-	-	-	-	-	large_intestine	56
12	25398284	25398284	C	G	exonic	KRAS	-	nonsynonymous SNV	KRAS:NM_001369786:exon2:c.35G>C:p.G12A,KRAS:NM_001369787:exon2:c.35G>C:p.G12A,KRAS:NM_004985:exon2:c.35G>C:p.G12A,KRAS:NM_033360:exon2:c.35G>C:p.G12A	0	.	0	0	3.976e-06	0	0	0	0	0	0	0	0	.	.	.	.	-	-	-	-	-	-	-	-	-	-	-	-	-	-	-	-	-	large_intestine	11
7	140453136	140453136	A	T	exonic	BRAF	-	nonsynonymous SNV	BRAF:NM_001354609:exon15:c.1799T>A:p.V600E,BRAF:NM_004333:exon15:c.1799T>A:p.V600E,BRAF:NM_001374244:exon16:c.1919T>A:p.V640E,BRAF:NM_001374258:exon16:c.1919T>A:p.V640E	3.98e-06	3.267e-05	7.364e-06	0	1.193e-05	0	3.267e-05	0	0	0	0	0	0	3.267e-05	3.268e-05	3.276e-05	6.373e-05	-	-	-	-	-	-	-	-	-	-	-	-	-	-	-	-	-	large_intestine	50
3	178936091	178936091	G	A	exonic	PIK3CA	-	nonsynonymous SNV	PIK3CA:NM_006218:exon10:c.1633G>A:p.E545K	4.032e-06	8.879e-06	0	8.821e-06	4.004e-06	0	0	0	0	8.879e-06	0	0	0	9.045e-06	1.127e-05	.	.	-	-	-	-	-	-	-	-	-	-	-	-	-	-	-	-	-	large_intestine	38
3	178936091	178936091	G	C	exonic	PIK3CA	-	nonsynonymous SNV	PIK3CA:NM_006218:exon10:c.1633G>C:p.E545Q	-	-	-	-	-	-	-	-	-	-	-	-	-	-	-	-	-	-	-	-	-	-	-	-	-	-	-	-	-	-	-	-	-	-	large_intestine	1
12	25398281	25398281	C	T	exonic	KRAS	-	nonsynonymous SNV	KRAS:NM_001369786:exon2:c.38G>A:p.G13D,KRAS:NM_001369787:exon2:c.38G>A:p.G13D,KRAS:NM_004985:exon2:c.38G>A:p.G13D,KRAS:NM_033360:exon2:c.38G>A:p.G13D	0	.	0	0	3.976e-06	0	0	0	0	0	0	0	0	.	.	.	.	-	-	-	-	-	-	-	-	-	-	-	-	-	-	-	-	-	large_intestine	39
17	7578406	7578406	C	T	exonic	TP53	-	nonsynonymous SNV	TP53:NM_001126115:exon1:c.128G>A:p.R43H,TP53:NM_001126116:exon1:c.128G>A:p.R43H,TP53:NM_001126117:exon1:c.128G>A:p.R43H,TP53:NM_001276697:exon1:c.47G>A:p.R16H,TP53:NM_001276698:exon1:c.47G>A:p.R16H,TP53:NM_001276699:exon1:c.47G>A:p.R16H,TP53:NM_001126118:exon4:c.407G>A:p.R136H,TP53:NM_000546:exon5:c.524G>A:p.R175H,TP53:NM_001126112:exon5:c.524G>A:p.R175H,TP53:NM_001126113:exon5:c.524G>A:p.R175H,T…	3.98e-06	8.803e-06	7.362e-06	0	3.976e-06	0	0	0	0	8.803e-06	0	0	0	8.968e-06	1.118e-05	9.747e-06	.	-	-	-	-	-	-	-	-	-	-	-	-	-	-	-	-	-	large_intestine	39
12	25398285	25398285	C	A	exonic	KRAS	-	nonsynonymous SNV	KRAS:NM_001369786:exon2:c.34G>T:p.G12C,KRAS:NM_001369787:exon2:c.34G>T:p.G12C,KRAS:NM_004985:exon2:c.34G>T:p.G12C,KRAS:NM_033360:exon2:c.34G>T:p.G12C	0	.	0	0	1.988e-05	0	0	0	0	0	0	0	0	.	.	.	.	-	-	-	-	-	-	-	-	-	-	-	-	-	-	-	-	-	large_intestine	17
12	25398285	25398285	C	T	exonic	KRAS	-	nonsynonymous SNV	KRAS:NM_001369786:exon2:c.34G>A:p.G12S,KRAS:NM_001369787:exon2:c.34G>A:p.G12S,KRAS:NM_004985:exon2:c.34G>A:p.G12S,KRAS:NM_033360:exon2:c.34G>A:p.G12S	0	.	0	0	7.953e-06	0	0	0	0	0	0	0	0	.	.	.	.	-	-	-	-	-	-	-	-	-	-	-	-	-	-	-	-	-	large_intestine	11
12	25398285	25398285	C	G	exonic	KRAS	-	nonsynonymous SNV	KRAS:NM_001369786:exon2:c.34G>C:p.G12R,KRAS:NM_001369787:exon2:c.34G>C:p.G12R,KRAS:NM_004985:exon2:c.34G>C:p.G12R,KRAS:NM_033360:exon2:c.34G>C:p.G12R	0	.	0	0	3.976e-06	0	0	0	0	0	0	0	0	.	.	.	.	-	-	-	-	-	-	-	-	-	-	-	-	-	-	-	-	-	large_intestine	2
3	178952085	178952085	A	G	exonic	PIK3CA	-	nonsynonymous SNV	PIK3CA:NM_006218:exon21:c.3140A>G:p.H1047R	4.028e-06	8.91e-06	0	8.802e-06	3.998e-06	0	0	0	0	8.91e-06	0	0	0	9.079e-06	1.123e-05	.	.	-	-	-	-	-	-	-	-	-	-	-	-	-	-	-	-	-	large_intestine	20
3	178952085	178952085	A	T	exonic	PIK3CA	-	nonsynonymous SNV	PIK3CA:NM_006218:exon21:c.3140A>T:p.H1047L	4.028e-06	8.91e-06	0	8.802e-06	3.998e-06	0	0	0	0	8.91e-06	0	0	0	9.079e-06	1.123e-05	.	.	-	-	-	-	-	-	-	-	-	-	-	-	-	-	-	-	-	large_intestine	1
17	7577094	7577094	G	A	exonic	TP53	-	nonsynonymous SNV	TP53:NM_001126115:exon4:c.448C>T:p.R150W,TP53:NM_001126116:exon4:c.448C>T:p.R150W,TP53:NM_001126117:exon4:c.448C>T:p.R150W,TP53:NM_001276697:exon4:c.367C>T:p.R123W,TP53:NM_001276698:exon4:c.367C>T:p.R123W,TP53:NM_001276699:exon4:c.367C>T:p.R123W,TP53:NM_001126118:exon7:c.727C>T:p.R243W,TP53:NM_000546:exon8:c.844C>T:p.R282W,TP53:NM_001126112:exon8:c.844C>T:p.R282W,TP53:NM_001126113:exon8:c.844C>T:…	3.978e-06	8.793e-06	0	8.655e-06	7.952e-06	0	0	0	0	8.793e-06	0	0	0	8.957e-06	1.117e-05	.	.	-	-	-	-	-	-	-	-	-	-	-	-	-	-	-	-	-	large_intestine	20
17	7577120	7577120	C	T	exonic	TP53	-	nonsynonymous SNV	TP53:NM_001126115:exon4:c.422G>A:p.R141H,TP53:NM_001126116:exon4:c.422G>A:p.R141H,TP53:NM_001126117:exon4:c.422G>A:p.R141H,TP53:NM_001276697:exon4:c.341G>A:p.R114H,TP53:NM_001276698:exon4:c.341G>A:p.R114H,TP53:NM_001276699:exon4:c.341G>A:p.R114H,TP53:NM_001126118:exon7:c.701G>A:p.R234H,TP53:NM_000546:exon8:c.818G>A:p.R273H,TP53:NM_001126112:exon8:c.818G>A:p.R273H,TP53:NM_001126113:exon8:c.818G>A:…	1.593e-05	2.643e-05	2.21e-05	8.671e-06	3.976e-05	0	0	0	0	2.643e-05	0	9.929e-05	0	2.692e-05	3.355e-05	2.925e-05	7.024e-05	-	-	-	-	-	-	-	-	-	-	-	-	-	-	-	-	-	large_intestine	18
17	7577538	7577538	C	T	exonic	TP53	-	nonsynonymous SNV	TP53:NM_001126115:exon3:c.347G>A:p.R116Q,TP53:NM_001126116:exon3:c.347G>A:p.R116Q,TP53:NM_001126117:exon3:c.347G>A:p.R116Q,TP53:NM_001276697:exon3:c.266G>A:p.R89Q,TP53:NM_001276698:exon3:c.266G>A:p.R89Q,TP53:NM_001276699:exon3:c.266G>A:p.R89Q,TP53:NM_001126118:exon6:c.626G>A:p.R209Q,TP53:NM_000546:exon7:c.743G>A:p.R248Q,TP53:NM_001126112:exon7:c.743G>A:p.R248Q,TP53:NM_001126113:exon7:c.743G>A:p.R…	1.193e-05	2.637e-05	7.358e-06	1.731e-05	2.386e-05	0	0	0	0	2.637e-05	0	0	0	2.687e-05	2.233e-05	1.947e-05	2.338e-05	-	-	-	-	-	-	-	-	-	-	-	-	-	-	-	-	-	large_intestine	17
12	25378562	25378562	C	T	exonic	KRAS	-	nonsynonymous SNV	KRAS:NM_001369786:exon4:c.436G>A:p.A146T,KRAS:NM_001369787:exon4:c.436G>A:p.A146T,KRAS:NM_004985:exon4:c.436G>A:p.A146T,KRAS:NM_033360:exon4:c.436G>A:p.A146T	-	-	-	-	-	-	-	-	-	-	-	-	-	-	-	-	-	-	-	-	-	-	-	-	-	-	-	-	-	-	-	-	-	-	large_intestine	16
17	7577539	7577539	G	A	exonic	TP53	-	nonsynonymous SNV	TP53:NM_001126115:exon3:c.346C>T:p.R116W,TP53:NM_001126116:exon3:c.346C>T:p.R116W,TP53:NM_001126117:exon3:c.346C>T:p.R116W,TP53:NM_001276697:exon3:c.265C>T:p.R89W,TP53:NM_001276698:exon3:c.265C>T:p.R89W,TP53:NM_001276699:exon3:c.265C>T:p.R89W,TP53:NM_001126118:exon6:c.625C>T:p.R209W,TP53:NM_000546:exon7:c.742C>T:p.R248W,TP53:NM_001126112:exon7:c.742C>T:p.R248W,TP53:NM_001126113:exon7:c.742C>T:p.R…	3.977e-06	8.791e-06	7.358e-06	0	1.193e-05	0	0	0	0	8.791e-06	0	0	0	8.955e-06	1.117e-05	9.733e-06	2.338e-05	-	-	-	-	-	-	-	-	-	-	-	-	-	-	-	-	-	large_intestine	14
17	7577121	7577121	G	A	exonic	TP53	-	nonsynonymous SNV	TP53:NM_001126115:exon4:c.421C>T:p.R141C,TP53:NM_001126116:exon4:c.421C>T:p.R141C,TP53:NM_001126117:exon4:c.421C>T:p.R141C,TP53:NM_001276697:exon4:c.340C>T:p.R114C,TP53:NM_001276698:exon4:c.340C>T:p.R114C,TP53:NM_001276699:exon4:c.340C>T:p.R114C,TP53:NM_001126118:exon7:c.700C>T:p.R234C,TP53:NM_000546:exon8:c.817C>T:p.R273C,TP53:NM_001126112:exon8:c.817C>T:p.R273C,TP53:NM_001126113:exon8:c.817C>T:…	1.196e-05	5.443e-05	1.475e-05	8.679e-06	1.193e-05	0	0	0	5.443e-05	8.818e-06	4.631e-05	0	0	5.444e-05	7.459e-05	5.658e-05	.	0	.	0	0	3.183e-05	0	.	0	0	0	0	0	0	.	.	.	.	large_intestine	13
3	178936082	178936082	G	A	exonic	PIK3CA	-	nonsynonymous SNV	PIK3CA:NM_006218:exon10:c.1624G>A:p.E542K	-	-	-	-	-	-	-	-	-	-	-	-	-	-	-	-	-	-	-	-	-	-	-	-	-	-	-	-	-	-	-	-	-	-	large_intestine	13
2	70315174	70315174	T	A	exonic	PCBP1	-	nonsynonymous SNV	PCBP1:NM_006196:exon1:c.299T>A:p.L100Q	0	.	0	0	3.976e-06	0	0	0	0	0	0	0	0	.	.	.	.	-	-	-	-	-	-	-	-	-	-	-	-	-	-	-	-	-	large_intestine	11
2	70315174	70315174	T	C	exonic	PCBP1	-	nonsynonymous SNV	PCBP1:NM_006196:exon1:c.299T>C:p.L100P	0	.	0	0	3.976e-06	0	0	0	0	0	0	0	0	.	.	.	.	-	-	-	-	-	-	-	-	-	-	-	-	-	-	-	-	-	large_intestine	2
4	153249384	153249384	C	T	exonic	FBXW7	-	nonsynonymous SNV	FBXW7:NM_001013415:exon8:c.1040G>A:p.R347H,FBXW7:NM_018315:exon8:c.1154G>A:p.R385H,FBXW7:NM_033632:exon9:c.1394G>A:p.R465H,FBXW7:NM_001349798:exon11:c.1394G>A:p.R465H	0	.	0	0	1.591e-05	0	0	0	0	0	0	0	0	.	.	.	.	-	-	-	-	-	-	-	-	-	-	-	-	-	-	-	-	-	large_intestine	11
1	115258747	115258747	C	T	exonic	NRAS	-	nonsynonymous SNV	NRAS:NM_002524:exon2:c.35G>A:p.G12D	7.953e-06	8.79e-06	0	1.731e-05	2.386e-05	0	0	0	0	8.79e-06	4.619e-05	0	0	.	1.117e-05	9.733e-06	.	-	-	-	-	-	-	-	-	-	-	-	-	-	-	-	-	-	large_intestine	8
1	115258747	115258747	C	G	exonic	NRAS	-	nonsynonymous SNV	NRAS:NM_002524:exon2:c.35G>C:p.G12A	-	-	-	-	-	-	-	-	-	-	-	-	-	-	-	-	-	-	-	-	-	-	-	-	-	-	-	-	-	-	-	-	-	-	large_intestine	1
1	115258747	115258747	C	A	exonic	NRAS	-	nonsynonymous SNV	NRAS:NM_002524:exon2:c.35G>T:p.G12V	0	.	0	0	3.976e-06	0	0	0	0	0	0	0	0	.	.	.	.	-	-	-	-	-	-	-	-	-	-	-	-	-	-	-	-	-	large_intestine	1
1	115256530	115256530	G	T	exonic	NRAS	-	nonsynonymous SNV	NRAS:NM_002524:exon3:c.181C>A:p.Q61K	0	.	0	0	3.976e-06	0	0	0	0	0	0	0	0	.	.	.	.	-	-	-	-	-	-	-	-	-	-	-	-	-	-	-	-	-	large_intestine	10
18	48591919	48591919	G	A	exonic	SMAD4	-	nonsynonymous SNV	SMAD4:NM_005359:exon9:c.1082G>A:p.R361H	-	-	-	-	-	-	-	-	-	-	-	-	-	-	-	-	-	-	-	-	-	-	-	-	-	-	-	-	-	-	-	-	-	-	large_intestine	10
3	178916876	178916876	G	A	exonic	PIK3CA	-	nonsynonymous SNV	PIK3CA:NM_006218:exon2:c.263G>A:p.R88Q	-	-	-	-	-	-	-	-	-	-	-	-	-	-	-	-	-	-	-	-	-	-	-	-	-	-	-	-	-	-	-	-	-	-	large_intestine	9
4	153249385	153249385	G	A	exonic	FBXW7	-	nonsynonymous SNV	FBXW7:NM_001013415:exon8:c.1039C>T:p.R347C,FBXW7:NM_018315:exon8:c.1153C>T:p.R385C,FBXW7:NM_033632:exon9:c.1393C>T:p.R465C,FBXW7:NM_001349798:exon11:c.1393C>T:p.R465C	4.325e-06	3.714e-05	7.969e-06	0	2.386e-05	0	3.714e-05	0	0	0	0	0	0	3.714e-05	3.715e-05	3.726e-05	7.169e-05	-	-	-	-	-	-	-	-	-	-	-	-	-	-	-	-	-	large_intestine	9
2	70315180	70315180	T	C	exonic	PCBP1	-	nonsynonymous SNV	PCBP1:NM_006196:exon1:c.305T>C:p.L102P	-	-	-	-	-	-	-	-	-	-	-	-	-	-	-	-	-	-	-	-	-	-	-	-	-	-	-	-	-	-	-	-	-	-	large_intestine	3
2	70315180	70315180	T	A	exonic	PCBP1	-	nonsynonymous SNV	PCBP1:NM_006196:exon1:c.305T>A:p.L102Q	-	-	-	-	-	-	-	-	-	-	-	-	-	-	-	-	-	-	-	-	-	-	-	-	-	-	-	-	-	-	-	-	-	-	large_intestine	3
2	70315180	70315180	T	G	exonic	PCBP1	-	nonsynonymous SNV	PCBP1:NM_006196:exon1:c.305T>G:p.L102R	-	-	-	-	-	-	-	-	-	-	-	-	-	-	-	-	-	-	-	-	-	-	-	-	-	-	-	-	-	-	-	-	-	-	large_intestine	1
20	57484421	57484421	G	A	exonic	GNAS	-	nonsynonymous SNV	GNAS:NM_001077489:exon7:c.557G>A:p.R186H,GNAS:NM_080426:exon7:c.560G>A:p.R187H,GNAS:NM_000516:exon8:c.602G>A:p.R201H,GNAS:NM_001077488:exon8:c.605G>A:p.R202H,GNAS:NM_001309840:exon8:c.425G>A:p.R142H,GNAS:NM_001309861:exon8:c.425G>A:p.R142H,GNAS:NM_080425:exon8:c.2531G>A:p.R844H	1.591e-05	2.891e-05	2.943e-05	0	7.157e-05	0	0	2.891e-05	0	1.758e-05	0	9.923e-05	0	2.902e-05	3.277e-05	2.919e-05	.	-	-	-	-	-	-	-	-	-	-	-	-	-	-	-	-	-	large_intestine	6
20	57484421	57484421	G	T	exonic	GNAS	-	nonsynonymous SNV	GNAS:NM_001077489:exon7:c.557G>T:p.R186L,GNAS:NM_080426:exon7:c.560G>T:p.R187L,GNAS:NM_000516:exon8:c.602G>T:p.R201L,GNAS:NM_001077488:exon8:c.605G>T:p.R202L,GNAS:NM_001309840:exon8:c.425G>T:p.R142L,GNAS:NM_001309861:exon8:c.425G>T:p.R142L,GNAS:NM_080425:exon8:c.2531G>T:p.R844L	-	-	-	-	-	-	-	-	-	-	-	-	-	-	-	-	-	-	-	-	-	-	-	-	-	-	-	-	-	-	-	-	-	-	large_intestine	1
17	7577548	7577548	C	T	exonic	TP53	-	nonsynonymous SNV	TP53:NM_001126115:exon3:c.337G>A:p.G113S,TP53:NM_001126116:exon3:c.337G>A:p.G113S,TP53:NM_001126117:exon3:c.337G>A:p.G113S,TP53:NM_001276697:exon3:c.256G>A:p.G86S,TP53:NM_001276698:exon3:c.256G>A:p.G86S,TP53:NM_001276699:exon3:c.256G>A:p.G86S,TP53:NM_001126118:exon6:c.616G>A:p.G206S,TP53:NM_000546:exon7:c.733G>A:p.G245S,TP53:NM_001126112:exon7:c.733G>A:p.G245S,TP53:NM_001126113:exon7:c.733G>A:p.G…	0	.	0	0	7.952e-06	0	0	0	0	0	0	0	0	.	.	.	.	3.193e-05	0.0001	5.733e-05	0	3.183e-05	0.0001	.	0	0	0	0	0	0	0.0001	.	.	.	large_intestine	7
4	153245446	153245446	G	A	exonic	FBXW7	-	nonsynonymous SNV	FBXW7:NM_001013415:exon10:c.1391C>T:p.S464L,FBXW7:NM_018315:exon10:c.1505C>T:p.S502L,FBXW7:NM_033632:exon11:c.1745C>T:p.S582L,FBXW7:NM_001349798:exon13:c.1745C>T:p.S582L	-	-	-	-	-	-	-	-	-	-	-	-	-	-	-	-	-	-	-	-	-	-	-	-	-	-	-	-	-	-	-	-	-	-	large_intestine	6
4	153247289	153247289	G	A	exonic	FBXW7	-	nonsynonymous SNV	FBXW7:NM_001013415:exon9:c.1159C>T:p.R387C,FBXW7:NM_018315:exon9:c.1273C>T:p.R425C,FBXW7:NM_033632:exon10:c.1513C>T:p.R505C,FBXW7:NM_001349798:exon12:c.1513C>T:p.R505C	0	.	0	0	3.976e-06	0	0	0	0	0	0	0	0	.	.	.	.	-	-	-	-	-	-	-	-	-	-	-	-	-	-	-	-	-	large_intestine	5
4	153247289	153247289	G	C	exonic	FBXW7	-	nonsynonymous SNV	FBXW7:NM_001013415:exon9:c.1159C>G:p.R387G,FBXW7:NM_018315:exon9:c.1273C>G:p.R425G,FBXW7:NM_033632:exon10:c.1513C>G:p.R505G,FBXW7:NM_001349798:exon12:c.1513C>G:p.R505G	-	-	-	-	-	-	-	-	-	-	-	-	-	-	-	-	-	-	-	-	-	-	-	-	-	-	-	-	-	-	-	-	-	-	large_intestine	1
7	74239465	74239465	A	G	exonic	GTF2IRD2	-	nonsynonymous SNV	GTF2IRD2:NM_001368300:exon4:c.841T>C:p.Y281H,GTF2IRD2:NM_173537:exon4:c.355T>C:p.Y119H	0.0004	0.0012	0.0003	0.0004	0.0007	0.0012	0.0008	0.0005	0.0003	0.0002	0	0	0.0004	0.0015	0.0012	0.0013	0.0012	-	-	-	-	-	-	-	-	-	-	-	-	-	-	-	-	-	large_intestine	6
12	56478854	56478854	G	A	exonic	ERBB3	-	nonsynonymous SNV	ERBB3:NM_001005915:exon3:c.310G>A:p.V104M,ERBB3:NM_001982:exon3:c.310G>A:p.V104M	-	-	-	-	-	-	-	-	-	-	-	-	-	-	-	-	-	-	-	-	-	-	-	-	-	-	-	-	-	-	-	-	-	-	large_intestine	6
17	7577141	7577141	C	A	exonic	TP53	-	nonsynonymous SNV	TP53:NM_001126115:exon4:c.401G>T:p.G134V,TP53:NM_001126116:exon4:c.401G>T:p.G134V,TP53:NM_001126117:exon4:c.401G>T:p.G134V,TP53:NM_001276697:exon4:c.320G>T:p.G107V,TP53:NM_001276698:exon4:c.320G>T:p.G107V,TP53:NM_001276699:exon4:c.320G>T:p.G107V,TP53:NM_001126118:exon7:c.680G>T:p.G227V,TP53:NM_000546:exon8:c.797G>T:p.G266V,TP53:NM_001126112:exon8:c.797G>T:p.G266V,TP53:NM_001126113:exon8:c.797G>T:…	0	.	0	0	7.952e-06	0	0	0	0	0	0	0	0	.	.	.	.	-	-	-	-	-	-	-	-	-	-	-	-	-	-	-	-	-	large_intestine	3
17	7577141	7577141	C	T	exonic	TP53	-	nonsynonymous SNV	TP53:NM_001126115:exon4:c.401G>A:p.G134E,TP53:NM_001126116:exon4:c.401G>A:p.G134E,TP53:NM_001126117:exon4:c.401G>A:p.G134E,TP53:NM_001276697:exon4:c.320G>A:p.G107E,TP53:NM_001276698:exon4:c.320G>A:p.G107E,TP53:NM_001276699:exon4:c.320G>A:p.G107E,TP53:NM_001126118:exon7:c.680G>A:p.G227E,TP53:NM_000546:exon8:c.797G>A:p.G266E,TP53:NM_001126112:exon8:c.797G>A:p.G266E,TP53:NM_001126113:exon8:c.797G>A:…	-	-	-	-	-	-	-	-	-	-	-	-	-	-	-	-	-	-	-	-	-	-	-	-	-	-	-	-	-	-	-	-	-	-	large_intestine	2
10	114925333	114925333	C	T	exonic	TCF7L2	-	nonsynonymous SNV	TCF7L2:NM_001146285:exon13:c.1342C>T:p.R448C,TCF7L2:NM_001198526:exon13:c.1342C>T:p.R448C,TCF7L2:NM_001146274:exon14:c.1411C>T:p.R471C,TCF7L2:NM_030756:exon14:c.1393C>T:p.R465C,TCF7L2:NM_001367943:exon15:c.1462C>T:p.R488C	0	.	0	0	3.976e-06	0	0	0	0	0	0	0	0	.	.	.	.	-	-	-	-	-	-	-	-	-	-	-	-	-	-	-	-	-	large_intestine	4
10	114925333	114925333	C	A	exonic	TCF7L2	-	nonsynonymous SNV	TCF7L2:NM_001198530:exon11:c.1167C>A:p.F389L,TCF7L2:NM_001146286:exon12:c.1269C>A:p.F423L,TCF7L2:NM_001146283:exon13:c.1410C>A:p.F470L,TCF7L2:NM_001146284:exon13:c.1308C>A:p.F436L,TCF7L2:NM_001146285:exon13:c.1342C>A:p.R448S,TCF7L2:NM_001198526:exon13:c.1342C>A:p.R448S,TCF7L2:NM_001198529:exon13:c.1320C>A:p.F440L,TCF7L2:NM_001198531:exon13:c.1338C>A:p.F446L,TCF7L2:NM_001146274:exon14:c.1411C>A:p.…	-	-	-	-	-	-	-	-	-	-	-	-	-	-	-	-	-	-	-	-	-	-	-	-	-	-	-	-	-	-	-	-	-	-	large_intestine	1
19	52715982	52715982	C	T	exonic	PPP2R1A	-	nonsynonymous SNV	PPP2R1A:NM_001363656:exon5:c.10C>T:p.R4W,PPP2R1A:NM_014225:exon5:c.547C>T:p.R183W	-	-	-	-	-	-	-	-	-	-	-	-	-	-	-	-	-	-	-	-	-	-	-	-	-	-	-	-	-	-	-	-	-	-	large_intestine	5
2	223066812	223066812	G	A	exonic	PAX3	-	nonsynonymous SNV	PAX3:NM_001127366:exon8:c.1268C>T:p.T423M,PAX3:NM_181457:exon8:c.1271C>T:p.T424M,PAX3:NM_181458:exon8:c.1271C>T:p.T424M,PAX3:NM_181459:exon8:c.1271C>T:p.T424M	1.994e-05	0.0001	2.213e-05	1.735e-05	1.988e-05	0	0	0.0001	0	8.824e-06	0	0	0	0.0001	0.0001	0.0001	0.0002	-	-	-	-	-	-	-	-	-	-	-	-	-	-	-	-	-	large_intestine	5
11	108117798	108117798	C	T	exonic	ATM	-	nonsynonymous SNV	ATM:NM_000051:exon8:c.1009C>T:p.R337C,ATM:NM_001351834:exon9:c.1009C>T:p.R337C	8.759e-05	0.0002	9.575e-05	7.799e-05	8.748e-05	0	6.533e-05	0.0002	5.44e-05	9.688e-05	0	0	0.0002	0.0002	0.0001	0.0002	0.0002	0.0001	0.0002	0.0001	0.0001	0.0001	0.0001	.	0	0	0.0002	0	0	0	0.0002	0.0001	.	0.0002	large_intestine	5
12	25380277	25380277	G	T	exonic	KRAS	-	nonsynonymous SNV	KRAS:NM_001369786:exon3:c.181C>A:p.Q61K,KRAS:NM_001369787:exon3:c.181C>A:p.Q61K,KRAS:NM_004985:exon3:c.181C>A:p.Q61K,KRAS:NM_033360:exon3:c.181C>A:p.Q61K	-	-	-	-	-	-	-	-	-	-	-	-	-	-	-	-	-	-	-	-	-	-	-	-	-	-	-	-	-	-	-	-	-	-	large_intestine	4
12	25380277	25380277	G	C	exonic	KRAS	-	nonsynonymous SNV	KRAS:NM_001369786:exon3:c.181C>G:p.Q61E,KRAS:NM_001369787:exon3:c.181C>G:p.Q61E,KRAS:NM_004985:exon3:c.181C>G:p.Q61E,KRAS:NM_033360:exon3:c.181C>G:p.Q61E	-	-	-	-	-	-	-	-	-	-	-	-	-	-	-	-	-	-	-	-	-	-	-	-	-	-	-	-	-	-	-	-	-	-	large_intestine	1
3	150421525	150421525	T	A	exonic	ERICH6	-	nonsynonymous SNV	ERICH6:NM_152394:exon1:c.161A>T:p.E54V	5.303e-06	1.197e-05	1.001e-05	0	3.982e-05	0	0	0	0	1.197e-05	0	0	0	1.224e-05	1.519e-05	1.327e-05	3.304e-05	-	-	-	-	-	-	-	-	-	-	-	-	-	-	-	-	-	large_intestine	4
12	25378647	25378647	T	A	exonic	KRAS	-	nonsynonymous SNV	KRAS:NM_001369786:exon4:c.351A>T:p.K117N,KRAS:NM_001369787:exon4:c.351A>T:p.K117N,KRAS:NM_004985:exon4:c.351A>T:p.K117N,KRAS:NM_033360:exon4:c.351A>T:p.K117N	-	-	-	-	-	-	-	-	-	-	-	-	-	-	-	-	-	-	-	-	-	-	-	-	-	-	-	-	-	-	-	-	-	-	large_intestine	3
12	25378647	25378647	T	G	exonic	KRAS	-	nonsynonymous SNV	KRAS:NM_001369786:exon4:c.351A>C:p.K117N,KRAS:NM_001369787:exon4:c.351A>C:p.K117N,KRAS:NM_004985:exon4:c.351A>C:p.K117N,KRAS:NM_033360:exon4:c.351A>C:p.K117N	3.982e-06	3.268e-05	7.366e-06	0	7.953e-06	0	3.268e-05	0	0	0	0	0	0	3.268e-05	3.268e-05	3.277e-05	6.374e-05	-	-	-	-	-	-	-	-	-	-	-	-	-	-	-	-	-	large_intestine	1
3	178927980	178927980	T	C	exonic	PIK3CA	-	nonsynonymous SNV	PIK3CA:NM_006218:exon8:c.1258T>C:p.C420R	-	-	-	-	-	-	-	-	-	-	-	-	-	-	-	-	-	-	-	-	-	-	-	-	-	-	-	-	-	-	-	-	-	-	large_intestine	4
12	25380276	25380276	T	C	exonic	KRAS	-	nonsynonymous SNV	KRAS:NM_001369786:exon3:c.182A>G:p.Q61R,KRAS:NM_001369787:exon3:c.182A>G:p.Q61R,KRAS:NM_004985:exon3:c.182A>G:p.Q61R,KRAS:NM_033360:exon3:c.182A>G:p.Q61R	-	-	-	-	-	-	-	-	-	-	-	-	-	-	-	-	-	-	-	-	-	-	-	-	-	-	-	-	-	-	-	-	-	-	large_intestine	2
12	25380276	25380276	T	A	exonic	KRAS	-	nonsynonymous SNV	KRAS:NM_001369786:exon3:c.182A>T:p.Q61L,KRAS:NM_001369787:exon3:c.182A>T:p.Q61L,KRAS:NM_004985:exon3:c.182A>T:p.Q61L,KRAS:NM_033360:exon3:c.182A>T:p.Q61L	-	-	-	-	-	-	-	-	-	-	-	-	-	-	-	-	-	-	-	-	-	-	-	-	-	-	-	-	-	-	-	-	-	-	large_intestine	1
12	25380276	25380276	T	G	exonic	KRAS	-	nonsynonymous SNV	KRAS:NM_001369786:exon3:c.182A>C:p.Q61P,KRAS:NM_001369787:exon3:c.182A>C:p.Q61P,KRAS:NM_004985:exon3:c.182A>C:p.Q61P,KRAS:NM_033360:exon3:c.182A>C:p.Q61P	-	-	-	-	-	-	-	-	-	-	-	-	-	-	-	-	-	-	-	-	-	-	-	-	-	-	-	-	-	-	-	-	-	-	large_intestine	1
10	11990443	11990443	T	A	exonic	UPF2	-	nonsynonymous SNV	UPF2:NM_015542:exon16:c.3099A>T:p.E1033D,UPF2:NM_080599:exon16:c.3099A>T:p.E1033D	4.041e-06	2.9e-05	7.461e-06	0	8.026e-06	0	0	2.9e-05	0	0	0	0	0	2.912e-05	3.288e-05	2.928e-05	5.857e-05	-	-	-	-	-	-	-	-	-	-	-	-	-	-	-	-	-	large_intestine	4
14	105246551	105246551	C	T	exonic	AKT1	-	nonsynonymous SNV	AKT1:NM_001014431:exon3:c.49G>A:p.E17K,AKT1:NM_005163:exon3:c.49G>A:p.E17K,AKT1:NM_001014432:exon4:c.49G>A:p.E17K	4e-06	8.872e-06	0	8.729e-06	3.977e-06	0	0	0	0	8.872e-06	0	0	0	9.039e-06	1.128e-05	.	.	-	-	-	-	-	-	-	-	-	-	-	-	-	-	-	-	-	large_intestine	4
12	25380275	25380275	T	G	exonic	KRAS	-	nonsynonymous SNV	KRAS:NM_001369786:exon3:c.183A>C:p.Q61H,KRAS:NM_001369787:exon3:c.183A>C:p.Q61H,KRAS:NM_004985:exon3:c.183A>C:p.Q61H,KRAS:NM_033360:exon3:c.183A>C:p.Q61H	3.979e-06	.	7.363e-06	0	3.976e-06	0	0	0	0	0	0	9.925e-05	0	.	.	.	.	-	-	-	-	-	-	-	-	-	-	-	-	-	-	-	-	-	large_intestine	3
12	25380275	25380275	T	A	exonic	KRAS	-	nonsynonymous SNV	KRAS:NM_001369786:exon3:c.183A>T:p.Q61H,KRAS:NM_001369787:exon3:c.183A>T:p.Q61H,KRAS:NM_004985:exon3:c.183A>T:p.Q61H,KRAS:NM_033360:exon3:c.183A>T:p.Q61H	-	-	-	-	-	-	-	-	-	-	-	-	-	-	-	-	-	-	-	-	-	-	-	-	-	-	-	-	-	-	-	-	-	-	large_intestine	1
5	83402535	83402535	G	A	exonic	EDIL3	-	nonsynonymous SNV	EDIL3:NM_001278642:exon5:c.553C>T:p.R185C,EDIL3:NM_005711:exon6:c.583C>T:p.R195C	-	-	-	-	-	-	-	-	-	-	-	-	-	-	-	-	-	-	-	-	-	-	-	-	-	-	-	-	-	-	-	-	-	-	large_intestine	4
17	7578403	7578403	C	T	exonic	TP53	-	nonsynonymous SNV	TP53:NM_001126115:exon1:c.131G>A:p.C44Y,TP53:NM_001126116:exon1:c.131G>A:p.C44Y,TP53:NM_001126117:exon1:c.131G>A:p.C44Y,TP53:NM_001276697:exon1:c.50G>A:p.C17Y,TP53:NM_001276698:exon1:c.50G>A:p.C17Y,TP53:NM_001276699:exon1:c.50G>A:p.C17Y,TP53:NM_001126118:exon4:c.410G>A:p.C137Y,TP53:NM_000546:exon5:c.527G>A:p.C176Y,TP53:NM_001126112:exon5:c.527G>A:p.C176Y,TP53:NM_001126113:exon5:c.527G>A:p.C176Y,T…	-	-	-	-	-	-	-	-	-	-	-	-	-	-	-	-	-	-	-	-	-	-	-	-	-	-	-	-	-	-	-	-	-	-	large_intestine	2
17	7578403	7578403	C	A	exonic	TP53	-	nonsynonymous SNV	TP53:NM_001126115:exon1:c.131G>T:p.C44F,TP53:NM_001126116:exon1:c.131G>T:p.C44F,TP53:NM_001126117:exon1:c.131G>T:p.C44F,TP53:NM_001276697:exon1:c.50G>T:p.C17F,TP53:NM_001276698:exon1:c.50G>T:p.C17F,TP53:NM_001276699:exon1:c.50G>T:p.C17F,TP53:NM_001126118:exon4:c.410G>T:p.C137F,TP53:NM_000546:exon5:c.527G>T:p.C176F,TP53:NM_001126112:exon5:c.527G>T:p.C176F,TP53:NM_001126113:exon5:c.527G>T:p.C176F,T…	3.98e-06	8.803e-06	7.362e-06	0	3.976e-06	0	0	0	0	8.803e-06	0	0	0	8.967e-06	1.118e-05	9.747e-06	.	-	-	-	-	-	-	-	-	-	-	-	-	-	-	-	-	-	large_intestine	2
3	41266124	41266124	A	G	exonic	CTNNB1	-	nonsynonymous SNV	CTNNB1:NM_001098209:exon3:c.121A>G:p.T41A,CTNNB1:NM_001098210:exon3:c.121A>G:p.T41A,CTNNB1:NM_001904:exon3:c.121A>G:p.T41A,CTNNB1:NM_001330729:exon4:c.100A>G:p.T34A	-	-	-	-	-	-	-	-	-	-	-	-	-	-	-	-	-	-	-	-	-	-	-	-	-	-	-	-	-	-	-	-	-	-	large_intestine	4
3	178952084	178952084	C	T	exonic	PIK3CA	-	nonsynonymous SNV	PIK3CA:NM_006218:exon21:c.3139C>T:p.H1047Y	-	-	-	-	-	-	-	-	-	-	-	-	-	-	-	-	-	-	-	-	-	-	-	-	-	-	-	-	-	-	-	-	-	-	large_intestine	4
17	7577106	7577106	G	C	exonic	TP53	-	nonsynonymous SNV	TP53:NM_001126115:exon4:c.436C>G:p.P146A,TP53:NM_001126116:exon4:c.436C>G:p.P146A,TP53:NM_001126117:exon4:c.436C>G:p.P146A,TP53:NM_001276697:exon4:c.355C>G:p.P119A,TP53:NM_001276698:exon4:c.355C>G:p.P119A,TP53:NM_001276699:exon4:c.355C>G:p.P119A,TP53:NM_001126118:exon7:c.715C>G:p.P239A,TP53:NM_000546:exon8:c.832C>G:p.P278A,TP53:NM_001126112:exon8:c.832C>G:p.P278A,TP53:NM_001126113:exon8:c.832C>G:…	-	-	-	-	-	-	-	-	-	-	-	-	-	-	-	-	-	-	-	-	-	-	-	-	-	-	-	-	-	-	-	-	-	-	large_intestine	2
17	7577106	7577106	G	T	exonic	TP53	-	nonsynonymous SNV	TP53:NM_001126115:exon4:c.436C>A:p.P146T,TP53:NM_001126116:exon4:c.436C>A:p.P146T,TP53:NM_001126117:exon4:c.436C>A:p.P146T,TP53:NM_001276697:exon4:c.355C>A:p.P119T,TP53:NM_001276698:exon4:c.355C>A:p.P119T,TP53:NM_001276699:exon4:c.355C>A:p.P119T,TP53:NM_001126118:exon7:c.715C>A:p.P239T,TP53:NM_000546:exon8:c.832C>A:p.P278T,TP53:NM_001126112:exon8:c.832C>A:p.P278T,TP53:NM_001126113:exon8:c.832C>A:…	-	-	-	-	-	-	-	-	-	-	-	-	-	-	-	-	-	-	-	-	-	-	-	-	-	-	-	-	-	-	-	-	-	-	large_intestine	2
1	115256529	115256529	T	C	exonic	NRAS	-	nonsynonymous SNV	NRAS:NM_002524:exon3:c.182A>G:p.Q61R	-	-	-	-	-	-	-	-	-	-	-	-	-	-	-	-	-	-	-	-	-	-	-	-	-	-	-	-	-	-	-	-	-	-	large_intestine	3
1	115256529	115256529	T	A	exonic	NRAS	-	nonsynonymous SNV	NRAS:NM_002524:exon3:c.182A>T:p.Q61L	-	-	-	-	-	-	-	-	-	-	-	-	-	-	-	-	-	-	-	-	-	-	-	-	-	-	-	-	-	-	-	-	-	-	large_intestine	1
17	7577114	7577114	C	T	exonic	TP53	-	nonsynonymous SNV	TP53:NM_001126115:exon4:c.428G>A:p.C143Y,TP53:NM_001126116:exon4:c.428G>A:p.C143Y,TP53:NM_001126117:exon4:c.428G>A:p.C143Y,TP53:NM_001276697:exon4:c.347G>A:p.C116Y,TP53:NM_001276698:exon4:c.347G>A:p.C116Y,TP53:NM_001276699:exon4:c.347G>A:p.C116Y,TP53:NM_001126118:exon7:c.707G>A:p.C236Y,TP53:NM_000546:exon8:c.824G>A:p.C275Y,TP53:NM_001126112:exon8:c.824G>A:p.C275Y,TP53:NM_001126113:exon8:c.824G>A:…	-	-	-	-	-	-	-	-	-	-	-	-	-	-	-	-	-	3.186e-05	6.487e-05	0	7.182e-05	3.183e-05	0	.	0	0	6.487e-05	0	0	0	9.03e-05	7.35e-05	.	0.0002	large_intestine	4
17	37881332	37881332	G	A	exonic	ERBB2	-	nonsynonymous SNV	ERBB2:NM_001289937:exon21:c.2524G>A:p.V842I,ERBB2:NM_004448:exon21:c.2524G>A:p.V842I,ERBB2:NM_001005862:exon24:c.2434G>A:p.V812I,ERBB2:NM_001289936:exon25:c.2479G>A:p.V827I	3.978e-06	8.793e-06	0	8.656e-06	3.976e-06	0	0	0	0	8.793e-06	0	0	0	8.958e-06	1.117e-05	9.734e-06	.	-	-	-	-	-	-	-	-	-	-	-	-	-	-	-	-	-	large_intestine	4
3	178936094	178936094	C	A	exonic	PIK3CA	-	nonsynonymous SNV	PIK3CA:NM_006218:exon10:c.1636C>A:p.Q546K	-	-	-	-	-	-	-	-	-	-	-	-	-	-	-	-	-	-	-	-	-	-	-	-	-	-	-	-	-	-	-	-	-	-	large_intestine	3
3	178936094	178936094	C	G	exonic	PIK3CA	-	nonsynonymous SNV	PIK3CA:NM_006218:exon10:c.1636C>G:p.Q546E	-	-	-	-	-	-	-	-	-	-	-	-	-	-	-	-	-	-	-	-	-	-	-	-	-	-	-	-	-	-	-	-	-	-	large_intestine	1
3	25668727	25668727	C	T	exonic	TOP2B	-	nonsynonymous SNV	TOP2B:NM_001068:exon16:c.1952G>A:p.R651H,TOP2B:NM_001330700:exon16:c.1967G>A:p.R656H	4.065e-06	8.918e-06	0	8.904e-06	1.601e-05	0	0	0	0	8.918e-06	0	0	0	9.084e-06	1.132e-05	9.884e-06	2.363e-05	-	-	-	-	-	-	-	-	-	-	-	-	-	-	-	-	-	large_intestine	4
6	70423652	70423652	C	T	exonic	LMBRD1	-	nonsynonymous SNV	LMBRD1:NM_001363722:exon9:c.581G>A:p.R194H,LMBRD1:NM_001367271:exon9:c.581G>A:p.R194H,LMBRD1:NM_001367272:exon9:c.581G>A:p.R194H,LMBRD1:NM_018368:exon9:c.800G>A:p.R267H	7.971e-06	1.764e-05	0	1.734e-05	7.953e-06	0	0	0	0	1.764e-05	0	0	0	8.986e-06	2.234e-05	1.954e-05	2.339e-05	-	-	-	-	-	-	-	-	-	-	-	-	-	-	-	-	-	large_intestine	4
1	237947200	237947200	C	T	exonic	RYR2	-	nonsynonymous SNV	RYR2:NM_001035:exon90:c.12188C>T:p.T4063M	0	.	0	0	7.997e-06	0	0	0	0	0	0	0	0	.	.	.	.	-	-	-	-	-	-	-	-	-	-	-	-	-	-	-	-	-	large_intestine	4
18	48604787	48604787	G	C	exonic	SMAD4	-	nonsynonymous SNV	SMAD4:NM_005359:exon12:c.1609G>C:p.D537H	-	-	-	-	-	-	-	-	-	-	-	-	-	-	-	-	-	-	-	-	-	-	-	-	-	-	-	-	-	-	-	-	-	-	large_intestine	3
18	48604787	48604787	G	T	exonic	SMAD4	-	nonsynonymous SNV	SMAD4:NM_005359:exon12:c.1609G>T:p.D537Y	-	-	-	-	-	-	-	-	-	-	-	-	-	-	-	-	-	-	-	-	-	-	-	-	-	-	-	-	-	-	-	-	-	-	large_intestine	1
3	136287655	136287655	C	T	exonic	STAG1	-	nonsynonymous SNV	STAG1:NM_005862:exon5:c.346G>A:p.A116T	7.96e-06	1.76e-05	0	1.732e-05	7.953e-06	0	0	0	0	1.76e-05	0	0	0	1.793e-05	2.235e-05	9.742e-06	2.34e-05	-	-	-	-	-	-	-	-	-	-	-	-	-	-	-	-	-	large_intestine	4
3	178938934	178938934	G	A	exonic	PIK3CA	-	nonsynonymous SNV	PIK3CA:NM_006218:exon14:c.2176G>A:p.E726K	-	-	-	-	-	-	-	-	-	-	-	-	-	-	-	-	-	-	-	-	-	-	-	-	-	-	-	-	-	-	-	-	-	-	large_intestine	4
18	48591918	48591918	C	T	exonic	SMAD4	-	nonsynonymous SNV	SMAD4:NM_005359:exon9:c.1081C>T:p.R361C	0	.	0	0	3.976e-06	0	0	0	0	0	0	0	0	.	.	.	.	-	-	-	-	-	-	-	-	-	-	-	-	-	-	-	-	-	large_intestine	4
3	41266137	41266137	C	T	exonic	CTNNB1	-	nonsynonymous SNV	CTNNB1:NM_001098209:exon3:c.134C>T:p.S45F,CTNNB1:NM_001098210:exon3:c.134C>T:p.S45F,CTNNB1:NM_001904:exon3:c.134C>T:p.S45F,CTNNB1:NM_001330729:exon4:c.113C>T:p.S38F	-	-	-	-	-	-	-	-	-	-	-	-	-	-	-	-	-	-	-	-	-	-	-	-	-	-	-	-	-	-	-	-	-	-	large_intestine	3
4	153244092	153244092	G	A	exonic	FBXW7	-	nonsynonymous SNV	FBXW7:NM_001013415:exon11:c.1711C>T:p.R571W,FBXW7:NM_018315:exon11:c.1825C>T:p.R609W,FBXW7:NM_033632:exon12:c.2065C>T:p.R689W,FBXW7:NM_001349798:exon14:c.2065C>T:p.R689W	-	-	-	-	-	-	-	-	-	-	-	-	-	-	-	-	-	-	-	-	-	-	-	-	-	-	-	-	-	-	-	-	-	-	large_intestine	3
1	238053923	238053923	G	A	exonic	ZP4	-	nonsynonymous SNV	ZP4:NM_021186:exon1:c.13C>T:p.R5W	3.213e-05	5.449e-05	3.715e-05	2.623e-05	3.976e-05	0	0	2.918e-05	5.449e-05	4.45e-05	0	0	0.0002	5.45e-05	7.472e-05	5.662e-05	0.0001	-	-	-	-	-	-	-	-	-	-	-	-	-	-	-	-	-	large_intestine	3
12	130851689	130851689	C	T	exonic	PIWIL1	-	nonsynonymous SNV	PIWIL1:NM_001190971:exon19:c.2207C>T:p.T736M,PIWIL1:NM_004764:exon19:c.2207C>T:p.T736M	4.377e-05	8.798e-05	3.681e-05	5.195e-05	4.374e-05	0	0	2.893e-05	0	8.798e-05	0	0	0	8.963e-05	0.0001	8.768e-05	7.016e-05	3.186e-05	6.483e-05	5.723e-05	0	3.183e-05	0	.	0	0	6.483e-05	0	0	0	.	7.345e-05	.	.	large_intestine	3
17	59485586	59485586	C	T	exonic	TBX2	-	nonsynonymous SNV	TBX2:NM_005994:exon7:c.1858C>T:p.R620C	8.072e-06	1.809e-05	1.486e-05	0	7.957e-06	0	0	0	0	1.809e-05	0	0	0	1.841e-05	2.309e-05	1.994e-05	2.339e-05	-	-	-	-	-	-	-	-	-	-	-	-	-	-	-	-	-	large_intestine	3
19	34710328	34710328	C	T	exonic	LSM14A	-	nonsynonymous SNV	LSM14A:NM_001114093:exon7:c.814C>T:p.R272C,LSM14A:NM_015578:exon7:c.814C>T:p.R272C	-	-	-	-	-	-	-	-	-	-	-	-	-	-	-	-	-	-	-	-	-	-	-	-	-	-	-	-	-	-	-	-	-	-	large_intestine	3
2	177016482	177016482	G	A	exonic	HOXD4	-	nonsynonymous SNV	HOXD4:NM_014621:exon1:c.121G>A:p.A41T	-	-	-	-	-	-	-	-	-	-	-	-	-	-	-	-	-	-	-	-	-	-	-	-	-	-	-	-	-	-	-	-	-	-	large_intestine	2
2	177016482	177016482	G	T	exonic	HOXD4	-	nonsynonymous SNV	HOXD4:NM_014621:exon1:c.121G>T:p.A41S	-	-	-	-	-	-	-	-	-	-	-	-	-	-	-	-	-	-	-	-	-	-	-	-	-	-	-	-	-	-	-	-	-	-	large_intestine	1
10	114912188	114912188	C	T	exonic	TCF7L2	-	nonsynonymous SNV	TCF7L2:NM_001349870:exon7:c.829C>T:p.R277W,TCF7L2:NM_001349871:exon7:c.709C>T:p.R237W,TCF7L2:NM_001198530:exon9:c.1087C>T:p.R363W,TCF7L2:NM_001146284:exon10:c.1177C>T:p.R393W,TCF7L2:NM_001146285:exon10:c.1189C>T:p.R397W,TCF7L2:NM_001146286:exon10:c.1189C>T:p.R397W,TCF7L2:NM_001198525:exon10:c.1204C>T:p.R402W,TCF7L2:NM_001198526:exon10:c.1189C>T:p.R397W,TCF7L2:NM_001198527:exon10:c.1177C>T:p.R393W…	-	-	-	-	-	-	-	-	-	-	-	-	-	-	-	-	-	-	-	-	-	-	-	-	-	-	-	-	-	-	-	-	-	-	large_intestine	3
3	178936092	178936092	A	C	exonic	PIK3CA	-	nonsynonymous SNV	PIK3CA:NM_006218:exon10:c.1634A>C:p.E545A	0	.	0	0	1.201e-05	0	0	0	0	0	0	0	0	.	.	.	.	-	-	-	-	-	-	-	-	-	-	-	-	-	-	-	-	-	large_intestine	2
3	178936092	178936092	A	G	exonic	PIK3CA	-	nonsynonymous SNV	PIK3CA:NM_006218:exon10:c.1634A>G:p.E545G	0	.	0	0	8.007e-06	0	0	0	0	0	0	0	0	.	.	.	.	-	-	-	-	-	-	-	-	-	-	-	-	-	-	-	-	-	large_intestine	1
22	47507446	47507446	G	A	exonic	TBC1D22A	-	nonsynonymous SNV	TBC1D22A:NM_001284303:exon10:c.1138G>A:p.A380T,TBC1D22A:NM_001284305:exon12:c.1231G>A:p.A411T,TBC1D22A:NM_014346:exon12:c.1372G>A:p.A458T,TBC1D22A:NM_001284304:exon13:c.1282G>A:p.A428T	-	-	-	-	-	-	-	-	-	-	-	-	-	-	-	-	-	-	-	-	-	-	-	-	-	-	-	-	-	-	-	-	-	-	large_intestine	3
11	134121181	134121181	C	T	exonic	THYN1	-	nonsynonymous SNV	THYN1:NM_014174:exon2:c.65G>A:p.R22H,THYN1:NM_001037304:exon3:c.65G>A:p.R22H,THYN1:NM_001037305:exon3:c.65G>A:p.R22H,THYN1:NM_199297:exon3:c.65G>A:p.R22H,THYN1:NM_199298:exon3:c.65G>A:p.R22H	1.608e-05	0.0001	1.487e-05	1.751e-05	1.591e-05	0	3.318e-05	0	0.0001	8.864e-06	0	0	0	0.0001	7.51e-05	5.713e-05	6.486e-05	-	-	-	-	-	-	-	-	-	-	-	-	-	-	-	-	-	large_intestine	3
5	118968553	118968553	G	A	exonic	FAM170A	-	nonsynonymous SNV	FAM170A:NM_001367956:exon2:c.181G>A:p.V61I,FAM170A:NM_182761:exon2:c.181G>A:p.V61I	1.61e-05	3.298e-05	2.227e-05	8.795e-06	1.993e-05	0	3.298e-05	0	0	2.659e-05	0	0	0	3.298e-05	3.381e-05	3.308e-05	6.431e-05	9.552e-05	0.0001	0.0002	0	9.549e-05	0.0001	.	0	0	0.0001	0	0	0	0.0001	0.0001	.	.	large_intestine	3
17	7578413	7578413	C	A	exonic	TP53	-	nonsynonymous SNV	TP53:NM_001126115:exon1:c.121G>T:p.V41L,TP53:NM_001126116:exon1:c.121G>T:p.V41L,TP53:NM_001126117:exon1:c.121G>T:p.V41L,TP53:NM_001276697:exon1:c.40G>T:p.V14L,TP53:NM_001276698:exon1:c.40G>T:p.V14L,TP53:NM_001276699:exon1:c.40G>T:p.V14L,TP53:NM_001126118:exon4:c.400G>T:p.V134L,TP53:NM_000546:exon5:c.517G>T:p.V173L,TP53:NM_001126112:exon5:c.517G>T:p.V173L,TP53:NM_001126113:exon5:c.517G>T:p.V173L,T…	-	-	-	-	-	-	-	-	-	-	-	-	-	-	-	-	-	-	-	-	-	-	-	-	-	-	-	-	-	-	-	-	-	-	large_intestine	2
17	7578413	7578413	C	T	exonic	TP53	-	nonsynonymous SNV	TP53:NM_001126115:exon1:c.121G>A:p.V41M,TP53:NM_001126116:exon1:c.121G>A:p.V41M,TP53:NM_001126117:exon1:c.121G>A:p.V41M,TP53:NM_001276697:exon1:c.40G>A:p.V14M,TP53:NM_001276698:exon1:c.40G>A:p.V14M,TP53:NM_001276699:exon1:c.40G>A:p.V14M,TP53:NM_001126118:exon4:c.400G>A:p.V134M,TP53:NM_000546:exon5:c.517G>A:p.V173M,TP53:NM_001126112:exon5:c.517G>A:p.V173M,TP53:NM_001126113:exon5:c.517G>A:p.V173M,T…	-	-	-	-	-	-	-	-	-	-	-	-	-	-	-	-	-	-	-	-	-	-	-	-	-	-	-	-	-	-	-	-	-	-	large_intestine	1
5	52214576	52214576	C	T	exonic	ITGA1	-	nonsynonymous SNV	ITGA1:NM_181501:exon16:c.2003C>T:p.A668V	4.083e-06	8.956e-06	0	8.877e-06	1.193e-05	0	0	0	0	8.956e-06	0	0	0	9.125e-06	1.136e-05	9.935e-06	2.359e-05	-	-	-	-	-	-	-	-	-	-	-	-	-	-	-	-	-	large_intestine	3
9	19619585	19619585	C	T	exonic	SLC24A2	-	nonsynonymous SNV	SLC24A2:NM_001193288:exon3:c.1075G>A:p.E359K,SLC24A2:NM_020344:exon3:c.1075G>A:p.E359K	1.593e-05	6.533e-05	7.373e-06	2.6e-05	1.591e-05	0	6.533e-05	0	0	8.822e-06	4.619e-05	0	0	6.533e-05	6.534e-05	6.552e-05	6.373e-05	3.185e-05	6.481e-05	5.723e-05	0	3.183e-05	0	.	0	0	6.481e-05	0	0	0	.	7.341e-05	.	.	large_intestine	3
6	146240543	146240543	G	A	exonic	SHPRH	-	nonsynonymous SNV	SHPRH:NM_001042683:exon22:c.4093C>T:p.R1365C,SHPRH:NM_001370327:exon22:c.4093C>T:p.R1365C,SHPRH:NM_173082:exon22:c.4105C>T:p.R1369C,SHPRH:NM_001370328:exon24:c.2650C>T:p.R884C	4.015e-06	2.901e-05	0	8.775e-06	7.991e-06	0	0	2.901e-05	0	0	0	0	0	2.913e-05	3.289e-05	2.929e-05	.	-	-	-	-	-	-	-	-	-	-	-	-	-	-	-	-	-	large_intestine	3
17	7578526	7578526	C	T	exonic	TP53	-	nonsynonymous SNV	TP53:NM_001126115:exon1:c.8G>A:p.C3Y,TP53:NM_001126116:exon1:c.8G>A:p.C3Y,TP53:NM_001126117:exon1:c.8G>A:p.C3Y,TP53:NM_001126118:exon4:c.287G>A:p.C96Y,TP53:NM_000546:exon5:c.404G>A:p.C135Y,TP53:NM_001126112:exon5:c.404G>A:p.C135Y,TP53:NM_001126113:exon5:c.404G>A:p.C135Y,TP53:NM_001126114:exon5:c.404G>A:p.C135Y,TP53:NM_001276695:exon5:c.287G>A:p.C96Y,TP53:NM_001276696:exon5:c.287G>A:p.C96Y,TP53:NM…	0	.	0	0	3.976e-06	0	0	0	0	0	0	0	0	.	.	.	.	-	-	-	-	-	-	-	-	-	-	-	-	-	-	-	-	-	large_intestine	2
17	7578526	7578526	C	G	exonic	TP53	-	nonsynonymous SNV	TP53:NM_001126115:exon1:c.8G>C:p.C3S,TP53:NM_001126116:exon1:c.8G>C:p.C3S,TP53:NM_001126117:exon1:c.8G>C:p.C3S,TP53:NM_001126118:exon4:c.287G>C:p.C96S,TP53:NM_000546:exon5:c.404G>C:p.C135S,TP53:NM_001126112:exon5:c.404G>C:p.C135S,TP53:NM_001126113:exon5:c.404G>C:p.C135S,TP53:NM_001126114:exon5:c.404G>C:p.C135S,TP53:NM_001276695:exon5:c.287G>C:p.C96S,TP53:NM_001276696:exon5:c.287G>C:p.C96S,TP53:NM…	-	-	-	-	-	-	-	-	-	-	-	-	-	-	-	-	-	-	-	-	-	-	-	-	-	-	-	-	-	-	-	-	-	-	large_intestine	1
15	54919114	54919114	G	A	exonic	UNC13C	-	nonsynonymous SNV	UNC13C:NM_001080534:exon31:c.6448G>A:p.G2150R,UNC13C:NM_001329919:exon32:c.6442G>A:p.G2148R	8.066e-06	6.462e-05	7.437e-06	8.81e-06	1.202e-05	6.462e-05	0	0	0	8.924e-06	0	0	0	8.815e-05	6.478e-05	7.079e-05	2.353e-05	-	-	-	-	-	-	-	-	-	-	-	-	-	-	-	-	-	large_intestine	3
1	154304153	154304153	C	T	exonic	ATP8B2	-	nonsynonymous SNV	ATP8B2:NM_001367934:exon6:c.494C>T:p.A165V,ATP8B2:NM_001005855:exon7:c.437C>T:p.A146V,ATP8B2:NM_001370596:exon7:c.437C>T:p.A146V,ATP8B2:NM_001370597:exon7:c.437C>T:p.A146V,ATP8B2:NM_001372009:exon7:c.437C>T:p.A146V	1.193e-05	6.533e-05	7.357e-06	1.731e-05	1.193e-05	0	6.533e-05	0	0	8.79e-06	0	0	0	6.533e-05	6.534e-05	6.552e-05	6.373e-05	3.186e-05	6.481e-05	5.722e-05	0	3.183e-05	0	.	0	0	6.481e-05	0	0	0	9.019e-05	.	.	.	large_intestine	3
19	16918475	16918475	C	T	exonic	NWD1	-	nonsynonymous SNV	NWD1:NM_001347994:exon17:c.3197C>T:p.T1066M,NWD1:NM_001007525:exon18:c.3815C>T:p.T1272M,NWD1:NM_001290355:exon19:c.3410C>T:p.T1137M	2.878e-05	5.552e-05	3.04e-05	2.686e-05	7.555e-05	0	3.405e-05	0	5.552e-05	4.534e-05	0	0	0	5.554e-05	7.463e-05	5.776e-05	0.0001	-	-	-	-	-	-	-	-	-	-	-	-	-	-	-	-	-	large_intestine	3
6	84234218	84234218	G	A	exonic	PRSS35	-	nonsynonymous SNV	PRSS35:NM_153362:exon2:c.1058G>A:p.R353H,PRSS35:NM_001170423:exon3:c.1058G>A:p.R353H	0	.	0	0	3.976e-06	0	0	0	0	0	0	0	0	.	.	.	.	-	-	-	-	-	-	-	-	-	-	-	-	-	-	-	-	-	large_intestine	3
2	27277614	27277614	G	A	exonic	AGBL5	-	nonsynonymous SNV	AGBL5:NM_001035507:exon5:c.668G>A:p.R223H,AGBL5:NM_021831:exon5:c.668G>A:p.R223H	-	-	-	-	-	-	-	-	-	-	-	-	-	-	-	-	-	-	-	-	-	-	-	-	-	-	-	-	-	-	-	-	-	-	large_intestine	3
6	152470650	152470650	G	A	exonic	SYNE1	-	nonsynonymous SNV	SYNE1:NM_001347702:exon7:c.1069C>T:p.R357C,SYNE1:NM_001347701:exon9:c.1210C>T:p.R404C,SYNE1:NM_033071:exon135:c.24391C>T:p.R8131C,SYNE1:NM_182961:exon136:c.24604C>T:p.R8202C	3.977e-06	8.792e-06	0	8.655e-06	3.976e-06	0	0	0	0	8.792e-06	0	0	0	8.957e-06	1.117e-05	9.735e-06	.	3.186e-05	0.0001	5.723e-05	0	3.183e-05	0.0001	.	0	0	0	0	0	0	0.0001	0.0003	.	0.0004	large_intestine	3
19	44097409	44097409	C	T	exonic	IRGQ	-	nonsynonymous SNV	IRGQ:NM_001007561:exon3:c.641G>A:p.R214H	-	-	-	-	-	-	-	-	-	-	-	-	-	-	-	-	-	-	-	-	-	-	-	-	-	-	-	-	-	-	-	-	-	-	large_intestine	3
12	25398282	25398282	C	A	exonic	KRAS	-	nonsynonymous SNV	KRAS:NM_001369786:exon2:c.37G>T:p.G13C,KRAS:NM_001369787:exon2:c.37G>T:p.G13C,KRAS:NM_004985:exon2:c.37G>T:p.G13C,KRAS:NM_033360:exon2:c.37G>T:p.G13C	0	.	0	0	7.953e-06	0	0	0	0	0	0	0	0	.	.	.	.	-	-	-	-	-	-	-	-	-	-	-	-	-	-	-	-	-	large_intestine	3
8	52258474	52258474	G	A	exonic	PXDNL	-	nonsynonymous SNV	PXDNL:NM_144651:exon20:c.3935C>T:p.T1312M	4.016e-06	8.864e-06	7.404e-06	0	8.001e-06	0	0	0	0	8.864e-06	0	0	0	9.031e-06	1.125e-05	9.815e-06	2.353e-05	3.185e-05	6.483e-05	0	7.183e-05	3.183e-05	0	.	0	0	6.483e-05	0	0	0	9.022e-05	.	.	.	large_intestine	3
12	29757205	29757205	C	T	exonic	TMTC1	-	nonsynonymous SNV	TMTC1:NM_001193451:exon7:c.1156G>A:p.G386S,TMTC1:NM_175861:exon7:c.832G>A:p.G278S,TMTC1:NM_001367875:exon9:c.1342G>A:p.G448S	7.962e-06	0.0001	7.367e-06	8.661e-06	7.952e-06	0	0	0	0.0001	0	0	0	0	0.0001	0.0001	0.0001	0.0001	6.369e-05	0.0006	5.724e-05	7.178e-05	6.366e-05	0.0001	.	0	0.0006	0	0	0	0	0.0007	0.0006	.	0.0011	large_intestine	3
13	46716466	46716466	C	T	exonic	LCP1	-	nonsynonymous SNV	LCP1:NM_002298:exon13:c.1463G>A:p.R488H	3.181e-05	0.0002	5.15e-05	8.653e-06	3.181e-05	6.152e-05	0.0002	0	0	1.758e-05	0	0	0	0.0002	0.0002	0.0002	0.0001	-	-	-	-	-	-	-	-	-	-	-	-	-	-	-	-	-	large_intestine	3
17	1563231	1563231	C	T	exonic	PRPF8	-	nonsynonymous SNV	PRPF8:NM_006445:exon31:c.4850G>A:p.R1617Q	0	.	0	0	3.976e-06	0	0	0	0	0	0	0	0	.	.	.	.	-	-	-	-	-	-	-	-	-	-	-	-	-	-	-	-	-	large_intestine	3
19	11132437	11132437	C	T	exonic	SMARCA4	-	nonsynonymous SNV	SMARCA4:NM_001128845:exon18:c.2653C>T:p.R885C,SMARCA4:NM_001128846:exon18:c.2653C>T:p.R885C,SMARCA4:NM_001128848:exon18:c.2653C>T:p.R885C,SMARCA4:NM_001128847:exon19:c.2653C>T:p.R885C,SMARCA4:NM_001128849:exon19:c.2653C>T:p.R885C,SMARCA4:NM_003072:exon19:c.2653C>T:p.R885C,SMARCA4:NM_001128844:exon20:c.2653C>T:p.R885C	-	-	-	-	-	-	-	-	-	-	-	-	-	-	-	-	-	-	-	-	-	-	-	-	-	-	-	-	-	-	-	-	-	-	large_intestine	3
2	238289624	238289624	C	T	exonic	COL6A3	-	nonsynonymous SNV	COL6A3:NM_057164:exon3:c.610G>A:p.A204T,COL6A3:NM_057166:exon3:c.610G>A:p.A204T,COL6A3:NM_057165:exon4:c.1213G>A:p.A405T,COL6A3:NM_057167:exon4:c.1213G>A:p.A405T,COL6A3:NM_004369:exon5:c.1831G>A:p.A611T	1.194e-05	6.154e-05	2.209e-05	0	1.193e-05	6.154e-05	0	0	0	8.803e-06	0	0	0.0002	8.319e-05	6.168e-05	6.711e-05	0.0001	3.186e-05	6.488e-05	5.721e-05	0	3.183e-05	0	.	0	0	6.488e-05	0	0	0	9.03e-05	.	.	.	large_intestine	3
6	166571895	166571895	C	T	exonic	TBXT	-	nonsynonymous SNV	TBXT:NM_001270484:exon8:c.1042G>A:p.A348T,TBXT:NM_001366285:exon8:c.1219G>A:p.A407T,TBXT:NM_001366286:exon9:c.1219G>A:p.A407T,TBXT:NM_003181:exon9:c.1216G>A:p.A406T	3.979e-06	8.798e-06	7.359e-06	0	3.976e-06	0	0	0	0	8.798e-06	0	0	0	8.961e-06	1.118e-05	9.739e-06	2.339e-05	-	-	-	-	-	-	-	-	-	-	-	-	-	-	-	-	-	large_intestine	3
18	45374881	45374881	C	T	exonic	SMAD2	-	nonsynonymous SNV	SMAD2:NM_001135937:exon7:c.872G>A:p.R291Q,SMAD2:NM_001003652:exon8:c.962G>A:p.R321Q,SMAD2:NM_005901:exon8:c.962G>A:p.R321Q	-	-	-	-	-	-	-	-	-	-	-	-	-	-	-	-	-	-	-	-	-	-	-	-	-	-	-	-	-	-	-	-	-	-	large_intestine	3
4	107845202	107845202	C	T	exonic	DKK2	-	nonsynonymous SNV	DKK2:NM_014421:exon4:c.689G>A:p.R230H	-	-	-	-	-	-	-	-	-	-	-	-	-	-	-	-	-	-	-	-	-	-	-	-	-	-	-	-	-	-	-	-	-	-	large_intestine	3
17	7578457	7578457	C	T	exonic	TP53	-	nonsynonymous SNV	TP53:NM_001126115:exon1:c.77G>A:p.R26H,TP53:NM_001126116:exon1:c.77G>A:p.R26H,TP53:NM_001126117:exon1:c.77G>A:p.R26H,TP53:NM_001126118:exon4:c.356G>A:p.R119H,TP53:NM_000546:exon5:c.473G>A:p.R158H,TP53:NM_001126112:exon5:c.473G>A:p.R158H,TP53:NM_001126113:exon5:c.473G>A:p.R158H,TP53:NM_001126114:exon5:c.473G>A:p.R158H,TP53:NM_001276695:exon5:c.356G>A:p.R119H,TP53:NM_001276696:exon5:c.356G>A:p.R119…	3.98e-06	.	7.361e-06	0	3.976e-06	0	0	0	0	0	0	9.93e-05	0	.	.	.	.	-	-	-	-	-	-	-	-	-	-	-	-	-	-	-	-	-	large_intestine	3
1	109366208	109366208	C	T	exonic	AKNAD1	-	nonsynonymous SNV	AKNAD1:NM_152763:exon12:c.2039G>A:p.C680Y	-	-	-	-	-	-	-	-	-	-	-	-	-	-	-	-	-	-	-	-	-	-	-	-	-	-	-	-	-	-	-	-	-	-	large_intestine	2
1	109366208	109366208	C	A	exonic	AKNAD1	-	nonsynonymous SNV	AKNAD1:NM_152763:exon12:c.2039G>T:p.C680F	7.953e-06	2.891e-05	0	1.731e-05	7.952e-06	0	0	2.891e-05	0	0	4.62e-05	0	0	2.902e-05	3.276e-05	2.919e-05	5.845e-05	-	-	-	-	-	-	-	-	-	-	-	-	-	-	-	-	-	large_intestine	1
2	102988513	102988513	T	A	exonic	IL18R1	-	nonsynonymous SNV	IL18R1:NM_001371418:exon4:c.403T>A:p.F135I,IL18R1:NM_001371419:exon4:c.403T>A:p.F135I,IL18R1:NM_001371420:exon4:c.403T>A:p.F135I,IL18R1:NM_003855:exon4:c.403T>A:p.F135I	-	-	-	-	-	-	-	-	-	-	-	-	-	-	-	-	-	-	-	-	-	-	-	-	-	-	-	-	-	-	-	-	-	-	large_intestine	3
2	238296564	238296564	C	T	exonic	COL6A3	-	nonsynonymous SNV	COL6A3:NM_057165:exon3:c.355G>A:p.A119T,COL6A3:NM_057167:exon3:c.355G>A:p.A119T,COL6A3:NM_004369:exon4:c.973G>A:p.A325T	-	-	-	-	-	-	-	-	-	-	-	-	-	-	-	-	-	-	-	-	-	-	-	-	-	-	-	-	-	-	-	-	-	-	large_intestine	3
16	3486729	3486729	G	A	exonic	ZNF597	-	nonsynonymous SNV	ZNF597:NM_152457:exon4:c.970C>T:p.R324C	2.387e-05	0.0001	2.208e-05	2.598e-05	2.386e-05	0	0	5.783e-05	0.0001	1.759e-05	0	0	0	0.0001	0.0001	0.0001	0.0001	-	-	-	-	-	-	-	-	-	-	-	-	-	-	-	-	-	large_intestine	3
12	6701583	6701583	C	T	exonic	CHD4	-	nonsynonymous SNV	CHD4:NM_001297553:exon18:c.2903G>A:p.R968H,CHD4:NM_001273:exon19:c.2924G>A:p.R975H,CHD4:NM_001363606:exon19:c.2885G>A:p.R962H	-	-	-	-	-	-	-	-	-	-	-	-	-	-	-	-	-	-	-	-	-	-	-	-	-	-	-	-	-	-	-	-	-	-	large_intestine	3
2	1507809	1507809	G	A	exonic	TPO	-	nonsynonymous SNV	TPO:NM_175722:exon12:c.1957G>A:p.A653T,TPO:NM_001206745:exon13:c.2305G>A:p.A769T,TPO:NM_175719:exon13:c.2305G>A:p.A769T,TPO:NM_000547:exon14:c.2476G>A:p.A826T,TPO:NM_001206744:exon14:c.2476G>A:p.A826T	1.591e-05	6.533e-05	2.208e-05	8.655e-06	1.59e-05	0	6.533e-05	0	0	1.758e-05	0	0	0	6.533e-05	6.534e-05	6.552e-05	.	-	-	-	-	-	-	-	-	-	-	-	-	-	-	-	-	-	large_intestine	3
16	3293377	3293377	C	T	exonic	MEFV	-	nonsynonymous SNV	MEFV:NM_000243:exon10:c.2110G>A:p.V704I	3.181e-05	7.032e-05	2.943e-05	3.461e-05	3.181e-05	0	0	0	0	7.032e-05	0	0	0	7.163e-05	6.7e-05	7.786e-05	9.353e-05	-	-	-	-	-	-	-	-	-	-	-	-	-	-	-	-	-	large_intestine	3
3	9776020	9776020	C	T	exonic	BRPF1	-	nonsynonymous SNV	BRPF1:NM_001003694:exon2:c.196C>T:p.R66C,BRPF1:NM_001319049:exon2:c.196C>T:p.R66C,BRPF1:NM_001319050:exon2:c.196C>T:p.R66C,BRPF1:NM_004634:exon2:c.196C>T:p.R66C	3.984e-06	8.814e-06	7.366e-06	0	3.976e-06	0	0	0	0	8.814e-06	0	0	0	8.979e-06	1.119e-05	9.748e-06	.	-	-	-	-	-	-	-	-	-	-	-	-	-	-	-	-	-	large_intestine	3
3	38945502	38945502	C	T	exonic	SCN11A	-	nonsynonymous SNV	SCN11A:NM_014139:exon12:c.1696G>A:p.V566I,SCN11A:NM_001349253:exon16:c.1696G>A:p.V566I	1.2e-05	5.463e-05	1.482e-05	8.701e-06	1.193e-05	0	0	0	5.463e-05	1.767e-05	0	0	0	5.464e-05	7.478e-05	5.681e-05	4.686e-05	3.186e-05	0.0001	0	7.184e-05	3.183e-05	0.0001	.	0	0	0	0	0	0	0.0001	.	.	.	large_intestine	3
3	178921549	178921549	T	G	exonic	PIK3CA	-	nonsynonymous SNV	PIK3CA:NM_006218:exon5:c.1031T>G:p.V344G	-	-	-	-	-	-	-	-	-	-	-	-	-	-	-	-	-	-	-	-	-	-	-	-	-	-	-	-	-	-	-	-	-	-	large_intestine	3
17	7578235	7578235	T	C	exonic	TP53	-	nonsynonymous SNV	TP53:NM_001126115:exon2:c.218A>G:p.Y73C,TP53:NM_001126116:exon2:c.218A>G:p.Y73C,TP53:NM_001126117:exon2:c.218A>G:p.Y73C,TP53:NM_001276697:exon2:c.137A>G:p.Y46C,TP53:NM_001276698:exon2:c.137A>G:p.Y46C,TP53:NM_001276699:exon2:c.137A>G:p.Y46C,TP53:NM_001126118:exon5:c.497A>G:p.Y166C,TP53:NM_000546:exon6:c.614A>G:p.Y205C,TP53:NM_001126112:exon6:c.614A>G:p.Y205C,TP53:NM_001126113:exon6:c.614A>G:p.Y205…	-	-	-	-	-	-	-	-	-	-	-	-	-	-	-	-	-	-	-	-	-	-	-	-	-	-	-	-	-	-	-	-	-	-	large_intestine	2
17	7578235	7578235	T	G	exonic	TP53	-	nonsynonymous SNV	TP53:NM_001126115:exon2:c.218A>C:p.Y73S,TP53:NM_001126116:exon2:c.218A>C:p.Y73S,TP53:NM_001126117:exon2:c.218A>C:p.Y73S,TP53:NM_001276697:exon2:c.137A>C:p.Y46S,TP53:NM_001276698:exon2:c.137A>C:p.Y46S,TP53:NM_001276699:exon2:c.137A>C:p.Y46S,TP53:NM_001126118:exon5:c.497A>C:p.Y166S,TP53:NM_000546:exon6:c.614A>C:p.Y205S,TP53:NM_001126112:exon6:c.614A>C:p.Y205S,TP53:NM_001126113:exon6:c.614A>C:p.Y205…	-	-	-	-	-	-	-	-	-	-	-	-	-	-	-	-	-	-	-	-	-	-	-	-	-	-	-	-	-	-	-	-	-	-	large_intestine	1
7	92760745	92760745	T	C	exonic	SAMD9L	-	nonsynonymous SNV	SAMD9L:NM_001303500:exon4:c.4540A>G:p.K1514E,SAMD9L:NM_001350083:exon4:c.4540A>G:p.K1514E,SAMD9L:NM_001303496:exon5:c.4540A>G:p.K1514E,SAMD9L:NM_001303498:exon5:c.4540A>G:p.K1514E,SAMD9L:NM_001350085:exon5:c.4540A>G:p.K1514E,SAMD9L:NM_152703:exon5:c.4540A>G:p.K1514E,SAMD9L:NM_001303497:exon6:c.4540A>G:p.K1514E,SAMD9L:NM_001350082:exon6:c.4540A>G:p.K1514E,SAMD9L:NM_001350084:exon6:c.4540A>G:p.K151…	3.994e-05	7.962e-05	3.695e-05	4.344e-05	4.374e-05	0	0	2.905e-05	0	7.962e-05	0	0	0	7.21e-05	6.709e-05	7.841e-05	5.862e-05	3.185e-05	0.0012	0	7.179e-05	3.183e-05	0	.	0.0012	0	0	0	0	0	0.0012	0.0018	.	0.0041	large_intestine	3
15	65793045	65793045	C	T	exonic	DPP8	-	nonsynonymous SNV	DPP8:NM_001320876:exon4:c.445G>A:p.G149R,DPP8:NM_017743:exon4:c.445G>A:p.G149R,DPP8:NM_130434:exon4:c.445G>A:p.G149R,DPP8:NM_001320875:exon5:c.493G>A:p.G165R,DPP8:NM_197960:exon5:c.493G>A:p.G165R,DPP8:NM_197961:exon5:c.493G>A:p.G165R	3.977e-06	8.791e-06	0	8.653e-06	3.976e-06	0	0	0	0	8.791e-06	0	0	0	8.956e-06	1.117e-05	9.734e-06	.	-	-	-	-	-	-	-	-	-	-	-	-	-	-	-	-	-	large_intestine	3
7	4153028	4153028	C	T	exonic	SDK1	-	nonsynonymous SNV	SDK1:NM_152744:exon24:c.3542C>T:p.T1181M	3.983e-06	3.266e-05	0	8.669e-06	7.952e-06	0	3.266e-05	0	0	0	0	0	0	3.266e-05	3.267e-05	3.276e-05	6.374e-05	-	-	-	-	-	-	-	-	-	-	-	-	-	-	-	-	-	large_intestine	3
15	25959028	25959028	C	T	exonic	ATP10A	-	nonsynonymous SNV	ATP10A:NM_024490:exon10:c.2137G>A:p.V713M	-	-	-	-	-	-	-	-	-	-	-	-	-	-	-	-	-	-	-	-	-	-	-	-	-	-	-	-	-	-	-	-	-	-	large_intestine	3
21	34134464	34134464	G	A	exonic	PAXBP1	-	nonsynonymous SNV	PAXBP1:NM_013329:exon4:c.814C>T:p.R272W,PAXBP1:NM_016631:exon4:c.814C>T:p.R272W	-	-	-	-	-	-	-	-	-	-	-	-	-	-	-	-	-	-	-	-	-	-	-	-	-	-	-	-	-	-	-	-	-	-	large_intestine	3
3	178952074	178952074	G	A	exonic	PIK3CA	-	nonsynonymous SNV	PIK3CA:NM_006218:exon21:c.3129G>A:p.M1043I	-	-	-	-	-	-	-	-	-	-	-	-	-	-	-	-	-	-	-	-	-	-	-	-	-	-	-	-	-	-	-	-	-	-	large_intestine	2
3	178952074	178952074	G	T	exonic	PIK3CA	-	nonsynonymous SNV	PIK3CA:NM_006218:exon21:c.3129G>T:p.M1043I	-	-	-	-	-	-	-	-	-	-	-	-	-	-	-	-	-	-	-	-	-	-	-	-	-	-	-	-	-	-	-	-	-	-	large_intestine	1
5	41149516	41149516	T	G	exonic	C6	-	nonsynonymous SNV	C6:NM_000065:exon17:c.2450A>C:p.K817T,C6:NM_001115131:exon17:c.2450A>C:p.K817T	-	-	-	-	-	-	-	-	-	-	-	-	-	-	-	-	-	-	-	-	-	-	-	-	-	-	-	-	-	-	-	-	-	-	large_intestine	2
5	41149516	41149516	T	C	exonic	C6	-	nonsynonymous SNV	C6:NM_000065:exon17:c.2450A>G:p.K817R,C6:NM_001115131:exon17:c.2450A>G:p.K817R	-	-	-	-	-	-	-	-	-	-	-	-	-	-	-	-	-	-	-	-	-	-	-	-	-	-	-	-	-	-	-	-	-	-	large_intestine	1
6	32944477	32944477	C	T	exonic	BRD2	-	nonsynonymous SNV	BRD2:NM_001199455:exon6:c.964C>T:p.R322C,BRD2:NM_001199456:exon6:c.823C>T:p.R275C,BRD2:NM_001113182:exon7:c.964C>T:p.R322C,BRD2:NM_005104:exon7:c.964C>T:p.R322C,BRD2:NM_001291986:exon8:c.604C>T:p.R202C	-	-	-	-	-	-	-	-	-	-	-	-	-	-	-	-	-	-	-	-	-	-	-	-	-	-	-	-	-	-	-	-	-	-	large_intestine	3
2	152408253	152408253	G	A	exonic	NEB	-	nonsynonymous SNV	NEB:NM_004543:exon102:c.14840C>T:p.S4947L,NEB:NM_001164507:exon129:c.19943C>T:p.S6648L,NEB:NM_001164508:exon129:c.19943C>T:p.S6648L,NEB:NM_001271208:exon129:c.19943C>T:p.S6648L	1.612e-05	3.277e-05	2.971e-05	0	1.6e-05	0	3.277e-05	0	0	2.667e-05	0	0	0	3.277e-05	3.378e-05	3.287e-05	6.397e-05	-	-	-	-	-	-	-	-	-	-	-	-	-	-	-	-	-	large_intestine	3
3	62464048	62464048	C	T	exonic	CADPS	-	nonsynonymous SNV	CADPS:NM_183393:exon20:c.2980G>A:p.A994T,CADPS:NM_183394:exon21:c.3100G>A:p.A1034T,CADPS:NM_003716:exon23:c.3217G>A:p.A1073T	2.792e-05	0.0001	2.214e-05	3.471e-05	2.784e-05	0.0001	0	0	0	4.418e-05	0	0	0	8.317e-05	0.0001	0.0001	0.0001	3.185e-05	0.0012	0	7.182e-05	3.183e-05	0	.	0.0012	0	0	0	0	0	0.0012	0.0018	.	.	large_intestine	3
8	88885187	88885187	G	A	exonic	DCAF4L2	-	nonsynonymous SNV	DCAF4L2:NM_152418:exon1:c.1013C>T:p.T338M	-	-	-	-	-	-	-	-	-	-	-	-	-	-	-	-	-	-	-	-	-	-	-	-	-	-	-	-	-	-	-	-	-	-	large_intestine	3
14	65271701	65271701	G	A	exonic	SPTB	-	nonsynonymous SNV	SPTB:NM_001024858:exon2:c.256C>T:p.R86C,SPTB:NM_001355436:exon3:c.256C>T:p.R86C,SPTB:NM_001355437:exon3:c.256C>T:p.R86C	-	-	-	-	-	-	-	-	-	-	-	-	-	-	-	-	-	3.187e-05	0.0001	0	7.182e-05	3.183e-05	0.0001	.	0	0	0	0	0	0	0.0001	0.0003	.	0.0004	large_intestine	3
22	19839750	19839750	C	T	exonic	RTL10	-	nonsynonymous SNV	RTL10:NM_024627:exon3:c.35G>A:p.R12H	6.472e-05	6.302e-05	4.47e-05	8.851e-05	6.76e-05	0	0	2.905e-05	0	6.302e-05	0.0004	0	0	6.407e-05	6.844e-05	6.936e-05	9.405e-05	0.0001	0.0002	0.0001	0.0001	0.0001	0	.	0	0	0.0002	0.0003	0	0	0.0002	0.0002	.	0.0002	large_intestine	3
5	160753376	160753376	G	A	exonic	GABRB2	-	nonsynonymous SNV	GABRB2:NM_001371727:exon9:c.1190C>T:p.T397M,GABRB2:NM_021911:exon10:c.1190C>T:p.T397M	6.842e-05	0.0001	5.203e-05	8.778e-05	6.824e-05	0.0001	0	5.809e-05	0	0.0001	0	0	0	0.0002	0.0001	0.0001	0.0001	-	-	-	-	-	-	-	-	-	-	-	-	-	-	-	-	-	large_intestine	3
6	161574408	161574408	C	T	exonic	AGPAT4	-	nonsynonymous SNV	AGPAT4:NM_020133:exon5:c.634G>A:p.A212T	4.117e-06	2.951e-05	0	8.959e-06	2.783e-05	0	0	2.951e-05	0	0	0	0	0	2.961e-05	3.352e-05	2.978e-05	.	-	-	-	-	-	-	-	-	-	-	-	-	-	-	-	-	-	large_intestine	3
17	7574018	7574018	G	A	exonic	TP53	-	nonsynonymous SNV	TP53:NM_001126115:exon6:c.613C>T:p.R205C,TP53:NM_001276697:exon6:c.532C>T:p.R178C,TP53:NM_001126118:exon9:c.892C>T:p.R298C,TP53:NM_000546:exon10:c.1009C>T:p.R337C,TP53:NM_001126112:exon10:c.1009C>T:p.R337C,TP53:NM_001276760:exon10:c.892C>T:p.R298C,TP53:NM_001276761:exon10:c.892C>T:p.R298C	0	.	0	0	7.953e-06	0	0	0	0	0	0	0	0	.	.	.	.	-	-	-	-	-	-	-	-	-	-	-	-	-	-	-	-	-	large_intestine	2
17	7574018	7574018	G	T	exonic	TP53	-	nonsynonymous SNV	TP53:NM_001126115:exon6:c.613C>A:p.R205S,TP53:NM_001276697:exon6:c.532C>A:p.R178S,TP53:NM_001126118:exon9:c.892C>A:p.R298S,TP53:NM_000546:exon10:c.1009C>A:p.R337S,TP53:NM_001126112:exon10:c.1009C>A:p.R337S,TP53:NM_001276760:exon10:c.892C>A:p.R298S,TP53:NM_001276761:exon10:c.892C>A:p.R298S	-	-	-	-	-	-	-	-	-	-	-	-	-	-	-	-	-	-	-	-	-	-	-	-	-	-	-	-	-	-	-	-	-	-	large_intestine	1
11	9172291	9172291	G	A	exonic	DENND5A	-	nonsynonymous SNV	DENND5A:NM_001348749:exon13:c.2470C>T:p.R824C,DENND5A:NM_001243254:exon14:c.2542C>T:p.R848C,DENND5A:NM_015213:exon14:c.2542C>T:p.R848C,DENND5A:NM_001348750:exon15:c.2254C>T:p.R752C	0.0003	0.0017	0.0002	0.0003	0.0003	0.0002	6.541e-05	0.0017	0	1.765e-05	0	0	0	0.0017	0.0019	0.0017	0.0019	0.0001	0.0012	0.0002	7.181e-05	0.0001	0.0001	.	0.0012	0	0.0001	0	0	0	0.0012	0.0018	.	0.0002	large_intestine	3
2	1544469	1544469	C	T	exonic	TPO	-	nonsynonymous SNV	TPO:NM_175721:exon14:c.2590C>T:p.R864W,TPO:NM_175722:exon14:c.2203C>T:p.R735W,TPO:NM_001206745:exon15:c.2551C>T:p.R851W,TPO:NM_175719:exon15:c.2551C>T:p.R851W,TPO:NM_000547:exon16:c.2722C>T:p.R908W,TPO:NM_001206744:exon16:c.2722C>T:p.R908W	3.596e-05	0.0002	1.475e-05	6.104e-05	3.977e-05	0	3.267e-05	0.0002	0	0	0	0	0	0.0002	0.0003	0.0002	0.0002	-	-	-	-	-	-	-	-	-	-	-	-	-	-	-	-	-	large_intestine	3
4	30921914	30921914	C	T	exonic	PCDH7	-	nonsynonymous SNV	PCDH7:NM_001173523:exon2:c.3314C>T:p.A1105V,PCDH7:NM_032457:exon2:c.3314C>T:p.A1105V	8.044e-06	5.799e-05	0	1.759e-05	1.194e-05	0	0	5.799e-05	0	0	0	0	0	5.822e-05	6.572e-05	5.855e-05	5.87e-05	-	-	-	-	-	-	-	-	-	-	-	-	-	-	-	-	-	large_intestine	2
4	30921914	30921914	C	A	exonic	PCDH7	-	nonsynonymous SNV	PCDH7:NM_001173523:exon2:c.3314C>A:p.A1105E,PCDH7:NM_032457:exon2:c.3314C>A:p.A1105E	4.022e-06	8.894e-06	0	8.794e-06	3.979e-06	0	0	0	0	8.894e-06	0	0	0	9.062e-06	.	9.853e-06	.	-	-	-	-	-	-	-	-	-	-	-	-	-	-	-	-	-	large_intestine	1
5	37196023	37196023	C	T	exonic	CPLANE1	-	nonsynonymous SNV	CPLANE1:NM_023073:exon21:c.3748G>A:p.A1250T	3.594e-05	6.559e-05	4.432e-05	2.607e-05	4.772e-05	0	6.559e-05	0	0	8.82e-06	0.0003	0	0	6.559e-05	6.561e-05	6.579e-05	6.4e-05	-	-	-	-	-	-	-	-	-	-	-	-	-	-	-	-	-	large_intestine	3
1	248367073	248367073	G	A	exonic	OR2M3	-	nonsynonymous SNV	OR2M3:NM_001004689:exon1:c.704G>A:p.R235H	0.0001	0.0002	0.0001	0.0001	0.0001	0.0002	0	0	0.0001	2.648e-05	0.001	0	0.0002	0.0001	0.0002	0.0002	0.0001	0.0002	0.0003	0.0002	7.185e-05	0.0002	0.0003	.	0	0	0	0.0006	0	0	0.0004	0.0009	.	0.0012	large_intestine	3
5	7802364	7802364	G	A	exonic	ADCY2	-	nonsynonymous SNV	ADCY2:NM_020546:exon21:c.2662G>A:p.V888I	-	-	-	-	-	-	-	-	-	-	-	-	-	-	-	-	-	-	-	-	-	-	-	-	-	-	-	-	-	-	-	-	-	-	large_intestine	3
17	7578455	7578455	C	G	exonic	TP53	-	nonsynonymous SNV	TP53:NM_001126115:exon1:c.79G>C:p.A27P,TP53:NM_001126116:exon1:c.79G>C:p.A27P,TP53:NM_001126117:exon1:c.79G>C:p.A27P,TP53:NM_001126118:exon4:c.358G>C:p.A120P,TP53:NM_000546:exon5:c.475G>C:p.A159P,TP53:NM_001126112:exon5:c.475G>C:p.A159P,TP53:NM_001126113:exon5:c.475G>C:p.A159P,TP53:NM_001126114:exon5:c.475G>C:p.A159P,TP53:NM_001276695:exon5:c.358G>C:p.A120P,TP53:NM_001276696:exon5:c.358G>C:p.A120…	-	-	-	-	-	-	-	-	-	-	-	-	-	-	-	-	-	-	-	-	-	-	-	-	-	-	-	-	-	-	-	-	-	-	large_intestine	3
1	107867468	107867468	G	A	exonic	NTNG1	-	nonsynonymous SNV	NTNG1:NM_001113226:exon3:c.811G>A:p.V271I,NTNG1:NM_001113228:exon3:c.811G>A:p.V271I,NTNG1:NM_001312688:exon3:c.811G>A:p.V271I,NTNG1:NM_001330665:exon3:c.811G>A:p.V271I,NTNG1:NM_001372166:exon3:c.811G>A:p.V271I,NTNG1:NM_001372167:exon3:c.811G>A:p.V271I,NTNG1:NM_001372168:exon3:c.811G>A:p.V271I,NTNG1:NM_001372169:exon3:c.811G>A:p.V271I,NTNG1:NM_001372170:exon3:c.811G>A:p.V271I,NTNG1:NM_001372171:ex…	0	.	0	0	1.193e-05	0	0	0	0	0	0	0	0	.	.	.	.	-	-	-	-	-	-	-	-	-	-	-	-	-	-	-	-	-	large_intestine	3
16	20975196	20975196	G	A	exonic	DNAH3	-	nonsynonymous SNV	DNAH3:NM_001347886:exon53:c.9872C>T:p.T3291M,DNAH3:NM_017539:exon53:c.10010C>T:p.T3337M	1.988e-05	0.0001	7.359e-06	3.461e-05	2.386e-05	0.0001	0	0	0	1.758e-05	0	0	0.0002	8.315e-05	0.0001	0.0001	0.0001	6.371e-05	0.0012	0.0001	0	6.366e-05	0.0001	.	0.0012	0	0	0	0	0	0.0001	.	.	.	large_intestine	3
17	38176550	38176550	G	A	exonic	MED24	-	nonsynonymous SNV	MED24:NM_001079518:exon23:c.2641C>T:p.R881W,MED24:NM_001267797:exon23:c.2641C>T:p.R881W,MED24:NM_014815:exon24:c.2680C>T:p.R894W,MED24:NM_001330211:exon25:c.2737C>T:p.R913W	3.928e-05	8.906e-05	4.62e-05	3.143e-05	0.0002	7.263e-05	8.906e-05	0	0	5.479e-05	0	0	0	9.147e-05	8.909e-05	8.929e-05	0.0002	3.186e-05	6.484e-05	5.726e-05	0	3.183e-05	0	.	0	0	6.484e-05	0	0	0	.	7.345e-05	.	.	large_intestine	3
2	80529941	80529941	C	T	exonic	LRRTM1	-	nonsynonymous SNV	LRRTM1:NM_178839:exon2:c.1004G>A:p.R335H	-	-	-	-	-	-	-	-	-	-	-	-	-	-	-	-	-	-	-	-	-	-	-	-	-	-	-	-	-	-	-	-	-	-	large_intestine	3
16	87866620	87866620	C	T	exonic	SLC7A5	-	nonsynonymous SNV	SLC7A5:NM_003486:exon10:c.1480G>A:p.V494I	3.989e-05	0.0004	4.426e-05	3.474e-05	3.976e-05	0.0004	6.533e-05	0	5.437e-05	8.849e-06	0	0	0	0.0004	0.0004	0.0004	0.0003	9.561e-05	0.0003	0.0001	7.188e-05	9.549e-05	0.0003	.	0	0	0	0	0	0	0.0004	0.0003	.	.	large_intestine	3
1	115258748	115258748	C	A	exonic	NRAS	-	nonsynonymous SNV	NRAS:NM_002524:exon2:c.34G>T:p.G12C	-	-	-	-	-	-	-	-	-	-	-	-	-	-	-	-	-	-	-	-	-	-	-	-	-	-	-	-	-	-	-	-	-	-	large_intestine	3
3	12645699	12645699	G	A	exonic	RAF1	-	nonsynonymous SNV	RAF1:NM_001354695:exon5:c.428C>T:p.S143L,RAF1:NM_001354692:exon6:c.527C>T:p.S176L,RAF1:NM_001354693:exon6:c.671C>T:p.S224L,RAF1:NM_001354694:exon6:c.527C>T:p.S176L,RAF1:NM_001354689:exon7:c.770C>T:p.S257L,RAF1:NM_001354690:exon7:c.770C>T:p.S257L,RAF1:NM_001354691:exon7:c.527C>T:p.S176L,RAF1:NM_002880:exon7:c.770C>T:p.S257L	-	-	-	-	-	-	-	-	-	-	-	-	-	-	-	-	-	-	-	-	-	-	-	-	-	-	-	-	-	-	-	-	-	-	large_intestine	3
11	121028656	121028656	C	T	exonic	TECTA	-	nonsynonymous SNV	TECTA:NM_005422:exon13:c.4412C>T:p.A1471V	-	-	-	-	-	-	-	-	-	-	-	-	-	-	-	-	-	-	-	-	-	-	-	-	-	-	-	-	-	-	-	-	-	-	large_intestine	3
5	174156219	174156219	G	A	exonic	MSX2	-	nonsynonymous SNV	MSX2:NM_002449:exon2:c.437G>A:p.R146H	-	-	-	-	-	-	-	-	-	-	-	-	-	-	-	-	-	-	-	-	-	-	-	-	-	-	-	-	-	-	-	-	-	-	large_intestine	3
1	115258745	115258745	C	G	exonic	NRAS	-	nonsynonymous SNV	NRAS:NM_002524:exon2:c.37G>C:p.G13R	-	-	-	-	-	-	-	-	-	-	-	-	-	-	-	-	-	-	-	-	-	-	-	-	-	-	-	-	-	-	-	-	-	-	large_intestine	3
6	28297163	28297163	G	A	exonic	ZSCAN31	-	nonsynonymous SNV	ZSCAN31:NM_001135216:exon2:c.298C>T:p.R100W,ZSCAN31:NM_001243241:exon2:c.298C>T:p.R100W,ZSCAN31:NM_030899:exon2:c.298C>T:p.R100W,ZSCAN31:NM_001135215:exon6:c.298C>T:p.R100W,ZSCAN31:NM_145909:exon6:c.298C>T:p.R100W	4.776e-05	0.0001	5.155e-05	4.33e-05	5.169e-05	0	9.8e-05	0.0001	0	2.64e-05	0	9.936e-05	0.0002	0.0001	9.833e-05	9.829e-05	5.846e-05	-	-	-	-	-	-	-	-	-	-	-	-	-	-	-	-	-	large_intestine	3
17	27899563	27899563	G	A	exonic	TP53I13	-	nonsynonymous SNV	TP53I13:NM_001346079:exon5:c.788G>A:p.R263H,TP53I13:NM_001346081:exon5:c.569G>A:p.R190H,TP53I13:NM_001346077:exon6:c.842G>A:p.R281H,TP53I13:NM_001346078:exon6:c.842G>A:p.R281H,TP53I13:NM_001346082:exon6:c.569G>A:p.R190H,TP53I13:NM_138349:exon6:c.917G>A:p.R306H	-	-	-	-	-	-	-	-	-	-	-	-	-	-	-	-	-	-	-	-	-	-	-	-	-	-	-	-	-	-	-	-	-	-	large_intestine	3
20	36854123	36854123	C	T	exonic	KIAA1755	-	nonsynonymous SNV	KIAA1755:NM_001029864:exon8:c.2113G>A:p.A705T	2.029e-05	6.687e-05	2.254e-05	1.765e-05	2.386e-05	0	6.687e-05	0	0	2.696e-05	0	0	0	6.687e-05	6.689e-05	6.707e-05	6.529e-05	3.187e-05	0.0001	5.73e-05	0	3.183e-05	0.0001	.	0	0	0	0	0	0	0.0001	0.0003	.	0.0004	large_intestine	3
3	178936083	178936083	A	G	exonic	PIK3CA	-	nonsynonymous SNV	PIK3CA:NM_006218:exon10:c.1625A>G:p.E542G	-	-	-	-	-	-	-	-	-	-	-	-	-	-	-	-	-	-	-	-	-	-	-	-	-	-	-	-	-	-	-	-	-	-	large_intestine	2
3	178936083	178936083	A	C	exonic	PIK3CA	-	nonsynonymous SNV	PIK3CA:NM_006218:exon10:c.1625A>C:p.E542A	-	-	-	-	-	-	-	-	-	-	-	-	-	-	-	-	-	-	-	-	-	-	-	-	-	-	-	-	-	-	-	-	-	-	large_intestine	1
12	120582225	120582225	G	A	exonic	GCN1	-	nonsynonymous SNV	GCN1:NM_006836:exon42:c.5380C>T:p.R1794C	1.205e-05	1.771e-05	7.398e-06	1.756e-05	1.996e-05	0	0	0	0	1.771e-05	0	9.968e-05	0	1.804e-05	2.249e-05	1.96e-05	.	-	-	-	-	-	-	-	-	-	-	-	-	-	-	-	-	-	large_intestine	3
17	7578265	7578265	A	G	exonic	TP53	-	nonsynonymous SNV	TP53:NM_001126115:exon2:c.188T>C:p.I63T,TP53:NM_001126116:exon2:c.188T>C:p.I63T,TP53:NM_001126117:exon2:c.188T>C:p.I63T,TP53:NM_001276697:exon2:c.107T>C:p.I36T,TP53:NM_001276698:exon2:c.107T>C:p.I36T,TP53:NM_001276699:exon2:c.107T>C:p.I36T,TP53:NM_001126118:exon5:c.467T>C:p.I156T,TP53:NM_000546:exon6:c.584T>C:p.I195T,TP53:NM_001126112:exon6:c.584T>C:p.I195T,TP53:NM_001126113:exon6:c.584T>C:p.I195…	0	.	0	0	3.976e-06	0	0	0	0	0	0	0	0	.	.	.	.	-	-	-	-	-	-	-	-	-	-	-	-	-	-	-	-	-	large_intestine	3
3	178936095	178936095	A	G	exonic	PIK3CA	-	nonsynonymous SNV	PIK3CA:NM_006218:exon10:c.1637A>G:p.Q546R	-	-	-	-	-	-	-	-	-	-	-	-	-	-	-	-	-	-	-	-	-	-	-	-	-	-	-	-	-	-	-	-	-	-	large_intestine	3
1	156912567	156912567	G	A	exonic	ARHGEF11	-	nonsynonymous SNV	ARHGEF11:NM_014784:exon32:c.3121C>T:p.R1041W,ARHGEF11:NM_198236:exon33:c.3241C>T:p.R1081W	3.977e-06	6.152e-05	7.359e-06	0	3.976e-06	6.152e-05	0	0	0	0	0	0	0	8.317e-05	6.167e-05	6.711e-05	0.0001	-	-	-	-	-	-	-	-	-	-	-	-	-	-	-	-	-	large_intestine	3
20	37464776	37464776	G	A	exonic	PPP1R16B	-	nonsynonymous SNV	PPP1R16B:NM_001172735:exon2:c.208G>A:p.V70M,PPP1R16B:NM_015568:exon2:c.208G>A:p.V70M	-	-	-	-	-	-	-	-	-	-	-	-	-	-	-	-	-	-	-	-	-	-	-	-	-	-	-	-	-	-	-	-	-	-	large_intestine	3
21	43411860	43411860	C	T	exonic	ZBTB21	-	nonsynonymous SNV	ZBTB21:NM_020727:exon2:c.2345G>A:p.R782H,ZBTB21:NM_001098402:exon3:c.2345G>A:p.R782H,ZBTB21:NM_001320729:exon3:c.1742G>A:p.R581H,ZBTB21:NM_001098403:exon4:c.1742G>A:p.R581H,ZBTB21:NM_001320731:exon4:c.2345G>A:p.R782H	3.979e-06	8.8e-06	7.362e-06	0	3.976e-06	0	0	0	0	8.8e-06	0	0	0	8.965e-06	1.117e-05	9.744e-06	.	-	-	-	-	-	-	-	-	-	-	-	-	-	-	-	-	-	large_intestine	3
18	55103500	55103500	C	G	exonic	ONECUT2	-	nonsynonymous SNV	ONECUT2:NM_004852:exon1:c.552C>G:p.H184Q	8.661e-06	1.89e-05	7.908e-06	9.573e-06	7.56e-05	0	0	0	0	1.89e-05	0	0	0	1.923e-05	2.365e-05	2.074e-05	4.938e-05	-	-	-	-	-	-	-	-	-	-	-	-	-	-	-	-	-	large_intestine	3
7	37955827	37955827	G	A	exonic	SFRP4	-	nonsynonymous SNV	SFRP4:NM_003014:exon1:c.313C>T:p.R105C	-	-	-	-	-	-	-	-	-	-	-	-	-	-	-	-	-	-	-	-	-	-	-	-	-	-	-	-	-	-	-	-	-	-	large_intestine	3
12	25398284	25398284	C	A	exonic	KRAS	-	nonsynonymous SNV	KRAS:NM_001369786:exon2:c.35G>T:p.G12V,KRAS:NM_001369787:exon2:c.35G>T:p.G12V,KRAS:NM_004985:exon2:c.35G>T:p.G12V,KRAS:NM_033360:exon2:c.35G>T:p.G12V	0	.	0	0	3.976e-06	0	0	0	0	0	0	0	0	.	.	.	.	-	-	-	-	-	-	-	-	-	-	-	-	-	-	-	-	-	lung	40
12	25398284	25398284	C	G	exonic	KRAS	-	nonsynonymous SNV	KRAS:NM_001369786:exon2:c.35G>C:p.G12A,KRAS:NM_001369787:exon2:c.35G>C:p.G12A,KRAS:NM_004985:exon2:c.35G>C:p.G12A,KRAS:NM_033360:exon2:c.35G>C:p.G12A	0	.	0	0	3.976e-06	0	0	0	0	0	0	0	0	.	.	.	.	-	-	-	-	-	-	-	-	-	-	-	-	-	-	-	-	-	lung	18
12	25398284	25398284	C	T	exonic	KRAS	-	nonsynonymous SNV	KRAS:NM_001369786:exon2:c.35G>A:p.G12D,KRAS:NM_001369787:exon2:c.35G>A:p.G12D,KRAS:NM_004985:exon2:c.35G>A:p.G12D,KRAS:NM_033360:exon2:c.35G>A:p.G12D	4.011e-06	8.883e-06	0	8.726e-06	1.988e-05	0	0	0	0	8.883e-06	0	0	0	9.051e-06	1.127e-05	9.832e-06	2.369e-05	-	-	-	-	-	-	-	-	-	-	-	-	-	-	-	-	-	lung	18
12	25398285	25398285	C	A	exonic	KRAS	-	nonsynonymous SNV	KRAS:NM_001369786:exon2:c.34G>T:p.G12C,KRAS:NM_001369787:exon2:c.34G>T:p.G12C,KRAS:NM_004985:exon2:c.34G>T:p.G12C,KRAS:NM_033360:exon2:c.34G>T:p.G12C	0	.	0	0	1.988e-05	0	0	0	0	0	0	0	0	.	.	.	.	-	-	-	-	-	-	-	-	-	-	-	-	-	-	-	-	-	lung	57
12	25398285	25398285	C	T	exonic	KRAS	-	nonsynonymous SNV	KRAS:NM_001369786:exon2:c.34G>A:p.G12S,KRAS:NM_001369787:exon2:c.34G>A:p.G12S,KRAS:NM_004985:exon2:c.34G>A:p.G12S,KRAS:NM_033360:exon2:c.34G>A:p.G12S	0	.	0	0	7.953e-06	0	0	0	0	0	0	0	0	.	.	.	.	-	-	-	-	-	-	-	-	-	-	-	-	-	-	-	-	-	lung	5
7	55259515	55259515	T	G	exonic	EGFR	-	nonsynonymous SNV	EGFR:NM_001346941:exon15:c.1772T>G:p.L591R,EGFR:NM_001346897:exon20:c.2438T>G:p.L813R,EGFR:NM_001346899:exon20:c.2438T>G:p.L813R,EGFR:NM_001346898:exon21:c.2573T>G:p.L858R,EGFR:NM_001346900:exon21:c.2414T>G:p.L805R,EGFR:NM_005228:exon21:c.2573T>G:p.L858R	-	-	-	-	-	-	-	-	-	-	-	-	-	-	-	-	-	-	-	-	-	-	-	-	-	-	-	-	-	-	-	-	-	-	lung	23
17	7577120	7577120	C	A	exonic	TP53	-	nonsynonymous SNV	TP53:NM_001126115:exon4:c.422G>T:p.R141L,TP53:NM_001126116:exon4:c.422G>T:p.R141L,TP53:NM_001126117:exon4:c.422G>T:p.R141L,TP53:NM_001276697:exon4:c.341G>T:p.R114L,TP53:NM_001276698:exon4:c.341G>T:p.R114L,TP53:NM_001276699:exon4:c.341G>T:p.R114L,TP53:NM_001126118:exon7:c.701G>T:p.R234L,TP53:NM_000546:exon8:c.818G>T:p.R273L,TP53:NM_001126112:exon8:c.818G>T:p.R273L,TP53:NM_001126113:exon8:c.818G>T:…	3.983e-06	8.809e-06	7.368e-06	0	3.976e-06	0	0	0	0	8.809e-06	0	0	0	8.974e-06	1.118e-05	.	.	-	-	-	-	-	-	-	-	-	-	-	-	-	-	-	-	-	lung	15
17	7577120	7577120	C	T	exonic	TP53	-	nonsynonymous SNV	TP53:NM_001126115:exon4:c.422G>A:p.R141H,TP53:NM_001126116:exon4:c.422G>A:p.R141H,TP53:NM_001126117:exon4:c.422G>A:p.R141H,TP53:NM_001276697:exon4:c.341G>A:p.R114H,TP53:NM_001276698:exon4:c.341G>A:p.R114H,TP53:NM_001276699:exon4:c.341G>A:p.R114H,TP53:NM_001126118:exon7:c.701G>A:p.R234H,TP53:NM_000546:exon8:c.818G>A:p.R273H,TP53:NM_001126112:exon8:c.818G>A:p.R273H,TP53:NM_001126113:exon8:c.818G>A:…	1.593e-05	2.643e-05	2.21e-05	8.671e-06	3.976e-05	0	0	0	0	2.643e-05	0	9.929e-05	0	2.692e-05	3.355e-05	2.925e-05	7.024e-05	-	-	-	-	-	-	-	-	-	-	-	-	-	-	-	-	-	lung	4
17	7577120	7577120	C	G	exonic	TP53	-	nonsynonymous SNV	TP53:NM_001126115:exon4:c.422G>C:p.R141P,TP53:NM_001126116:exon4:c.422G>C:p.R141P,TP53:NM_001126117:exon4:c.422G>C:p.R141P,TP53:NM_001276697:exon4:c.341G>C:p.R114P,TP53:NM_001276698:exon4:c.341G>C:p.R114P,TP53:NM_001276699:exon4:c.341G>C:p.R114P,TP53:NM_001126118:exon7:c.701G>C:p.R234P,TP53:NM_000546:exon8:c.818G>C:p.R273P,TP53:NM_001126112:exon8:c.818G>C:p.R273P,TP53:NM_001126113:exon8:c.818G>C:…	-	-	-	-	-	-	-	-	-	-	-	-	-	-	-	-	-	3.187e-05	0.0001	0	7.189e-05	3.183e-05	0.0001	.	0	0	0	0	0	0	0.0001	.	.	.	lung	3
17	7578457	7578457	C	A	exonic	TP53	-	nonsynonymous SNV	TP53:NM_001126115:exon1:c.77G>T:p.R26L,TP53:NM_001126116:exon1:c.77G>T:p.R26L,TP53:NM_001126117:exon1:c.77G>T:p.R26L,TP53:NM_001126118:exon4:c.356G>T:p.R119L,TP53:NM_000546:exon5:c.473G>T:p.R158L,TP53:NM_001126112:exon5:c.473G>T:p.R158L,TP53:NM_001126113:exon5:c.473G>T:p.R158L,TP53:NM_001126114:exon5:c.473G>T:p.R158L,TP53:NM_001276695:exon5:c.356G>T:p.R119L,TP53:NM_001276696:exon5:c.356G>T:p.R119…	3.98e-06	6.16e-05	7.361e-06	0	3.976e-06	6.16e-05	0	0	0	0	0	0	0	8.325e-05	6.174e-05	.	.	-	-	-	-	-	-	-	-	-	-	-	-	-	-	-	-	-	lung	20
17	7578457	7578457	C	T	exonic	TP53	-	nonsynonymous SNV	TP53:NM_001126115:exon1:c.77G>A:p.R26H,TP53:NM_001126116:exon1:c.77G>A:p.R26H,TP53:NM_001126117:exon1:c.77G>A:p.R26H,TP53:NM_001126118:exon4:c.356G>A:p.R119H,TP53:NM_000546:exon5:c.473G>A:p.R158H,TP53:NM_001126112:exon5:c.473G>A:p.R158H,TP53:NM_001126113:exon5:c.473G>A:p.R158H,TP53:NM_001126114:exon5:c.473G>A:p.R158H,TP53:NM_001276695:exon5:c.356G>A:p.R119H,TP53:NM_001276696:exon5:c.356G>A:p.R119…	3.98e-06	.	7.361e-06	0	3.976e-06	0	0	0	0	0	0	9.93e-05	0	.	.	.	.	-	-	-	-	-	-	-	-	-	-	-	-	-	-	-	-	-	lung	1
17	7578457	7578457	C	G	exonic	TP53	-	nonsynonymous SNV	TP53:NM_001126115:exon1:c.77G>C:p.R26P,TP53:NM_001126116:exon1:c.77G>C:p.R26P,TP53:NM_001126117:exon1:c.77G>C:p.R26P,TP53:NM_001126118:exon4:c.356G>C:p.R119P,TP53:NM_000546:exon5:c.473G>C:p.R158P,TP53:NM_001126112:exon5:c.473G>C:p.R158P,TP53:NM_001126113:exon5:c.473G>C:p.R158P,TP53:NM_001126114:exon5:c.473G>C:p.R158P,TP53:NM_001276695:exon5:c.356G>C:p.R119P,TP53:NM_001276696:exon5:c.356G>C:p.R119…	-	-	-	-	-	-	-	-	-	-	-	-	-	-	-	-	-	-	-	-	-	-	-	-	-	-	-	-	-	-	-	-	-	-	lung	1
3	178936091	178936091	G	A	exonic	PIK3CA	-	nonsynonymous SNV	PIK3CA:NM_006218:exon10:c.1633G>A:p.E545K	4.032e-06	8.879e-06	0	8.821e-06	4.004e-06	0	0	0	0	8.879e-06	0	0	0	9.045e-06	1.127e-05	.	.	-	-	-	-	-	-	-	-	-	-	-	-	-	-	-	-	-	lung	19
3	178936091	178936091	G	C	exonic	PIK3CA	-	nonsynonymous SNV	PIK3CA:NM_006218:exon10:c.1633G>C:p.E545Q	-	-	-	-	-	-	-	-	-	-	-	-	-	-	-	-	-	-	-	-	-	-	-	-	-	-	-	-	-	-	-	-	-	-	lung	2
17	7578461	7578461	C	A	exonic	TP53	-	nonsynonymous SNV	TP53:NM_001126115:exon1:c.73G>T:p.V25F,TP53:NM_001126116:exon1:c.73G>T:p.V25F,TP53:NM_001126117:exon1:c.73G>T:p.V25F,TP53:NM_001126118:exon4:c.352G>T:p.V118F,TP53:NM_000546:exon5:c.469G>T:p.V157F,TP53:NM_001126112:exon5:c.469G>T:p.V157F,TP53:NM_001126113:exon5:c.469G>T:p.V157F,TP53:NM_001126114:exon5:c.469G>T:p.V157F,TP53:NM_001276695:exon5:c.352G>T:p.V118F,TP53:NM_001276696:exon5:c.352G>T:p.V118…	-	-	-	-	-	-	-	-	-	-	-	-	-	-	-	-	-	-	-	-	-	-	-	-	-	-	-	-	-	-	-	-	-	-	lung	16
17	7578461	7578461	C	G	exonic	TP53	-	nonsynonymous SNV	TP53:NM_001126115:exon1:c.73G>C:p.V25L,TP53:NM_001126116:exon1:c.73G>C:p.V25L,TP53:NM_001126117:exon1:c.73G>C:p.V25L,TP53:NM_001126118:exon4:c.352G>C:p.V118L,TP53:NM_000546:exon5:c.469G>C:p.V157L,TP53:NM_001126112:exon5:c.469G>C:p.V157L,TP53:NM_001126113:exon5:c.469G>C:p.V157L,TP53:NM_001126114:exon5:c.469G>C:p.V157L,TP53:NM_001276695:exon5:c.352G>C:p.V118L,TP53:NM_001276696:exon5:c.352G>C:p.V118…	-	-	-	-	-	-	-	-	-	-	-	-	-	-	-	-	-	-	-	-	-	-	-	-	-	-	-	-	-	-	-	-	-	-	lung	2
3	178936082	178936082	G	A	exonic	PIK3CA	-	nonsynonymous SNV	PIK3CA:NM_006218:exon10:c.1624G>A:p.E542K	-	-	-	-	-	-	-	-	-	-	-	-	-	-	-	-	-	-	-	-	-	-	-	-	-	-	-	-	-	-	-	-	-	-	lung	15
17	7577548	7577548	C	A	exonic	TP53	-	nonsynonymous SNV	TP53:NM_001126115:exon3:c.337G>T:p.G113C,TP53:NM_001126116:exon3:c.337G>T:p.G113C,TP53:NM_001126117:exon3:c.337G>T:p.G113C,TP53:NM_001276697:exon3:c.256G>T:p.G86C,TP53:NM_001276698:exon3:c.256G>T:p.G86C,TP53:NM_001276699:exon3:c.256G>T:p.G86C,TP53:NM_001126118:exon6:c.616G>T:p.G206C,TP53:NM_000546:exon7:c.733G>T:p.G245C,TP53:NM_001126112:exon7:c.733G>T:p.G245C,TP53:NM_001126113:exon7:c.733G>T:p.G…	-	-	-	-	-	-	-	-	-	-	-	-	-	-	-	-	-	-	-	-	-	-	-	-	-	-	-	-	-	-	-	-	-	-	lung	9
17	7577548	7577548	C	T	exonic	TP53	-	nonsynonymous SNV	TP53:NM_001126115:exon3:c.337G>A:p.G113S,TP53:NM_001126116:exon3:c.337G>A:p.G113S,TP53:NM_001126117:exon3:c.337G>A:p.G113S,TP53:NM_001276697:exon3:c.256G>A:p.G86S,TP53:NM_001276698:exon3:c.256G>A:p.G86S,TP53:NM_001276699:exon3:c.256G>A:p.G86S,TP53:NM_001126118:exon6:c.616G>A:p.G206S,TP53:NM_000546:exon7:c.733G>A:p.G245S,TP53:NM_001126112:exon7:c.733G>A:p.G245S,TP53:NM_001126113:exon7:c.733G>A:p.G…	0	.	0	0	7.952e-06	0	0	0	0	0	0	0	0	.	.	.	.	3.193e-05	0.0001	5.733e-05	0	3.183e-05	0.0001	.	0	0	0	0	0	0	0.0001	.	.	.	lung	2
17	7577548	7577548	C	G	exonic	TP53	-	nonsynonymous SNV	TP53:NM_001126115:exon3:c.337G>C:p.G113R,TP53:NM_001126116:exon3:c.337G>C:p.G113R,TP53:NM_001126117:exon3:c.337G>C:p.G113R,TP53:NM_001276697:exon3:c.256G>C:p.G86R,TP53:NM_001276698:exon3:c.256G>C:p.G86R,TP53:NM_001276699:exon3:c.256G>C:p.G86R,TP53:NM_001126118:exon6:c.616G>C:p.G206R,TP53:NM_000546:exon7:c.733G>C:p.G245R,TP53:NM_001126112:exon7:c.733G>C:p.G245R,TP53:NM_001126113:exon7:c.733G>C:p.G…	0	.	0	0	3.976e-06	0	0	0	0	0	0	0	0	.	.	.	.	-	-	-	-	-	-	-	-	-	-	-	-	-	-	-	-	-	lung	1
2	178098960	178098960	C	G	exonic	NFE2L2	-	nonsynonymous SNV	NFE2L2:NM_001145412:exon2:c.37G>C:p.D13H,NFE2L2:NM_001145413:exon2:c.37G>C:p.D13H,NFE2L2:NM_001313900:exon2:c.37G>C:p.D13H,NFE2L2:NM_001313901:exon2:c.37G>C:p.D13H,NFE2L2:NM_001313902:exon2:c.85G>C:p.D29H,NFE2L2:NM_001313903:exon2:c.85G>C:p.D29H,NFE2L2:NM_006164:exon2:c.85G>C:p.D29H	-	-	-	-	-	-	-	-	-	-	-	-	-	-	-	-	-	-	-	-	-	-	-	-	-	-	-	-	-	-	-	-	-	-	lung	6
2	178098960	178098960	C	T	exonic	NFE2L2	-	nonsynonymous SNV	NFE2L2:NM_001145412:exon2:c.37G>A:p.D13N,NFE2L2:NM_001145413:exon2:c.37G>A:p.D13N,NFE2L2:NM_001313900:exon2:c.37G>A:p.D13N,NFE2L2:NM_001313901:exon2:c.37G>A:p.D13N,NFE2L2:NM_001313902:exon2:c.85G>A:p.D29N,NFE2L2:NM_001313903:exon2:c.85G>A:p.D29N,NFE2L2:NM_006164:exon2:c.85G>A:p.D29N	-	-	-	-	-	-	-	-	-	-	-	-	-	-	-	-	-	-	-	-	-	-	-	-	-	-	-	-	-	-	-	-	-	-	lung	5
2	178098960	178098960	C	A	exonic	NFE2L2	-	nonsynonymous SNV	NFE2L2:NM_001145412:exon2:c.37G>T:p.D13Y,NFE2L2:NM_001145413:exon2:c.37G>T:p.D13Y,NFE2L2:NM_001313900:exon2:c.37G>T:p.D13Y,NFE2L2:NM_001313901:exon2:c.37G>T:p.D13Y,NFE2L2:NM_001313902:exon2:c.85G>T:p.D29Y,NFE2L2:NM_001313903:exon2:c.85G>T:p.D29Y,NFE2L2:NM_006164:exon2:c.85G>T:p.D29Y	-	-	-	-	-	-	-	-	-	-	-	-	-	-	-	-	-	-	-	-	-	-	-	-	-	-	-	-	-	-	-	-	-	-	lung	1
17	7577547	7577547	C	A	exonic	TP53	-	nonsynonymous SNV	TP53:NM_001126115:exon3:c.338G>T:p.G113V,TP53:NM_001126116:exon3:c.338G>T:p.G113V,TP53:NM_001126117:exon3:c.338G>T:p.G113V,TP53:NM_001276697:exon3:c.257G>T:p.G86V,TP53:NM_001276698:exon3:c.257G>T:p.G86V,TP53:NM_001276699:exon3:c.257G>T:p.G86V,TP53:NM_001126118:exon6:c.617G>T:p.G206V,TP53:NM_000546:exon7:c.734G>T:p.G245V,TP53:NM_001126112:exon7:c.734G>T:p.G245V,TP53:NM_001126113:exon7:c.734G>T:p.G…	3.977e-06	5.437e-05	0	8.653e-06	3.976e-06	0	0	0	5.437e-05	0	0	0	0	5.438e-05	7.454e-05	.	.	-	-	-	-	-	-	-	-	-	-	-	-	-	-	-	-	-	lung	11
3	192516720	192516720	G	C	exonic	MB21D2	-	nonsynonymous SNV	MB21D2:NM_178496:exon2:c.931C>G:p.Q311E	-	-	-	-	-	-	-	-	-	-	-	-	-	-	-	-	-	-	-	-	-	-	-	-	-	-	-	-	-	-	-	-	-	-	lung	10
2	178098944	178098944	C	T	exonic	NFE2L2	-	nonsynonymous SNV	NFE2L2:NM_001145412:exon2:c.53G>A:p.R18Q,NFE2L2:NM_001145413:exon2:c.53G>A:p.R18Q,NFE2L2:NM_001313900:exon2:c.53G>A:p.R18Q,NFE2L2:NM_001313901:exon2:c.53G>A:p.R18Q,NFE2L2:NM_001313902:exon2:c.101G>A:p.R34Q,NFE2L2:NM_006164:exon2:c.101G>A:p.R34Q	-	-	-	-	-	-	-	-	-	-	-	-	-	-	-	-	-	-	-	-	-	-	-	-	-	-	-	-	-	-	-	-	-	-	lung	5
2	178098944	178098944	C	G	exonic	NFE2L2	-	nonsynonymous SNV	NFE2L2:NM_001145412:exon2:c.53G>C:p.R18P,NFE2L2:NM_001145413:exon2:c.53G>C:p.R18P,NFE2L2:NM_001313900:exon2:c.53G>C:p.R18P,NFE2L2:NM_001313901:exon2:c.53G>C:p.R18P,NFE2L2:NM_001313902:exon2:c.101G>C:p.R34P,NFE2L2:NM_006164:exon2:c.101G>C:p.R34P	-	-	-	-	-	-	-	-	-	-	-	-	-	-	-	-	-	-	-	-	-	-	-	-	-	-	-	-	-	-	-	-	-	-	lung	5
17	7578442	7578442	T	C	exonic	TP53	-	nonsynonymous SNV	TP53:NM_001126115:exon1:c.92A>G:p.Y31C,TP53:NM_001126116:exon1:c.92A>G:p.Y31C,TP53:NM_001126117:exon1:c.92A>G:p.Y31C,TP53:NM_001276697:exon1:c.11A>G:p.Y4C,TP53:NM_001276698:exon1:c.11A>G:p.Y4C,TP53:NM_001276699:exon1:c.11A>G:p.Y4C,TP53:NM_001126118:exon4:c.371A>G:p.Y124C,TP53:NM_000546:exon5:c.488A>G:p.Y163C,TP53:NM_001126112:exon5:c.488A>G:p.Y163C,TP53:NM_001126113:exon5:c.488A>G:p.Y163C,TP53:NM…	-	-	-	-	-	-	-	-	-	-	-	-	-	-	-	-	-	-	-	-	-	-	-	-	-	-	-	-	-	-	-	-	-	-	lung	9
3	178952085	178952085	A	G	exonic	PIK3CA	-	nonsynonymous SNV	PIK3CA:NM_006218:exon21:c.3140A>G:p.H1047R	4.028e-06	8.91e-06	0	8.802e-06	3.998e-06	0	0	0	0	8.91e-06	0	0	0	9.079e-06	1.123e-05	.	.	-	-	-	-	-	-	-	-	-	-	-	-	-	-	-	-	-	lung	7
3	178952085	178952085	A	T	exonic	PIK3CA	-	nonsynonymous SNV	PIK3CA:NM_006218:exon21:c.3140A>T:p.H1047L	4.028e-06	8.91e-06	0	8.802e-06	3.998e-06	0	0	0	0	8.91e-06	0	0	0	9.079e-06	1.123e-05	.	.	-	-	-	-	-	-	-	-	-	-	-	-	-	-	-	-	-	lung	2
17	7578271	7578271	T	C	exonic	TP53	-	nonsynonymous SNV	TP53:NM_001126115:exon2:c.182A>G:p.H61R,TP53:NM_001126116:exon2:c.182A>G:p.H61R,TP53:NM_001126117:exon2:c.182A>G:p.H61R,TP53:NM_001276697:exon2:c.101A>G:p.H34R,TP53:NM_001276698:exon2:c.101A>G:p.H34R,TP53:NM_001276699:exon2:c.101A>G:p.H34R,TP53:NM_001126118:exon5:c.461A>G:p.H154R,TP53:NM_000546:exon6:c.578A>G:p.H193R,TP53:NM_001126112:exon6:c.578A>G:p.H193R,TP53:NM_001126113:exon6:c.578A>G:p.H193…	-	-	-	-	-	-	-	-	-	-	-	-	-	-	-	-	-	-	-	-	-	-	-	-	-	-	-	-	-	-	-	-	-	-	lung	4
17	7578271	7578271	T	A	exonic	TP53	-	nonsynonymous SNV	TP53:NM_001126115:exon2:c.182A>T:p.H61L,TP53:NM_001126116:exon2:c.182A>T:p.H61L,TP53:NM_001126117:exon2:c.182A>T:p.H61L,TP53:NM_001276697:exon2:c.101A>T:p.H34L,TP53:NM_001276698:exon2:c.101A>T:p.H34L,TP53:NM_001276699:exon2:c.101A>T:p.H34L,TP53:NM_001126118:exon5:c.461A>T:p.H154L,TP53:NM_000546:exon6:c.578A>T:p.H193L,TP53:NM_001126112:exon6:c.578A>T:p.H193L,TP53:NM_001126113:exon6:c.578A>T:p.H193…	-	-	-	-	-	-	-	-	-	-	-	-	-	-	-	-	-	-	-	-	-	-	-	-	-	-	-	-	-	-	-	-	-	-	lung	3
17	7578271	7578271	T	G	exonic	TP53	-	nonsynonymous SNV	TP53:NM_001126115:exon2:c.182A>C:p.H61P,TP53:NM_001126116:exon2:c.182A>C:p.H61P,TP53:NM_001126117:exon2:c.182A>C:p.H61P,TP53:NM_001276697:exon2:c.101A>C:p.H34P,TP53:NM_001276698:exon2:c.101A>C:p.H34P,TP53:NM_001276699:exon2:c.101A>C:p.H34P,TP53:NM_001126118:exon5:c.461A>C:p.H154P,TP53:NM_000546:exon6:c.578A>C:p.H193P,TP53:NM_001126112:exon6:c.578A>C:p.H193P,TP53:NM_001126113:exon6:c.578A>C:p.H193…	-	-	-	-	-	-	-	-	-	-	-	-	-	-	-	-	-	-	-	-	-	-	-	-	-	-	-	-	-	-	-	-	-	-	lung	2
17	7577538	7577538	C	A	exonic	TP53	-	nonsynonymous SNV	TP53:NM_001126115:exon3:c.347G>T:p.R116L,TP53:NM_001126116:exon3:c.347G>T:p.R116L,TP53:NM_001126117:exon3:c.347G>T:p.R116L,TP53:NM_001276697:exon3:c.266G>T:p.R89L,TP53:NM_001276698:exon3:c.266G>T:p.R89L,TP53:NM_001276699:exon3:c.266G>T:p.R89L,TP53:NM_001126118:exon6:c.626G>T:p.R209L,TP53:NM_000546:exon7:c.743G>T:p.R248L,TP53:NM_001126112:exon7:c.743G>T:p.R248L,TP53:NM_001126113:exon7:c.743G>T:p.R…	-	-	-	-	-	-	-	-	-	-	-	-	-	-	-	-	-	-	-	-	-	-	-	-	-	-	-	-	-	-	-	-	-	-	lung	4
17	7577538	7577538	C	T	exonic	TP53	-	nonsynonymous SNV	TP53:NM_001126115:exon3:c.347G>A:p.R116Q,TP53:NM_001126116:exon3:c.347G>A:p.R116Q,TP53:NM_001126117:exon3:c.347G>A:p.R116Q,TP53:NM_001276697:exon3:c.266G>A:p.R89Q,TP53:NM_001276698:exon3:c.266G>A:p.R89Q,TP53:NM_001276699:exon3:c.266G>A:p.R89Q,TP53:NM_001126118:exon6:c.626G>A:p.R209Q,TP53:NM_000546:exon7:c.743G>A:p.R248Q,TP53:NM_001126112:exon7:c.743G>A:p.R248Q,TP53:NM_001126113:exon7:c.743G>A:p.R…	1.193e-05	2.637e-05	7.358e-06	1.731e-05	2.386e-05	0	0	0	0	2.637e-05	0	0	0	2.687e-05	2.233e-05	1.947e-05	2.338e-05	-	-	-	-	-	-	-	-	-	-	-	-	-	-	-	-	-	lung	3
17	7577538	7577538	C	G	exonic	TP53	-	nonsynonymous SNV	TP53:NM_001126115:exon3:c.347G>C:p.R116P,TP53:NM_001126116:exon3:c.347G>C:p.R116P,TP53:NM_001126117:exon3:c.347G>C:p.R116P,TP53:NM_001276697:exon3:c.266G>C:p.R89P,TP53:NM_001276698:exon3:c.266G>C:p.R89P,TP53:NM_001276699:exon3:c.266G>C:p.R89P,TP53:NM_001126118:exon6:c.626G>C:p.R209P,TP53:NM_000546:exon7:c.743G>C:p.R248P,TP53:NM_001126112:exon7:c.743G>C:p.R248P,TP53:NM_001126113:exon7:c.743G>C:p.R…	-	-	-	-	-	-	-	-	-	-	-	-	-	-	-	-	-	-	-	-	-	-	-	-	-	-	-	-	-	-	-	-	-	-	lung	2
7	140481402	140481402	C	A	exonic	BRAF	-	nonsynonymous SNV	BRAF:NM_001354609:exon11:c.1406G>T:p.G469V,BRAF:NM_004333:exon11:c.1406G>T:p.G469V,BRAF:NM_001374244:exon12:c.1526G>T:p.G509V,BRAF:NM_001374258:exon12:c.1526G>T:p.G509V	-	-	-	-	-	-	-	-	-	-	-	-	-	-	-	-	-	-	-	-	-	-	-	-	-	-	-	-	-	-	-	-	-	-	lung	5
7	140481402	140481402	C	G	exonic	BRAF	-	nonsynonymous SNV	BRAF:NM_001354609:exon11:c.1406G>C:p.G469A,BRAF:NM_004333:exon11:c.1406G>C:p.G469A,BRAF:NM_001374244:exon12:c.1526G>C:p.G509A,BRAF:NM_001374258:exon12:c.1526G>C:p.G509A	3.977e-06	2.891e-05	0	8.654e-06	3.976e-06	0	0	2.891e-05	0	0	0	0	0	2.903e-05	3.277e-05	2.919e-05	5.845e-05	-	-	-	-	-	-	-	-	-	-	-	-	-	-	-	-	-	lung	3
17	7578403	7578403	C	A	exonic	TP53	-	nonsynonymous SNV	TP53:NM_001126115:exon1:c.131G>T:p.C44F,TP53:NM_001126116:exon1:c.131G>T:p.C44F,TP53:NM_001126117:exon1:c.131G>T:p.C44F,TP53:NM_001276697:exon1:c.50G>T:p.C17F,TP53:NM_001276698:exon1:c.50G>T:p.C17F,TP53:NM_001276699:exon1:c.50G>T:p.C17F,TP53:NM_001126118:exon4:c.410G>T:p.C137F,TP53:NM_000546:exon5:c.527G>T:p.C176F,TP53:NM_001126112:exon5:c.527G>T:p.C176F,TP53:NM_001126113:exon5:c.527G>T:p.C176F,T…	3.98e-06	8.803e-06	7.362e-06	0	3.976e-06	0	0	0	0	8.803e-06	0	0	0	8.967e-06	1.118e-05	9.747e-06	.	-	-	-	-	-	-	-	-	-	-	-	-	-	-	-	-	-	lung	5
17	7578403	7578403	C	T	exonic	TP53	-	nonsynonymous SNV	TP53:NM_001126115:exon1:c.131G>A:p.C44Y,TP53:NM_001126116:exon1:c.131G>A:p.C44Y,TP53:NM_001126117:exon1:c.131G>A:p.C44Y,TP53:NM_001276697:exon1:c.50G>A:p.C17Y,TP53:NM_001276698:exon1:c.50G>A:p.C17Y,TP53:NM_001276699:exon1:c.50G>A:p.C17Y,TP53:NM_001126118:exon4:c.410G>A:p.C137Y,TP53:NM_000546:exon5:c.527G>A:p.C176Y,TP53:NM_001126112:exon5:c.527G>A:p.C176Y,TP53:NM_001126113:exon5:c.527G>A:p.C176Y,T…	-	-	-	-	-	-	-	-	-	-	-	-	-	-	-	-	-	-	-	-	-	-	-	-	-	-	-	-	-	-	-	-	-	-	lung	3
17	7577534	7577534	C	A	exonic	TP53	-	nonsynonymous SNV	TP53:NM_001126115:exon3:c.351G>T:p.R117S,TP53:NM_001126116:exon3:c.351G>T:p.R117S,TP53:NM_001126117:exon3:c.351G>T:p.R117S,TP53:NM_001276697:exon3:c.270G>T:p.R90S,TP53:NM_001276698:exon3:c.270G>T:p.R90S,TP53:NM_001276699:exon3:c.270G>T:p.R90S,TP53:NM_001126118:exon6:c.630G>T:p.R210S,TP53:NM_000546:exon7:c.747G>T:p.R249S,TP53:NM_001126112:exon7:c.747G>T:p.R249S,TP53:NM_001126113:exon7:c.747G>T:p.R…	-	-	-	-	-	-	-	-	-	-	-	-	-	-	-	-	-	-	-	-	-	-	-	-	-	-	-	-	-	-	-	-	-	-	lung	6
17	7577534	7577534	C	G	exonic	TP53	-	nonsynonymous SNV	TP53:NM_001126115:exon3:c.351G>C:p.R117S,TP53:NM_001126116:exon3:c.351G>C:p.R117S,TP53:NM_001126117:exon3:c.351G>C:p.R117S,TP53:NM_001276697:exon3:c.270G>C:p.R90S,TP53:NM_001276698:exon3:c.270G>C:p.R90S,TP53:NM_001276699:exon3:c.270G>C:p.R90S,TP53:NM_001126118:exon6:c.630G>C:p.R210S,TP53:NM_000546:exon7:c.747G>C:p.R249S,TP53:NM_001126112:exon7:c.747G>C:p.R249S,TP53:NM_001126113:exon7:c.747G>C:p.R…	-	-	-	-	-	-	-	-	-	-	-	-	-	-	-	-	-	-	-	-	-	-	-	-	-	-	-	-	-	-	-	-	-	-	lung	2
9	21971108	21971108	C	T	exonic	CDKN2A	-	nonsynonymous SNV	CDKN2A:NM_000077:exon2:c.250G>A:p.D84N,CDKN2A:NM_001195132:exon2:c.250G>A:p.D84N,CDKN2A:NM_001363763:exon2:c.97G>A:p.D33N,CDKN2A:NM_058195:exon2:c.293G>A:p.R98Q	0	.	0	0	4.006e-06	0	0	0	0	0	0	0	0	.	.	.	.	-	-	-	-	-	-	-	-	-	-	-	-	-	-	-	-	-	lung	6
9	21971108	21971108	C	A	exonic	CDKN2A	-	nonsynonymous SNV	CDKN2A:NM_000077:exon2:c.250G>T:p.D84Y,CDKN2A:NM_001195132:exon2:c.250G>T:p.D84Y,CDKN2A:NM_001363763:exon2:c.97G>T:p.D33Y,CDKN2A:NM_058195:exon2:c.293G>T:p.R98L	4.319e-06	2.926e-05	7.828e-06	0	2.404e-05	0	0	2.926e-05	0	0	0	0	0	2.937e-05	.	2.948e-05	.	-	-	-	-	-	-	-	-	-	-	-	-	-	-	-	-	-	lung	2
9	21971108	21971108	C	T	exonic	CDKN2A	-	nonsynonymous SNV	CDKN2A:NM_000077:exon2:c.250G>A:p.D84N,CDKN2A:NM_001195132:exon2:c.250G>A:p.D84N,CDKN2A:NM_001363763:exon2:c.97G>A:p.D33N,CDKN2A:NM_058195:exon2:c.293G>A:p.R98Q	0	.	0	0	4.006e-06	0	0	0	0	0	0	0	0	.	.	.	.	-	-	-	-	-	-	-	-	-	-	-	-	-	-	-	-	-	lung	6
9	21971108	21971108	C	A	exonic	CDKN2A	-	nonsynonymous SNV	CDKN2A:NM_000077:exon2:c.250G>T:p.D84Y,CDKN2A:NM_001195132:exon2:c.250G>T:p.D84Y,CDKN2A:NM_001363763:exon2:c.97G>T:p.D33Y,CDKN2A:NM_058195:exon2:c.293G>T:p.R98L	4.319e-06	2.926e-05	7.828e-06	0	2.404e-05	0	0	2.926e-05	0	0	0	0	0	2.937e-05	.	2.948e-05	.	-	-	-	-	-	-	-	-	-	-	-	-	-	-	-	-	-	lung	2
17	7577580	7577580	T	C	exonic	TP53	-	nonsynonymous SNV	TP53:NM_001126115:exon3:c.305A>G:p.Y102C,TP53:NM_001126116:exon3:c.305A>G:p.Y102C,TP53:NM_001126117:exon3:c.305A>G:p.Y102C,TP53:NM_001276697:exon3:c.224A>G:p.Y75C,TP53:NM_001276698:exon3:c.224A>G:p.Y75C,TP53:NM_001276699:exon3:c.224A>G:p.Y75C,TP53:NM_001126118:exon6:c.584A>G:p.Y195C,TP53:NM_000546:exon7:c.701A>G:p.Y234C,TP53:NM_001126112:exon7:c.701A>G:p.Y234C,TP53:NM_001126113:exon7:c.701A>G:p.Y…	3.976e-06	8.79e-06	0	8.653e-06	7.952e-06	0	0	0	0	8.79e-06	0	0	0	8.955e-06	1.117e-05	.	.	-	-	-	-	-	-	-	-	-	-	-	-	-	-	-	-	-	lung	7
17	7577580	7577580	T	G	exonic	TP53	-	nonsynonymous SNV	TP53:NM_001126115:exon3:c.305A>C:p.Y102S,TP53:NM_001126116:exon3:c.305A>C:p.Y102S,TP53:NM_001126117:exon3:c.305A>C:p.Y102S,TP53:NM_001276697:exon3:c.224A>C:p.Y75S,TP53:NM_001276698:exon3:c.224A>C:p.Y75S,TP53:NM_001276699:exon3:c.224A>C:p.Y75S,TP53:NM_001126118:exon6:c.584A>C:p.Y195S,TP53:NM_000546:exon7:c.701A>C:p.Y234S,TP53:NM_001126112:exon7:c.701A>C:p.Y234S,TP53:NM_001126113:exon7:c.701A>C:p.Y…	-	-	-	-	-	-	-	-	-	-	-	-	-	-	-	-	-	-	-	-	-	-	-	-	-	-	-	-	-	-	-	-	-	-	lung	1
2	178098810	178098810	C	G	exonic	NFE2L2	-	nonsynonymous SNV	NFE2L2:NM_001145412:exon2:c.187G>C:p.E63Q,NFE2L2:NM_001145413:exon2:c.187G>C:p.E63Q,NFE2L2:NM_001313900:exon2:c.187G>C:p.E63Q,NFE2L2:NM_001313901:exon2:c.187G>C:p.E63Q,NFE2L2:NM_001313902:exon2:c.235G>C:p.E79Q,NFE2L2:NM_001313904:exon2:c.6G>C:p.K2N,NFE2L2:NM_006164:exon2:c.235G>C:p.E79Q	-	-	-	-	-	-	-	-	-	-	-	-	-	-	-	-	-	-	-	-	-	-	-	-	-	-	-	-	-	-	-	-	-	-	lung	7
2	178098810	178098810	C	T	exonic	NFE2L2	-	nonsynonymous SNV	NFE2L2:NM_001145412:exon2:c.187G>A:p.E63K,NFE2L2:NM_001145413:exon2:c.187G>A:p.E63K,NFE2L2:NM_001313900:exon2:c.187G>A:p.E63K,NFE2L2:NM_001313901:exon2:c.187G>A:p.E63K,NFE2L2:NM_001313902:exon2:c.235G>A:p.E79K,NFE2L2:NM_006164:exon2:c.235G>A:p.E79K	-	-	-	-	-	-	-	-	-	-	-	-	-	-	-	-	-	-	-	-	-	-	-	-	-	-	-	-	-	-	-	-	-	-	lung	1
7	140453136	140453136	A	T	exonic	BRAF	-	nonsynonymous SNV	BRAF:NM_001354609:exon15:c.1799T>A:p.V600E,BRAF:NM_004333:exon15:c.1799T>A:p.V600E,BRAF:NM_001374244:exon16:c.1919T>A:p.V640E,BRAF:NM_001374258:exon16:c.1919T>A:p.V640E	3.98e-06	3.267e-05	7.364e-06	0	1.193e-05	0	3.267e-05	0	0	0	0	0	0	3.267e-05	3.268e-05	3.276e-05	6.373e-05	-	-	-	-	-	-	-	-	-	-	-	-	-	-	-	-	-	lung	8
7	140481411	140481411	C	A	exonic	BRAF	-	nonsynonymous SNV	BRAF:NM_001354609:exon11:c.1397G>T:p.G466V,BRAF:NM_004333:exon11:c.1397G>T:p.G466V,BRAF:NM_001374244:exon12:c.1517G>T:p.G506V,BRAF:NM_001374258:exon12:c.1517G>T:p.G506V	3.977e-06	.	7.359e-06	0	3.976e-06	0	0	0	0	0	4.622e-05	0	0	.	.	.	.	-	-	-	-	-	-	-	-	-	-	-	-	-	-	-	-	-	lung	5
7	140481411	140481411	C	T	exonic	BRAF	-	nonsynonymous SNV	BRAF:NM_001354609:exon11:c.1397G>A:p.G466E,BRAF:NM_004333:exon11:c.1397G>A:p.G466E,BRAF:NM_001374244:exon12:c.1517G>A:p.G506E,BRAF:NM_001374258:exon12:c.1517G>A:p.G506E	-	-	-	-	-	-	-	-	-	-	-	-	-	-	-	-	-	-	-	-	-	-	-	-	-	-	-	-	-	-	-	-	-	-	lung	1
7	140481411	140481411	C	G	exonic	BRAF	-	nonsynonymous SNV	BRAF:NM_001354609:exon11:c.1397G>C:p.G466A,BRAF:NM_004333:exon11:c.1397G>C:p.G466A,BRAF:NM_001374244:exon12:c.1517G>C:p.G506A,BRAF:NM_001374258:exon12:c.1517G>C:p.G506A	-	-	-	-	-	-	-	-	-	-	-	-	-	-	-	-	-	-	-	-	-	-	-	-	-	-	-	-	-	-	-	-	-	-	lung	1
12	25398282	25398282	C	A	exonic	KRAS	-	nonsynonymous SNV	KRAS:NM_001369786:exon2:c.37G>T:p.G13C,KRAS:NM_001369787:exon2:c.37G>T:p.G13C,KRAS:NM_004985:exon2:c.37G>T:p.G13C,KRAS:NM_033360:exon2:c.37G>T:p.G13C	0	.	0	0	7.953e-06	0	0	0	0	0	0	0	0	.	.	.	.	-	-	-	-	-	-	-	-	-	-	-	-	-	-	-	-	-	lung	7
17	7578190	7578190	T	C	exonic	TP53	-	nonsynonymous SNV	TP53:NM_001126115:exon2:c.263A>G:p.Y88C,TP53:NM_001126116:exon2:c.263A>G:p.Y88C,TP53:NM_001126117:exon2:c.263A>G:p.Y88C,TP53:NM_001276697:exon2:c.182A>G:p.Y61C,TP53:NM_001276698:exon2:c.182A>G:p.Y61C,TP53:NM_001276699:exon2:c.182A>G:p.Y61C,TP53:NM_001126118:exon5:c.542A>G:p.Y181C,TP53:NM_000546:exon6:c.659A>G:p.Y220C,TP53:NM_001126112:exon6:c.659A>G:p.Y220C,TP53:NM_001126113:exon6:c.659A>G:p.Y220…	7.955e-06	1.759e-05	7.359e-06	8.656e-06	1.988e-05	0	0	0	0	1.759e-05	0	0	0	1.792e-05	1.117e-05	1.947e-05	2.339e-05	-	-	-	-	-	-	-	-	-	-	-	-	-	-	-	-	-	lung	7
17	7577556	7577556	C	A	exonic	TP53	-	nonsynonymous SNV	TP53:NM_001126115:exon3:c.329G>T:p.C110F,TP53:NM_001126116:exon3:c.329G>T:p.C110F,TP53:NM_001126117:exon3:c.329G>T:p.C110F,TP53:NM_001276697:exon3:c.248G>T:p.C83F,TP53:NM_001276698:exon3:c.248G>T:p.C83F,TP53:NM_001276699:exon3:c.248G>T:p.C83F,TP53:NM_001126118:exon6:c.608G>T:p.C203F,TP53:NM_000546:exon7:c.725G>T:p.C242F,TP53:NM_001126112:exon7:c.725G>T:p.C242F,TP53:NM_001126113:exon7:c.725G>T:p.C…	-	-	-	-	-	-	-	-	-	-	-	-	-	-	-	-	-	-	-	-	-	-	-	-	-	-	-	-	-	-	-	-	-	-	lung	7
13	73649905	73649905	G	C	exonic	KLF5	-	nonsynonymous SNV	KLF5:NM_001286818:exon4:c.982G>C:p.E328Q,KLF5:NM_001730:exon4:c.1255G>C:p.E419Q	-	-	-	-	-	-	-	-	-	-	-	-	-	-	-	-	-	-	-	-	-	-	-	-	-	-	-	-	-	-	-	-	-	-	lung	6
13	73649905	73649905	G	A	exonic	KLF5	-	nonsynonymous SNV	KLF5:NM_001286818:exon4:c.982G>A:p.E328K,KLF5:NM_001730:exon4:c.1255G>A:p.E419K	-	-	-	-	-	-	-	-	-	-	-	-	-	-	-	-	-	-	-	-	-	-	-	-	-	-	-	-	-	-	-	-	-	-	lung	1
17	7578406	7578406	C	T	exonic	TP53	-	nonsynonymous SNV	TP53:NM_001126115:exon1:c.128G>A:p.R43H,TP53:NM_001126116:exon1:c.128G>A:p.R43H,TP53:NM_001126117:exon1:c.128G>A:p.R43H,TP53:NM_001276697:exon1:c.47G>A:p.R16H,TP53:NM_001276698:exon1:c.47G>A:p.R16H,TP53:NM_001276699:exon1:c.47G>A:p.R16H,TP53:NM_001126118:exon4:c.407G>A:p.R136H,TP53:NM_000546:exon5:c.524G>A:p.R175H,TP53:NM_001126112:exon5:c.524G>A:p.R175H,TP53:NM_001126113:exon5:c.524G>A:p.R175H,T…	3.98e-06	8.803e-06	7.362e-06	0	3.976e-06	0	0	0	0	8.803e-06	0	0	0	8.968e-06	1.118e-05	9.747e-06	.	-	-	-	-	-	-	-	-	-	-	-	-	-	-	-	-	-	lung	6
17	7577099	7577099	C	A	exonic	TP53	-	nonsynonymous SNV	TP53:NM_001126115:exon4:c.443G>T:p.R148I,TP53:NM_001126116:exon4:c.443G>T:p.R148I,TP53:NM_001126117:exon4:c.443G>T:p.R148I,TP53:NM_001276697:exon4:c.362G>T:p.R121I,TP53:NM_001276698:exon4:c.362G>T:p.R121I,TP53:NM_001276699:exon4:c.362G>T:p.R121I,TP53:NM_001126118:exon7:c.722G>T:p.R241I,TP53:NM_000546:exon8:c.839G>T:p.R280I,TP53:NM_001126112:exon8:c.839G>T:p.R280I,TP53:NM_001126113:exon8:c.839G>T:…	-	-	-	-	-	-	-	-	-	-	-	-	-	-	-	-	-	-	-	-	-	-	-	-	-	-	-	-	-	-	-	-	-	-	lung	3
17	7577099	7577099	C	G	exonic	TP53	-	nonsynonymous SNV	TP53:NM_001126115:exon4:c.443G>C:p.R148T,TP53:NM_001126116:exon4:c.443G>C:p.R148T,TP53:NM_001126117:exon4:c.443G>C:p.R148T,TP53:NM_001276697:exon4:c.362G>C:p.R121T,TP53:NM_001276698:exon4:c.362G>C:p.R121T,TP53:NM_001276699:exon4:c.362G>C:p.R121T,TP53:NM_001126118:exon7:c.722G>C:p.R241T,TP53:NM_000546:exon8:c.839G>C:p.R280T,TP53:NM_001126112:exon8:c.839G>C:p.R280T,TP53:NM_001126113:exon8:c.839G>C:…	-	-	-	-	-	-	-	-	-	-	-	-	-	-	-	-	-	-	-	-	-	-	-	-	-	-	-	-	-	-	-	-	-	-	lung	2
17	7577099	7577099	C	T	exonic	TP53	-	nonsynonymous SNV	TP53:NM_001126115:exon4:c.443G>A:p.R148K,TP53:NM_001126116:exon4:c.443G>A:p.R148K,TP53:NM_001126117:exon4:c.443G>A:p.R148K,TP53:NM_001276697:exon4:c.362G>A:p.R121K,TP53:NM_001276698:exon4:c.362G>A:p.R121K,TP53:NM_001276699:exon4:c.362G>A:p.R121K,TP53:NM_001126118:exon7:c.722G>A:p.R241K,TP53:NM_000546:exon8:c.839G>A:p.R280K,TP53:NM_001126112:exon8:c.839G>A:p.R280K,TP53:NM_001126113:exon8:c.839G>A:…	-	-	-	-	-	-	-	-	-	-	-	-	-	-	-	-	-	-	-	-	-	-	-	-	-	-	-	-	-	-	-	-	-	-	lung	1
3	41266113	41266113	C	T	exonic	CTNNB1	-	nonsynonymous SNV	CTNNB1:NM_001098209:exon3:c.110C>T:p.S37F,CTNNB1:NM_001098210:exon3:c.110C>T:p.S37F,CTNNB1:NM_001904:exon3:c.110C>T:p.S37F,CTNNB1:NM_001330729:exon4:c.89C>T:p.S30F	-	-	-	-	-	-	-	-	-	-	-	-	-	-	-	-	-	-	-	-	-	-	-	-	-	-	-	-	-	-	-	-	-	-	lung	5
3	41266113	41266113	C	G	exonic	CTNNB1	-	nonsynonymous SNV	CTNNB1:NM_001098209:exon3:c.110C>G:p.S37C,CTNNB1:NM_001098210:exon3:c.110C>G:p.S37C,CTNNB1:NM_001904:exon3:c.110C>G:p.S37C,CTNNB1:NM_001330729:exon4:c.89C>G:p.S30C	-	-	-	-	-	-	-	-	-	-	-	-	-	-	-	-	-	-	-	-	-	-	-	-	-	-	-	-	-	-	-	-	-	-	lung	1
17	7577536	7577536	T	C	exonic	TP53	-	nonsynonymous SNV	TP53:NM_001126115:exon3:c.349A>G:p.R117G,TP53:NM_001126116:exon3:c.349A>G:p.R117G,TP53:NM_001126117:exon3:c.349A>G:p.R117G,TP53:NM_001276697:exon3:c.268A>G:p.R90G,TP53:NM_001276698:exon3:c.268A>G:p.R90G,TP53:NM_001276699:exon3:c.268A>G:p.R90G,TP53:NM_001126118:exon6:c.628A>G:p.R210G,TP53:NM_000546:exon7:c.745A>G:p.R249G,TP53:NM_001126112:exon7:c.745A>G:p.R249G,TP53:NM_001126113:exon7:c.745A>G:p.R…	-	-	-	-	-	-	-	-	-	-	-	-	-	-	-	-	-	-	-	-	-	-	-	-	-	-	-	-	-	-	-	-	-	-	lung	4
17	7577536	7577536	T	A	exonic	TP53	-	nonsynonymous SNV	TP53:NM_001126115:exon3:c.349A>T:p.R117W,TP53:NM_001126116:exon3:c.349A>T:p.R117W,TP53:NM_001126117:exon3:c.349A>T:p.R117W,TP53:NM_001276697:exon3:c.268A>T:p.R90W,TP53:NM_001276698:exon3:c.268A>T:p.R90W,TP53:NM_001276699:exon3:c.268A>T:p.R90W,TP53:NM_001126118:exon6:c.628A>T:p.R210W,TP53:NM_000546:exon7:c.745A>T:p.R249W,TP53:NM_001126112:exon7:c.745A>T:p.R249W,TP53:NM_001126113:exon7:c.745A>T:p.R…	-	-	-	-	-	-	-	-	-	-	-	-	-	-	-	-	-	-	-	-	-	-	-	-	-	-	-	-	-	-	-	-	-	-	lung	2
17	7577570	7577570	C	T	exonic	TP53	-	nonsynonymous SNV	TP53:NM_001126115:exon3:c.315G>A:p.M105I,TP53:NM_001126116:exon3:c.315G>A:p.M105I,TP53:NM_001126117:exon3:c.315G>A:p.M105I,TP53:NM_001276697:exon3:c.234G>A:p.M78I,TP53:NM_001276698:exon3:c.234G>A:p.M78I,TP53:NM_001276699:exon3:c.234G>A:p.M78I,TP53:NM_001126118:exon6:c.594G>A:p.M198I,TP53:NM_000546:exon7:c.711G>A:p.M237I,TP53:NM_001126112:exon7:c.711G>A:p.M237I,TP53:NM_001126113:exon7:c.711G>A:p.M…	3.976e-06	5.437e-05	7.358e-06	0	7.952e-06	0	0	0	5.437e-05	0	0	0	0	5.438e-05	.	5.652e-05	.	-	-	-	-	-	-	-	-	-	-	-	-	-	-	-	-	-	lung	4
17	7577570	7577570	C	G	exonic	TP53	-	nonsynonymous SNV	TP53:NM_001126115:exon3:c.315G>C:p.M105I,TP53:NM_001126116:exon3:c.315G>C:p.M105I,TP53:NM_001126117:exon3:c.315G>C:p.M105I,TP53:NM_001276697:exon3:c.234G>C:p.M78I,TP53:NM_001276698:exon3:c.234G>C:p.M78I,TP53:NM_001276699:exon3:c.234G>C:p.M78I,TP53:NM_001126118:exon6:c.594G>C:p.M198I,TP53:NM_000546:exon7:c.711G>C:p.M237I,TP53:NM_001126112:exon7:c.711G>C:p.M237I,TP53:NM_001126113:exon7:c.711G>C:p.M…	-	-	-	-	-	-	-	-	-	-	-	-	-	-	-	-	-	-	-	-	-	-	-	-	-	-	-	-	-	-	-	-	-	-	lung	1
17	7577570	7577570	C	A	exonic	TP53	-	nonsynonymous SNV	TP53:NM_001126115:exon3:c.315G>T:p.M105I,TP53:NM_001126116:exon3:c.315G>T:p.M105I,TP53:NM_001126117:exon3:c.315G>T:p.M105I,TP53:NM_001276697:exon3:c.234G>T:p.M78I,TP53:NM_001276698:exon3:c.234G>T:p.M78I,TP53:NM_001276699:exon3:c.234G>T:p.M78I,TP53:NM_001126118:exon6:c.594G>T:p.M198I,TP53:NM_000546:exon7:c.711G>T:p.M237I,TP53:NM_001126112:exon7:c.711G>T:p.M237I,TP53:NM_001126113:exon7:c.711G>T:p.M…	-	-	-	-	-	-	-	-	-	-	-	-	-	-	-	-	-	-	-	-	-	-	-	-	-	-	-	-	-	-	-	-	-	-	lung	1
2	178098945	178098945	G	C	exonic	NFE2L2	-	nonsynonymous SNV	NFE2L2:NM_001145412:exon2:c.52C>G:p.R18G,NFE2L2:NM_001145413:exon2:c.52C>G:p.R18G,NFE2L2:NM_001313900:exon2:c.52C>G:p.R18G,NFE2L2:NM_001313901:exon2:c.52C>G:p.R18G,NFE2L2:NM_001313902:exon2:c.100C>G:p.R34G,NFE2L2:NM_006164:exon2:c.100C>G:p.R34G	-	-	-	-	-	-	-	-	-	-	-	-	-	-	-	-	-	-	-	-	-	-	-	-	-	-	-	-	-	-	-	-	-	-	lung	6
2	178098953	178098953	C	G	exonic	NFE2L2	-	nonsynonymous SNV	NFE2L2:NM_001145412:exon2:c.44G>C:p.G15A,NFE2L2:NM_001145413:exon2:c.44G>C:p.G15A,NFE2L2:NM_001313900:exon2:c.44G>C:p.G15A,NFE2L2:NM_001313901:exon2:c.44G>C:p.G15A,NFE2L2:NM_001313902:exon2:c.92G>C:p.G31A,NFE2L2:NM_001313903:exon2:c.92G>C:p.G31A,NFE2L2:NM_006164:exon2:c.92G>C:p.G31A	-	-	-	-	-	-	-	-	-	-	-	-	-	-	-	-	-	-	-	-	-	-	-	-	-	-	-	-	-	-	-	-	-	-	lung	5
2	178098953	178098953	C	A	exonic	NFE2L2	-	nonsynonymous SNV	NFE2L2:NM_001145412:exon2:c.44G>T:p.G15V,NFE2L2:NM_001145413:exon2:c.44G>T:p.G15V,NFE2L2:NM_001313900:exon2:c.44G>T:p.G15V,NFE2L2:NM_001313901:exon2:c.44G>T:p.G15V,NFE2L2:NM_001313902:exon2:c.92G>T:p.G31V,NFE2L2:NM_001313903:exon2:c.92G>T:p.G31V,NFE2L2:NM_006164:exon2:c.92G>T:p.G31V	-	-	-	-	-	-	-	-	-	-	-	-	-	-	-	-	-	-	-	-	-	-	-	-	-	-	-	-	-	-	-	-	-	-	lung	1
17	7577094	7577094	G	A	exonic	TP53	-	nonsynonymous SNV	TP53:NM_001126115:exon4:c.448C>T:p.R150W,TP53:NM_001126116:exon4:c.448C>T:p.R150W,TP53:NM_001126117:exon4:c.448C>T:p.R150W,TP53:NM_001276697:exon4:c.367C>T:p.R123W,TP53:NM_001276698:exon4:c.367C>T:p.R123W,TP53:NM_001276699:exon4:c.367C>T:p.R123W,TP53:NM_001126118:exon7:c.727C>T:p.R243W,TP53:NM_000546:exon8:c.844C>T:p.R282W,TP53:NM_001126112:exon8:c.844C>T:p.R282W,TP53:NM_001126113:exon8:c.844C>T:…	3.978e-06	8.793e-06	0	8.655e-06	7.952e-06	0	0	0	0	8.793e-06	0	0	0	8.957e-06	1.117e-05	.	.	-	-	-	-	-	-	-	-	-	-	-	-	-	-	-	-	-	lung	6
17	7578395	7578395	G	A	exonic	TP53	-	nonsynonymous SNV	TP53:NM_001126115:exon1:c.139C>T:p.H47Y,TP53:NM_001126116:exon1:c.139C>T:p.H47Y,TP53:NM_001126117:exon1:c.139C>T:p.H47Y,TP53:NM_001276697:exon1:c.58C>T:p.H20Y,TP53:NM_001276698:exon1:c.58C>T:p.H20Y,TP53:NM_001276699:exon1:c.58C>T:p.H20Y,TP53:NM_001126118:exon4:c.418C>T:p.H140Y,TP53:NM_000546:exon5:c.535C>T:p.H179Y,TP53:NM_001126112:exon5:c.535C>T:p.H179Y,TP53:NM_001126113:exon5:c.535C>T:p.H179Y,T…	-	-	-	-	-	-	-	-	-	-	-	-	-	-	-	-	-	-	-	-	-	-	-	-	-	-	-	-	-	-	-	-	-	-	lung	4
17	7578395	7578395	G	C	exonic	TP53	-	nonsynonymous SNV	TP53:NM_001126115:exon1:c.139C>G:p.H47D,TP53:NM_001126116:exon1:c.139C>G:p.H47D,TP53:NM_001126117:exon1:c.139C>G:p.H47D,TP53:NM_001276697:exon1:c.58C>G:p.H20D,TP53:NM_001276698:exon1:c.58C>G:p.H20D,TP53:NM_001276699:exon1:c.58C>G:p.H20D,TP53:NM_001126118:exon4:c.418C>G:p.H140D,TP53:NM_000546:exon5:c.535C>G:p.H179D,TP53:NM_001126112:exon5:c.535C>G:p.H179D,TP53:NM_001126113:exon5:c.535C>G:p.H179D,T…	-	-	-	-	-	-	-	-	-	-	-	-	-	-	-	-	-	-	-	-	-	-	-	-	-	-	-	-	-	-	-	-	-	-	lung	1
17	7578395	7578395	G	T	exonic	TP53	-	nonsynonymous SNV	TP53:NM_001126115:exon1:c.139C>A:p.H47N,TP53:NM_001126116:exon1:c.139C>A:p.H47N,TP53:NM_001126117:exon1:c.139C>A:p.H47N,TP53:NM_001276697:exon1:c.58C>A:p.H20N,TP53:NM_001276698:exon1:c.58C>A:p.H20N,TP53:NM_001276699:exon1:c.58C>A:p.H20N,TP53:NM_001126118:exon4:c.418C>A:p.H140N,TP53:NM_000546:exon5:c.535C>A:p.H179N,TP53:NM_001126112:exon5:c.535C>A:p.H179N,TP53:NM_001126113:exon5:c.535C>A:p.H179N,T…	3.979e-06	8.802e-06	7.362e-06	0	7.952e-06	0	0	0	0	8.802e-06	0	0	0	8.967e-06	.	9.746e-06	.	-	-	-	-	-	-	-	-	-	-	-	-	-	-	-	-	-	lung	1
17	7574017	7574017	C	A	exonic	TP53	-	nonsynonymous SNV	TP53:NM_001126115:exon6:c.614G>T:p.R205L,TP53:NM_001276697:exon6:c.533G>T:p.R178L,TP53:NM_001126118:exon9:c.893G>T:p.R298L,TP53:NM_000546:exon10:c.1010G>T:p.R337L,TP53:NM_001126112:exon10:c.1010G>T:p.R337L,TP53:NM_001276760:exon10:c.893G>T:p.R298L,TP53:NM_001276761:exon10:c.893G>T:p.R298L	-	-	-	-	-	-	-	-	-	-	-	-	-	-	-	-	-	-	-	-	-	-	-	-	-	-	-	-	-	-	-	-	-	-	lung	5
17	7574017	7574017	C	G	exonic	TP53	-	nonsynonymous SNV	TP53:NM_001126115:exon6:c.614G>C:p.R205P,TP53:NM_001276697:exon6:c.533G>C:p.R178P,TP53:NM_001126118:exon9:c.893G>C:p.R298P,TP53:NM_000546:exon10:c.1010G>C:p.R337P,TP53:NM_001126112:exon10:c.1010G>C:p.R337P,TP53:NM_001276760:exon10:c.893G>C:p.R298P,TP53:NM_001276761:exon10:c.893G>C:p.R298P	-	-	-	-	-	-	-	-	-	-	-	-	-	-	-	-	-	-	-	-	-	-	-	-	-	-	-	-	-	-	-	-	-	-	lung	1
7	55259524	55259524	T	A	exonic	EGFR	-	nonsynonymous SNV	EGFR:NM_001346941:exon15:c.1781T>A:p.L594Q,EGFR:NM_001346897:exon20:c.2447T>A:p.L816Q,EGFR:NM_001346899:exon20:c.2447T>A:p.L816Q,EGFR:NM_001346898:exon21:c.2582T>A:p.L861Q,EGFR:NM_001346900:exon21:c.2423T>A:p.L808Q,EGFR:NM_005228:exon21:c.2582T>A:p.L861Q	-	-	-	-	-	-	-	-	-	-	-	-	-	-	-	-	-	-	-	-	-	-	-	-	-	-	-	-	-	-	-	-	-	-	lung	5
17	7579358	7579358	C	A	exonic	TP53	-	nonsynonymous SNV	TP53:NM_001126118:exon3:c.212G>T:p.R71L,TP53:NM_000546:exon4:c.329G>T:p.R110L,TP53:NM_001126112:exon4:c.329G>T:p.R110L,TP53:NM_001126113:exon4:c.329G>T:p.R110L,TP53:NM_001126114:exon4:c.329G>T:p.R110L,TP53:NM_001276695:exon4:c.212G>T:p.R71L,TP53:NM_001276696:exon4:c.212G>T:p.R71L,TP53:NM_001276760:exon4:c.212G>T:p.R71L,TP53:NM_001276761:exon4:c.212G>T:p.R71L	0	.	0	0	7.952e-06	0	0	0	0	0	0	0	0	.	.	.	.	-	-	-	-	-	-	-	-	-	-	-	-	-	-	-	-	-	lung	5
17	7578455	7578455	C	G	exonic	TP53	-	nonsynonymous SNV	TP53:NM_001126115:exon1:c.79G>C:p.A27P,TP53:NM_001126116:exon1:c.79G>C:p.A27P,TP53:NM_001126117:exon1:c.79G>C:p.A27P,TP53:NM_001126118:exon4:c.358G>C:p.A120P,TP53:NM_000546:exon5:c.475G>C:p.A159P,TP53:NM_001126112:exon5:c.475G>C:p.A159P,TP53:NM_001126113:exon5:c.475G>C:p.A159P,TP53:NM_001126114:exon5:c.475G>C:p.A159P,TP53:NM_001276695:exon5:c.358G>C:p.A120P,TP53:NM_001276696:exon5:c.358G>C:p.A120…	-	-	-	-	-	-	-	-	-	-	-	-	-	-	-	-	-	-	-	-	-	-	-	-	-	-	-	-	-	-	-	-	-	-	lung	5
17	7578394	7578394	T	C	exonic	TP53	-	nonsynonymous SNV	TP53:NM_001126115:exon1:c.140A>G:p.H47R,TP53:NM_001126116:exon1:c.140A>G:p.H47R,TP53:NM_001126117:exon1:c.140A>G:p.H47R,TP53:NM_001276697:exon1:c.59A>G:p.H20R,TP53:NM_001276698:exon1:c.59A>G:p.H20R,TP53:NM_001276699:exon1:c.59A>G:p.H20R,TP53:NM_001126118:exon4:c.419A>G:p.H140R,TP53:NM_000546:exon5:c.536A>G:p.H179R,TP53:NM_001126112:exon5:c.536A>G:p.H179R,TP53:NM_001126113:exon5:c.536A>G:p.H179R,T…	3.979e-06	.	7.361e-06	0	3.976e-06	0	0	0	0	0	0	9.927e-05	0	.	.	.	.	-	-	-	-	-	-	-	-	-	-	-	-	-	-	-	-	-	lung	3
17	7578394	7578394	T	A	exonic	TP53	-	nonsynonymous SNV	TP53:NM_001126115:exon1:c.140A>T:p.H47L,TP53:NM_001126116:exon1:c.140A>T:p.H47L,TP53:NM_001126117:exon1:c.140A>T:p.H47L,TP53:NM_001276697:exon1:c.59A>T:p.H20L,TP53:NM_001276698:exon1:c.59A>T:p.H20L,TP53:NM_001276699:exon1:c.59A>T:p.H20L,TP53:NM_001126118:exon4:c.419A>T:p.H140L,TP53:NM_000546:exon5:c.536A>T:p.H179L,TP53:NM_001126112:exon5:c.536A>T:p.H179L,TP53:NM_001126113:exon5:c.536A>T:p.H179L,T…	-	-	-	-	-	-	-	-	-	-	-	-	-	-	-	-	-	-	-	-	-	-	-	-	-	-	-	-	-	-	-	-	-	-	lung	2
9	21971036	21971036	C	A	exonic	CDKN2A	-	nonsynonymous SNV	CDKN2A:NM_000077:exon2:c.322G>T:p.D108Y,CDKN2A:NM_001195132:exon2:c.322G>T:p.D108Y,CDKN2A:NM_001363763:exon2:c.169G>T:p.D57Y,CDKN2A:NM_058195:exon2:c.365G>T:p.R122L	0	.	0	0	4e-06	0	0	0	0	0	0	0	0	.	.	.	.	-	-	-	-	-	-	-	-	-	-	-	-	-	-	-	-	-	lung	4
9	21971036	21971036	C	T	exonic	CDKN2A	-	nonsynonymous SNV	CDKN2A:NM_000077:exon2:c.322G>A:p.D108N,CDKN2A:NM_001195132:exon2:c.322G>A:p.D108N,CDKN2A:NM_001363763:exon2:c.169G>A:p.D57N,CDKN2A:NM_058195:exon2:c.365G>A:p.R122Q	-	-	-	-	-	-	-	-	-	-	-	-	-	-	-	-	-	-	-	-	-	-	-	-	-	-	-	-	-	-	-	-	-	-	lung	1
9	21971036	21971036	C	A	exonic	CDKN2A	-	nonsynonymous SNV	CDKN2A:NM_000077:exon2:c.322G>T:p.D108Y,CDKN2A:NM_001195132:exon2:c.322G>T:p.D108Y,CDKN2A:NM_001363763:exon2:c.169G>T:p.D57Y,CDKN2A:NM_058195:exon2:c.365G>T:p.R122L	0	.	0	0	4e-06	0	0	0	0	0	0	0	0	.	.	.	.	-	-	-	-	-	-	-	-	-	-	-	-	-	-	-	-	-	lung	4
9	21971036	21971036	C	T	exonic	CDKN2A	-	nonsynonymous SNV	CDKN2A:NM_000077:exon2:c.322G>A:p.D108N,CDKN2A:NM_001195132:exon2:c.322G>A:p.D108N,CDKN2A:NM_001363763:exon2:c.169G>A:p.D57N,CDKN2A:NM_058195:exon2:c.365G>A:p.R122Q	-	-	-	-	-	-	-	-	-	-	-	-	-	-	-	-	-	-	-	-	-	-	-	-	-	-	-	-	-	-	-	-	-	-	lung	1
17	7578469	7578469	C	A	exonic	TP53	-	nonsynonymous SNV	TP53:NM_001126115:exon1:c.65G>T:p.G22V,TP53:NM_001126116:exon1:c.65G>T:p.G22V,TP53:NM_001126117:exon1:c.65G>T:p.G22V,TP53:NM_001126118:exon4:c.344G>T:p.G115V,TP53:NM_000546:exon5:c.461G>T:p.G154V,TP53:NM_001126112:exon5:c.461G>T:p.G154V,TP53:NM_001126113:exon5:c.461G>T:p.G154V,TP53:NM_001126114:exon5:c.461G>T:p.G154V,TP53:NM_001276695:exon5:c.344G>T:p.G115V,TP53:NM_001276696:exon5:c.344G>T:p.G115…	-	-	-	-	-	-	-	-	-	-	-	-	-	-	-	-	-	-	-	-	-	-	-	-	-	-	-	-	-	-	-	-	-	-	lung	5
17	7577121	7577121	G	A	exonic	TP53	-	nonsynonymous SNV	TP53:NM_001126115:exon4:c.421C>T:p.R141C,TP53:NM_001126116:exon4:c.421C>T:p.R141C,TP53:NM_001126117:exon4:c.421C>T:p.R141C,TP53:NM_001276697:exon4:c.340C>T:p.R114C,TP53:NM_001276698:exon4:c.340C>T:p.R114C,TP53:NM_001276699:exon4:c.340C>T:p.R114C,TP53:NM_001126118:exon7:c.700C>T:p.R234C,TP53:NM_000546:exon8:c.817C>T:p.R273C,TP53:NM_001126112:exon8:c.817C>T:p.R273C,TP53:NM_001126113:exon8:c.817C>T:…	1.196e-05	5.443e-05	1.475e-05	8.679e-06	1.193e-05	0	0	0	5.443e-05	8.818e-06	4.631e-05	0	0	5.444e-05	7.459e-05	5.658e-05	.	0	.	0	0	3.183e-05	0	.	0	0	0	0	0	0	.	.	.	.	lung	2
17	7577121	7577121	G	C	exonic	TP53	-	nonsynonymous SNV	TP53:NM_001126115:exon4:c.421C>G:p.R141G,TP53:NM_001126116:exon4:c.421C>G:p.R141G,TP53:NM_001126117:exon4:c.421C>G:p.R141G,TP53:NM_001276697:exon4:c.340C>G:p.R114G,TP53:NM_001276698:exon4:c.340C>G:p.R114G,TP53:NM_001276699:exon4:c.340C>G:p.R114G,TP53:NM_001126118:exon7:c.700C>G:p.R234G,TP53:NM_000546:exon8:c.817C>G:p.R273G,TP53:NM_001126112:exon8:c.817C>G:p.R273G,TP53:NM_001126113:exon8:c.817C>G:…	-	-	-	-	-	-	-	-	-	-	-	-	-	-	-	-	-	-	-	-	-	-	-	-	-	-	-	-	-	-	-	-	-	-	lung	2
17	7577121	7577121	G	T	exonic	TP53	-	nonsynonymous SNV	TP53:NM_001126115:exon4:c.421C>A:p.R141S,TP53:NM_001126116:exon4:c.421C>A:p.R141S,TP53:NM_001126117:exon4:c.421C>A:p.R141S,TP53:NM_001276697:exon4:c.340C>A:p.R114S,TP53:NM_001276698:exon4:c.340C>A:p.R114S,TP53:NM_001276699:exon4:c.340C>A:p.R114S,TP53:NM_001126118:exon7:c.700C>A:p.R234S,TP53:NM_000546:exon8:c.817C>A:p.R273S,TP53:NM_001126112:exon8:c.817C>A:p.R273S,TP53:NM_001126113:exon8:c.817C>A:…	0	.	0	0	7.952e-06	0	0	0	0	0	0	0	0	.	.	.	.	-	-	-	-	-	-	-	-	-	-	-	-	-	-	-	-	-	lung	1
17	7577574	7577574	T	C	exonic	TP53	-	nonsynonymous SNV	TP53:NM_001126115:exon3:c.311A>G:p.Y104C,TP53:NM_001126116:exon3:c.311A>G:p.Y104C,TP53:NM_001126117:exon3:c.311A>G:p.Y104C,TP53:NM_001276697:exon3:c.230A>G:p.Y77C,TP53:NM_001276698:exon3:c.230A>G:p.Y77C,TP53:NM_001276699:exon3:c.230A>G:p.Y77C,TP53:NM_001126118:exon6:c.590A>G:p.Y197C,TP53:NM_000546:exon7:c.707A>G:p.Y236C,TP53:NM_001126112:exon7:c.707A>G:p.Y236C,TP53:NM_001126113:exon7:c.707A>G:p.Y…	-	-	-	-	-	-	-	-	-	-	-	-	-	-	-	-	-	-	-	-	-	-	-	-	-	-	-	-	-	-	-	-	-	-	lung	5
17	7578208	7578208	T	C	exonic	TP53	-	nonsynonymous SNV	TP53:NM_001126115:exon2:c.245A>G:p.H82R,TP53:NM_001126116:exon2:c.245A>G:p.H82R,TP53:NM_001126117:exon2:c.245A>G:p.H82R,TP53:NM_001276697:exon2:c.164A>G:p.H55R,TP53:NM_001276698:exon2:c.164A>G:p.H55R,TP53:NM_001276699:exon2:c.164A>G:p.H55R,TP53:NM_001126118:exon5:c.524A>G:p.H175R,TP53:NM_000546:exon6:c.641A>G:p.H214R,TP53:NM_001126112:exon6:c.641A>G:p.H214R,TP53:NM_001126113:exon6:c.641A>G:p.H214…	-	-	-	-	-	-	-	-	-	-	-	-	-	-	-	-	-	-	-	-	-	-	-	-	-	-	-	-	-	-	-	-	-	-	lung	5
17	7577106	7577106	G	C	exonic	TP53	-	nonsynonymous SNV	TP53:NM_001126115:exon4:c.436C>G:p.P146A,TP53:NM_001126116:exon4:c.436C>G:p.P146A,TP53:NM_001126117:exon4:c.436C>G:p.P146A,TP53:NM_001276697:exon4:c.355C>G:p.P119A,TP53:NM_001276698:exon4:c.355C>G:p.P119A,TP53:NM_001276699:exon4:c.355C>G:p.P119A,TP53:NM_001126118:exon7:c.715C>G:p.P239A,TP53:NM_000546:exon8:c.832C>G:p.P278A,TP53:NM_001126112:exon8:c.832C>G:p.P278A,TP53:NM_001126113:exon8:c.832C>G:…	-	-	-	-	-	-	-	-	-	-	-	-	-	-	-	-	-	-	-	-	-	-	-	-	-	-	-	-	-	-	-	-	-	-	lung	3
17	7577106	7577106	G	A	exonic	TP53	-	nonsynonymous SNV	TP53:NM_001126115:exon4:c.436C>T:p.P146S,TP53:NM_001126116:exon4:c.436C>T:p.P146S,TP53:NM_001126117:exon4:c.436C>T:p.P146S,TP53:NM_001276697:exon4:c.355C>T:p.P119S,TP53:NM_001276698:exon4:c.355C>T:p.P119S,TP53:NM_001276699:exon4:c.355C>T:p.P119S,TP53:NM_001126118:exon7:c.715C>T:p.P239S,TP53:NM_000546:exon8:c.832C>T:p.P278S,TP53:NM_001126112:exon8:c.832C>T:p.P278S,TP53:NM_001126113:exon8:c.832C>T:…	-	-	-	-	-	-	-	-	-	-	-	-	-	-	-	-	-	-	-	-	-	-	-	-	-	-	-	-	-	-	-	-	-	-	lung	2
17	7579374	7579374	C	A	exonic	TP53	-	nonsynonymous SNV	TP53:NM_001126118:exon3:c.196G>T:p.G66C,TP53:NM_000546:exon4:c.313G>T:p.G105C,TP53:NM_001126112:exon4:c.313G>T:p.G105C,TP53:NM_001126113:exon4:c.313G>T:p.G105C,TP53:NM_001126114:exon4:c.313G>T:p.G105C,TP53:NM_001276695:exon4:c.196G>T:p.G66C,TP53:NM_001276696:exon4:c.196G>T:p.G66C,TP53:NM_001276760:exon4:c.196G>T:p.G66C,TP53:NM_001276761:exon4:c.196G>T:p.G66C	-	-	-	-	-	-	-	-	-	-	-	-	-	-	-	-	-	-	-	-	-	-	-	-	-	-	-	-	-	-	-	-	-	-	lung	4
17	7579374	7579374	C	T	exonic	TP53	-	nonsynonymous SNV	TP53:NM_001126118:exon3:c.196G>A:p.G66S,TP53:NM_000546:exon4:c.313G>A:p.G105S,TP53:NM_001126112:exon4:c.313G>A:p.G105S,TP53:NM_001126113:exon4:c.313G>A:p.G105S,TP53:NM_001126114:exon4:c.313G>A:p.G105S,TP53:NM_001276695:exon4:c.196G>A:p.G66S,TP53:NM_001276696:exon4:c.196G>A:p.G66S,TP53:NM_001276760:exon4:c.196G>A:p.G66S,TP53:NM_001276761:exon4:c.196G>A:p.G66S	-	-	-	-	-	-	-	-	-	-	-	-	-	-	-	-	-	-	-	-	-	-	-	-	-	-	-	-	-	-	-	-	-	-	lung	1
19	10600417	10600417	C	A	exonic	KEAP1	-	nonsynonymous SNV	KEAP1:NM_012289:exon4:c.1438G>T:p.G480W,KEAP1:NM_203500:exon4:c.1438G>T:p.G480W	-	-	-	-	-	-	-	-	-	-	-	-	-	-	-	-	-	-	-	-	-	-	-	-	-	-	-	-	-	-	-	-	-	-	lung	5
17	7577551	7577551	C	A	exonic	TP53	-	nonsynonymous SNV	TP53:NM_001126115:exon3:c.334G>T:p.G112C,TP53:NM_001126116:exon3:c.334G>T:p.G112C,TP53:NM_001126117:exon3:c.334G>T:p.G112C,TP53:NM_001276697:exon3:c.253G>T:p.G85C,TP53:NM_001276698:exon3:c.253G>T:p.G85C,TP53:NM_001276699:exon3:c.253G>T:p.G85C,TP53:NM_001126118:exon6:c.613G>T:p.G205C,TP53:NM_000546:exon7:c.730G>T:p.G244C,TP53:NM_001126112:exon7:c.730G>T:p.G244C,TP53:NM_001126113:exon7:c.730G>T:p.G…	-	-	-	-	-	-	-	-	-	-	-	-	-	-	-	-	-	-	-	-	-	-	-	-	-	-	-	-	-	-	-	-	-	-	lung	3
17	7577551	7577551	C	T	exonic	TP53	-	nonsynonymous SNV	TP53:NM_001126115:exon3:c.334G>A:p.G112S,TP53:NM_001126116:exon3:c.334G>A:p.G112S,TP53:NM_001126117:exon3:c.334G>A:p.G112S,TP53:NM_001276697:exon3:c.253G>A:p.G85S,TP53:NM_001276698:exon3:c.253G>A:p.G85S,TP53:NM_001276699:exon3:c.253G>A:p.G85S,TP53:NM_001126118:exon6:c.613G>A:p.G205S,TP53:NM_000546:exon7:c.730G>A:p.G244S,TP53:NM_001126112:exon7:c.730G>A:p.G244S,TP53:NM_001126113:exon7:c.730G>A:p.G…	-	-	-	-	-	-	-	-	-	-	-	-	-	-	-	-	-	-	-	-	-	-	-	-	-	-	-	-	-	-	-	-	-	-	lung	2
12	119617367	119617367	G	A	exonic	HSPB8	-	nonsynonymous SNV	HSPB8:NM_014365:exon1:c.250G>A:p.E84K	2.405e-05	0.0001	4.447e-05	0	2.784e-05	0	0	0.0001	0	0	0	0	0.0003	0.0001	0.0001	0.0001	0.0001	6.376e-05	0.0001	5.727e-05	7.19e-05	6.366e-05	0.0001	.	0	0	6.489e-05	0	0	0	0.0001	7.353e-05	.	.	lung	4
12	119617367	119617367	G	C	exonic	HSPB8	-	nonsynonymous SNV	HSPB8:NM_014365:exon1:c.250G>C:p.E84Q	-	-	-	-	-	-	-	-	-	-	-	-	-	-	-	-	-	-	-	-	-	-	-	-	-	-	-	-	-	-	-	-	-	-	lung	1
17	7577082	7577082	C	G	exonic	TP53	-	nonsynonymous SNV	TP53:NM_001126115:exon4:c.460G>C:p.E154Q,TP53:NM_001126116:exon4:c.460G>C:p.E154Q,TP53:NM_001126117:exon4:c.460G>C:p.E154Q,TP53:NM_001276697:exon4:c.379G>C:p.E127Q,TP53:NM_001276698:exon4:c.379G>C:p.E127Q,TP53:NM_001276699:exon4:c.379G>C:p.E127Q,TP53:NM_001126118:exon7:c.739G>C:p.E247Q,TP53:NM_000546:exon8:c.856G>C:p.E286Q,TP53:NM_001126112:exon8:c.856G>C:p.E286Q,TP53:NM_001126113:exon8:c.856G>C:…	-	-	-	-	-	-	-	-	-	-	-	-	-	-	-	-	-	-	-	-	-	-	-	-	-	-	-	-	-	-	-	-	-	-	lung	3
17	7577082	7577082	C	T	exonic	TP53	-	nonsynonymous SNV	TP53:NM_001126115:exon4:c.460G>A:p.E154K,TP53:NM_001126116:exon4:c.460G>A:p.E154K,TP53:NM_001126117:exon4:c.460G>A:p.E154K,TP53:NM_001276697:exon4:c.379G>A:p.E127K,TP53:NM_001276698:exon4:c.379G>A:p.E127K,TP53:NM_001276699:exon4:c.379G>A:p.E127K,TP53:NM_001126118:exon7:c.739G>A:p.E247K,TP53:NM_000546:exon8:c.856G>A:p.E286K,TP53:NM_001126112:exon8:c.856G>A:p.E286K,TP53:NM_001126113:exon8:c.856G>A:…	-	-	-	-	-	-	-	-	-	-	-	-	-	-	-	-	-	-	-	-	-	-	-	-	-	-	-	-	-	-	-	-	-	-	lung	2
17	7579373	7579373	C	T	exonic	TP53	-	nonsynonymous SNV	TP53:NM_001126118:exon3:c.197G>A:p.G66D,TP53:NM_000546:exon4:c.314G>A:p.G105D,TP53:NM_001126112:exon4:c.314G>A:p.G105D,TP53:NM_001126113:exon4:c.314G>A:p.G105D,TP53:NM_001126114:exon4:c.314G>A:p.G105D,TP53:NM_001276695:exon4:c.197G>A:p.G66D,TP53:NM_001276696:exon4:c.197G>A:p.G66D,TP53:NM_001276760:exon4:c.197G>A:p.G66D,TP53:NM_001276761:exon4:c.197G>A:p.G66D	0	.	0	0	3.976e-06	0	0	0	0	0	0	0	0	.	.	.	.	-	-	-	-	-	-	-	-	-	-	-	-	-	-	-	-	-	lung	2
17	7579373	7579373	C	A	exonic	TP53	-	nonsynonymous SNV	TP53:NM_001126118:exon3:c.197G>T:p.G66V,TP53:NM_000546:exon4:c.314G>T:p.G105V,TP53:NM_001126112:exon4:c.314G>T:p.G105V,TP53:NM_001126113:exon4:c.314G>T:p.G105V,TP53:NM_001126114:exon4:c.314G>T:p.G105V,TP53:NM_001276695:exon4:c.197G>T:p.G66V,TP53:NM_001276696:exon4:c.197G>T:p.G66V,TP53:NM_001276760:exon4:c.197G>T:p.G66V,TP53:NM_001276761:exon4:c.197G>T:p.G66V	-	-	-	-	-	-	-	-	-	-	-	-	-	-	-	-	-	-	-	-	-	-	-	-	-	-	-	-	-	-	-	-	-	-	lung	2
17	51900791	51900791	G	A	exonic	KIF2B	-	nonsynonymous SNV	KIF2B:NM_032559:exon1:c.397G>A:p.V133M	3.984e-06	6.167e-05	0	8.674e-06	3.976e-06	6.167e-05	0	0	0	0	0	0	0	8.332e-05	6.181e-05	6.722e-05	0.0001	-	-	-	-	-	-	-	-	-	-	-	-	-	-	-	-	-	lung	2
17	51900791	51900791	G	T	exonic	KIF2B	-	nonsynonymous SNV	KIF2B:NM_032559:exon1:c.397G>T:p.V133L	-	-	-	-	-	-	-	-	-	-	-	-	-	-	-	-	-	-	-	-	-	-	-	-	-	-	-	-	-	-	-	-	-	-	lung	2
9	21971111	21971111	G	A	exonic	CDKN2A	-	nonsynonymous SNV	CDKN2A:NM_000077:exon2:c.247C>T:p.H83Y,CDKN2A:NM_001195132:exon2:c.247C>T:p.H83Y,CDKN2A:NM_001363763:exon2:c.94C>T:p.H32Y,CDKN2A:NM_058195:exon2:c.290C>T:p.A97V	0	.	0	0	2.404e-05	0	0	0	0	0	0	0	0	.	.	.	.	-	-	-	-	-	-	-	-	-	-	-	-	-	-	-	-	-	lung	4
9	21971111	21971111	G	A	exonic	CDKN2A	-	nonsynonymous SNV	CDKN2A:NM_000077:exon2:c.247C>T:p.H83Y,CDKN2A:NM_001195132:exon2:c.247C>T:p.H83Y,CDKN2A:NM_001363763:exon2:c.94C>T:p.H32Y,CDKN2A:NM_058195:exon2:c.290C>T:p.A97V	0	.	0	0	2.404e-05	0	0	0	0	0	0	0	0	.	.	.	.	-	-	-	-	-	-	-	-	-	-	-	-	-	-	-	-	-	lung	4
17	7578413	7578413	C	T	exonic	TP53	-	nonsynonymous SNV	TP53:NM_001126115:exon1:c.121G>A:p.V41M,TP53:NM_001126116:exon1:c.121G>A:p.V41M,TP53:NM_001126117:exon1:c.121G>A:p.V41M,TP53:NM_001276697:exon1:c.40G>A:p.V14M,TP53:NM_001276698:exon1:c.40G>A:p.V14M,TP53:NM_001276699:exon1:c.40G>A:p.V14M,TP53:NM_001126118:exon4:c.400G>A:p.V134M,TP53:NM_000546:exon5:c.517G>A:p.V173M,TP53:NM_001126112:exon5:c.517G>A:p.V173M,TP53:NM_001126113:exon5:c.517G>A:p.V173M,T…	-	-	-	-	-	-	-	-	-	-	-	-	-	-	-	-	-	-	-	-	-	-	-	-	-	-	-	-	-	-	-	-	-	-	lung	2
17	7578413	7578413	C	A	exonic	TP53	-	nonsynonymous SNV	TP53:NM_001126115:exon1:c.121G>T:p.V41L,TP53:NM_001126116:exon1:c.121G>T:p.V41L,TP53:NM_001126117:exon1:c.121G>T:p.V41L,TP53:NM_001276697:exon1:c.40G>T:p.V14L,TP53:NM_001276698:exon1:c.40G>T:p.V14L,TP53:NM_001276699:exon1:c.40G>T:p.V14L,TP53:NM_001126118:exon4:c.400G>T:p.V134L,TP53:NM_000546:exon5:c.517G>T:p.V173L,TP53:NM_001126112:exon5:c.517G>T:p.V173L,TP53:NM_001126113:exon5:c.517G>T:p.V173L,T…	-	-	-	-	-	-	-	-	-	-	-	-	-	-	-	-	-	-	-	-	-	-	-	-	-	-	-	-	-	-	-	-	-	-	lung	2
1	115256529	115256529	T	A	exonic	NRAS	-	nonsynonymous SNV	NRAS:NM_002524:exon3:c.182A>T:p.Q61L	-	-	-	-	-	-	-	-	-	-	-	-	-	-	-	-	-	-	-	-	-	-	-	-	-	-	-	-	-	-	-	-	-	-	lung	2
1	115256529	115256529	T	C	exonic	NRAS	-	nonsynonymous SNV	NRAS:NM_002524:exon3:c.182A>G:p.Q61R	-	-	-	-	-	-	-	-	-	-	-	-	-	-	-	-	-	-	-	-	-	-	-	-	-	-	-	-	-	-	-	-	-	-	lung	2
11	55587917	55587917	C	A	exonic	OR5D18	-	nonsynonymous SNV	OR5D18:NM_001001952:exon1:c.812C>A:p.T271K	-	-	-	-	-	-	-	-	-	-	-	-	-	-	-	-	-	-	-	-	-	-	-	-	-	-	-	-	-	-	-	-	-	-	lung	4
17	7577539	7577539	G	A	exonic	TP53	-	nonsynonymous SNV	TP53:NM_001126115:exon3:c.346C>T:p.R116W,TP53:NM_001126116:exon3:c.346C>T:p.R116W,TP53:NM_001126117:exon3:c.346C>T:p.R116W,TP53:NM_001276697:exon3:c.265C>T:p.R89W,TP53:NM_001276698:exon3:c.265C>T:p.R89W,TP53:NM_001276699:exon3:c.265C>T:p.R89W,TP53:NM_001126118:exon6:c.625C>T:p.R209W,TP53:NM_000546:exon7:c.742C>T:p.R248W,TP53:NM_001126112:exon7:c.742C>T:p.R248W,TP53:NM_001126113:exon7:c.742C>T:p.R…	3.977e-06	8.791e-06	7.358e-06	0	1.193e-05	0	0	0	0	8.791e-06	0	0	0	8.955e-06	1.117e-05	9.733e-06	2.338e-05	-	-	-	-	-	-	-	-	-	-	-	-	-	-	-	-	-	lung	4
9	21971186	21971186	G	A	exonic	CDKN2A	-	stopgain	CDKN2A:NM_000077:exon2:c.172C>T:p.R58X,CDKN2A:NM_001195132:exon2:c.172C>T:p.R58X,CDKN2A:NM_001363763:exon2:c.19C>T:p.R7X	0	.	0	0	1.208e-05	0	0	0	0	0	0	0	0	.	.	.	.	-	-	-	-	-	-	-	-	-	-	-	-	-	-	-	-	-	lung	4
17	7578407	7578407	G	C	exonic	TP53	-	nonsynonymous SNV	TP53:NM_001126115:exon1:c.127C>G:p.R43G,TP53:NM_001126116:exon1:c.127C>G:p.R43G,TP53:NM_001126117:exon1:c.127C>G:p.R43G,TP53:NM_001276697:exon1:c.46C>G:p.R16G,TP53:NM_001276698:exon1:c.46C>G:p.R16G,TP53:NM_001276699:exon1:c.46C>G:p.R16G,TP53:NM_001126118:exon4:c.406C>G:p.R136G,TP53:NM_000546:exon5:c.523C>G:p.R175G,TP53:NM_001126112:exon5:c.523C>G:p.R175G,TP53:NM_001126113:exon5:c.523C>G:p.R175G,T…	-	-	-	-	-	-	-	-	-	-	-	-	-	-	-	-	-	-	-	-	-	-	-	-	-	-	-	-	-	-	-	-	-	-	lung	4
17	7577141	7577141	C	A	exonic	TP53	-	nonsynonymous SNV	TP53:NM_001126115:exon4:c.401G>T:p.G134V,TP53:NM_001126116:exon4:c.401G>T:p.G134V,TP53:NM_001126117:exon4:c.401G>T:p.G134V,TP53:NM_001276697:exon4:c.320G>T:p.G107V,TP53:NM_001276698:exon4:c.320G>T:p.G107V,TP53:NM_001276699:exon4:c.320G>T:p.G107V,TP53:NM_001126118:exon7:c.680G>T:p.G227V,TP53:NM_000546:exon8:c.797G>T:p.G266V,TP53:NM_001126112:exon8:c.797G>T:p.G266V,TP53:NM_001126113:exon8:c.797G>T:…	0	.	0	0	7.952e-06	0	0	0	0	0	0	0	0	.	.	.	.	-	-	-	-	-	-	-	-	-	-	-	-	-	-	-	-	-	lung	4
1	240255893	240255893	G	T	exonic	FMN2	-	nonsynonymous SNV	FMN2:NM_001305424:exon1:c.484G>T:p.D162Y,FMN2:NM_001348094:exon1:c.484G>T:p.D162Y,FMN2:NM_020066:exon1:c.484G>T:p.D162Y	8.029e-06	.	7.411e-06	8.76e-06	7.953e-06	0	0	0	0	0	9.263e-05	0	0	.	.	.	.	-	-	-	-	-	-	-	-	-	-	-	-	-	-	-	-	-	lung	4
17	7578454	7578454	G	A	exonic	TP53	-	nonsynonymous SNV	TP53:NM_001126115:exon1:c.80C>T:p.A27V,TP53:NM_001126116:exon1:c.80C>T:p.A27V,TP53:NM_001126117:exon1:c.80C>T:p.A27V,TP53:NM_001126118:exon4:c.359C>T:p.A120V,TP53:NM_000546:exon5:c.476C>T:p.A159V,TP53:NM_001126112:exon5:c.476C>T:p.A159V,TP53:NM_001126113:exon5:c.476C>T:p.A159V,TP53:NM_001126114:exon5:c.476C>T:p.A159V,TP53:NM_001276695:exon5:c.359C>T:p.A120V,TP53:NM_001276696:exon5:c.359C>T:p.A120…	-	-	-	-	-	-	-	-	-	-	-	-	-	-	-	-	-	-	-	-	-	-	-	-	-	-	-	-	-	-	-	-	-	-	lung	4
17	7577550	7577550	C	A	exonic	TP53	-	nonsynonymous SNV	TP53:NM_001126115:exon3:c.335G>T:p.G112V,TP53:NM_001126116:exon3:c.335G>T:p.G112V,TP53:NM_001126117:exon3:c.335G>T:p.G112V,TP53:NM_001276697:exon3:c.254G>T:p.G85V,TP53:NM_001276698:exon3:c.254G>T:p.G85V,TP53:NM_001276699:exon3:c.254G>T:p.G85V,TP53:NM_001126118:exon6:c.614G>T:p.G205V,TP53:NM_000546:exon7:c.731G>T:p.G244V,TP53:NM_001126112:exon7:c.731G>T:p.G244V,TP53:NM_001126113:exon7:c.731G>T:p.G…	-	-	-	-	-	-	-	-	-	-	-	-	-	-	-	-	-	-	-	-	-	-	-	-	-	-	-	-	-	-	-	-	-	-	lung	2
17	7577550	7577550	C	T	exonic	TP53	-	nonsynonymous SNV	TP53:NM_001126115:exon3:c.335G>A:p.G112D,TP53:NM_001126116:exon3:c.335G>A:p.G112D,TP53:NM_001126117:exon3:c.335G>A:p.G112D,TP53:NM_001276697:exon3:c.254G>A:p.G85D,TP53:NM_001276698:exon3:c.254G>A:p.G85D,TP53:NM_001276699:exon3:c.254G>A:p.G85D,TP53:NM_001126118:exon6:c.614G>A:p.G205D,TP53:NM_000546:exon7:c.731G>A:p.G244D,TP53:NM_001126112:exon7:c.731G>A:p.G244D,TP53:NM_001126113:exon7:c.731G>A:p.G…	-	-	-	-	-	-	-	-	-	-	-	-	-	-	-	-	-	-	-	-	-	-	-	-	-	-	-	-	-	-	-	-	-	-	lung	2
19	10602581	10602581	C	A	exonic	KEAP1	-	nonsynonymous SNV	KEAP1:NM_012289:exon3:c.997G>T:p.G333C,KEAP1:NM_203500:exon3:c.997G>T:p.G333C	-	-	-	-	-	-	-	-	-	-	-	-	-	-	-	-	-	-	-	-	-	-	-	-	-	-	-	-	-	-	-	-	-	-	lung	2
19	10602581	10602581	C	T	exonic	KEAP1	-	nonsynonymous SNV	KEAP1:NM_012289:exon3:c.997G>A:p.G333S,KEAP1:NM_203500:exon3:c.997G>A:p.G333S	-	-	-	-	-	-	-	-	-	-	-	-	-	-	-	-	-	-	-	-	-	-	-	-	-	-	-	-	-	-	-	-	-	-	lung	2
17	7578235	7578235	T	C	exonic	TP53	-	nonsynonymous SNV	TP53:NM_001126115:exon2:c.218A>G:p.Y73C,TP53:NM_001126116:exon2:c.218A>G:p.Y73C,TP53:NM_001126117:exon2:c.218A>G:p.Y73C,TP53:NM_001276697:exon2:c.137A>G:p.Y46C,TP53:NM_001276698:exon2:c.137A>G:p.Y46C,TP53:NM_001276699:exon2:c.137A>G:p.Y46C,TP53:NM_001126118:exon5:c.497A>G:p.Y166C,TP53:NM_000546:exon6:c.614A>G:p.Y205C,TP53:NM_001126112:exon6:c.614A>G:p.Y205C,TP53:NM_001126113:exon6:c.614A>G:p.Y205…	-	-	-	-	-	-	-	-	-	-	-	-	-	-	-	-	-	-	-	-	-	-	-	-	-	-	-	-	-	-	-	-	-	-	lung	4
19	10602767	10602767	C	A	exonic	KEAP1	-	nonsynonymous SNV	KEAP1:NM_012289:exon3:c.811G>T:p.V271L,KEAP1:NM_203500:exon3:c.811G>T:p.V271L	-	-	-	-	-	-	-	-	-	-	-	-	-	-	-	-	-	-	-	-	-	-	-	-	-	-	-	-	-	-	-	-	-	-	lung	3
19	10602767	10602767	C	T	exonic	KEAP1	-	nonsynonymous SNV	KEAP1:NM_012289:exon3:c.811G>A:p.V271M,KEAP1:NM_203500:exon3:c.811G>A:p.V271M	-	-	-	-	-	-	-	-	-	-	-	-	-	-	-	-	-	-	-	-	-	-	-	-	-	-	-	-	-	-	-	-	-	-	lung	1
2	178098957	178098957	G	A	exonic	NFE2L2	-	nonsynonymous SNV	NFE2L2:NM_001145412:exon2:c.40C>T:p.L14F,NFE2L2:NM_001145413:exon2:c.40C>T:p.L14F,NFE2L2:NM_001313900:exon2:c.40C>T:p.L14F,NFE2L2:NM_001313901:exon2:c.40C>T:p.L14F,NFE2L2:NM_001313902:exon2:c.88C>T:p.L30F,NFE2L2:NM_001313903:exon2:c.88C>T:p.L30F,NFE2L2:NM_006164:exon2:c.88C>T:p.L30F	-	-	-	-	-	-	-	-	-	-	-	-	-	-	-	-	-	-	-	-	-	-	-	-	-	-	-	-	-	-	-	-	-	-	lung	4
19	10600447	10600447	G	A	exonic	KEAP1	-	nonsynonymous SNV	KEAP1:NM_012289:exon4:c.1408C>T:p.R470C,KEAP1:NM_203500:exon4:c.1408C>T:p.R470C	-	-	-	-	-	-	-	-	-	-	-	-	-	-	-	-	-	-	-	-	-	-	-	-	-	-	-	-	-	-	-	-	-	-	lung	3
19	10600447	10600447	G	T	exonic	KEAP1	-	nonsynonymous SNV	KEAP1:NM_012289:exon4:c.1408C>A:p.R470S,KEAP1:NM_203500:exon4:c.1408C>A:p.R470S	-	-	-	-	-	-	-	-	-	-	-	-	-	-	-	-	-	-	-	-	-	-	-	-	-	-	-	-	-	-	-	-	-	-	lung	1
6	26197163	26197163	C	G	exonic	H3C4	-	nonsynonymous SNV	H3C4:NM_003530:exon2:c.316G>C:p.E106Q	-	-	-	-	-	-	-	-	-	-	-	-	-	-	-	-	-	-	-	-	-	-	-	-	-	-	-	-	-	-	-	-	-	-	lung	3
6	26197163	26197163	C	T	exonic	H3C4	-	nonsynonymous SNV	H3C4:NM_003530:exon2:c.316G>A:p.E106K	-	-	-	-	-	-	-	-	-	-	-	-	-	-	-	-	-	-	-	-	-	-	-	-	-	-	-	-	-	-	-	-	-	-	lung	1
11	1605902	1605902	G	T	exonic	KRTAP5-1	-	nonsynonymous SNV	KRTAP5-1:NM_001005922:exon1:c.578C>A:p.S193Y	-	-	-	-	-	-	-	-	-	-	-	-	-	-	-	-	-	-	-	-	-	-	-	-	-	-	-	-	-	-	-	-	-	-	lung	4
17	7574026	7574026	C	A	exonic	TP53	-	nonsynonymous SNV	TP53:NM_001126115:exon6:c.605G>T:p.G202V,TP53:NM_001276697:exon6:c.524G>T:p.G175V,TP53:NM_001126118:exon9:c.884G>T:p.G295V,TP53:NM_000546:exon10:c.1001G>T:p.G334V,TP53:NM_001126112:exon10:c.1001G>T:p.G334V,TP53:NM_001276760:exon10:c.884G>T:p.G295V,TP53:NM_001276761:exon10:c.884G>T:p.G295V	-	-	-	-	-	-	-	-	-	-	-	-	-	-	-	-	-	-	-	-	-	-	-	-	-	-	-	-	-	-	-	-	-	-	lung	4
17	7578272	7578272	G	T	exonic	TP53	-	nonsynonymous SNV	TP53:NM_001126115:exon2:c.181C>A:p.H61N,TP53:NM_001126116:exon2:c.181C>A:p.H61N,TP53:NM_001126117:exon2:c.181C>A:p.H61N,TP53:NM_001276697:exon2:c.100C>A:p.H34N,TP53:NM_001276698:exon2:c.100C>A:p.H34N,TP53:NM_001276699:exon2:c.100C>A:p.H34N,TP53:NM_001126118:exon5:c.460C>A:p.H154N,TP53:NM_000546:exon6:c.577C>A:p.H193N,TP53:NM_001126112:exon6:c.577C>A:p.H193N,TP53:NM_001126113:exon6:c.577C>A:p.H193…	-	-	-	-	-	-	-	-	-	-	-	-	-	-	-	-	-	-	-	-	-	-	-	-	-	-	-	-	-	-	-	-	-	-	lung	2
17	7578272	7578272	G	C	exonic	TP53	-	nonsynonymous SNV	TP53:NM_001126115:exon2:c.181C>G:p.H61D,TP53:NM_001126116:exon2:c.181C>G:p.H61D,TP53:NM_001126117:exon2:c.181C>G:p.H61D,TP53:NM_001276697:exon2:c.100C>G:p.H34D,TP53:NM_001276698:exon2:c.100C>G:p.H34D,TP53:NM_001276699:exon2:c.100C>G:p.H34D,TP53:NM_001126118:exon5:c.460C>G:p.H154D,TP53:NM_000546:exon6:c.577C>G:p.H193D,TP53:NM_001126112:exon6:c.577C>G:p.H193D,TP53:NM_001126113:exon6:c.577C>G:p.H193…	-	-	-	-	-	-	-	-	-	-	-	-	-	-	-	-	-	-	-	-	-	-	-	-	-	-	-	-	-	-	-	-	-	-	lung	1
17	7578272	7578272	G	A	exonic	TP53	-	nonsynonymous SNV	TP53:NM_001126115:exon2:c.181C>T:p.H61Y,TP53:NM_001126116:exon2:c.181C>T:p.H61Y,TP53:NM_001126117:exon2:c.181C>T:p.H61Y,TP53:NM_001276697:exon2:c.100C>T:p.H34Y,TP53:NM_001276698:exon2:c.100C>T:p.H34Y,TP53:NM_001276699:exon2:c.100C>T:p.H34Y,TP53:NM_001126118:exon5:c.460C>T:p.H154Y,TP53:NM_000546:exon6:c.577C>T:p.H193Y,TP53:NM_001126112:exon6:c.577C>T:p.H193Y,TP53:NM_001126113:exon6:c.577C>T:p.H193…	-	-	-	-	-	-	-	-	-	-	-	-	-	-	-	-	-	-	-	-	-	-	-	-	-	-	-	-	-	-	-	-	-	-	lung	1
5	33577084	33577084	G	T	exonic	ADAMTS12	-	nonsynonymous SNV	ADAMTS12:NM_001324512:exon17:c.2792C>A:p.P931Q,ADAMTS12:NM_030955:exon19:c.3047C>A:p.P1016Q	-	-	-	-	-	-	-	-	-	-	-	-	-	-	-	-	-	-	-	-	-	-	-	-	-	-	-	-	-	-	-	-	-	-	lung	3
1	190067754	190067754	C	A	exonic	BRINP3	-	nonsynonymous SNV	BRINP3:NM_001317188:exon7:c.1389G>T:p.L463F,BRINP3:NM_199051:exon8:c.1695G>T:p.L565F	-	-	-	-	-	-	-	-	-	-	-	-	-	-	-	-	-	-	-	-	-	-	-	-	-	-	-	-	-	-	-	-	-	-	lung	2
1	190067754	190067754	C	G	exonic	BRINP3	-	nonsynonymous SNV	BRINP3:NM_001317188:exon7:c.1389G>C:p.L463F,BRINP3:NM_199051:exon8:c.1695G>C:p.L565F	-	-	-	-	-	-	-	-	-	-	-	-	-	-	-	-	-	-	-	-	-	-	-	-	-	-	-	-	-	-	-	-	-	-	lung	1
6	26032069	26032069	C	T	exonic	H3C2	-	nonsynonymous SNV	H3C2:NM_003537:exon1:c.220G>A:p.E74K	-	-	-	-	-	-	-	-	-	-	-	-	-	-	-	-	-	-	-	-	-	-	-	-	-	-	-	-	-	-	-	-	-	-	lung	3
1	155874261	155874261	C	A	exonic	RIT1	-	nonsynonymous SNV	RIT1:NM_001256820:exon4:c.162G>T:p.M54I,RIT1:NM_001256821:exon5:c.321G>T:p.M107I,RIT1:NM_006912:exon5:c.270G>T:p.M90I	-	-	-	-	-	-	-	-	-	-	-	-	-	-	-	-	-	-	-	-	-	-	-	-	-	-	-	-	-	-	-	-	-	-	lung	3
21	31964831	31964831	G	T	exonic	KRTAP6-3	-	nonsynonymous SNV	KRTAP6-3:NM_181605:exon1:c.67G>T:p.G23W	-	-	-	-	-	-	-	-	-	-	-	-	-	-	-	-	-	-	-	-	-	-	-	-	-	-	-	-	-	-	-	-	-	-	lung	2
21	31964831	31964831	G	A	exonic	KRTAP6-3	-	nonsynonymous SNV	KRTAP6-3:NM_181605:exon1:c.67G>A:p.G23R	-	-	-	-	-	-	-	-	-	-	-	-	-	-	-	-	-	-	-	-	-	-	-	-	-	-	-	-	-	-	-	-	-	-	lung	1
1	248525769	248525769	C	A	exonic	OR2T4	-	nonsynonymous SNV	OR2T4:NM_001004696:exon1:c.887C>A:p.S296Y	-	-	-	-	-	-	-	-	-	-	-	-	-	-	-	-	-	-	-	-	-	-	-	-	-	-	-	-	-	-	-	-	-	-	lung	2
1	248525769	248525769	C	T	exonic	OR2T4	-	nonsynonymous SNV	OR2T4:NM_001004696:exon1:c.887C>T:p.S296F	-	-	-	-	-	-	-	-	-	-	-	-	-	-	-	-	-	-	-	-	-	-	-	-	-	-	-	-	-	-	-	-	-	-	lung	1
14	19553711	19553711	G	T	exonic	POTEG	-	nonsynonymous SNV	POTEG:NM_001005356:exon1:c.295G>T:p.G99C	-	-	-	-	-	-	-	-	-	-	-	-	-	-	-	-	-	-	-	-	-	-	-	-	-	-	-	-	-	-	-	-	-	-	lung	3
17	7578268	7578268	A	C	exonic	TP53	-	nonsynonymous SNV	TP53:NM_001126115:exon2:c.185T>G:p.L62R,TP53:NM_001126116:exon2:c.185T>G:p.L62R,TP53:NM_001126117:exon2:c.185T>G:p.L62R,TP53:NM_001276697:exon2:c.104T>G:p.L35R,TP53:NM_001276698:exon2:c.104T>G:p.L35R,TP53:NM_001276699:exon2:c.104T>G:p.L35R,TP53:NM_001126118:exon5:c.464T>G:p.L155R,TP53:NM_000546:exon6:c.581T>G:p.L194R,TP53:NM_001126112:exon6:c.581T>G:p.L194R,TP53:NM_001126113:exon6:c.581T>G:p.L194…	3.976e-06	.	7.357e-06	0	3.976e-06	0	0	0	0	0	0	9.921e-05	0	.	.	.	.	-	-	-	-	-	-	-	-	-	-	-	-	-	-	-	-	-	lung	2
17	7578268	7578268	A	T	exonic	TP53	-	nonsynonymous SNV	TP53:NM_001126115:exon2:c.185T>A:p.L62H,TP53:NM_001126116:exon2:c.185T>A:p.L62H,TP53:NM_001126117:exon2:c.185T>A:p.L62H,TP53:NM_001276697:exon2:c.104T>A:p.L35H,TP53:NM_001276698:exon2:c.104T>A:p.L35H,TP53:NM_001276699:exon2:c.104T>A:p.L35H,TP53:NM_001126118:exon5:c.464T>A:p.L155H,TP53:NM_000546:exon6:c.581T>A:p.L194H,TP53:NM_001126112:exon6:c.581T>A:p.L194H,TP53:NM_001126113:exon6:c.581T>A:p.L194…	-	-	-	-	-	-	-	-	-	-	-	-	-	-	-	-	-	-	-	-	-	-	-	-	-	-	-	-	-	-	-	-	-	-	lung	1
17	7577097	7577097	C	T	exonic	TP53	-	nonsynonymous SNV	TP53:NM_001126115:exon4:c.445G>A:p.D149N,TP53:NM_001126116:exon4:c.445G>A:p.D149N,TP53:NM_001126117:exon4:c.445G>A:p.D149N,TP53:NM_001276697:exon4:c.364G>A:p.D122N,TP53:NM_001276698:exon4:c.364G>A:p.D122N,TP53:NM_001276699:exon4:c.364G>A:p.D122N,TP53:NM_001126118:exon7:c.724G>A:p.D242N,TP53:NM_000546:exon8:c.841G>A:p.D281N,TP53:NM_001126112:exon8:c.841G>A:p.D281N,TP53:NM_001126113:exon8:c.841G>A:…	3.977e-06	6.153e-05	7.359e-06	0	3.976e-06	6.153e-05	0	0	0	0	0	0	0	.	6.168e-05	6.712e-05	0.0001	-	-	-	-	-	-	-	-	-	-	-	-	-	-	-	-	-	lung	2
17	7577097	7577097	C	A	exonic	TP53	-	nonsynonymous SNV	TP53:NM_001126115:exon4:c.445G>T:p.D149Y,TP53:NM_001126116:exon4:c.445G>T:p.D149Y,TP53:NM_001126117:exon4:c.445G>T:p.D149Y,TP53:NM_001276697:exon4:c.364G>T:p.D122Y,TP53:NM_001276698:exon4:c.364G>T:p.D122Y,TP53:NM_001276699:exon4:c.364G>T:p.D122Y,TP53:NM_001126118:exon7:c.724G>T:p.D242Y,TP53:NM_000546:exon8:c.841G>T:p.D281Y,TP53:NM_001126112:exon8:c.841G>T:p.D281Y,TP53:NM_001126113:exon8:c.841G>T:…	-	-	-	-	-	-	-	-	-	-	-	-	-	-	-	-	-	-	-	-	-	-	-	-	-	-	-	-	-	-	-	-	-	-	lung	1
2	185802585	185802585	C	A	exonic	ZNF804A	-	nonsynonymous SNV	ZNF804A:NM_194250:exon4:c.2462C>A:p.P821H	-	-	-	-	-	-	-	-	-	-	-	-	-	-	-	-	-	-	-	-	-	-	-	-	-	-	-	-	-	-	-	-	-	-	lung	2
2	185802585	185802585	C	G	exonic	ZNF804A	-	nonsynonymous SNV	ZNF804A:NM_194250:exon4:c.2462C>G:p.P821R	-	-	-	-	-	-	-	-	-	-	-	-	-	-	-	-	-	-	-	-	-	-	-	-	-	-	-	-	-	-	-	-	-	-	lung	1
17	7577535	7577535	C	A	exonic	TP53	-	nonsynonymous SNV	TP53:NM_001126115:exon3:c.350G>T:p.R117M,TP53:NM_001126116:exon3:c.350G>T:p.R117M,TP53:NM_001126117:exon3:c.350G>T:p.R117M,TP53:NM_001276697:exon3:c.269G>T:p.R90M,TP53:NM_001276698:exon3:c.269G>T:p.R90M,TP53:NM_001276699:exon3:c.269G>T:p.R90M,TP53:NM_001126118:exon6:c.629G>T:p.R210M,TP53:NM_000546:exon7:c.746G>T:p.R249M,TP53:NM_001126112:exon7:c.746G>T:p.R249M,TP53:NM_001126113:exon7:c.746G>T:p.R…	-	-	-	-	-	-	-	-	-	-	-	-	-	-	-	-	-	-	-	-	-	-	-	-	-	-	-	-	-	-	-	-	-	-	lung	3
11	30925143	30925143	G	C	exonic	DCDC1	-	nonsynonymous SNV	DCDC1:NM_020869:exon13:c.1717C>G:p.R573G,DCDC1:NM_001367979:exon32:c.4396C>G:p.R1466G	-	-	-	-	-	-	-	-	-	-	-	-	-	-	-	-	-	-	-	-	-	-	-	-	-	-	-	-	-	-	-	-	-	-	lung	1
11	30925143	30925143	G	T	exonic	DCDC1	-	nonsynonymous SNV	DCDC1:NM_020869:exon13:c.1717C>A:p.R573S,DCDC1:NM_001367979:exon32:c.4396C>A:p.R1466S	-	-	-	-	-	-	-	-	-	-	-	-	-	-	-	-	-	-	-	-	-	-	-	-	-	-	-	-	-	-	-	-	-	-	lung	1
11	30925143	30925143	G	A	exonic	DCDC1	-	nonsynonymous SNV	DCDC1:NM_020869:exon13:c.1717C>T:p.R573C,DCDC1:NM_001367979:exon32:c.4396C>T:p.R1466C	8.221e-06	1.842e-05	1.521e-05	0	1.205e-05	0	0	0	0	1.842e-05	0	0	0	1.877e-05	2.342e-05	2.038e-05	.	-	-	-	-	-	-	-	-	-	-	-	-	-	-	-	-	-	lung	1
7	140453155	140453155	C	T	exonic	BRAF	-	nonsynonymous SNV	BRAF:NM_001354609:exon15:c.1780G>A:p.D594N,BRAF:NM_004333:exon15:c.1780G>A:p.D594N,BRAF:NM_001374244:exon16:c.1900G>A:p.D634N,BRAF:NM_001374258:exon16:c.1900G>A:p.D634N	-	-	-	-	-	-	-	-	-	-	-	-	-	-	-	-	-	-	-	-	-	-	-	-	-	-	-	-	-	-	-	-	-	-	lung	2
7	140453155	140453155	C	G	exonic	BRAF	-	nonsynonymous SNV	BRAF:NM_001354609:exon15:c.1780G>C:p.D594H,BRAF:NM_004333:exon15:c.1780G>C:p.D594H,BRAF:NM_001374244:exon16:c.1900G>C:p.D634H,BRAF:NM_001374258:exon16:c.1900G>C:p.D634H	-	-	-	-	-	-	-	-	-	-	-	-	-	-	-	-	-	-	-	-	-	-	-	-	-	-	-	-	-	-	-	-	-	-	lung	1
2	80101245	80101245	G	A	exonic	CTNNA2	-	nonsynonymous SNV	CTNNA2:NM_001164883:exon6:c.629G>A:p.R210Q,CTNNA2:NM_001282597:exon6:c.629G>A:p.R210Q,CTNNA2:NM_001282598:exon6:c.731G>A:p.R244Q,CTNNA2:NM_004389:exon6:c.629G>A:p.R210Q	-	-	-	-	-	-	-	-	-	-	-	-	-	-	-	-	-	3.186e-05	0.0001	5.726e-05	0	3.183e-05	0.0001	.	0	0	0	0	0	0	0.0001	.	.	.	lung	2
2	80101245	80101245	G	T	exonic	CTNNA2	-	nonsynonymous SNV	CTNNA2:NM_001164883:exon6:c.629G>T:p.R210L,CTNNA2:NM_001282597:exon6:c.629G>T:p.R210L,CTNNA2:NM_001282598:exon6:c.731G>T:p.R244L,CTNNA2:NM_004389:exon6:c.629G>T:p.R210L	4.01e-06	8.838e-06	7.39e-06	0	3.99e-06	0	0	0	0	8.838e-06	0	0	0	9.003e-06	.	9.788e-06	.	-	-	-	-	-	-	-	-	-	-	-	-	-	-	-	-	-	lung	1
17	7578550	7578550	G	A	exonic	TP53	-	nonsynonymous SNV	TP53:NM_001126118:exon4:c.263C>T:p.S88F,TP53:NM_000546:exon5:c.380C>T:p.S127F,TP53:NM_001126112:exon5:c.380C>T:p.S127F,TP53:NM_001126113:exon5:c.380C>T:p.S127F,TP53:NM_001126114:exon5:c.380C>T:p.S127F,TP53:NM_001276695:exon5:c.263C>T:p.S88F,TP53:NM_001276696:exon5:c.263C>T:p.S88F,TP53:NM_001276760:exon5:c.263C>T:p.S88F,TP53:NM_001276761:exon5:c.263C>T:p.S88F	-	-	-	-	-	-	-	-	-	-	-	-	-	-	-	-	-	-	-	-	-	-	-	-	-	-	-	-	-	-	-	-	-	-	lung	2
17	7578550	7578550	G	C	exonic	TP53	-	nonsynonymous SNV	TP53:NM_001126118:exon4:c.263C>G:p.S88C,TP53:NM_000546:exon5:c.380C>G:p.S127C,TP53:NM_001126112:exon5:c.380C>G:p.S127C,TP53:NM_001126113:exon5:c.380C>G:p.S127C,TP53:NM_001126114:exon5:c.380C>G:p.S127C,TP53:NM_001276695:exon5:c.263C>G:p.S88C,TP53:NM_001276696:exon5:c.263C>G:p.S88C,TP53:NM_001276760:exon5:c.263C>G:p.S88C,TP53:NM_001276761:exon5:c.263C>G:p.S88C	-	-	-	-	-	-	-	-	-	-	-	-	-	-	-	-	-	-	-	-	-	-	-	-	-	-	-	-	-	-	-	-	-	-	lung	1
2	209025587	209025587	C	A	exonic	CRYGA	-	nonsynonymous SNV	CRYGA:NM_014617:exon3:c.466G>T:p.D156Y	5.173e-05	0.0004	1.472e-05	9.526e-05	5.169e-05	0	0	0.0004	0	0	0	0	0	0.0004	0.0004	0.0004	0.0003	-	-	-	-	-	-	-	-	-	-	-	-	-	-	-	-	-	lung	2
2	209025587	209025587	C	G	exonic	CRYGA	-	nonsynonymous SNV	CRYGA:NM_014617:exon3:c.466G>C:p.D156H	-	-	-	-	-	-	-	-	-	-	-	-	-	-	-	-	-	-	-	-	-	-	-	-	-	-	-	-	-	-	-	-	-	-	lung	1
17	7577114	7577114	C	A	exonic	TP53	-	nonsynonymous SNV	TP53:NM_001126115:exon4:c.428G>T:p.C143F,TP53:NM_001126116:exon4:c.428G>T:p.C143F,TP53:NM_001126117:exon4:c.428G>T:p.C143F,TP53:NM_001276697:exon4:c.347G>T:p.C116F,TP53:NM_001276698:exon4:c.347G>T:p.C116F,TP53:NM_001276699:exon4:c.347G>T:p.C116F,TP53:NM_001126118:exon7:c.707G>T:p.C236F,TP53:NM_000546:exon8:c.824G>T:p.C275F,TP53:NM_001126112:exon8:c.824G>T:p.C275F,TP53:NM_001126113:exon8:c.824G>T:…	-	-	-	-	-	-	-	-	-	-	-	-	-	-	-	-	-	-	-	-	-	-	-	-	-	-	-	-	-	-	-	-	-	-	lung	3
1	247587725	247587725	G	C	exonic	NLRP3	-	nonsynonymous SNV	NLRP3:NM_001127462:exon3:c.980G>C:p.R327P,NLRP3:NM_001243133:exon3:c.974G>C:p.R325P,NLRP3:NM_004895:exon3:c.980G>C:p.R327P,NLRP3:NM_183395:exon3:c.980G>C:p.R327P,NLRP3:NM_001127461:exon4:c.980G>C:p.R327P,NLRP3:NM_001079821:exon5:c.980G>C:p.R327P	-	-	-	-	-	-	-	-	-	-	-	-	-	-	-	-	-	-	-	-	-	-	-	-	-	-	-	-	-	-	-	-	-	-	lung	2
1	247587725	247587725	G	T	exonic	NLRP3	-	nonsynonymous SNV	NLRP3:NM_001127462:exon3:c.980G>T:p.R327L,NLRP3:NM_001243133:exon3:c.974G>T:p.R325L,NLRP3:NM_004895:exon3:c.980G>T:p.R327L,NLRP3:NM_183395:exon3:c.980G>T:p.R327L,NLRP3:NM_001127461:exon4:c.980G>T:p.R327L,NLRP3:NM_001079821:exon5:c.980G>T:p.R327L	-	-	-	-	-	-	-	-	-	-	-	-	-	-	-	-	-	-	-	-	-	-	-	-	-	-	-	-	-	-	-	-	-	-	lung	1
15	23811059	23811059	C	G	exonic	MKRN3	-	nonsynonymous SNV	MKRN3:NM_005664:exon1:c.130C>G:p.P44A	-	-	-	-	-	-	-	-	-	-	-	-	-	-	-	-	-	-	-	-	-	-	-	-	-	-	-	-	-	-	-	-	-	-	lung	2
15	23811059	23811059	C	A	exonic	MKRN3	-	nonsynonymous SNV	MKRN3:NM_005664:exon1:c.130C>A:p.P44T	-	-	-	-	-	-	-	-	-	-	-	-	-	-	-	-	-	-	-	-	-	-	-	-	-	-	-	-	-	-	-	-	-	-	lung	1
15	33954739	33954739	C	A	exonic	RYR3	-	nonsynonymous SNV	RYR3:NM_001036:exon35:c.5008C>A:p.P1670T,RYR3:NM_001243996:exon35:c.5008C>A:p.P1670T	-	-	-	-	-	-	-	-	-	-	-	-	-	-	-	-	-	-	-	-	-	-	-	-	-	-	-	-	-	-	-	-	-	-	lung	2
15	33954739	33954739	C	T	exonic	RYR3	-	nonsynonymous SNV	RYR3:NM_001036:exon35:c.5008C>T:p.P1670S,RYR3:NM_001243996:exon35:c.5008C>T:p.P1670S	-	-	-	-	-	-	-	-	-	-	-	-	-	-	-	-	-	-	-	-	-	-	-	-	-	-	-	-	-	-	-	-	-	-	lung	1
2	178098968	178098968	T	C	exonic	NFE2L2	-	nonsynonymous SNV	NFE2L2:NM_001145412:exon2:c.29A>G:p.Q10R,NFE2L2:NM_001145413:exon2:c.29A>G:p.Q10R,NFE2L2:NM_001313900:exon2:c.29A>G:p.Q10R,NFE2L2:NM_001313901:exon2:c.29A>G:p.Q10R,NFE2L2:NM_001313902:exon2:c.77A>G:p.Q26R,NFE2L2:NM_001313903:exon2:c.77A>G:p.Q26R,NFE2L2:NM_006164:exon2:c.77A>G:p.Q26R	-	-	-	-	-	-	-	-	-	-	-	-	-	-	-	-	-	-	-	-	-	-	-	-	-	-	-	-	-	-	-	-	-	-	lung	1
2	178098968	178098968	T	G	exonic	NFE2L2	-	nonsynonymous SNV	NFE2L2:NM_001145412:exon2:c.29A>C:p.Q10P,NFE2L2:NM_001145413:exon2:c.29A>C:p.Q10P,NFE2L2:NM_001313900:exon2:c.29A>C:p.Q10P,NFE2L2:NM_001313901:exon2:c.29A>C:p.Q10P,NFE2L2:NM_001313902:exon2:c.77A>C:p.Q26P,NFE2L2:NM_001313903:exon2:c.77A>C:p.Q26P,NFE2L2:NM_006164:exon2:c.77A>C:p.Q26P	-	-	-	-	-	-	-	-	-	-	-	-	-	-	-	-	-	-	-	-	-	-	-	-	-	-	-	-	-	-	-	-	-	-	lung	1
2	178098968	178098968	T	A	exonic	NFE2L2	-	nonsynonymous SNV	NFE2L2:NM_001145412:exon2:c.29A>T:p.Q10L,NFE2L2:NM_001145413:exon2:c.29A>T:p.Q10L,NFE2L2:NM_001313900:exon2:c.29A>T:p.Q10L,NFE2L2:NM_001313901:exon2:c.29A>T:p.Q10L,NFE2L2:NM_001313902:exon2:c.77A>T:p.Q26L,NFE2L2:NM_001313903:exon2:c.77A>T:p.Q26L,NFE2L2:NM_006164:exon2:c.77A>T:p.Q26L	-	-	-	-	-	-	-	-	-	-	-	-	-	-	-	-	-	-	-	-	-	-	-	-	-	-	-	-	-	-	-	-	-	-	lung	1
17	7577532	7577532	G	A	exonic	TP53	-	nonsynonymous SNV	TP53:NM_001126115:exon3:c.353C>T:p.P118L,TP53:NM_001126116:exon3:c.353C>T:p.P118L,TP53:NM_001126117:exon3:c.353C>T:p.P118L,TP53:NM_001276697:exon3:c.272C>T:p.P91L,TP53:NM_001276698:exon3:c.272C>T:p.P91L,TP53:NM_001276699:exon3:c.272C>T:p.P91L,TP53:NM_001126118:exon6:c.632C>T:p.P211L,TP53:NM_000546:exon7:c.749C>T:p.P250L,TP53:NM_001126112:exon7:c.749C>T:p.P250L,TP53:NM_001126113:exon7:c.749C>T:p.P…	-	-	-	-	-	-	-	-	-	-	-	-	-	-	-	-	-	-	-	-	-	-	-	-	-	-	-	-	-	-	-	-	-	-	lung	3
1	237957224	237957224	G	T	exonic	RYR2	-	nonsynonymous SNV	RYR2:NM_001035:exon95:c.13840G>T:p.G4614W	-	-	-	-	-	-	-	-	-	-	-	-	-	-	-	-	-	-	-	-	-	-	-	-	-	-	-	-	-	-	-	-	-	-	lung	2
1	237957224	237957224	G	A	exonic	RYR2	-	nonsynonymous SNV	RYR2:NM_001035:exon95:c.13840G>A:p.G4614R	-	-	-	-	-	-	-	-	-	-	-	-	-	-	-	-	-	-	-	-	-	-	-	-	-	-	-	-	-	-	-	-	-	-	lung	1
1	74507415	74507415	C	A	exonic	LRRIQ3	-	nonsynonymous SNV	LRRIQ3:NM_001105659:exon7:c.1200G>T:p.L400F,LRRIQ3:NM_001322315:exon7:c.1200G>T:p.L400F	4.018e-06	8.861e-06	7.406e-06	0	8.005e-06	0	0	0	0	8.861e-06	0	0	0	9.028e-06	1.124e-05	9.819e-06	.	-	-	-	-	-	-	-	-	-	-	-	-	-	-	-	-	-	lung	2
1	74507415	74507415	C	G	exonic	LRRIQ3	-	nonsynonymous SNV	LRRIQ3:NM_001105659:exon7:c.1200G>C:p.L400F,LRRIQ3:NM_001322315:exon7:c.1200G>C:p.L400F	-	-	-	-	-	-	-	-	-	-	-	-	-	-	-	-	-	-	-	-	-	-	-	-	-	-	-	-	-	-	-	-	-	-	lung	1
19	10610247	10610247	C	A	exonic	KEAP1	-	nonsynonymous SNV	KEAP1:NM_012289:exon2:c.463G>T:p.V155F,KEAP1:NM_203500:exon2:c.463G>T:p.V155F	-	-	-	-	-	-	-	-	-	-	-	-	-	-	-	-	-	-	-	-	-	-	-	-	-	-	-	-	-	-	-	-	-	-	lung	3
1	248436623	248436623	G	T	exonic	OR2T33	-	nonsynonymous SNV	OR2T33:NM_001004695:exon1:c.494C>A:p.P165Q	-	-	-	-	-	-	-	-	-	-	-	-	-	-	-	-	-	-	-	-	-	-	-	-	-	-	-	-	-	-	-	-	-	-	lung	2
1	248436623	248436623	G	A	exonic	OR2T33	-	nonsynonymous SNV	OR2T33:NM_001004695:exon1:c.494C>T:p.P165L	-	-	-	-	-	-	-	-	-	-	-	-	-	-	-	-	-	-	-	-	-	-	-	-	-	-	-	-	-	-	-	-	-	-	lung	1
11	534286	534286	C	A	exonic	HRAS	-	nonsynonymous SNV	HRAS:NM_001130442:exon2:c.37G>T:p.G13C,HRAS:NM_005343:exon2:c.37G>T:p.G13C,HRAS:NM_176795:exon2:c.37G>T:p.G13C	-	-	-	-	-	-	-	-	-	-	-	-	-	-	-	-	-	-	-	-	-	-	-	-	-	-	-	-	-	-	-	-	-	-	lung	2
11	534286	534286	C	G	exonic	HRAS	-	nonsynonymous SNV	HRAS:NM_001130442:exon2:c.37G>C:p.G13R,HRAS:NM_005343:exon2:c.37G>C:p.G13R,HRAS:NM_176795:exon2:c.37G>C:p.G13R	-	-	-	-	-	-	-	-	-	-	-	-	-	-	-	-	-	-	-	-	-	-	-	-	-	-	-	-	-	-	-	-	-	-	lung	1
8	88885761	88885761	C	A	exonic	DCAF4L2	-	nonsynonymous SNV	DCAF4L2:NM_152418:exon1:c.439G>T:p.V147L	-	-	-	-	-	-	-	-	-	-	-	-	-	-	-	-	-	-	-	-	-	-	-	-	-	-	-	-	-	-	-	-	-	-	lung	3
17	7578467	7578467	T	G	exonic	TP53	-	nonsynonymous SNV	TP53:NM_001126115:exon1:c.67A>C:p.T23P,TP53:NM_001126116:exon1:c.67A>C:p.T23P,TP53:NM_001126117:exon1:c.67A>C:p.T23P,TP53:NM_001126118:exon4:c.346A>C:p.T116P,TP53:NM_000546:exon5:c.463A>C:p.T155P,TP53:NM_001126112:exon5:c.463A>C:p.T155P,TP53:NM_001126113:exon5:c.463A>C:p.T155P,TP53:NM_001126114:exon5:c.463A>C:p.T155P,TP53:NM_001276695:exon5:c.346A>C:p.T116P,TP53:NM_001276696:exon5:c.346A>C:p.T116…	-	-	-	-	-	-	-	-	-	-	-	-	-	-	-	-	-	-	-	-	-	-	-	-	-	-	-	-	-	-	-	-	-	-	lung	3
4	153247289	153247289	G	C	exonic	FBXW7	-	nonsynonymous SNV	FBXW7:NM_001013415:exon9:c.1159C>G:p.R387G,FBXW7:NM_018315:exon9:c.1273C>G:p.R425G,FBXW7:NM_033632:exon10:c.1513C>G:p.R505G,FBXW7:NM_001349798:exon12:c.1513C>G:p.R505G	-	-	-	-	-	-	-	-	-	-	-	-	-	-	-	-	-	-	-	-	-	-	-	-	-	-	-	-	-	-	-	-	-	-	lung	2
4	153247289	153247289	G	T	exonic	FBXW7	-	nonsynonymous SNV	FBXW7:NM_001013415:exon9:c.1159C>A:p.R387S,FBXW7:NM_018315:exon9:c.1273C>A:p.R425S,FBXW7:NM_033632:exon10:c.1513C>A:p.R505S,FBXW7:NM_001349798:exon12:c.1513C>A:p.R505S	-	-	-	-	-	-	-	-	-	-	-	-	-	-	-	-	-	-	-	-	-	-	-	-	-	-	-	-	-	-	-	-	-	-	lung	1
8	139164776	139164776	G	T	exonic	FAM135B	-	nonsynonymous SNV	FAM135B:NM_001362965:exon13:c.1942C>A:p.L648M,FAM135B:NM_015912:exon13:c.1942C>A:p.L648M	-	-	-	-	-	-	-	-	-	-	-	-	-	-	-	-	-	-	-	-	-	-	-	-	-	-	-	-	-	-	-	-	-	-	lung	3
3	178938934	178938934	G	A	exonic	PIK3CA	-	nonsynonymous SNV	PIK3CA:NM_006218:exon14:c.2176G>A:p.E726K	-	-	-	-	-	-	-	-	-	-	-	-	-	-	-	-	-	-	-	-	-	-	-	-	-	-	-	-	-	-	-	-	-	-	lung	3
2	179396364	179396364	G	A	exonic	TTN	-	nonsynonymous SNV	TTN:NM_003319:exon186:c.77783C>T:p.T25928M,TTN:NM_133432:exon187:c.78158C>T:p.T26053M,TTN:NM_133437:exon187:c.78359C>T:p.T26120M,TTN:NM_133378:exon307:c.97274C>T:p.T32425M,TTN:NM_001256850:exon308:c.100055C>T:p.T33352M,TTN:NM_001267550:exon358:c.104978C>T:p.T34993M	5.22e-05	0.0002	5.182e-05	5.266e-05	6.796e-05	6.458e-05	0.0002	0	0	6.204e-05	0	0	0	0.0002	0.0002	0.0002	0.0001	-	-	-	-	-	-	-	-	-	-	-	-	-	-	-	-	-	lung	2
2	179396364	179396364	G	T	exonic	TTN	-	nonsynonymous SNV	TTN:NM_003319:exon186:c.77783C>A:p.T25928K,TTN:NM_133432:exon187:c.78158C>A:p.T26053K,TTN:NM_133437:exon187:c.78359C>A:p.T26120K,TTN:NM_133378:exon307:c.97274C>A:p.T32425K,TTN:NM_001256850:exon308:c.100055C>A:p.T33352K,TTN:NM_001267550:exon358:c.104978C>A:p.T34993K	-	-	-	-	-	-	-	-	-	-	-	-	-	-	-	-	-	-	-	-	-	-	-	-	-	-	-	-	-	-	-	-	-	-	lung	1
12	101442178	101442178	G	C	exonic	ANO4	-	nonsynonymous SNV	ANO4:NM_001286616:exon13:c.1311G>C:p.W437C,ANO4:NM_178826:exon13:c.1206G>C:p.W402C,ANO4:NM_001286615:exon14:c.1311G>C:p.W437C	-	-	-	-	-	-	-	-	-	-	-	-	-	-	-	-	-	-	-	-	-	-	-	-	-	-	-	-	-	-	-	-	-	-	lung	2
12	101442178	101442178	G	T	exonic	ANO4	-	nonsynonymous SNV	ANO4:NM_001286616:exon13:c.1311G>T:p.W437C,ANO4:NM_178826:exon13:c.1206G>T:p.W402C,ANO4:NM_001286615:exon14:c.1311G>T:p.W437C	-	-	-	-	-	-	-	-	-	-	-	-	-	-	-	-	-	-	-	-	-	-	-	-	-	-	-	-	-	-	-	-	-	-	lung	1
16	24373168	24373168	G	C	exonic	CACNG3	-	nonsynonymous SNV	CACNG3:NM_006539:exon4:c.932G>C:p.R311P	-	-	-	-	-	-	-	-	-	-	-	-	-	-	-	-	-	-	-	-	-	-	-	-	-	-	-	-	-	-	-	-	-	-	lung	2
16	24373168	24373168	G	A	exonic	CACNG3	-	nonsynonymous SNV	CACNG3:NM_006539:exon4:c.932G>A:p.R311H	0	.	0	0	1.591e-05	0	0	0	0	0	0	0	0	.	.	.	.	-	-	-	-	-	-	-	-	-	-	-	-	-	-	-	-	-	lung	1
8	88885206	88885206	C	A	exonic	DCAF4L2	-	nonsynonymous SNV	DCAF4L2:NM_152418:exon1:c.994G>T:p.V332L	-	-	-	-	-	-	-	-	-	-	-	-	-	-	-	-	-	-	-	-	-	-	-	-	-	-	-	-	-	-	-	-	-	-	lung	2
8	88885206	88885206	C	T	exonic	DCAF4L2	-	nonsynonymous SNV	DCAF4L2:NM_152418:exon1:c.994G>A:p.V332M	3.979e-06	8.8e-06	0	8.658e-06	3.976e-06	0	0	0	0	8.8e-06	0	0	0	8.965e-06	.	9.745e-06	.	-	-	-	-	-	-	-	-	-	-	-	-	-	-	-	-	-	lung	1
22	41565529	41565529	G	A	exonic	EP300	-	nonsynonymous SNV	EP300:NM_001362843:exon25:c.4117G>A:p.D1373N,EP300:NM_001429:exon26:c.4195G>A:p.D1399N	-	-	-	-	-	-	-	-	-	-	-	-	-	-	-	-	-	-	-	-	-	-	-	-	-	-	-	-	-	-	-	-	-	-	lung	3
16	61859003	61859003	C	A	exonic	CDH8	-	nonsynonymous SNV	CDH8:NM_001796:exon5:c.748G>T:p.G250C	-	-	-	-	-	-	-	-	-	-	-	-	-	-	-	-	-	-	-	-	-	-	-	-	-	-	-	-	-	-	-	-	-	-	lung	3
17	7577127	7577127	C	T	exonic	TP53	-	nonsynonymous SNV	TP53:NM_001126115:exon4:c.415G>A:p.E139K,TP53:NM_001126116:exon4:c.415G>A:p.E139K,TP53:NM_001126117:exon4:c.415G>A:p.E139K,TP53:NM_001276697:exon4:c.334G>A:p.E112K,TP53:NM_001276698:exon4:c.334G>A:p.E112K,TP53:NM_001276699:exon4:c.334G>A:p.E112K,TP53:NM_001126118:exon7:c.694G>A:p.E232K,TP53:NM_000546:exon8:c.811G>A:p.E271K,TP53:NM_001126112:exon8:c.811G>A:p.E271K,TP53:NM_001126113:exon8:c.811G>A:…	-	-	-	-	-	-	-	-	-	-	-	-	-	-	-	-	-	-	-	-	-	-	-	-	-	-	-	-	-	-	-	-	-	-	lung	3
13	92380805	92380805	G	T	exonic	GPC5	-	nonsynonymous SNV	GPC5:NM_004466:exon4:c.1040G>T:p.R347L	-	-	-	-	-	-	-	-	-	-	-	-	-	-	-	-	-	-	-	-	-	-	-	-	-	-	-	-	-	-	-	-	-	-	lung	2
13	92380805	92380805	G	A	exonic	GPC5	-	nonsynonymous SNV	GPC5:NM_004466:exon4:c.1040G>A:p.R347H	0.0001	0.0005	0.0002	7.846e-05	0.0001	0.0004	0.0005	5.857e-05	0.0001	7.072e-05	0	0	0	0.0005	0.0005	0.0005	0.0004	0.0001	0.0002	5.734e-05	0.0002	0.0001	0.0001	.	0	0	0.0002	0	0	0	0.0003	0.0002	.	0.0005	lung	1
1	240072343	240072343	G	T	exonic	CHRM3	-	nonsynonymous SNV	CHRM3:NM_000740:exon5:c.1592G>T:p.W531L,CHRM3:NM_001347716:exon8:c.1592G>T:p.W531L	-	-	-	-	-	-	-	-	-	-	-	-	-	-	-	-	-	-	-	-	-	-	-	-	-	-	-	-	-	-	-	-	-	-	lung	2
1	240072343	240072343	G	C	exonic	CHRM3	-	nonsynonymous SNV	CHRM3:NM_000740:exon5:c.1592G>C:p.W531S,CHRM3:NM_001347716:exon8:c.1592G>C:p.W531S	-	-	-	-	-	-	-	-	-	-	-	-	-	-	-	-	-	-	-	-	-	-	-	-	-	-	-	-	-	-	-	-	-	-	lung	1
11	59943065	59943065	C	G	exonic	MS4A6A	-	nonsynonymous SNV	MS4A6A:NM_001330275:exon5:c.443G>C:p.G148A,MS4A6A:NM_022349:exon5:c.359G>C:p.G120A,MS4A6A:NM_152851:exon5:c.359G>C:p.G120A,MS4A6A:NM_001247999:exon6:c.443G>C:p.G148A,MS4A6A:NM_152852:exon6:c.359G>C:p.G120A	-	-	-	-	-	-	-	-	-	-	-	-	-	-	-	-	-	-	-	-	-	-	-	-	-	-	-	-	-	-	-	-	-	-	lung	2
11	59943065	59943065	C	A	exonic	MS4A6A	-	nonsynonymous SNV	MS4A6A:NM_001330275:exon5:c.443G>T:p.G148V,MS4A6A:NM_022349:exon5:c.359G>T:p.G120V,MS4A6A:NM_152851:exon5:c.359G>T:p.G120V,MS4A6A:NM_001247999:exon6:c.443G>T:p.G148V,MS4A6A:NM_152852:exon6:c.359G>T:p.G120V	-	-	-	-	-	-	-	-	-	-	-	-	-	-	-	-	-	-	-	-	-	-	-	-	-	-	-	-	-	-	-	-	-	-	lung	1
11	5443647	5443647	C	A	exonic	OR51Q1	-	nonsynonymous SNV	OR51Q1:NM_001004757:exon1:c.217C>A:p.L73M	-	-	-	-	-	-	-	-	-	-	-	-	-	-	-	-	-	-	-	-	-	-	-	-	-	-	-	-	-	-	-	-	-	-	lung	3
1	40432551	40432551	G	T	exonic	MFSD2A	-	nonsynonymous SNV	MFSD2A:NM_001287808:exon6:c.406G>T:p.G136C,MFSD2A:NM_001136493:exon8:c.913G>T:p.G305C,MFSD2A:NM_001287809:exon8:c.757G>T:p.G253C,MFSD2A:NM_001349821:exon8:c.868G>T:p.G290C,MFSD2A:NM_001349822:exon8:c.874G>T:p.G292C,MFSD2A:NM_001349823:exon8:c.529G>T:p.G177C,MFSD2A:NM_032793:exon8:c.874G>T:p.G292C	-	-	-	-	-	-	-	-	-	-	-	-	-	-	-	-	-	-	-	-	-	-	-	-	-	-	-	-	-	-	-	-	-	-	lung	2
1	40432551	40432551	G	A	exonic	MFSD2A	-	nonsynonymous SNV	MFSD2A:NM_001287808:exon6:c.406G>A:p.G136S,MFSD2A:NM_001136493:exon8:c.913G>A:p.G305S,MFSD2A:NM_001287809:exon8:c.757G>A:p.G253S,MFSD2A:NM_001349821:exon8:c.868G>A:p.G290S,MFSD2A:NM_001349822:exon8:c.874G>A:p.G292S,MFSD2A:NM_001349823:exon8:c.529G>A:p.G177S,MFSD2A:NM_032793:exon8:c.874G>A:p.G292S	3.186e-05	0.0002	2.21e-05	4.335e-05	3.181e-05	0	0.0002	2.891e-05	0	0	0	0	0	0.0002	0.0002	0.0002	0.0001	-	-	-	-	-	-	-	-	-	-	-	-	-	-	-	-	-	lung	1
5	22078722	22078722	G	T	exonic	CDH12	-	nonsynonymous SNV	CDH12:NM_001317227:exon2:c.64C>A:p.P22T,CDH12:NM_001317228:exon3:c.64C>A:p.P22T,CDH12:NM_001364107:exon3:c.64C>A:p.P22T,CDH12:NM_001364108:exon3:c.64C>A:p.P22T,CDH12:NM_001364104:exon4:c.64C>A:p.P22T,CDH12:NM_001364106:exon5:c.64C>A:p.P22T,CDH12:NM_004061:exon5:c.64C>A:p.P22T,CDH12:NM_001364105:exon6:c.64C>A:p.P22T	-	-	-	-	-	-	-	-	-	-	-	-	-	-	-	-	-	-	-	-	-	-	-	-	-	-	-	-	-	-	-	-	-	-	lung	2
5	22078722	22078722	G	C	exonic	CDH12	-	nonsynonymous SNV	CDH12:NM_001317227:exon2:c.64C>G:p.P22A,CDH12:NM_001317228:exon3:c.64C>G:p.P22A,CDH12:NM_001364107:exon3:c.64C>G:p.P22A,CDH12:NM_001364108:exon3:c.64C>G:p.P22A,CDH12:NM_001364104:exon4:c.64C>G:p.P22A,CDH12:NM_001364106:exon5:c.64C>G:p.P22A,CDH12:NM_004061:exon5:c.64C>G:p.P22A,CDH12:NM_001364105:exon6:c.64C>G:p.P22A	-	-	-	-	-	-	-	-	-	-	-	-	-	-	-	-	-	-	-	-	-	-	-	-	-	-	-	-	-	-	-	-	-	-	lung	1
17	7578280	7578280	G	A	exonic	TP53	-	nonsynonymous SNV	TP53:NM_001126115:exon2:c.173C>T:p.P58L,TP53:NM_001126116:exon2:c.173C>T:p.P58L,TP53:NM_001126117:exon2:c.173C>T:p.P58L,TP53:NM_001276697:exon2:c.92C>T:p.P31L,TP53:NM_001276698:exon2:c.92C>T:p.P31L,TP53:NM_001276699:exon2:c.92C>T:p.P31L,TP53:NM_001126118:exon5:c.452C>T:p.P151L,TP53:NM_000546:exon6:c.569C>T:p.P190L,TP53:NM_001126112:exon6:c.569C>T:p.P190L,TP53:NM_001126113:exon6:c.569C>T:p.P190L,T…	-	-	-	-	-	-	-	-	-	-	-	-	-	-	-	-	-	-	-	-	-	-	-	-	-	-	-	-	-	-	-	-	-	-	lung	3
19	10602619	10602619	C	T	exonic	KEAP1	-	nonsynonymous SNV	KEAP1:NM_012289:exon3:c.959G>A:p.R320Q,KEAP1:NM_203500:exon3:c.959G>A:p.R320Q	-	-	-	-	-	-	-	-	-	-	-	-	-	-	-	-	-	-	-	-	-	-	-	-	-	-	-	-	-	-	-	-	-	-	lung	2
19	10602619	10602619	C	A	exonic	KEAP1	-	nonsynonymous SNV	KEAP1:NM_012289:exon3:c.959G>T:p.R320L,KEAP1:NM_203500:exon3:c.959G>T:p.R320L	0	.	0	0	3.976e-06	0	0	0	0	0	0	0	0	.	.	.	.	-	-	-	-	-	-	-	-	-	-	-	-	-	-	-	-	-	lung	1
2	178098959	178098959	T	C	exonic	NFE2L2	-	nonsynonymous SNV	NFE2L2:NM_001145412:exon2:c.38A>G:p.D13G,NFE2L2:NM_001145413:exon2:c.38A>G:p.D13G,NFE2L2:NM_001313900:exon2:c.38A>G:p.D13G,NFE2L2:NM_001313901:exon2:c.38A>G:p.D13G,NFE2L2:NM_001313902:exon2:c.86A>G:p.D29G,NFE2L2:NM_001313903:exon2:c.86A>G:p.D29G,NFE2L2:NM_006164:exon2:c.86A>G:p.D29G	-	-	-	-	-	-	-	-	-	-	-	-	-	-	-	-	-	-	-	-	-	-	-	-	-	-	-	-	-	-	-	-	-	-	lung	3
1	33237497	33237497	C	T	exonic	KIAA1522	-	nonsynonymous SNV	KIAA1522:NM_001198972:exon6:c.2540C>T:p.S847L,KIAA1522:NM_001369553:exon6:c.2573C>T:p.S858L,KIAA1522:NM_020888:exon6:c.2717C>T:p.S906L	1.419e-05	7.903e-05	1.709e-05	1.059e-05	4.014e-05	7.903e-05	0	0	0	2.155e-05	0	0	0	2.184e-05	7.924e-05	8.559e-05	0.0002	-	-	-	-	-	-	-	-	-	-	-	-	-	-	-	-	-	lung	3
2	79385824	79385824	G	T	exonic	REG3A	-	nonsynonymous SNV	REG3A:NM_138938:exon2:c.148C>A:p.H50N,REG3A:NM_002580:exon3:c.148C>A:p.H50N,REG3A:NM_138937:exon3:c.148C>A:p.H50N	-	-	-	-	-	-	-	-	-	-	-	-	-	-	-	-	-	-	-	-	-	-	-	-	-	-	-	-	-	-	-	-	-	-	lung	1
2	79385824	79385824	G	A	exonic	REG3A	-	nonsynonymous SNV	REG3A:NM_138938:exon2:c.148C>T:p.H50Y,REG3A:NM_002580:exon3:c.148C>T:p.H50Y,REG3A:NM_138937:exon3:c.148C>T:p.H50Y	-	-	-	-	-	-	-	-	-	-	-	-	-	-	-	-	-	-	-	-	-	-	-	-	-	-	-	-	-	-	-	-	-	-	lung	1
2	79385824	79385824	G	C	exonic	REG3A	-	nonsynonymous SNV	REG3A:NM_138938:exon2:c.148C>G:p.H50D,REG3A:NM_002580:exon3:c.148C>G:p.H50D,REG3A:NM_138937:exon3:c.148C>G:p.H50D	0	.	0	0	3.976e-06	0	0	0	0	0	0	0	0	.	.	.	.	-	-	-	-	-	-	-	-	-	-	-	-	-	-	-	-	-	lung	1
10	106974319	106974319	G	T	exonic	SORCS3	-	nonsynonymous SNV	SORCS3:NM_014978:exon18:c.2495G>T:p.R832L	-	-	-	-	-	-	-	-	-	-	-	-	-	-	-	-	-	-	-	-	-	-	-	-	-	-	-	-	-	-	-	-	-	-	lung	3
4	164534479	164534479	G	T	exonic	MARCHF1	-	nonsynonymous SNV	MARCHF1:NM_017923:exon1:c.178C>A:p.Q60K,MARCHF1:NM_001166373:exon5:c.229C>A:p.Q77K	-	-	-	-	-	-	-	-	-	-	-	-	-	-	-	-	-	-	-	-	-	-	-	-	-	-	-	-	-	-	-	-	-	-	lung	2
4	164534479	164534479	G	C	exonic	MARCHF1	-	nonsynonymous SNV	MARCHF1:NM_017923:exon1:c.178C>G:p.Q60E,MARCHF1:NM_001166373:exon5:c.229C>G:p.Q77E	-	-	-	-	-	-	-	-	-	-	-	-	-	-	-	-	-	-	-	-	-	-	-	-	-	-	-	-	-	-	-	-	-	-	lung	1
9	21971107	21971107	T	C	exonic	CDKN2A	-	nonsynonymous SNV	CDKN2A:NM_000077:exon2:c.251A>G:p.D84G,CDKN2A:NM_001195132:exon2:c.251A>G:p.D84G,CDKN2A:NM_001363763:exon2:c.98A>G:p.D33G	-	-	-	-	-	-	-	-	-	-	-	-	-	-	-	-	-	-	-	-	-	-	-	-	-	-	-	-	-	-	-	-	-	-	lung	2
9	21971107	21971107	T	A	exonic	CDKN2A	-	nonsynonymous SNV	CDKN2A:NM_000077:exon2:c.251A>T:p.D84V,CDKN2A:NM_001195132:exon2:c.251A>T:p.D84V,CDKN2A:NM_001363763:exon2:c.98A>T:p.D33V	-	-	-	-	-	-	-	-	-	-	-	-	-	-	-	-	-	-	-	-	-	-	-	-	-	-	-	-	-	-	-	-	-	-	lung	1
10	89692902	89692902	G	A	exonic	PTEN	-	nonsynonymous SNV	PTEN:NM_000314:exon5:c.386G>A:p.G129E,PTEN:NM_001304717:exon6:c.905G>A:p.G302E	-	-	-	-	-	-	-	-	-	-	-	-	-	-	-	-	-	-	-	-	-	-	-	-	-	-	-	-	-	-	-	-	-	-	lung	3
19	10599915	10599915	C	T	exonic	KEAP1	-	nonsynonymous SNV	KEAP1:NM_012289:exon5:c.1661G>A:p.R554Q,KEAP1:NM_203500:exon5:c.1661G>A:p.R554Q	-	-	-	-	-	-	-	-	-	-	-	-	-	-	-	-	-	-	-	-	-	-	-	-	-	-	-	-	-	-	-	-	-	-	lung	3
6	26252107	26252107	G	A	exonic	H2BC9	-	nonsynonymous SNV	H2BC9:NM_003524:exon1:c.229G>A:p.E77K	-	-	-	-	-	-	-	-	-	-	-	-	-	-	-	-	-	-	-	-	-	-	-	-	-	-	-	-	-	-	-	-	-	-	lung	3
1	248262995	248262995	G	T	exonic	OR2L13	-	nonsynonymous SNV	OR2L13:NM_001304535:exon2:c.318G>T:p.M106I,OR2L13:NM_175911:exon3:c.318G>T:p.M106I	-	-	-	-	-	-	-	-	-	-	-	-	-	-	-	-	-	-	-	-	-	-	-	-	-	-	-	-	-	-	-	-	-	-	lung	3
12	78511901	78511901	G	T	exonic	NAV3	-	nonsynonymous SNV	NAV3:NM_001024383:exon14:c.2864G>T:p.G955V,NAV3:NM_014903:exon14:c.2864G>T:p.G955V	-	-	-	-	-	-	-	-	-	-	-	-	-	-	-	-	-	-	-	-	-	-	-	-	-	-	-	-	-	-	-	-	-	-	lung	2
12	78511901	78511901	G	C	exonic	NAV3	-	nonsynonymous SNV	NAV3:NM_001024383:exon14:c.2864G>C:p.G955A,NAV3:NM_014903:exon14:c.2864G>C:p.G955A	-	-	-	-	-	-	-	-	-	-	-	-	-	-	-	-	-	-	-	-	-	-	-	-	-	-	-	-	-	-	-	-	-	-	lung	1
8	113697836	113697836	G	C	exonic	CSMD3	-	nonsynonymous SNV	CSMD3:NM_001363185:exon13:c.1891C>G:p.L631V,CSMD3:NM_052900:exon14:c.1969C>G:p.L657V,CSMD3:NM_198123:exon15:c.2281C>G:p.L761V,CSMD3:NM_198124:exon16:c.2161C>G:p.L721V	-	-	-	-	-	-	-	-	-	-	-	-	-	-	-	-	-	-	-	-	-	-	-	-	-	-	-	-	-	-	-	-	-	-	lung	2
8	113697836	113697836	G	T	exonic	CSMD3	-	nonsynonymous SNV	CSMD3:NM_001363185:exon13:c.1891C>A:p.L631I,CSMD3:NM_052900:exon14:c.1969C>A:p.L657I,CSMD3:NM_198123:exon15:c.2281C>A:p.L761I,CSMD3:NM_198124:exon16:c.2161C>A:p.L721I	-	-	-	-	-	-	-	-	-	-	-	-	-	-	-	-	-	-	-	-	-	-	-	-	-	-	-	-	-	-	-	-	-	-	lung	1
12	99640640	99640640	C	A	exonic	ANKS1B	-	nonsynonymous SNV	ANKS1B:NM_001352185:exon13:c.1759G>T:p.D587Y,ANKS1B:NM_001352186:exon13:c.1759G>T:p.D587Y,ANKS1B:NM_001352187:exon13:c.1759G>T:p.D587Y,ANKS1B:NM_001352188:exon13:c.1759G>T:p.D587Y,ANKS1B:NM_152788:exon13:c.1759G>T:p.D587Y	4.877e-06	1.017e-05	8.944e-06	0	2.403e-05	0	0	0	0	1.017e-05	0	0	0	1.035e-05	1.327e-05	1.138e-05	.	-	-	-	-	-	-	-	-	-	-	-	-	-	-	-	-	-	lung	3
7	140453193	140453193	T	C	exonic	BRAF	-	nonsynonymous SNV	BRAF:NM_001354609:exon15:c.1742A>G:p.N581S,BRAF:NM_004333:exon15:c.1742A>G:p.N581S,BRAF:NM_001374244:exon16:c.1862A>G:p.N621S,BRAF:NM_001374258:exon16:c.1862A>G:p.N621S	-	-	-	-	-	-	-	-	-	-	-	-	-	-	-	-	-	-	-	-	-	-	-	-	-	-	-	-	-	-	-	-	-	-	lung	3
1	158627389	158627389	G	T	exonic	SPTA1	-	nonsynonymous SNV	SPTA1:NM_003126:exon19:c.2683C>A:p.L895I	-	-	-	-	-	-	-	-	-	-	-	-	-	-	-	-	-	-	-	-	-	-	-	-	-	-	-	-	-	-	-	-	-	-	lung	3
7	55249005	55249005	G	T	exonic	EGFR	-	nonsynonymous SNV	EGFR:NM_001346941:exon14:c.1502G>T:p.S501I,EGFR:NM_001346897:exon19:c.2168G>T:p.S723I,EGFR:NM_001346899:exon19:c.2168G>T:p.S723I,EGFR:NM_001346898:exon20:c.2303G>T:p.S768I,EGFR:NM_001346900:exon20:c.2144G>T:p.S715I,EGFR:NM_005228:exon20:c.2303G>T:p.S768I	-	-	-	-	-	-	-	-	-	-	-	-	-	-	-	-	-	-	-	-	-	-	-	-	-	-	-	-	-	-	-	-	-	-	lung	3
14	90651010	90651010	G	T	exonic	KCNK13	-	nonsynonymous SNV	KCNK13:NM_022054:exon2:c.890G>T:p.G297V	-	-	-	-	-	-	-	-	-	-	-	-	-	-	-	-	-	-	-	-	-	-	-	-	-	-	-	-	-	-	-	-	-	-	lung	3
1	175066810	175066810	G	T	exonic	TNN	-	nonsynonymous SNV	TNN:NM_022093:exon8:c.1846G>T:p.A616S	-	-	-	-	-	-	-	-	-	-	-	-	-	-	-	-	-	-	-	-	-	-	-	-	-	-	-	-	-	-	-	-	-	-	lung	3
12	25398262	25398262	C	G	exonic	KRAS	-	nonsynonymous SNV	KRAS:NM_001369786:exon2:c.57G>C:p.L19F,KRAS:NM_001369787:exon2:c.57G>C:p.L19F,KRAS:NM_004985:exon2:c.57G>C:p.L19F,KRAS:NM_033360:exon2:c.57G>C:p.L19F	0	.	0	0	3.976e-06	0	0	0	0	0	0	0	0	.	.	.	.	-	-	-	-	-	-	-	-	-	-	-	-	-	-	-	-	-	lung	2
12	25398262	25398262	C	A	exonic	KRAS	-	nonsynonymous SNV	KRAS:NM_001369786:exon2:c.57G>T:p.L19F,KRAS:NM_001369787:exon2:c.57G>T:p.L19F,KRAS:NM_004985:exon2:c.57G>T:p.L19F,KRAS:NM_033360:exon2:c.57G>T:p.L19F	-	-	-	-	-	-	-	-	-	-	-	-	-	-	-	-	-	-	-	-	-	-	-	-	-	-	-	-	-	-	-	-	-	-	lung	1
5	45303823	45303823	C	A	exonic	HCN1	-	nonsynonymous SNV	HCN1:NM_021072:exon6:c.1496G>T:p.G499V	-	-	-	-	-	-	-	-	-	-	-	-	-	-	-	-	-	-	-	-	-	-	-	-	-	-	-	-	-	-	-	-	-	-	lung	2
5	45303823	45303823	C	G	exonic	HCN1	-	nonsynonymous SNV	HCN1:NM_021072:exon6:c.1496G>C:p.G499A	-	-	-	-	-	-	-	-	-	-	-	-	-	-	-	-	-	-	-	-	-	-	-	-	-	-	-	-	-	-	-	-	-	-	lung	1
1	240371509	240371509	C	A	exonic	FMN2	-	nonsynonymous SNV	FMN2:NM_020066:exon5:c.3397C>A:p.P1133T,FMN2:NM_001305424:exon6:c.3409C>A:p.P1137T	-	-	-	-	-	-	-	-	-	-	-	-	-	-	-	-	-	-	-	-	-	-	-	-	-	-	-	-	-	-	-	-	-	-	lung	2
1	240371509	240371509	C	T	exonic	FMN2	-	nonsynonymous SNV	FMN2:NM_020066:exon5:c.3397C>T:p.P1133S,FMN2:NM_001305424:exon6:c.3409C>T:p.P1137S	-	-	-	-	-	-	-	-	-	-	-	-	-	-	-	-	-	-	-	-	-	-	-	-	-	-	-	-	-	-	-	-	-	-	lung	1
10	37482124	37482124	G	T	exonic	ANKRD30A	-	nonsynonymous SNV	ANKRD30A:NM_052997:exon27:c.2384G>T:p.R795I	0	.	0	0	4.009e-06	0	0	0	0	0	0	0	0	.	.	.	.	-	-	-	-	-	-	-	-	-	-	-	-	-	-	-	-	-	lung	2
10	37482124	37482124	G	C	exonic	ANKRD30A	-	nonsynonymous SNV	ANKRD30A:NM_052997:exon27:c.2384G>C:p.R795T	-	-	-	-	-	-	-	-	-	-	-	-	-	-	-	-	-	-	-	-	-	-	-	-	-	-	-	-	-	-	-	-	-	-	lung	1
5	21755753	21755753	C	T	exonic	CDH12	-	nonsynonymous SNV	CDH12:NM_001364109:exon9:c.1160G>A:p.G387E,CDH12:NM_001317227:exon11:c.1832G>A:p.G611E,CDH12:NM_001317228:exon11:c.1712G>A:p.G571E,CDH12:NM_001364107:exon12:c.1832G>A:p.G611E,CDH12:NM_001364108:exon12:c.1832G>A:p.G611E,CDH12:NM_001364104:exon13:c.1832G>A:p.G611E,CDH12:NM_001364106:exon14:c.1832G>A:p.G611E,CDH12:NM_004061:exon14:c.1832G>A:p.G611E,CDH12:NM_001364105:exon15:c.1832G>A:p.G611E	-	-	-	-	-	-	-	-	-	-	-	-	-	-	-	-	-	-	-	-	-	-	-	-	-	-	-	-	-	-	-	-	-	-	lung	2
5	21755753	21755753	C	G	exonic	CDH12	-	nonsynonymous SNV	CDH12:NM_001364109:exon9:c.1160G>C:p.G387A,CDH12:NM_001317227:exon11:c.1832G>C:p.G611A,CDH12:NM_001317228:exon11:c.1712G>C:p.G571A,CDH12:NM_001364107:exon12:c.1832G>C:p.G611A,CDH12:NM_001364108:exon12:c.1832G>C:p.G611A,CDH12:NM_001364104:exon13:c.1832G>C:p.G611A,CDH12:NM_001364106:exon14:c.1832G>C:p.G611A,CDH12:NM_004061:exon14:c.1832G>C:p.G611A,CDH12:NM_001364105:exon15:c.1832G>C:p.G611A	-	-	-	-	-	-	-	-	-	-	-	-	-	-	-	-	-	-	-	-	-	-	-	-	-	-	-	-	-	-	-	-	-	-	lung	1
5	45396782	45396782	C	T	exonic	HCN1	-	nonsynonymous SNV	HCN1:NM_021072:exon4:c.1042G>A:p.A348T	-	-	-	-	-	-	-	-	-	-	-	-	-	-	-	-	-	-	-	-	-	-	-	-	-	-	-	-	-	-	-	-	-	-	lung	1
5	45396782	45396782	C	G	exonic	HCN1	-	nonsynonymous SNV	HCN1:NM_021072:exon4:c.1042G>C:p.A348P	-	-	-	-	-	-	-	-	-	-	-	-	-	-	-	-	-	-	-	-	-	-	-	-	-	-	-	-	-	-	-	-	-	-	lung	1
5	45396782	45396782	C	A	exonic	HCN1	-	nonsynonymous SNV	HCN1:NM_021072:exon4:c.1042G>T:p.A348S	-	-	-	-	-	-	-	-	-	-	-	-	-	-	-	-	-	-	-	-	-	-	-	-	-	-	-	-	-	-	-	-	-	-	lung	1
11	72145270	72145270	G	C	exonic	CLPB	-	nonsynonymous SNV	CLPB:NM_001258394:exon1:c.7C>G:p.R3G	-	-	-	-	-	-	-	-	-	-	-	-	-	-	-	-	-	-	-	-	-	-	-	-	-	-	-	-	-	-	-	-	-	-	lung	2
11	72145270	72145270	G	A	exonic	CLPB	-	nonsynonymous SNV	CLPB:NM_001258394:exon1:c.7C>T:p.R3C	2.802e-05	6.201e-05	2.215e-05	3.499e-05	2.784e-05	0	0	0	0	6.201e-05	0	0	0	6.306e-05	7.885e-05	5.868e-05	2.339e-05	3.189e-05	0.0001	5.727e-05	0	3.183e-05	0.0001	.	0	0	0	0	0	0	0.0001	.	.	.	lung	1
7	142564021	142564021	G	T	exonic	EPHB6	-	nonsynonymous SNV	EPHB6:NM_001280795:exon5:c.533G>T:p.S178I,EPHB6:NM_001280794:exon8:c.533G>T:p.S178I,EPHB6:NM_004445:exon9:c.1409G>T:p.S470I	0	.	0	0	3.977e-06	0	0	0	0	0	0	0	0	.	.	.	.	-	-	-	-	-	-	-	-	-	-	-	-	-	-	-	-	-	lung	2
7	142564021	142564021	G	C	exonic	EPHB6	-	nonsynonymous SNV	EPHB6:NM_001280795:exon5:c.533G>C:p.S178T,EPHB6:NM_001280794:exon8:c.533G>C:p.S178T,EPHB6:NM_004445:exon9:c.1409G>C:p.S470T	1.205e-05	8.682e-05	1.484e-05	8.763e-06	1.193e-05	0	0	8.682e-05	0	0	0	0	0	8.715e-05	9.839e-05	8.766e-05	5.851e-05	-	-	-	-	-	-	-	-	-	-	-	-	-	-	-	-	-	lung	1
17	7574018	7574018	G	A	exonic	TP53	-	nonsynonymous SNV	TP53:NM_001126115:exon6:c.613C>T:p.R205C,TP53:NM_001276697:exon6:c.532C>T:p.R178C,TP53:NM_001126118:exon9:c.892C>T:p.R298C,TP53:NM_000546:exon10:c.1009C>T:p.R337C,TP53:NM_001126112:exon10:c.1009C>T:p.R337C,TP53:NM_001276760:exon10:c.892C>T:p.R298C,TP53:NM_001276761:exon10:c.892C>T:p.R298C	0	.	0	0	7.953e-06	0	0	0	0	0	0	0	0	.	.	.	.	-	-	-	-	-	-	-	-	-	-	-	-	-	-	-	-	-	lung	3
14	20295971	20295971	C	A	exonic	OR4N2	-	nonsynonymous SNV	OR4N2:NM_001004723:exon2:c.364C>A:p.R122S	2.386e-05	5.275e-05	3.679e-05	8.654e-06	2.386e-05	0	0	0	0	5.275e-05	0	0	0	5.373e-05	5.583e-05	4.867e-05	2.338e-05	9.552e-05	0.0002	5.721e-05	0.0001	9.549e-05	0.0002	.	0	0	6.48e-05	0	0	0	0.0002	7.341e-05	.	.	lung	3
11	99715950	99715950	C	A	exonic	CNTN5	-	nonsynonymous SNV	CNTN5:NM_175566:exon3:c.311C>A:p.T104N,CNTN5:NM_001243270:exon5:c.533C>A:p.T178N,CNTN5:NM_001243271:exon6:c.533C>A:p.T178N,CNTN5:NM_014361:exon6:c.533C>A:p.T178N	-	-	-	-	-	-	-	-	-	-	-	-	-	-	-	-	-	-	-	-	-	-	-	-	-	-	-	-	-	-	-	-	-	-	lung	2
11	99715950	99715950	C	T	exonic	CNTN5	-	nonsynonymous SNV	CNTN5:NM_175566:exon3:c.311C>T:p.T104I,CNTN5:NM_001243270:exon5:c.533C>T:p.T178I,CNTN5:NM_001243271:exon6:c.533C>T:p.T178I,CNTN5:NM_014361:exon6:c.533C>T:p.T178I	-	-	-	-	-	-	-	-	-	-	-	-	-	-	-	-	-	-	-	-	-	-	-	-	-	-	-	-	-	-	-	-	-	-	lung	1
11	51515322	51515322	G	T	exonic	OR4C46	-	nonsynonymous SNV	OR4C46:NM_001004703:exon1:c.41G>T:p.G14V	-	-	-	-	-	-	-	-	-	-	-	-	-	-	-	-	-	-	-	-	-	-	-	-	-	-	-	-	-	-	-	-	-	-	lung	2
11	51515322	51515322	G	A	exonic	OR4C46	-	nonsynonymous SNV	OR4C46:NM_001004703:exon1:c.41G>A:p.G14E	-	-	-	-	-	-	-	-	-	-	-	-	-	-	-	-	-	-	-	-	-	-	-	-	-	-	-	-	-	-	-	-	-	-	lung	1
19	10602328	10602328	C	A	exonic	KEAP1	-	nonsynonymous SNV	KEAP1:NM_012289:exon3:c.1250G>T:p.G417V,KEAP1:NM_203500:exon3:c.1250G>T:p.G417V	-	-	-	-	-	-	-	-	-	-	-	-	-	-	-	-	-	-	-	-	-	-	-	-	-	-	-	-	-	-	-	-	-	-	lung	2
19	10602328	10602328	C	T	exonic	KEAP1	-	nonsynonymous SNV	KEAP1:NM_012289:exon3:c.1250G>A:p.G417E,KEAP1:NM_203500:exon3:c.1250G>A:p.G417E	-	-	-	-	-	-	-	-	-	-	-	-	-	-	-	-	-	-	-	-	-	-	-	-	-	-	-	-	-	-	-	-	-	-	lung	1
11	62521022	62521022	G	C	exonic	ZBTB3	-	nonsynonymous SNV	ZBTB3:NM_001363108:exon2:c.115C>G:p.R39G,ZBTB3:NM_001363109:exon2:c.115C>G:p.R39G,ZBTB3:NM_001370809:exon2:c.115C>G:p.R39G	-	-	-	-	-	-	-	-	-	-	-	-	-	-	-	-	-	-	-	-	-	-	-	-	-	-	-	-	-	-	-	-	-	-	lung	2
11	62521022	62521022	G	A	exonic	ZBTB3	-	nonsynonymous SNV	ZBTB3:NM_001363108:exon2:c.115C>T:p.R39W,ZBTB3:NM_001363109:exon2:c.115C>T:p.R39W,ZBTB3:NM_001370809:exon2:c.115C>T:p.R39W	-	-	-	-	-	-	-	-	-	-	-	-	-	-	-	-	-	-	-	-	-	-	-	-	-	-	-	-	-	-	-	-	-	-	lung	1
20	57484421	57484421	G	A	exonic	GNAS	-	nonsynonymous SNV	GNAS:NM_001077489:exon7:c.557G>A:p.R186H,GNAS:NM_080426:exon7:c.560G>A:p.R187H,GNAS:NM_000516:exon8:c.602G>A:p.R201H,GNAS:NM_001077488:exon8:c.605G>A:p.R202H,GNAS:NM_001309840:exon8:c.425G>A:p.R142H,GNAS:NM_001309861:exon8:c.425G>A:p.R142H,GNAS:NM_080425:exon8:c.2531G>A:p.R844H	1.591e-05	2.891e-05	2.943e-05	0	7.157e-05	0	0	2.891e-05	0	1.758e-05	0	9.923e-05	0	2.902e-05	3.277e-05	2.919e-05	.	-	-	-	-	-	-	-	-	-	-	-	-	-	-	-	-	-	lung	3
10	38344866	38344866	G	T	exonic	ZNF33A	-	nonsynonymous SNV	ZNF33A:NM_001278170:exon4:c.1832G>T:p.G611V,ZNF33A:NM_001324178:exon4:c.1835G>T:p.G612V,ZNF33A:NM_001278177:exon5:c.1877G>T:p.G626V,ZNF33A:NM_001278178:exon5:c.1478G>T:p.G493V,ZNF33A:NM_001324176:exon5:c.1478G>T:p.G493V,ZNF33A:NM_006954:exon5:c.1814G>T:p.G605V,ZNF33A:NM_006974:exon5:c.1811G>T:p.G604V,ZNF33A:NM_001278171:exon6:c.1478G>T:p.G493V,ZNF33A:NM_001278173:exon6:c.1868G>T:p.G623V,ZNF33A:NM…	-	-	-	-	-	-	-	-	-	-	-	-	-	-	-	-	-	-	-	-	-	-	-	-	-	-	-	-	-	-	-	-	-	-	lung	2
10	38344866	38344866	G	A	exonic	ZNF33A	-	nonsynonymous SNV	ZNF33A:NM_001278170:exon4:c.1832G>A:p.G611E,ZNF33A:NM_001324178:exon4:c.1835G>A:p.G612E,ZNF33A:NM_001278177:exon5:c.1877G>A:p.G626E,ZNF33A:NM_001278178:exon5:c.1478G>A:p.G493E,ZNF33A:NM_001324176:exon5:c.1478G>A:p.G493E,ZNF33A:NM_006954:exon5:c.1814G>A:p.G605E,ZNF33A:NM_006974:exon5:c.1811G>A:p.G604E,ZNF33A:NM_001278171:exon6:c.1478G>A:p.G493E,ZNF33A:NM_001278173:exon6:c.1868G>A:p.G623E,ZNF33A:NM…	-	-	-	-	-	-	-	-	-	-	-	-	-	-	-	-	-	-	-	-	-	-	-	-	-	-	-	-	-	-	-	-	-	-	lung	1
13	97485168	97485168	C	G	exonic	HS6ST3	-	nonsynonymous SNV	HS6ST3:NM_153456:exon2:c.1132C>G:p.Q378E	-	-	-	-	-	-	-	-	-	-	-	-	-	-	-	-	-	-	-	-	-	-	-	-	-	-	-	-	-	-	-	-	-	-	lung	2
13	97485168	97485168	C	A	exonic	HS6ST3	-	nonsynonymous SNV	HS6ST3:NM_153456:exon2:c.1132C>A:p.Q378K	-	-	-	-	-	-	-	-	-	-	-	-	-	-	-	-	-	-	-	-	-	-	-	-	-	-	-	-	-	-	-	-	-	-	lung	1
11	49208318	49208318	C	A	exonic	FOLH1	-	nonsynonymous SNV	FOLH1:NM_001014986:exon5:c.517G>T:p.D173Y,FOLH1:NM_004476:exon5:c.517G>T:p.D173Y,FOLH1:NM_001193471:exon6:c.472G>T:p.D158Y,FOLH1:NM_001193472:exon6:c.472G>T:p.D158Y,FOLH1:NM_001351236:exon6:c.346G>T:p.D116Y	8.352e-06	1.803e-05	1.546e-05	0	1.193e-05	0	0	0	0	1.803e-05	0	0	0	1.836e-05	1.148e-05	2.002e-05	2.376e-05	-	-	-	-	-	-	-	-	-	-	-	-	-	-	-	-	-	lung	3
5	140744136	140744136	G	A	exonic	PCDHGA5	-	nonsynonymous SNV	PCDHGA5:NM_018918:exon1:c.239G>A:p.R80Q,PCDHGA5:NM_032054:exon1:c.239G>A:p.R80Q	-	-	-	-	-	-	-	-	-	-	-	-	-	-	-	-	-	-	-	-	-	-	-	-	-	-	-	-	-	-	-	-	-	-	lung	2
5	140744136	140744136	G	C	exonic	PCDHGA5	-	nonsynonymous SNV	PCDHGA5:NM_018918:exon1:c.239G>C:p.R80P,PCDHGA5:NM_032054:exon1:c.239G>C:p.R80P	-	-	-	-	-	-	-	-	-	-	-	-	-	-	-	-	-	-	-	-	-	-	-	-	-	-	-	-	-	-	-	-	-	-	lung	1
7	88963284	88963284	C	T	exonic	ZNF804B	-	nonsynonymous SNV	ZNF804B:NM_181646:exon4:c.988C>T:p.H330Y	-	-	-	-	-	-	-	-	-	-	-	-	-	-	-	-	-	-	-	-	-	-	-	-	-	-	-	-	-	-	-	-	-	-	lung	2
7	88963284	88963284	C	G	exonic	ZNF804B	-	nonsynonymous SNV	ZNF804B:NM_181646:exon4:c.988C>G:p.H330D	-	-	-	-	-	-	-	-	-	-	-	-	-	-	-	-	-	-	-	-	-	-	-	-	-	-	-	-	-	-	-	-	-	-	lung	1
1	248570265	248570265	C	A	exonic	OR2T1	-	nonsynonymous SNV	OR2T1:NM_030904:exon1:c.970C>A:p.L324I	-	-	-	-	-	-	-	-	-	-	-	-	-	-	-	-	-	-	-	-	-	-	-	-	-	-	-	-	-	-	-	-	-	-	lung	2
1	248570265	248570265	C	T	exonic	OR2T1	-	nonsynonymous SNV	OR2T1:NM_030904:exon1:c.970C>T:p.L324F	-	-	-	-	-	-	-	-	-	-	-	-	-	-	-	-	-	-	-	-	-	-	-	-	-	-	-	-	-	-	-	-	-	-	lung	1
21	10920092	10920092	G	T	exonic	TPTE	-	nonsynonymous SNV	TPTE:NM_001290224:exon14:c.748C>A:p.P250T,TPTE:NM_199260:exon17:c.1048C>A:p.P350T,TPTE:NM_199259:exon18:c.1108C>A:p.P370T,TPTE:NM_199261:exon19:c.1162C>A:p.P388T	3.984e-06	3.267e-05	0	8.673e-06	3.979e-06	0	3.267e-05	0	0	0	0	0	0	3.267e-05	3.268e-05	3.276e-05	.	-	-	-	-	-	-	-	-	-	-	-	-	-	-	-	-	-	lung	2
21	10920092	10920092	G	C	exonic	TPTE	-	nonsynonymous SNV	TPTE:NM_001290224:exon14:c.748C>G:p.P250A,TPTE:NM_199260:exon17:c.1048C>G:p.P350A,TPTE:NM_199259:exon18:c.1108C>G:p.P370A,TPTE:NM_199261:exon19:c.1162C>G:p.P388A	-	-	-	-	-	-	-	-	-	-	-	-	-	-	-	-	-	-	-	-	-	-	-	-	-	-	-	-	-	-	-	-	-	-	lung	1
15	45003745	45003745	A	G	exonic	B2M	-	startloss	B2M:NM_004048:exon1:c.1A>G:p.M1?	0	.	0	0	3.976e-06	0	0	0	0	0	0	0	0	.	.	.	.	-	-	-	-	-	-	-	-	-	-	-	-	-	-	-	-	-	lung	3
4	1803568	1803568	C	G	exonic	FGFR3	-	nonsynonymous SNV	FGFR3:NM_000142:exon7:c.746C>G:p.S249C,FGFR3:NM_001163213:exon7:c.746C>G:p.S249C,FGFR3:NM_001354809:exon7:c.746C>G:p.S249C,FGFR3:NM_001354810:exon7:c.746C>G:p.S249C,FGFR3:NM_022965:exon7:c.746C>G:p.S249C	0	.	0	0	7.977e-06	0	0	0	0	0	0	0	0	.	.	.	.	-	-	-	-	-	-	-	-	-	-	-	-	-	-	-	-	-	lung	3
11	66360198	66360198	C	T	exonic	CCDC87	-	nonsynonymous SNV	CCDC87:NM_018219:exon1:c.289G>A:p.E97K	3.992e-06	3.267e-05	7.373e-06	0	7.953e-06	0	3.267e-05	0	0	0	0	0	0	3.267e-05	3.268e-05	3.276e-05	6.374e-05	-	-	-	-	-	-	-	-	-	-	-	-	-	-	-	-	-	lung	3
1	75677224	75677224	C	A	exonic	SLC44A5	-	nonsynonymous SNV	SLC44A5:NM_001320283:exon21:c.1958G>T:p.G653V,SLC44A5:NM_001130058:exon23:c.1976G>T:p.G659V,SLC44A5:NM_152697:exon23:c.1976G>T:p.G659V,SLC44A5:NM_001320287:exon24:c.1850G>T:p.G617V,SLC44A5:NM_001320285:exon25:c.1850G>T:p.G617V	0	.	0	0	3.976e-06	0	0	0	0	0	0	0	0	.	.	.	.	-	-	-	-	-	-	-	-	-	-	-	-	-	-	-	-	-	lung	3
16	76461394	76461394	C	A	exonic	CNTNAP4	-	nonsynonymous SNV	CNTNAP4:NM_001322180:exon3:c.49C>A:p.L17I,CNTNAP4:NM_138994:exon4:c.361C>A:p.L121I,CNTNAP4:NM_001322189:exon5:c.172C>A:p.L58I	-	-	-	-	-	-	-	-	-	-	-	-	-	-	-	-	-	-	-	-	-	-	-	-	-	-	-	-	-	-	-	-	-	-	lung	2
16	76461394	76461394	C	G	exonic	CNTNAP4	-	nonsynonymous SNV	CNTNAP4:NM_001322180:exon3:c.49C>G:p.L17V,CNTNAP4:NM_138994:exon4:c.361C>G:p.L121V,CNTNAP4:NM_001322189:exon5:c.172C>G:p.L58V	-	-	-	-	-	-	-	-	-	-	-	-	-	-	-	-	-	-	-	-	-	-	-	-	-	-	-	-	-	-	-	-	-	-	lung	1
17	7576853	7576853	C	A	exonic	TP53	-	nonsynonymous SNV	TP53:NM_001126115:exon5:c.597G>T:p.Q199H,TP53:NM_001126116:exon5:c.597G>T:p.Q199H,TP53:NM_001126117:exon5:c.597G>T:p.Q199H,TP53:NM_001276697:exon5:c.516G>T:p.Q172H,TP53:NM_001276698:exon5:c.516G>T:p.Q172H,TP53:NM_001276699:exon5:c.516G>T:p.Q172H,TP53:NM_001126118:exon8:c.876G>T:p.Q292H,TP53:NM_000546:exon9:c.993G>T:p.Q331H,TP53:NM_001126112:exon9:c.993G>T:p.Q331H,TP53:NM_001126113:exon9:c.993G>T:…	-	-	-	-	-	-	-	-	-	-	-	-	-	-	-	-	-	-	-	-	-	-	-	-	-	-	-	-	-	-	-	-	-	-	lung	2
17	7576853	7576853	C	G	exonic	TP53	-	nonsynonymous SNV	TP53:NM_001126115:exon5:c.597G>C:p.Q199H,TP53:NM_001126116:exon5:c.597G>C:p.Q199H,TP53:NM_001126117:exon5:c.597G>C:p.Q199H,TP53:NM_001276697:exon5:c.516G>C:p.Q172H,TP53:NM_001276698:exon5:c.516G>C:p.Q172H,TP53:NM_001276699:exon5:c.516G>C:p.Q172H,TP53:NM_001126118:exon8:c.876G>C:p.Q292H,TP53:NM_000546:exon9:c.993G>C:p.Q331H,TP53:NM_001126112:exon9:c.993G>C:p.Q331H,TP53:NM_001126113:exon9:c.993G>C:…	-	-	-	-	-	-	-	-	-	-	-	-	-	-	-	-	-	-	-	-	-	-	-	-	-	-	-	-	-	-	-	-	-	-	lung	1
8	116632234	116632234	C	A	exonic	TRPS1	-	nonsynonymous SNV	TRPS1:NM_001282902:exon2:c.64G>T:p.G22C,TRPS1:NM_001330599:exon2:c.52G>T:p.G18C,TRPS1:NM_001282903:exon3:c.70G>T:p.G24C,TRPS1:NM_014112:exon3:c.91G>T:p.G31C	-	-	-	-	-	-	-	-	-	-	-	-	-	-	-	-	-	-	-	-	-	-	-	-	-	-	-	-	-	-	-	-	-	-	lung	2
8	116632234	116632234	C	G	exonic	TRPS1	-	nonsynonymous SNV	TRPS1:NM_001282902:exon2:c.64G>C:p.G22R,TRPS1:NM_001330599:exon2:c.52G>C:p.G18R,TRPS1:NM_001282903:exon3:c.70G>C:p.G24R,TRPS1:NM_014112:exon3:c.91G>C:p.G31R	-	-	-	-	-	-	-	-	-	-	-	-	-	-	-	-	-	-	-	-	-	-	-	-	-	-	-	-	-	-	-	-	-	-	lung	1
17	7577105	7577105	G	C	exonic	TP53	-	nonsynonymous SNV	TP53:NM_001126115:exon4:c.437C>G:p.P146R,TP53:NM_001126116:exon4:c.437C>G:p.P146R,TP53:NM_001126117:exon4:c.437C>G:p.P146R,TP53:NM_001276697:exon4:c.356C>G:p.P119R,TP53:NM_001276698:exon4:c.356C>G:p.P119R,TP53:NM_001276699:exon4:c.356C>G:p.P119R,TP53:NM_001126118:exon7:c.716C>G:p.P239R,TP53:NM_000546:exon8:c.833C>G:p.P278R,TP53:NM_001126112:exon8:c.833C>G:p.P278R,TP53:NM_001126113:exon8:c.833C>G:…	-	-	-	-	-	-	-	-	-	-	-	-	-	-	-	-	-	-	-	-	-	-	-	-	-	-	-	-	-	-	-	-	-	-	lung	2
17	7577105	7577105	G	T	exonic	TP53	-	nonsynonymous SNV	TP53:NM_001126115:exon4:c.437C>A:p.P146H,TP53:NM_001126116:exon4:c.437C>A:p.P146H,TP53:NM_001126117:exon4:c.437C>A:p.P146H,TP53:NM_001276697:exon4:c.356C>A:p.P119H,TP53:NM_001276698:exon4:c.356C>A:p.P119H,TP53:NM_001276699:exon4:c.356C>A:p.P119H,TP53:NM_001126118:exon7:c.716C>A:p.P239H,TP53:NM_000546:exon8:c.833C>A:p.P278H,TP53:NM_001126112:exon8:c.833C>A:p.P278H,TP53:NM_001126113:exon8:c.833C>A:…	-	-	-	-	-	-	-	-	-	-	-	-	-	-	-	-	-	-	-	-	-	-	-	-	-	-	-	-	-	-	-	-	-	-	lung	1
3	49412884	49412884	C	T	exonic	RHOA	-	nonsynonymous SNV	RHOA:NM_001313943:exon2:c.139G>A:p.E47K,RHOA:NM_001313946:exon2:c.139G>A:p.E47K,RHOA:NM_001313947:exon2:c.139G>A:p.E47K,RHOA:NM_001664:exon2:c.139G>A:p.E47K,RHOA:NM_001313941:exon3:c.139G>A:p.E47K	-	-	-	-	-	-	-	-	-	-	-	-	-	-	-	-	-	-	-	-	-	-	-	-	-	-	-	-	-	-	-	-	-	-	lung	3
20	62221554	62221554	G	A	exonic	GMEB2	-	nonsynonymous SNV	GMEB2:NM_012384:exon10:c.1481C>T:p.S494L	1.244e-05	3.322e-05	1.516e-05	9.149e-06	1.194e-05	0	3.322e-05	2.944e-05	0	9.155e-06	0	0	0	3.322e-05	3.336e-05	3.332e-05	6.473e-05	3.186e-05	6.483e-05	5.726e-05	0	3.183e-05	0	.	0	0	6.483e-05	0	0	0	9.024e-05	7.345e-05	.	0.0002	lung	3
2	39281778	39281778	T	A	exonic	SOS1	-	nonsynonymous SNV	SOS1:NM_005633:exon5:c.697A>T:p.N233Y	-	-	-	-	-	-	-	-	-	-	-	-	-	-	-	-	-	-	-	-	-	-	-	-	-	-	-	-	-	-	-	-	-	-	lung	3
17	7578475	7578475	G	A	exonic	TP53	-	nonsynonymous SNV	TP53:NM_001126115:exon1:c.59C>T:p.P20L,TP53:NM_001126116:exon1:c.59C>T:p.P20L,TP53:NM_001126117:exon1:c.59C>T:p.P20L,TP53:NM_001126118:exon4:c.338C>T:p.P113L,TP53:NM_000546:exon5:c.455C>T:p.P152L,TP53:NM_001126112:exon5:c.455C>T:p.P152L,TP53:NM_001126113:exon5:c.455C>T:p.P152L,TP53:NM_001126114:exon5:c.455C>T:p.P152L,TP53:NM_001276695:exon5:c.338C>T:p.P113L,TP53:NM_001276696:exon5:c.338C>T:p.P113…	7.959e-06	8.803e-06	0	1.732e-05	1.988e-05	0	0	0	0	8.803e-06	0	9.929e-05	0	8.967e-06	1.118e-05	.	.	-	-	-	-	-	-	-	-	-	-	-	-	-	-	-	-	-	lung	3
12	25398284	25398284	C	T	exonic	KRAS	-	nonsynonymous SNV	KRAS:NM_001369786:exon2:c.35G>A:p.G12D,KRAS:NM_001369787:exon2:c.35G>A:p.G12D,KRAS:NM_004985:exon2:c.35G>A:p.G12D,KRAS:NM_033360:exon2:c.35G>A:p.G12D	4.011e-06	8.883e-06	0	8.726e-06	1.988e-05	0	0	0	0	8.883e-06	0	0	0	9.051e-06	1.127e-05	9.832e-06	2.369e-05	-	-	-	-	-	-	-	-	-	-	-	-	-	-	-	-	-	endometrium	31
12	25398284	25398284	C	A	exonic	KRAS	-	nonsynonymous SNV	KRAS:NM_001369786:exon2:c.35G>T:p.G12V,KRAS:NM_001369787:exon2:c.35G>T:p.G12V,KRAS:NM_004985:exon2:c.35G>T:p.G12V,KRAS:NM_033360:exon2:c.35G>T:p.G12V	0	.	0	0	3.976e-06	0	0	0	0	0	0	0	0	.	.	.	.	-	-	-	-	-	-	-	-	-	-	-	-	-	-	-	-	-	endometrium	19
12	25398284	25398284	C	G	exonic	KRAS	-	nonsynonymous SNV	KRAS:NM_001369786:exon2:c.35G>C:p.G12A,KRAS:NM_001369787:exon2:c.35G>C:p.G12A,KRAS:NM_004985:exon2:c.35G>C:p.G12A,KRAS:NM_033360:exon2:c.35G>C:p.G12A	0	.	0	0	3.976e-06	0	0	0	0	0	0	0	0	.	.	.	.	-	-	-	-	-	-	-	-	-	-	-	-	-	-	-	-	-	endometrium	7
10	89692904	89692904	C	G	exonic	PTEN	-	nonsynonymous SNV	PTEN:NM_000314:exon5:c.388C>G:p.R130G,PTEN:NM_001304717:exon6:c.907C>G:p.R303G	-	-	-	-	-	-	-	-	-	-	-	-	-	-	-	-	-	-	-	-	-	-	-	-	-	-	-	-	-	-	-	-	-	-	endometrium	40
3	178952085	178952085	A	G	exonic	PIK3CA	-	nonsynonymous SNV	PIK3CA:NM_006218:exon21:c.3140A>G:p.H1047R	4.028e-06	8.91e-06	0	8.802e-06	3.998e-06	0	0	0	0	8.91e-06	0	0	0	9.079e-06	1.123e-05	.	.	-	-	-	-	-	-	-	-	-	-	-	-	-	-	-	-	-	endometrium	27
3	178952085	178952085	A	T	exonic	PIK3CA	-	nonsynonymous SNV	PIK3CA:NM_006218:exon21:c.3140A>T:p.H1047L	4.028e-06	8.91e-06	0	8.802e-06	3.998e-06	0	0	0	0	8.91e-06	0	0	0	9.079e-06	1.123e-05	.	.	-	-	-	-	-	-	-	-	-	-	-	-	-	-	-	-	-	endometrium	8
3	41266101	41266101	C	T	exonic	CTNNB1	-	nonsynonymous SNV	CTNNB1:NM_001098209:exon3:c.98C>T:p.S33F,CTNNB1:NM_001098210:exon3:c.98C>T:p.S33F,CTNNB1:NM_001904:exon3:c.98C>T:p.S33F,CTNNB1:NM_001330729:exon4:c.77C>T:p.S26F	-	-	-	-	-	-	-	-	-	-	-	-	-	-	-	-	-	-	-	-	-	-	-	-	-	-	-	-	-	-	-	-	-	-	endometrium	9
3	41266101	41266101	C	G	exonic	CTNNB1	-	nonsynonymous SNV	CTNNB1:NM_001098209:exon3:c.98C>G:p.S33C,CTNNB1:NM_001098210:exon3:c.98C>G:p.S33C,CTNNB1:NM_001904:exon3:c.98C>G:p.S33C,CTNNB1:NM_001330729:exon4:c.77C>G:p.S26C	-	-	-	-	-	-	-	-	-	-	-	-	-	-	-	-	-	-	-	-	-	-	-	-	-	-	-	-	-	-	-	-	-	-	endometrium	9
3	41266101	41266101	C	A	exonic	CTNNB1	-	nonsynonymous SNV	CTNNB1:NM_001098209:exon3:c.98C>A:p.S33Y,CTNNB1:NM_001098210:exon3:c.98C>A:p.S33Y,CTNNB1:NM_001904:exon3:c.98C>A:p.S33Y,CTNNB1:NM_001330729:exon4:c.77C>A:p.S26Y	-	-	-	-	-	-	-	-	-	-	-	-	-	-	-	-	-	-	-	-	-	-	-	-	-	-	-	-	-	-	-	-	-	-	endometrium	6
10	123279677	123279677	G	C	exonic	FGFR2	-	nonsynonymous SNV	FGFR2:NM_001144916:exon4:c.410C>G:p.S137W,FGFR2:NM_001144918:exon5:c.410C>G:p.S137W,FGFR2:NM_023029:exon5:c.488C>G:p.S163W,FGFR2:NM_001144913:exon6:c.755C>G:p.S252W,FGFR2:NM_001144915:exon6:c.488C>G:p.S163W,FGFR2:NM_001144919:exon6:c.488C>G:p.S163W,FGFR2:NM_001320654:exon6:c.71C>G:p.S24W,FGFR2:NM_000141:exon7:c.755C>G:p.S252W,FGFR2:NM_001144917:exon7:c.755C>G:p.S252W,FGFR2:NM_001320658:exon7:c.75…	4.002e-06	6.191e-05	0	8.713e-06	3.976e-06	6.191e-05	0	0	0	0	0	0	0	8.35e-05	6.206e-05	.	.	-	-	-	-	-	-	-	-	-	-	-	-	-	-	-	-	-	endometrium	23
19	52715971	52715971	C	G	exonic	PPP2R1A	-	nonsynonymous SNV	PPP2R1A:NM_014225:exon5:c.536C>G:p.P179R	-	-	-	-	-	-	-	-	-	-	-	-	-	-	-	-	-	-	-	-	-	-	-	-	-	-	-	-	-	-	-	-	-	-	endometrium	19
19	52715971	52715971	C	T	exonic	PPP2R1A	-	nonsynonymous SNV	PPP2R1A:NM_014225:exon5:c.536C>T:p.P179L	-	-	-	-	-	-	-	-	-	-	-	-	-	-	-	-	-	-	-	-	-	-	-	-	-	-	-	-	-	-	-	-	-	-	endometrium	1
10	89692905	89692905	G	A	exonic	PTEN	-	nonsynonymous SNV	PTEN:NM_000314:exon5:c.389G>A:p.R130Q,PTEN:NM_001304717:exon6:c.908G>A:p.R303Q	-	-	-	-	-	-	-	-	-	-	-	-	-	-	-	-	-	-	-	-	-	-	-	-	-	-	-	-	-	-	-	-	-	-	endometrium	15
10	89692905	89692905	G	T	exonic	PTEN	-	nonsynonymous SNV	PTEN:NM_000314:exon5:c.389G>T:p.R130L,PTEN:NM_001304717:exon6:c.908G>T:p.R303L	-	-	-	-	-	-	-	-	-	-	-	-	-	-	-	-	-	-	-	-	-	-	-	-	-	-	-	-	-	-	-	-	-	-	endometrium	3
10	89692905	89692905	G	C	exonic	PTEN	-	nonsynonymous SNV	PTEN:NM_000314:exon5:c.389G>C:p.R130P,PTEN:NM_001304717:exon6:c.908G>C:p.R303P	-	-	-	-	-	-	-	-	-	-	-	-	-	-	-	-	-	-	-	-	-	-	-	-	-	-	-	-	-	-	-	-	-	-	endometrium	2
3	178916876	178916876	G	A	exonic	PIK3CA	-	nonsynonymous SNV	PIK3CA:NM_006218:exon2:c.263G>A:p.R88Q	-	-	-	-	-	-	-	-	-	-	-	-	-	-	-	-	-	-	-	-	-	-	-	-	-	-	-	-	-	-	-	-	-	-	endometrium	20
3	41266113	41266113	C	T	exonic	CTNNB1	-	nonsynonymous SNV	CTNNB1:NM_001098209:exon3:c.110C>T:p.S37F,CTNNB1:NM_001098210:exon3:c.110C>T:p.S37F,CTNNB1:NM_001904:exon3:c.110C>T:p.S37F,CTNNB1:NM_001330729:exon4:c.89C>T:p.S30F	-	-	-	-	-	-	-	-	-	-	-	-	-	-	-	-	-	-	-	-	-	-	-	-	-	-	-	-	-	-	-	-	-	-	endometrium	10
3	41266113	41266113	C	G	exonic	CTNNB1	-	nonsynonymous SNV	CTNNB1:NM_001098209:exon3:c.110C>G:p.S37C,CTNNB1:NM_001098210:exon3:c.110C>G:p.S37C,CTNNB1:NM_001904:exon3:c.110C>G:p.S37C,CTNNB1:NM_001330729:exon4:c.89C>G:p.S30C	-	-	-	-	-	-	-	-	-	-	-	-	-	-	-	-	-	-	-	-	-	-	-	-	-	-	-	-	-	-	-	-	-	-	endometrium	9
3	178936082	178936082	G	A	exonic	PIK3CA	-	nonsynonymous SNV	PIK3CA:NM_006218:exon10:c.1624G>A:p.E542K	-	-	-	-	-	-	-	-	-	-	-	-	-	-	-	-	-	-	-	-	-	-	-	-	-	-	-	-	-	-	-	-	-	-	endometrium	16
3	178936082	178936082	G	C	exonic	PIK3CA	-	nonsynonymous SNV	PIK3CA:NM_006218:exon10:c.1624G>C:p.E542Q	-	-	-	-	-	-	-	-	-	-	-	-	-	-	-	-	-	-	-	-	-	-	-	-	-	-	-	-	-	-	-	-	-	-	endometrium	2
3	178936091	178936091	G	A	exonic	PIK3CA	-	nonsynonymous SNV	PIK3CA:NM_006218:exon10:c.1633G>A:p.E545K	4.032e-06	8.879e-06	0	8.821e-06	4.004e-06	0	0	0	0	8.879e-06	0	0	0	9.045e-06	1.127e-05	.	.	-	-	-	-	-	-	-	-	-	-	-	-	-	-	-	-	-	endometrium	15
3	178936091	178936091	G	C	exonic	PIK3CA	-	nonsynonymous SNV	PIK3CA:NM_006218:exon10:c.1633G>C:p.E545Q	-	-	-	-	-	-	-	-	-	-	-	-	-	-	-	-	-	-	-	-	-	-	-	-	-	-	-	-	-	-	-	-	-	-	endometrium	1
17	7577120	7577120	C	T	exonic	TP53	-	nonsynonymous SNV	TP53:NM_001126115:exon4:c.422G>A:p.R141H,TP53:NM_001126116:exon4:c.422G>A:p.R141H,TP53:NM_001126117:exon4:c.422G>A:p.R141H,TP53:NM_001276697:exon4:c.341G>A:p.R114H,TP53:NM_001276698:exon4:c.341G>A:p.R114H,TP53:NM_001276699:exon4:c.341G>A:p.R114H,TP53:NM_001126118:exon7:c.701G>A:p.R234H,TP53:NM_000546:exon8:c.818G>A:p.R273H,TP53:NM_001126112:exon8:c.818G>A:p.R273H,TP53:NM_001126113:exon8:c.818G>A:…	1.593e-05	2.643e-05	2.21e-05	8.671e-06	3.976e-05	0	0	0	0	2.643e-05	0	9.929e-05	0	2.692e-05	3.355e-05	2.925e-05	7.024e-05	-	-	-	-	-	-	-	-	-	-	-	-	-	-	-	-	-	endometrium	11
17	7577120	7577120	C	A	exonic	TP53	-	nonsynonymous SNV	TP53:NM_001126115:exon4:c.422G>T:p.R141L,TP53:NM_001126116:exon4:c.422G>T:p.R141L,TP53:NM_001126117:exon4:c.422G>T:p.R141L,TP53:NM_001276697:exon4:c.341G>T:p.R114L,TP53:NM_001276698:exon4:c.341G>T:p.R114L,TP53:NM_001276699:exon4:c.341G>T:p.R114L,TP53:NM_001126118:exon7:c.701G>T:p.R234L,TP53:NM_000546:exon8:c.818G>T:p.R273L,TP53:NM_001126112:exon8:c.818G>T:p.R273L,TP53:NM_001126113:exon8:c.818G>T:…	3.983e-06	8.809e-06	7.368e-06	0	3.976e-06	0	0	0	0	8.809e-06	0	0	0	8.974e-06	1.118e-05	.	.	-	-	-	-	-	-	-	-	-	-	-	-	-	-	-	-	-	endometrium	1
3	41266097	41266097	G	T	exonic	CTNNB1	-	nonsynonymous SNV	CTNNB1:NM_001098209:exon3:c.94G>T:p.D32Y,CTNNB1:NM_001098210:exon3:c.94G>T:p.D32Y,CTNNB1:NM_001904:exon3:c.94G>T:p.D32Y,CTNNB1:NM_001330729:exon4:c.73G>T:p.D25Y	-	-	-	-	-	-	-	-	-	-	-	-	-	-	-	-	-	-	-	-	-	-	-	-	-	-	-	-	-	-	-	-	-	-	endometrium	5
3	41266097	41266097	G	A	exonic	CTNNB1	-	nonsynonymous SNV	CTNNB1:NM_001098209:exon3:c.94G>A:p.D32N,CTNNB1:NM_001098210:exon3:c.94G>A:p.D32N,CTNNB1:NM_001904:exon3:c.94G>A:p.D32N,CTNNB1:NM_001330729:exon4:c.73G>A:p.D25N	-	-	-	-	-	-	-	-	-	-	-	-	-	-	-	-	-	-	-	-	-	-	-	-	-	-	-	-	-	-	-	-	-	-	endometrium	5
3	41266097	41266097	G	C	exonic	CTNNB1	-	nonsynonymous SNV	CTNNB1:NM_001098209:exon3:c.94G>C:p.D32H,CTNNB1:NM_001098210:exon3:c.94G>C:p.D32H,CTNNB1:NM_001904:exon3:c.94G>C:p.D32H,CTNNB1:NM_001330729:exon4:c.73G>C:p.D25H	-	-	-	-	-	-	-	-	-	-	-	-	-	-	-	-	-	-	-	-	-	-	-	-	-	-	-	-	-	-	-	-	-	-	endometrium	1
3	178936095	178936095	A	C	exonic	PIK3CA	-	nonsynonymous SNV	PIK3CA:NM_006218:exon10:c.1637A>C:p.Q546P	-	-	-	-	-	-	-	-	-	-	-	-	-	-	-	-	-	-	-	-	-	-	-	-	-	-	-	-	-	-	-	-	-	-	endometrium	6
3	178936095	178936095	A	G	exonic	PIK3CA	-	nonsynonymous SNV	PIK3CA:NM_006218:exon10:c.1637A>G:p.Q546R	-	-	-	-	-	-	-	-	-	-	-	-	-	-	-	-	-	-	-	-	-	-	-	-	-	-	-	-	-	-	-	-	-	-	endometrium	5
17	7577121	7577121	G	A	exonic	TP53	-	nonsynonymous SNV	TP53:NM_001126115:exon4:c.421C>T:p.R141C,TP53:NM_001126116:exon4:c.421C>T:p.R141C,TP53:NM_001126117:exon4:c.421C>T:p.R141C,TP53:NM_001276697:exon4:c.340C>T:p.R114C,TP53:NM_001276698:exon4:c.340C>T:p.R114C,TP53:NM_001276699:exon4:c.340C>T:p.R114C,TP53:NM_001126118:exon7:c.700C>T:p.R234C,TP53:NM_000546:exon8:c.817C>T:p.R273C,TP53:NM_001126112:exon8:c.817C>T:p.R273C,TP53:NM_001126113:exon8:c.817C>T:…	1.196e-05	5.443e-05	1.475e-05	8.679e-06	1.193e-05	0	0	0	5.443e-05	8.818e-06	4.631e-05	0	0	5.444e-05	7.459e-05	5.658e-05	.	0	.	0	0	3.183e-05	0	.	0	0	0	0	0	0	.	.	.	.	endometrium	9
17	7577121	7577121	G	T	exonic	TP53	-	nonsynonymous SNV	TP53:NM_001126115:exon4:c.421C>A:p.R141S,TP53:NM_001126116:exon4:c.421C>A:p.R141S,TP53:NM_001126117:exon4:c.421C>A:p.R141S,TP53:NM_001276697:exon4:c.340C>A:p.R114S,TP53:NM_001276698:exon4:c.340C>A:p.R114S,TP53:NM_001276699:exon4:c.340C>A:p.R114S,TP53:NM_001126118:exon7:c.700C>A:p.R234S,TP53:NM_000546:exon8:c.817C>A:p.R273S,TP53:NM_001126112:exon8:c.817C>A:p.R273S,TP53:NM_001126113:exon8:c.817C>A:…	0	.	0	0	7.952e-06	0	0	0	0	0	0	0	0	.	.	.	.	-	-	-	-	-	-	-	-	-	-	-	-	-	-	-	-	-	endometrium	1
17	7577538	7577538	C	T	exonic	TP53	-	nonsynonymous SNV	TP53:NM_001126115:exon3:c.347G>A:p.R116Q,TP53:NM_001126116:exon3:c.347G>A:p.R116Q,TP53:NM_001126117:exon3:c.347G>A:p.R116Q,TP53:NM_001276697:exon3:c.266G>A:p.R89Q,TP53:NM_001276698:exon3:c.266G>A:p.R89Q,TP53:NM_001276699:exon3:c.266G>A:p.R89Q,TP53:NM_001126118:exon6:c.626G>A:p.R209Q,TP53:NM_000546:exon7:c.743G>A:p.R248Q,TP53:NM_001126112:exon7:c.743G>A:p.R248Q,TP53:NM_001126113:exon7:c.743G>A:p.R…	1.193e-05	2.637e-05	7.358e-06	1.731e-05	2.386e-05	0	0	0	0	2.637e-05	0	0	0	2.687e-05	2.233e-05	1.947e-05	2.338e-05	-	-	-	-	-	-	-	-	-	-	-	-	-	-	-	-	-	endometrium	10
8	55372518	55372518	G	T	exonic	SOX17	-	nonsynonymous SNV	SOX17:NM_022454:exon2:c.1208G>T:p.S403I	-	-	-	-	-	-	-	-	-	-	-	-	-	-	-	-	-	-	-	-	-	-	-	-	-	-	-	-	-	-	-	-	-	-	endometrium	10
12	25398281	25398281	C	T	exonic	KRAS	-	nonsynonymous SNV	KRAS:NM_001369786:exon2:c.38G>A:p.G13D,KRAS:NM_001369787:exon2:c.38G>A:p.G13D,KRAS:NM_004985:exon2:c.38G>A:p.G13D,KRAS:NM_033360:exon2:c.38G>A:p.G13D	0	.	0	0	3.976e-06	0	0	0	0	0	0	0	0	.	.	.	.	-	-	-	-	-	-	-	-	-	-	-	-	-	-	-	-	-	endometrium	8
12	25398281	25398281	C	A	exonic	KRAS	-	nonsynonymous SNV	KRAS:NM_001369786:exon2:c.38G>T:p.G13V,KRAS:NM_001369787:exon2:c.38G>T:p.G13V,KRAS:NM_004985:exon2:c.38G>T:p.G13V,KRAS:NM_033360:exon2:c.38G>T:p.G13V	-	-	-	-	-	-	-	-	-	-	-	-	-	-	-	-	-	-	-	-	-	-	-	-	-	-	-	-	-	-	-	-	-	-	endometrium	1
3	178917478	178917478	G	A	exonic	PIK3CA	-	nonsynonymous SNV	PIK3CA:NM_006218:exon3:c.353G>A:p.G118D	-	-	-	-	-	-	-	-	-	-	-	-	-	-	-	-	-	-	-	-	-	-	-	-	-	-	-	-	-	-	-	-	-	-	endometrium	9
4	153249384	153249384	C	T	exonic	FBXW7	-	nonsynonymous SNV	FBXW7:NM_001013415:exon8:c.1040G>A:p.R347H,FBXW7:NM_018315:exon8:c.1154G>A:p.R385H,FBXW7:NM_033632:exon9:c.1394G>A:p.R465H,FBXW7:NM_001349798:exon11:c.1394G>A:p.R465H	0	.	0	0	1.591e-05	0	0	0	0	0	0	0	0	.	.	.	.	-	-	-	-	-	-	-	-	-	-	-	-	-	-	-	-	-	endometrium	8
4	153249384	153249384	C	A	exonic	FBXW7	-	nonsynonymous SNV	FBXW7:NM_001013415:exon8:c.1040G>T:p.R347L,FBXW7:NM_018315:exon8:c.1154G>T:p.R385L,FBXW7:NM_033632:exon9:c.1394G>T:p.R465L,FBXW7:NM_001349798:exon11:c.1394G>T:p.R465L	-	-	-	-	-	-	-	-	-	-	-	-	-	-	-	-	-	-	-	-	-	-	-	-	-	-	-	-	-	-	-	-	-	-	endometrium	1
3	41266104	41266104	G	A	exonic	CTNNB1	-	nonsynonymous SNV	CTNNB1:NM_001098209:exon3:c.101G>A:p.G34E,CTNNB1:NM_001098210:exon3:c.101G>A:p.G34E,CTNNB1:NM_001904:exon3:c.101G>A:p.G34E,CTNNB1:NM_001330729:exon4:c.80G>A:p.G27E	3.982e-06	6.155e-05	0	8.666e-06	3.976e-06	6.155e-05	0	0	0	0	0	0	0	8.319e-05	6.169e-05	.	.	-	-	-	-	-	-	-	-	-	-	-	-	-	-	-	-	-	endometrium	5
3	41266104	41266104	G	T	exonic	CTNNB1	-	nonsynonymous SNV	CTNNB1:NM_001098209:exon3:c.101G>T:p.G34V,CTNNB1:NM_001098210:exon3:c.101G>T:p.G34V,CTNNB1:NM_001904:exon3:c.101G>T:p.G34V,CTNNB1:NM_001330729:exon4:c.80G>T:p.G27V	-	-	-	-	-	-	-	-	-	-	-	-	-	-	-	-	-	-	-	-	-	-	-	-	-	-	-	-	-	-	-	-	-	-	endometrium	4
19	52716323	52716323	C	T	exonic	PPP2R1A	-	nonsynonymous SNV	PPP2R1A:NM_001363656:exon6:c.230C>T:p.S77F,PPP2R1A:NM_014225:exon6:c.767C>T:p.S256F	-	-	-	-	-	-	-	-	-	-	-	-	-	-	-	-	-	-	-	-	-	-	-	-	-	-	-	-	-	-	-	-	-	-	endometrium	6
19	52716323	52716323	C	A	exonic	PPP2R1A	-	nonsynonymous SNV	PPP2R1A:NM_001363656:exon6:c.230C>A:p.S77Y,PPP2R1A:NM_014225:exon6:c.767C>A:p.S256Y	-	-	-	-	-	-	-	-	-	-	-	-	-	-	-	-	-	-	-	-	-	-	-	-	-	-	-	-	-	-	-	-	-	-	endometrium	3
4	153247289	153247289	G	A	exonic	FBXW7	-	nonsynonymous SNV	FBXW7:NM_001013415:exon9:c.1159C>T:p.R387C,FBXW7:NM_018315:exon9:c.1273C>T:p.R425C,FBXW7:NM_033632:exon10:c.1513C>T:p.R505C,FBXW7:NM_001349798:exon12:c.1513C>T:p.R505C	0	.	0	0	3.976e-06	0	0	0	0	0	0	0	0	.	.	.	.	-	-	-	-	-	-	-	-	-	-	-	-	-	-	-	-	-	endometrium	6
4	153247289	153247289	G	C	exonic	FBXW7	-	nonsynonymous SNV	FBXW7:NM_001013415:exon9:c.1159C>G:p.R387G,FBXW7:NM_018315:exon9:c.1273C>G:p.R425G,FBXW7:NM_033632:exon10:c.1513C>G:p.R505G,FBXW7:NM_001349798:exon12:c.1513C>G:p.R505G	-	-	-	-	-	-	-	-	-	-	-	-	-	-	-	-	-	-	-	-	-	-	-	-	-	-	-	-	-	-	-	-	-	-	endometrium	2
3	178916936	178916936	G	A	exonic	PIK3CA	-	nonsynonymous SNV	PIK3CA:NM_006218:exon2:c.323G>A:p.R108H	-	-	-	-	-	-	-	-	-	-	-	-	-	-	-	-	-	-	-	-	-	-	-	-	-	-	-	-	-	-	-	-	-	-	endometrium	8
14	105246551	105246551	C	T	exonic	AKT1	-	nonsynonymous SNV	AKT1:NM_001014431:exon3:c.49G>A:p.E17K,AKT1:NM_005163:exon3:c.49G>A:p.E17K,AKT1:NM_001014432:exon4:c.49G>A:p.E17K	4e-06	8.872e-06	0	8.729e-06	3.977e-06	0	0	0	0	8.872e-06	0	0	0	9.039e-06	1.128e-05	.	.	-	-	-	-	-	-	-	-	-	-	-	-	-	-	-	-	-	endometrium	8
3	178927980	178927980	T	C	exonic	PIK3CA	-	nonsynonymous SNV	PIK3CA:NM_006218:exon8:c.1258T>C:p.C420R	-	-	-	-	-	-	-	-	-	-	-	-	-	-	-	-	-	-	-	-	-	-	-	-	-	-	-	-	-	-	-	-	-	-	endometrium	8
17	47696599	47696599	T	C	exonic	SPOP	-	nonsynonymous SNV	SPOP:NM_001007228:exon4:c.349A>G:p.M117V,SPOP:NM_001370731:exon4:c.349A>G:p.M117V,SPOP:NM_001370732:exon4:c.349A>G:p.M117V,SPOP:NM_001007227:exon5:c.349A>G:p.M117V,SPOP:NM_001007229:exon5:c.349A>G:p.M117V,SPOP:NM_001370730:exon5:c.349A>G:p.M117V,SPOP:NM_003563:exon5:c.349A>G:p.M117V,SPOP:NM_001007226:exon6:c.349A>G:p.M117V,SPOP:NM_001007230:exon6:c.349A>G:p.M117V	-	-	-	-	-	-	-	-	-	-	-	-	-	-	-	-	-	-	-	-	-	-	-	-	-	-	-	-	-	-	-	-	-	-	endometrium	8
3	41266125	41266125	C	T	exonic	CTNNB1	-	nonsynonymous SNV	CTNNB1:NM_001098209:exon3:c.122C>T:p.T41I,CTNNB1:NM_001098210:exon3:c.122C>T:p.T41I,CTNNB1:NM_001904:exon3:c.122C>T:p.T41I,CTNNB1:NM_001330729:exon4:c.101C>T:p.T34I	-	-	-	-	-	-	-	-	-	-	-	-	-	-	-	-	-	-	-	-	-	-	-	-	-	-	-	-	-	-	-	-	-	-	endometrium	7
3	41266103	41266103	G	A	exonic	CTNNB1	-	nonsynonymous SNV	CTNNB1:NM_001098209:exon3:c.100G>A:p.G34R,CTNNB1:NM_001098210:exon3:c.100G>A:p.G34R,CTNNB1:NM_001904:exon3:c.100G>A:p.G34R,CTNNB1:NM_001330729:exon4:c.79G>A:p.G27R	-	-	-	-	-	-	-	-	-	-	-	-	-	-	-	-	-	-	-	-	-	-	-	-	-	-	-	-	-	-	-	-	-	-	endometrium	6
3	41266103	41266103	G	C	exonic	CTNNB1	-	nonsynonymous SNV	CTNNB1:NM_001098209:exon3:c.100G>C:p.G34R,CTNNB1:NM_001098210:exon3:c.100G>C:p.G34R,CTNNB1:NM_001904:exon3:c.100G>C:p.G34R,CTNNB1:NM_001330729:exon4:c.79G>C:p.G27R	-	-	-	-	-	-	-	-	-	-	-	-	-	-	-	-	-	-	-	-	-	-	-	-	-	-	-	-	-	-	-	-	-	-	endometrium	1
4	153249385	153249385	G	A	exonic	FBXW7	-	nonsynonymous SNV	FBXW7:NM_001013415:exon8:c.1039C>T:p.R347C,FBXW7:NM_018315:exon8:c.1153C>T:p.R385C,FBXW7:NM_033632:exon9:c.1393C>T:p.R465C,FBXW7:NM_001349798:exon11:c.1393C>T:p.R465C	4.325e-06	3.714e-05	7.969e-06	0	2.386e-05	0	3.714e-05	0	0	0	0	0	0	3.714e-05	3.715e-05	3.726e-05	7.169e-05	-	-	-	-	-	-	-	-	-	-	-	-	-	-	-	-	-	endometrium	7
17	7577539	7577539	G	A	exonic	TP53	-	nonsynonymous SNV	TP53:NM_001126115:exon3:c.346C>T:p.R116W,TP53:NM_001126116:exon3:c.346C>T:p.R116W,TP53:NM_001126117:exon3:c.346C>T:p.R116W,TP53:NM_001276697:exon3:c.265C>T:p.R89W,TP53:NM_001276698:exon3:c.265C>T:p.R89W,TP53:NM_001276699:exon3:c.265C>T:p.R89W,TP53:NM_001126118:exon6:c.625C>T:p.R209W,TP53:NM_000546:exon7:c.742C>T:p.R248W,TP53:NM_001126112:exon7:c.742C>T:p.R248W,TP53:NM_001126113:exon7:c.742C>T:p.R…	3.977e-06	8.791e-06	7.358e-06	0	1.193e-05	0	0	0	0	8.791e-06	0	0	0	8.955e-06	1.117e-05	9.733e-06	2.338e-05	-	-	-	-	-	-	-	-	-	-	-	-	-	-	-	-	-	endometrium	7
2	178098945	178098945	G	C	exonic	NFE2L2	-	nonsynonymous SNV	NFE2L2:NM_001145412:exon2:c.52C>G:p.R18G,NFE2L2:NM_001145413:exon2:c.52C>G:p.R18G,NFE2L2:NM_001313900:exon2:c.52C>G:p.R18G,NFE2L2:NM_001313901:exon2:c.52C>G:p.R18G,NFE2L2:NM_001313902:exon2:c.100C>G:p.R34G,NFE2L2:NM_006164:exon2:c.100C>G:p.R34G	-	-	-	-	-	-	-	-	-	-	-	-	-	-	-	-	-	-	-	-	-	-	-	-	-	-	-	-	-	-	-	-	-	-	endometrium	7
17	7577559	7577559	G	C	exonic	TP53	-	nonsynonymous SNV	TP53:NM_001126115:exon3:c.326C>G:p.S109C,TP53:NM_001126116:exon3:c.326C>G:p.S109C,TP53:NM_001126117:exon3:c.326C>G:p.S109C,TP53:NM_001276697:exon3:c.245C>G:p.S82C,TP53:NM_001276698:exon3:c.245C>G:p.S82C,TP53:NM_001276699:exon3:c.245C>G:p.S82C,TP53:NM_001126118:exon6:c.605C>G:p.S202C,TP53:NM_000546:exon7:c.722C>G:p.S241C,TP53:NM_001126112:exon7:c.722C>G:p.S241C,TP53:NM_001126113:exon7:c.722C>G:p.S…	0	.	0	0	3.976e-06	0	0	0	0	0	0	0	0	.	.	.	.	-	-	-	-	-	-	-	-	-	-	-	-	-	-	-	-	-	endometrium	4
17	7577559	7577559	G	T	exonic	TP53	-	nonsynonymous SNV	TP53:NM_001126115:exon3:c.326C>A:p.S109Y,TP53:NM_001126116:exon3:c.326C>A:p.S109Y,TP53:NM_001126117:exon3:c.326C>A:p.S109Y,TP53:NM_001276697:exon3:c.245C>A:p.S82Y,TP53:NM_001276698:exon3:c.245C>A:p.S82Y,TP53:NM_001276699:exon3:c.245C>A:p.S82Y,TP53:NM_001126118:exon6:c.605C>A:p.S202Y,TP53:NM_000546:exon7:c.722C>A:p.S241Y,TP53:NM_001126112:exon7:c.722C>A:p.S241Y,TP53:NM_001126113:exon7:c.722C>A:p.S…	-	-	-	-	-	-	-	-	-	-	-	-	-	-	-	-	-	-	-	-	-	-	-	-	-	-	-	-	-	-	-	-	-	-	endometrium	2
17	7577559	7577559	G	A	exonic	TP53	-	nonsynonymous SNV	TP53:NM_001126115:exon3:c.326C>T:p.S109F,TP53:NM_001126116:exon3:c.326C>T:p.S109F,TP53:NM_001126117:exon3:c.326C>T:p.S109F,TP53:NM_001276697:exon3:c.245C>T:p.S82F,TP53:NM_001276698:exon3:c.245C>T:p.S82F,TP53:NM_001276699:exon3:c.245C>T:p.S82F,TP53:NM_001126118:exon6:c.605C>T:p.S202F,TP53:NM_000546:exon7:c.722C>T:p.S241F,TP53:NM_001126112:exon7:c.722C>T:p.S241F,TP53:NM_001126113:exon7:c.722C>T:p.S…	3.977e-06	8.791e-06	0	8.653e-06	7.952e-06	0	0	0	0	8.791e-06	0	0	0	.	1.117e-05	9.733e-06	.	-	-	-	-	-	-	-	-	-	-	-	-	-	-	-	-	-	endometrium	1
2	158630626	158630626	C	T	exonic	ACVR1	-	nonsynonymous SNV	ACVR1:NM_001105:exon6:c.617G>A:p.R206H,ACVR1:NM_001111067:exon6:c.617G>A:p.R206H,ACVR1:NM_001347663:exon6:c.617G>A:p.R206H,ACVR1:NM_001347664:exon7:c.617G>A:p.R206H,ACVR1:NM_001347665:exon7:c.617G>A:p.R206H,ACVR1:NM_001347666:exon7:c.617G>A:p.R206H,ACVR1:NM_001347667:exon7:c.617G>A:p.R206H	-	-	-	-	-	-	-	-	-	-	-	-	-	-	-	-	-	-	-	-	-	-	-	-	-	-	-	-	-	-	-	-	-	-	endometrium	7
3	178916891	178916891	G	A	exonic	PIK3CA	-	nonsynonymous SNV	PIK3CA:NM_006218:exon2:c.278G>A:p.R93Q	-	-	-	-	-	-	-	-	-	-	-	-	-	-	-	-	-	-	-	-	-	-	-	-	-	-	-	-	-	-	-	-	-	-	endometrium	7
12	25398285	25398285	C	A	exonic	KRAS	-	nonsynonymous SNV	KRAS:NM_001369786:exon2:c.34G>T:p.G12C,KRAS:NM_001369787:exon2:c.34G>T:p.G12C,KRAS:NM_004985:exon2:c.34G>T:p.G12C,KRAS:NM_033360:exon2:c.34G>T:p.G12C	0	.	0	0	1.988e-05	0	0	0	0	0	0	0	0	.	.	.	.	-	-	-	-	-	-	-	-	-	-	-	-	-	-	-	-	-	endometrium	4
12	25398285	25398285	C	T	exonic	KRAS	-	nonsynonymous SNV	KRAS:NM_001369786:exon2:c.34G>A:p.G12S,KRAS:NM_001369787:exon2:c.34G>A:p.G12S,KRAS:NM_004985:exon2:c.34G>A:p.G12S,KRAS:NM_033360:exon2:c.34G>A:p.G12S	0	.	0	0	7.953e-06	0	0	0	0	0	0	0	0	.	.	.	.	-	-	-	-	-	-	-	-	-	-	-	-	-	-	-	-	-	endometrium	3
4	153249510	153249510	C	A	exonic	FBXW7	-	nonsynonymous SNV	FBXW7:NM_001013415:exon8:c.914G>T:p.G305V,FBXW7:NM_018315:exon8:c.1028G>T:p.G343V,FBXW7:NM_033632:exon9:c.1268G>T:p.G423V,FBXW7:NM_001349798:exon11:c.1268G>T:p.G423V	0	.	0	0	3.978e-06	0	0	0	0	0	0	0	0	.	.	.	.	-	-	-	-	-	-	-	-	-	-	-	-	-	-	-	-	-	endometrium	6
4	153249510	153249510	C	G	exonic	FBXW7	-	nonsynonymous SNV	FBXW7:NM_001013415:exon8:c.914G>C:p.G305A,FBXW7:NM_018315:exon8:c.1028G>C:p.G343A,FBXW7:NM_033632:exon9:c.1268G>C:p.G423A,FBXW7:NM_001349798:exon11:c.1268G>C:p.G423A	-	-	-	-	-	-	-	-	-	-	-	-	-	-	-	-	-	-	-	-	-	-	-	-	-	-	-	-	-	-	-	-	-	-	endometrium	1
17	7578190	7578190	T	C	exonic	TP53	-	nonsynonymous SNV	TP53:NM_001126115:exon2:c.263A>G:p.Y88C,TP53:NM_001126116:exon2:c.263A>G:p.Y88C,TP53:NM_001126117:exon2:c.263A>G:p.Y88C,TP53:NM_001276697:exon2:c.182A>G:p.Y61C,TP53:NM_001276698:exon2:c.182A>G:p.Y61C,TP53:NM_001276699:exon2:c.182A>G:p.Y61C,TP53:NM_001126118:exon5:c.542A>G:p.Y181C,TP53:NM_000546:exon6:c.659A>G:p.Y220C,TP53:NM_001126112:exon6:c.659A>G:p.Y220C,TP53:NM_001126113:exon6:c.659A>G:p.Y220…	7.955e-06	1.759e-05	7.359e-06	8.656e-06	1.988e-05	0	0	0	0	1.759e-05	0	0	0	1.792e-05	1.117e-05	1.947e-05	2.339e-05	-	-	-	-	-	-	-	-	-	-	-	-	-	-	-	-	-	endometrium	7
19	52715982	52715982	C	T	exonic	PPP2R1A	-	nonsynonymous SNV	PPP2R1A:NM_001363656:exon5:c.10C>T:p.R4W,PPP2R1A:NM_014225:exon5:c.547C>T:p.R183W	-	-	-	-	-	-	-	-	-	-	-	-	-	-	-	-	-	-	-	-	-	-	-	-	-	-	-	-	-	-	-	-	-	-	endometrium	5
19	52715982	52715982	C	G	exonic	PPP2R1A	-	nonsynonymous SNV	PPP2R1A:NM_001363656:exon5:c.10C>G:p.R4G,PPP2R1A:NM_014225:exon5:c.547C>G:p.R183G	-	-	-	-	-	-	-	-	-	-	-	-	-	-	-	-	-	-	-	-	-	-	-	-	-	-	-	-	-	-	-	-	-	-	endometrium	1
3	178916725	178916725	C	T	exonic	PIK3CA	-	nonsynonymous SNV	PIK3CA:NM_006218:exon2:c.112C>T:p.R38C	0	.	0	0	4.003e-06	0	0	0	0	0	0	0	0	.	.	.	.	-	-	-	-	-	-	-	-	-	-	-	-	-	-	-	-	-	endometrium	5
3	178916725	178916725	C	A	exonic	PIK3CA	-	nonsynonymous SNV	PIK3CA:NM_006218:exon2:c.112C>A:p.R38S	-	-	-	-	-	-	-	-	-	-	-	-	-	-	-	-	-	-	-	-	-	-	-	-	-	-	-	-	-	-	-	-	-	-	endometrium	1
14	65560514	65560514	T	C	exonic	MAX	-	nonsynonymous SNV	MAX:NM_001271068:exon2:c.56A>G:p.H19R,MAX:NM_001271069:exon2:c.56A>G:p.H19R,MAX:NM_145112:exon2:c.56A>G:p.H19R,MAX:NM_002382:exon3:c.83A>G:p.H28R,MAX:NM_145113:exon3:c.83A>G:p.H28R,MAX:NM_145114:exon3:c.83A>G:p.H28R,MAX:NM_197957:exon3:c.83A>G:p.H28R	-	-	-	-	-	-	-	-	-	-	-	-	-	-	-	-	-	-	-	-	-	-	-	-	-	-	-	-	-	-	-	-	-	-	endometrium	6
2	16082317	16082317	C	T	exonic	MYCN	-	nonsynonymous SNV	MYCN:NM_001293228:exon2:c.131C>T:p.P44L,MYCN:NM_005378:exon2:c.131C>T:p.P44L	-	-	-	-	-	-	-	-	-	-	-	-	-	-	-	-	-	-	-	-	-	-	-	-	-	-	-	-	-	-	-	-	-	-	endometrium	6
2	39281778	39281778	T	A	exonic	SOS1	-	nonsynonymous SNV	SOS1:NM_005633:exon5:c.697A>T:p.N233Y	-	-	-	-	-	-	-	-	-	-	-	-	-	-	-	-	-	-	-	-	-	-	-	-	-	-	-	-	-	-	-	-	-	-	endometrium	6
5	67591097	67591097	A	G	exonic	PIK3R1	-	nonsynonymous SNV	PIK3R1:NM_001242466:exon6:c.601A>G:p.N201D,PIK3R1:NM_181504:exon7:c.880A>G:p.N294D,PIK3R1:NM_181524:exon7:c.790A>G:p.N264D,PIK3R1:NM_181523:exon13:c.1690A>G:p.N564D	-	-	-	-	-	-	-	-	-	-	-	-	-	-	-	-	-	-	-	-	-	-	-	-	-	-	-	-	-	-	-	-	-	-	endometrium	6
5	16694613	16694613	C	T	exonic	MYO10	-	nonsynonymous SNV	MYO10:NM_012334:exon27:c.3667G>A:p.G1223R	-	-	-	-	-	-	-	-	-	-	-	-	-	-	-	-	-	3.186e-05	.	0	7.184e-05	3.183e-05	0	.	0	0	0	0	0	0.0009	.	.	.	.	endometrium	6
3	178936094	178936094	C	A	exonic	PIK3CA	-	nonsynonymous SNV	PIK3CA:NM_006218:exon10:c.1636C>A:p.Q546K	-	-	-	-	-	-	-	-	-	-	-	-	-	-	-	-	-	-	-	-	-	-	-	-	-	-	-	-	-	-	-	-	-	-	endometrium	5
3	178936094	178936094	C	G	exonic	PIK3CA	-	nonsynonymous SNV	PIK3CA:NM_006218:exon10:c.1636C>G:p.Q546E	-	-	-	-	-	-	-	-	-	-	-	-	-	-	-	-	-	-	-	-	-	-	-	-	-	-	-	-	-	-	-	-	-	-	endometrium	1
17	37881332	37881332	G	A	exonic	ERBB2	-	nonsynonymous SNV	ERBB2:NM_001289937:exon21:c.2524G>A:p.V842I,ERBB2:NM_004448:exon21:c.2524G>A:p.V842I,ERBB2:NM_001005862:exon24:c.2434G>A:p.V812I,ERBB2:NM_001289936:exon25:c.2479G>A:p.V827I	3.978e-06	8.793e-06	0	8.656e-06	3.976e-06	0	0	0	0	8.793e-06	0	0	0	8.958e-06	1.117e-05	9.734e-06	.	-	-	-	-	-	-	-	-	-	-	-	-	-	-	-	-	-	endometrium	6
11	69466019	69466019	C	T	exonic	CCND1	-	nonsynonymous SNV	CCND1:NM_053056:exon5:c.857C>T:p.T286I	-	-	-	-	-	-	-	-	-	-	-	-	-	-	-	-	-	-	-	-	-	-	-	-	-	-	-	-	-	-	-	-	-	-	endometrium	5
11	69466019	69466019	C	G	exonic	CCND1	-	nonsynonymous SNV	CCND1:NM_053056:exon5:c.857C>G:p.T286R	-	-	-	-	-	-	-	-	-	-	-	-	-	-	-	-	-	-	-	-	-	-	-	-	-	-	-	-	-	-	-	-	-	-	endometrium	1
20	34302145	34302145	G	A	exonic	RBM39	-	nonsynonymous SNV	RBM39:NM_001242599:exon10:c.992C>T:p.T331I,RBM39:NM_001242600:exon10:c.992C>T:p.T331I,RBM39:NM_001323422:exon11:c.1058C>T:p.T353I,RBM39:NM_001323424:exon11:c.1055C>T:p.T352I,RBM39:NM_004902:exon11:c.1058C>T:p.T353I,RBM39:NM_184234:exon11:c.1058C>T:p.T353I,RBM39:NM_001323423:exon13:c.587C>T:p.T196I	-	-	-	-	-	-	-	-	-	-	-	-	-	-	-	-	-	-	-	-	-	-	-	-	-	-	-	-	-	-	-	-	-	-	endometrium	6
3	178952074	178952074	G	A	exonic	PIK3CA	-	nonsynonymous SNV	PIK3CA:NM_006218:exon21:c.3129G>A:p.M1043I	-	-	-	-	-	-	-	-	-	-	-	-	-	-	-	-	-	-	-	-	-	-	-	-	-	-	-	-	-	-	-	-	-	-	endometrium	4
3	178952074	178952074	G	T	exonic	PIK3CA	-	nonsynonymous SNV	PIK3CA:NM_006218:exon21:c.3129G>T:p.M1043I	-	-	-	-	-	-	-	-	-	-	-	-	-	-	-	-	-	-	-	-	-	-	-	-	-	-	-	-	-	-	-	-	-	-	endometrium	1
4	153247366	153247366	C	T	exonic	FBXW7	-	nonsynonymous SNV	FBXW7:NM_001013415:exon9:c.1082G>A:p.R361Q,FBXW7:NM_018315:exon9:c.1196G>A:p.R399Q,FBXW7:NM_033632:exon10:c.1436G>A:p.R479Q,FBXW7:NM_001349798:exon12:c.1436G>A:p.R479Q	-	-	-	-	-	-	-	-	-	-	-	-	-	-	-	-	-	-	-	-	-	-	-	-	-	-	-	-	-	-	-	-	-	-	endometrium	5
2	178098799	178098799	T	A	exonic	NFE2L2	-	nonsynonymous SNV	NFE2L2:NM_001145412:exon2:c.198A>T:p.E66D,NFE2L2:NM_001145413:exon2:c.198A>T:p.E66D,NFE2L2:NM_001313900:exon2:c.198A>T:p.E66D,NFE2L2:NM_001313901:exon2:c.198A>T:p.E66D,NFE2L2:NM_001313902:exon2:c.246A>T:p.E82D,NFE2L2:NM_006164:exon2:c.246A>T:p.E82D	-	-	-	-	-	-	-	-	-	-	-	-	-	-	-	-	-	-	-	-	-	-	-	-	-	-	-	-	-	-	-	-	-	-	endometrium	5
16	67654642	67654642	C	T	exonic	CTCF	-	nonsynonymous SNV	CTCF:NM_001191022:exon4:c.145C>T:p.R49C,CTCF:NM_001363916:exon6:c.1129C>T:p.R377C,CTCF:NM_006565:exon6:c.1129C>T:p.R377C	-	-	-	-	-	-	-	-	-	-	-	-	-	-	-	-	-	-	-	-	-	-	-	-	-	-	-	-	-	-	-	-	-	-	endometrium	5
3	178916726	178916726	G	A	exonic	PIK3CA	-	nonsynonymous SNV	PIK3CA:NM_006218:exon2:c.113G>A:p.R38H	4.021e-06	2.915e-05	0	8.791e-06	8.006e-06	0	0	2.915e-05	0	0	0	0	0	2.927e-05	3.306e-05	2.944e-05	.	-	-	-	-	-	-	-	-	-	-	-	-	-	-	-	-	-	endometrium	5
1	115256529	115256529	T	C	exonic	NRAS	-	nonsynonymous SNV	NRAS:NM_002524:exon3:c.182A>G:p.Q61R	-	-	-	-	-	-	-	-	-	-	-	-	-	-	-	-	-	-	-	-	-	-	-	-	-	-	-	-	-	-	-	-	-	-	endometrium	5
19	18273784	18273784	G	A	exonic	PIK3R2	-	nonsynonymous SNV	PIK3R2:NM_005027:exon10:c.1117G>A:p.G373R	-	-	-	-	-	-	-	-	-	-	-	-	-	-	-	-	-	-	-	-	-	-	-	-	-	-	-	-	-	-	-	-	-	-	endometrium	5
3	178936083	178936083	A	C	exonic	PIK3CA	-	nonsynonymous SNV	PIK3CA:NM_006218:exon10:c.1625A>C:p.E542A	-	-	-	-	-	-	-	-	-	-	-	-	-	-	-	-	-	-	-	-	-	-	-	-	-	-	-	-	-	-	-	-	-	-	endometrium	3
3	178936083	178936083	A	T	exonic	PIK3CA	-	nonsynonymous SNV	PIK3CA:NM_006218:exon10:c.1625A>T:p.E542V	0	.	0	0	4.004e-06	0	0	0	0	0	0	0	0	.	.	.	.	-	-	-	-	-	-	-	-	-	-	-	-	-	-	-	-	-	endometrium	2
12	6700659	6700659	G	A	exonic	CHD4	-	nonsynonymous SNV	CHD4:NM_001297553:exon21:c.3292C>T:p.R1098W,CHD4:NM_001273:exon22:c.3313C>T:p.R1105W,CHD4:NM_001363606:exon22:c.3274C>T:p.R1092W	-	-	-	-	-	-	-	-	-	-	-	-	-	-	-	-	-	-	-	-	-	-	-	-	-	-	-	-	-	-	-	-	-	-	endometrium	5
10	123258034	123258034	A	T	exonic	FGFR2	-	nonsynonymous SNV	FGFR2:NM_001144914:exon9:c.1311T>A:p.N437K,FGFR2:NM_001144916:exon9:c.1302T>A:p.N434K,FGFR2:NM_001144917:exon10:c.1299T>A:p.N433K,FGFR2:NM_001144918:exon10:c.1296T>A:p.N432K,FGFR2:NM_023029:exon10:c.1380T>A:p.N460K,FGFR2:NM_001144913:exon11:c.1650T>A:p.N550K,FGFR2:NM_001144915:exon11:c.1380T>A:p.N460K,FGFR2:NM_001144919:exon11:c.1383T>A:p.N461K,FGFR2:NM_001320654:exon11:c.963T>A:p.N321K,FGFR2:NM_…	-	-	-	-	-	-	-	-	-	-	-	-	-	-	-	-	-	-	-	-	-	-	-	-	-	-	-	-	-	-	-	-	-	-	endometrium	5
17	7577094	7577094	G	A	exonic	TP53	-	nonsynonymous SNV	TP53:NM_001126115:exon4:c.448C>T:p.R150W,TP53:NM_001126116:exon4:c.448C>T:p.R150W,TP53:NM_001126117:exon4:c.448C>T:p.R150W,TP53:NM_001276697:exon4:c.367C>T:p.R123W,TP53:NM_001276698:exon4:c.367C>T:p.R123W,TP53:NM_001276699:exon4:c.367C>T:p.R123W,TP53:NM_001126118:exon7:c.727C>T:p.R243W,TP53:NM_000546:exon8:c.844C>T:p.R282W,TP53:NM_001126112:exon8:c.844C>T:p.R282W,TP53:NM_001126113:exon8:c.844C>T:…	3.978e-06	8.793e-06	0	8.655e-06	7.952e-06	0	0	0	0	8.793e-06	0	0	0	8.957e-06	1.117e-05	.	.	-	-	-	-	-	-	-	-	-	-	-	-	-	-	-	-	-	endometrium	5
3	178921548	178921548	G	A	exonic	PIK3CA	-	nonsynonymous SNV	PIK3CA:NM_006218:exon5:c.1030G>A:p.V344M	-	-	-	-	-	-	-	-	-	-	-	-	-	-	-	-	-	-	-	-	-	-	-	-	-	-	-	-	-	-	-	-	-	-	endometrium	5
11	14316390	14316390	T	A	exonic	RRAS2	-	nonsynonymous SNV	RRAS2:NM_001177314:exon3:c.110A>T:p.Q37L,RRAS2:NM_012250:exon3:c.215A>T:p.Q72L	-	-	-	-	-	-	-	-	-	-	-	-	-	-	-	-	-	-	-	-	-	-	-	-	-	-	-	-	-	-	-	-	-	-	endometrium	5
3	41266112	41266112	T	G	exonic	CTNNB1	-	nonsynonymous SNV	CTNNB1:NM_001098209:exon3:c.109T>G:p.S37A,CTNNB1:NM_001098210:exon3:c.109T>G:p.S37A,CTNNB1:NM_001904:exon3:c.109T>G:p.S37A,CTNNB1:NM_001330729:exon4:c.88T>G:p.S30A	-	-	-	-	-	-	-	-	-	-	-	-	-	-	-	-	-	-	-	-	-	-	-	-	-	-	-	-	-	-	-	-	-	-	endometrium	3
3	41266112	41266112	T	C	exonic	CTNNB1	-	nonsynonymous SNV	CTNNB1:NM_001098209:exon3:c.109T>C:p.S37P,CTNNB1:NM_001098210:exon3:c.109T>C:p.S37P,CTNNB1:NM_001904:exon3:c.109T>C:p.S37P,CTNNB1:NM_001330729:exon4:c.88T>C:p.S30P	-	-	-	-	-	-	-	-	-	-	-	-	-	-	-	-	-	-	-	-	-	-	-	-	-	-	-	-	-	-	-	-	-	-	endometrium	2
3	41266098	41266098	A	G	exonic	CTNNB1	-	nonsynonymous SNV	CTNNB1:NM_001098209:exon3:c.95A>G:p.D32G,CTNNB1:NM_001098210:exon3:c.95A>G:p.D32G,CTNNB1:NM_001904:exon3:c.95A>G:p.D32G,CTNNB1:NM_001330729:exon4:c.74A>G:p.D25G	-	-	-	-	-	-	-	-	-	-	-	-	-	-	-	-	-	-	-	-	-	-	-	-	-	-	-	-	-	-	-	-	-	-	endometrium	2
3	41266098	41266098	A	C	exonic	CTNNB1	-	nonsynonymous SNV	CTNNB1:NM_001098209:exon3:c.95A>C:p.D32A,CTNNB1:NM_001098210:exon3:c.95A>C:p.D32A,CTNNB1:NM_001904:exon3:c.95A>C:p.D32A,CTNNB1:NM_001330729:exon4:c.74A>C:p.D25A	-	-	-	-	-	-	-	-	-	-	-	-	-	-	-	-	-	-	-	-	-	-	-	-	-	-	-	-	-	-	-	-	-	-	endometrium	2
3	41266098	41266098	A	T	exonic	CTNNB1	-	nonsynonymous SNV	CTNNB1:NM_001098209:exon3:c.95A>T:p.D32V,CTNNB1:NM_001098210:exon3:c.95A>T:p.D32V,CTNNB1:NM_001904:exon3:c.95A>T:p.D32V,CTNNB1:NM_001330729:exon4:c.74A>T:p.D25V	-	-	-	-	-	-	-	-	-	-	-	-	-	-	-	-	-	-	-	-	-	-	-	-	-	-	-	-	-	-	-	-	-	-	endometrium	1
17	7578406	7578406	C	T	exonic	TP53	-	nonsynonymous SNV	TP53:NM_001126115:exon1:c.128G>A:p.R43H,TP53:NM_001126116:exon1:c.128G>A:p.R43H,TP53:NM_001126117:exon1:c.128G>A:p.R43H,TP53:NM_001276697:exon1:c.47G>A:p.R16H,TP53:NM_001276698:exon1:c.47G>A:p.R16H,TP53:NM_001276699:exon1:c.47G>A:p.R16H,TP53:NM_001126118:exon4:c.407G>A:p.R136H,TP53:NM_000546:exon5:c.524G>A:p.R175H,TP53:NM_001126112:exon5:c.524G>A:p.R175H,TP53:NM_001126113:exon5:c.524G>A:p.R175H,T…	3.98e-06	8.803e-06	7.362e-06	0	3.976e-06	0	0	0	0	8.803e-06	0	0	0	8.968e-06	1.118e-05	9.747e-06	.	-	-	-	-	-	-	-	-	-	-	-	-	-	-	-	-	-	endometrium	5
10	123274774	123274774	A	G	exonic	FGFR2	-	nonsynonymous SNV	FGFR2:NM_001144914:exon6:c.808T>C:p.C270R,FGFR2:NM_001144916:exon6:c.799T>C:p.C267R,FGFR2:NM_001144918:exon7:c.799T>C:p.C267R,FGFR2:NM_023029:exon7:c.877T>C:p.C293R,FGFR2:NM_001144913:exon8:c.1147T>C:p.C383R,FGFR2:NM_001144915:exon8:c.877T>C:p.C293R,FGFR2:NM_001144919:exon8:c.880T>C:p.C294R,FGFR2:NM_001320654:exon8:c.460T>C:p.C154R,FGFR2:NM_000141:exon9:c.1144T>C:p.C382R,FGFR2:NM_001320658:exon9:…	-	-	-	-	-	-	-	-	-	-	-	-	-	-	-	-	-	-	-	-	-	-	-	-	-	-	-	-	-	-	-	-	-	-	endometrium	5
3	41266124	41266124	A	G	exonic	CTNNB1	-	nonsynonymous SNV	CTNNB1:NM_001098209:exon3:c.121A>G:p.T41A,CTNNB1:NM_001098210:exon3:c.121A>G:p.T41A,CTNNB1:NM_001904:exon3:c.121A>G:p.T41A,CTNNB1:NM_001330729:exon4:c.100A>G:p.T34A	-	-	-	-	-	-	-	-	-	-	-	-	-	-	-	-	-	-	-	-	-	-	-	-	-	-	-	-	-	-	-	-	-	-	endometrium	5
3	178936092	178936092	A	C	exonic	PIK3CA	-	nonsynonymous SNV	PIK3CA:NM_006218:exon10:c.1634A>C:p.E545A	0	.	0	0	1.201e-05	0	0	0	0	0	0	0	0	.	.	.	.	-	-	-	-	-	-	-	-	-	-	-	-	-	-	-	-	-	endometrium	4
3	178936092	178936092	A	G	exonic	PIK3CA	-	nonsynonymous SNV	PIK3CA:NM_006218:exon10:c.1634A>G:p.E545G	0	.	0	0	8.007e-06	0	0	0	0	0	0	0	0	.	.	.	.	-	-	-	-	-	-	-	-	-	-	-	-	-	-	-	-	-	endometrium	1
12	133253184	133253184	G	C	exonic	POLE	-	nonsynonymous SNV	POLE:NM_006231:exon9:c.857C>G:p.P286R	-	-	-	-	-	-	-	-	-	-	-	-	-	-	-	-	-	-	-	-	-	-	-	-	-	-	-	-	-	-	-	-	-	-	endometrium	5
4	153247288	153247288	C	T	exonic	FBXW7	-	nonsynonymous SNV	FBXW7:NM_001013415:exon9:c.1160G>A:p.R387H,FBXW7:NM_018315:exon9:c.1274G>A:p.R425H,FBXW7:NM_033632:exon10:c.1514G>A:p.R505H,FBXW7:NM_001349798:exon12:c.1514G>A:p.R505H	-	-	-	-	-	-	-	-	-	-	-	-	-	-	-	-	-	-	-	-	-	-	-	-	-	-	-	-	-	-	-	-	-	-	endometrium	3
4	153247288	153247288	C	A	exonic	FBXW7	-	nonsynonymous SNV	FBXW7:NM_001013415:exon9:c.1160G>T:p.R387L,FBXW7:NM_018315:exon9:c.1274G>T:p.R425L,FBXW7:NM_033632:exon10:c.1514G>T:p.R505L,FBXW7:NM_001349798:exon12:c.1514G>T:p.R505L	-	-	-	-	-	-	-	-	-	-	-	-	-	-	-	-	-	-	-	-	-	-	-	-	-	-	-	-	-	-	-	-	-	-	endometrium	1
3	178952072	178952072	A	G	exonic	PIK3CA	-	nonsynonymous SNV	PIK3CA:NM_006218:exon21:c.3127A>G:p.M1043V	-	-	-	-	-	-	-	-	-	-	-	-	-	-	-	-	-	-	-	-	-	-	-	-	-	-	-	-	-	-	-	-	-	-	endometrium	4
10	89711900	89711900	G	A	exonic	PTEN	-	nonsynonymous SNV	PTEN:NM_000314:exon6:c.518G>A:p.R173H,PTEN:NM_001304717:exon7:c.1037G>A:p.R346H	7.963e-06	6.155e-05	0	1.733e-05	7.953e-06	6.155e-05	0	0	0	0	0	9.923e-05	0	8.319e-05	6.169e-05	.	.	-	-	-	-	-	-	-	-	-	-	-	-	-	-	-	-	-	endometrium	3
10	89711900	89711900	G	T	exonic	PTEN	-	nonsynonymous SNV	PTEN:NM_000314:exon6:c.518G>T:p.R173L,PTEN:NM_001304717:exon7:c.1037G>T:p.R346L	-	-	-	-	-	-	-	-	-	-	-	-	-	-	-	-	-	-	-	-	-	-	-	-	-	-	-	-	-	-	-	-	-	-	endometrium	1
7	87179322	87179322	G	A	exonic	ABCB1	-	nonsynonymous SNV	ABCB1:NM_001348946:exon13:c.1399C>T:p.R467W,ABCB1:NM_000927:exon14:c.1399C>T:p.R467W,ABCB1:NM_001348944:exon15:c.1399C>T:p.R467W,ABCB1:NM_001348945:exon17:c.1609C>T:p.R537W	-	-	-	-	-	-	-	-	-	-	-	-	-	-	-	-	-	-	-	-	-	-	-	-	-	-	-	-	-	-	-	-	-	-	endometrium	4
10	11990443	11990443	T	A	exonic	UPF2	-	nonsynonymous SNV	UPF2:NM_015542:exon16:c.3099A>T:p.E1033D,UPF2:NM_080599:exon16:c.3099A>T:p.E1033D	4.041e-06	2.9e-05	7.461e-06	0	8.026e-06	0	0	2.9e-05	0	0	0	0	0	2.912e-05	3.288e-05	2.928e-05	5.857e-05	-	-	-	-	-	-	-	-	-	-	-	-	-	-	-	-	-	endometrium	4
10	89692922	89692922	T	C	exonic	PTEN	-	nonsynonymous SNV	PTEN:NM_000314:exon5:c.406T>C:p.C136R,PTEN:NM_001304717:exon6:c.925T>C:p.C309R	-	-	-	-	-	-	-	-	-	-	-	-	-	-	-	-	-	-	-	-	-	-	-	-	-	-	-	-	-	-	-	-	-	-	endometrium	4
3	178952007	178952007	A	G	exonic	PIK3CA	-	nonsynonymous SNV	PIK3CA:NM_006218:exon21:c.3062A>G:p.Y1021C	-	-	-	-	-	-	-	-	-	-	-	-	-	-	-	-	-	-	-	-	-	-	-	-	-	-	-	-	-	-	-	-	-	-	endometrium	4
12	6701583	6701583	C	T	exonic	CHD4	-	nonsynonymous SNV	CHD4:NM_001297553:exon18:c.2903G>A:p.R968H,CHD4:NM_001273:exon19:c.2924G>A:p.R975H,CHD4:NM_001363606:exon19:c.2885G>A:p.R962H	-	-	-	-	-	-	-	-	-	-	-	-	-	-	-	-	-	-	-	-	-	-	-	-	-	-	-	-	-	-	-	-	-	-	endometrium	4
3	178921552	178921552	A	T	exonic	PIK3CA	-	nonsynonymous SNV	PIK3CA:NM_006218:exon5:c.1034A>T:p.N345I	-	-	-	-	-	-	-	-	-	-	-	-	-	-	-	-	-	-	-	-	-	-	-	-	-	-	-	-	-	-	-	-	-	-	endometrium	3
3	178921552	178921552	A	C	exonic	PIK3CA	-	nonsynonymous SNV	PIK3CA:NM_006218:exon5:c.1034A>C:p.N345T	-	-	-	-	-	-	-	-	-	-	-	-	-	-	-	-	-	-	-	-	-	-	-	-	-	-	-	-	-	-	-	-	-	-	endometrium	1
12	6697097	6697097	G	A	exonic	CHD4	-	nonsynonymous SNV	CHD4:NM_001297553:exon23:c.3463C>T:p.R1155W,CHD4:NM_001273:exon24:c.3484C>T:p.R1162W,CHD4:NM_001363606:exon24:c.3445C>T:p.R1149W	-	-	-	-	-	-	-	-	-	-	-	-	-	-	-	-	-	-	-	-	-	-	-	-	-	-	-	-	-	-	-	-	-	-	endometrium	4
16	67654643	67654643	G	A	exonic	CTCF	-	nonsynonymous SNV	CTCF:NM_001191022:exon4:c.146G>A:p.R49H,CTCF:NM_001363916:exon6:c.1130G>A:p.R377H,CTCF:NM_006565:exon6:c.1130G>A:p.R377H	0	.	0	0	7.952e-06	0	0	0	0	0	0	0	0	.	.	.	.	-	-	-	-	-	-	-	-	-	-	-	-	-	-	-	-	-	endometrium	4
3	178952084	178952084	C	T	exonic	PIK3CA	-	nonsynonymous SNV	PIK3CA:NM_006218:exon21:c.3139C>T:p.H1047Y	-	-	-	-	-	-	-	-	-	-	-	-	-	-	-	-	-	-	-	-	-	-	-	-	-	-	-	-	-	-	-	-	-	-	endometrium	4
4	153247168	153247168	T	C	exonic	FBXW7	-	nonsynonymous SNV	FBXW7:NM_001013415:exon9:c.1280A>G:p.Y427C,FBXW7:NM_018315:exon9:c.1394A>G:p.Y465C,FBXW7:NM_033632:exon10:c.1634A>G:p.Y545C,FBXW7:NM_001349798:exon12:c.1634A>G:p.Y545C	-	-	-	-	-	-	-	-	-	-	-	-	-	-	-	-	-	-	-	-	-	-	-	-	-	-	-	-	-	-	-	-	-	-	endometrium	4
4	119626803	119626803	G	C	exonic	METTL14	-	nonsynonymous SNV	METTL14:NM_020961:exon10:c.893G>C:p.R298P	-	-	-	-	-	-	-	-	-	-	-	-	-	-	-	-	-	-	-	-	-	-	-	-	-	-	-	-	-	-	-	-	-	-	endometrium	4
12	56478854	56478854	G	A	exonic	ERBB3	-	nonsynonymous SNV	ERBB3:NM_001005915:exon3:c.310G>A:p.V104M,ERBB3:NM_001982:exon3:c.310G>A:p.V104M	-	-	-	-	-	-	-	-	-	-	-	-	-	-	-	-	-	-	-	-	-	-	-	-	-	-	-	-	-	-	-	-	-	-	endometrium	4
5	67589138	67589138	G	A	exonic	PIK3R1	-	nonsynonymous SNV	PIK3R1:NM_001242466:exon3:c.37G>A:p.G13R,PIK3R1:NM_181504:exon4:c.316G>A:p.G106R,PIK3R1:NM_181524:exon4:c.226G>A:p.G76R,PIK3R1:NM_181523:exon10:c.1126G>A:p.G376R	-	-	-	-	-	-	-	-	-	-	-	-	-	-	-	-	-	-	-	-	-	-	-	-	-	-	-	-	-	-	-	-	-	-	endometrium	3
5	67589138	67589138	G	C	exonic	PIK3R1	-	nonsynonymous SNV	PIK3R1:NM_001242466:exon3:c.37G>C:p.G13R,PIK3R1:NM_181504:exon4:c.316G>C:p.G106R,PIK3R1:NM_181524:exon4:c.226G>C:p.G76R,PIK3R1:NM_181523:exon10:c.1126G>C:p.G376R	-	-	-	-	-	-	-	-	-	-	-	-	-	-	-	-	-	-	-	-	-	-	-	-	-	-	-	-	-	-	-	-	-	-	endometrium	1
3	178952077	178952077	T	G	exonic	PIK3CA	-	nonsynonymous SNV	PIK3CA:NM_006218:exon21:c.3132T>G:p.N1044K	-	-	-	-	-	-	-	-	-	-	-	-	-	-	-	-	-	-	-	-	-	-	-	-	-	-	-	-	-	-	-	-	-	-	endometrium	2
3	178952077	178952077	T	A	exonic	PIK3CA	-	nonsynonymous SNV	PIK3CA:NM_006218:exon21:c.3132T>A:p.N1044K	-	-	-	-	-	-	-	-	-	-	-	-	-	-	-	-	-	-	-	-	-	-	-	-	-	-	-	-	-	-	-	-	-	-	endometrium	2
3	168834483	168834483	G	T	exonic	MECOM	-	nonsynonymous SNV	MECOM:NM_001105078:exon7:c.613C>A:p.R205S,MECOM:NM_001163999:exon7:c.616C>A:p.R206S,MECOM:NM_001164000:exon7:c.613C>A:p.R205S,MECOM:NM_001205194:exon7:c.613C>A:p.R205S,MECOM:NM_001366467:exon7:c.616C>A:p.R206S,MECOM:NM_001366468:exon7:c.616C>A:p.R206S,MECOM:NM_001366469:exon7:c.613C>A:p.R205S,MECOM:NM_001366470:exon7:c.616C>A:p.R206S,MECOM:NM_001366471:exon7:c.613C>A:p.R205S,MECOM:NM_001366472:ex…	-	-	-	-	-	-	-	-	-	-	-	-	-	-	-	-	-	-	-	-	-	-	-	-	-	-	-	-	-	-	-	-	-	-	endometrium	2
3	168834483	168834483	G	A	exonic	MECOM	-	nonsynonymous SNV	MECOM:NM_001105078:exon7:c.613C>T:p.R205C,MECOM:NM_001163999:exon7:c.616C>T:p.R206C,MECOM:NM_001164000:exon7:c.613C>T:p.R205C,MECOM:NM_001205194:exon7:c.613C>T:p.R205C,MECOM:NM_001366467:exon7:c.616C>T:p.R206C,MECOM:NM_001366468:exon7:c.616C>T:p.R206C,MECOM:NM_001366469:exon7:c.613C>T:p.R205C,MECOM:NM_001366470:exon7:c.616C>T:p.R206C,MECOM:NM_001366471:exon7:c.613C>T:p.R205C,MECOM:NM_001366472:ex…	4.014e-06	.	0	8.745e-06	3.977e-06	0	0	0	0	0	4.64e-05	0	0	.	.	.	.	-	-	-	-	-	-	-	-	-	-	-	-	-	-	-	-	-	endometrium	1
3	168834483	168834483	G	C	exonic	MECOM	-	nonsynonymous SNV	MECOM:NM_001105078:exon7:c.613C>G:p.R205G,MECOM:NM_001163999:exon7:c.616C>G:p.R206G,MECOM:NM_001164000:exon7:c.613C>G:p.R205G,MECOM:NM_001205194:exon7:c.613C>G:p.R205G,MECOM:NM_001366467:exon7:c.616C>G:p.R206G,MECOM:NM_001366468:exon7:c.616C>G:p.R206G,MECOM:NM_001366469:exon7:c.613C>G:p.R205G,MECOM:NM_001366470:exon7:c.616C>G:p.R206G,MECOM:NM_001366471:exon7:c.613C>G:p.R205G,MECOM:NM_001366472:ex…	-	-	-	-	-	-	-	-	-	-	-	-	-	-	-	-	-	-	-	-	-	-	-	-	-	-	-	-	-	-	-	-	-	-	endometrium	1
3	178936093	178936093	G	T	exonic	PIK3CA	-	nonsynonymous SNV	PIK3CA:NM_006218:exon10:c.1635G>T:p.E545D	-	-	-	-	-	-	-	-	-	-	-	-	-	-	-	-	-	-	-	-	-	-	-	-	-	-	-	-	-	-	-	-	-	-	endometrium	4
3	178921553	178921553	T	A	exonic	PIK3CA	-	nonsynonymous SNV	PIK3CA:NM_006218:exon5:c.1035T>A:p.N345K	-	-	-	-	-	-	-	-	-	-	-	-	-	-	-	-	-	-	-	-	-	-	-	-	-	-	-	-	-	-	-	-	-	-	endometrium	4
4	99978957	99978957	A	G	exonic	METAP1	-	nonsynonymous SNV	METAP1:NM_015143:exon10:c.985A>G:p.M329V	-	-	-	-	-	-	-	-	-	-	-	-	-	-	-	-	-	-	-	-	-	-	-	-	-	-	-	-	-	-	-	-	-	-	endometrium	4
10	89692791	89692791	A	T	exonic	PTEN	-	nonsynonymous SNV	PTEN:NM_000314:exon5:c.275A>T:p.D92V,PTEN:NM_001304717:exon6:c.794A>T:p.D265V	-	-	-	-	-	-	-	-	-	-	-	-	-	-	-	-	-	-	-	-	-	-	-	-	-	-	-	-	-	-	-	-	-	-	endometrium	2
10	89692791	89692791	A	G	exonic	PTEN	-	nonsynonymous SNV	PTEN:NM_000314:exon5:c.275A>G:p.D92G,PTEN:NM_001304717:exon6:c.794A>G:p.D265G	-	-	-	-	-	-	-	-	-	-	-	-	-	-	-	-	-	-	-	-	-	-	-	-	-	-	-	-	-	-	-	-	-	-	endometrium	1
19	38993258	38993258	G	A	exonic	RYR1	-	nonsynonymous SNV	RYR1:NM_000540:exon48:c.7726G>A:p.A2576T,RYR1:NM_001042723:exon48:c.7726G>A:p.A2576T	1.198e-05	6.54e-05	1.475e-05	8.71e-06	1.193e-05	6.18e-05	6.54e-05	0	0	0	0	0	0	6.54e-05	6.542e-05	6.733e-05	0.0001	-	-	-	-	-	-	-	-	-	-	-	-	-	-	-	-	-	endometrium	3
17	7578271	7578271	T	C	exonic	TP53	-	nonsynonymous SNV	TP53:NM_001126115:exon2:c.182A>G:p.H61R,TP53:NM_001126116:exon2:c.182A>G:p.H61R,TP53:NM_001126117:exon2:c.182A>G:p.H61R,TP53:NM_001276697:exon2:c.101A>G:p.H34R,TP53:NM_001276698:exon2:c.101A>G:p.H34R,TP53:NM_001276699:exon2:c.101A>G:p.H34R,TP53:NM_001126118:exon5:c.461A>G:p.H154R,TP53:NM_000546:exon6:c.578A>G:p.H193R,TP53:NM_001126112:exon6:c.578A>G:p.H193R,TP53:NM_001126113:exon6:c.578A>G:p.H193…	-	-	-	-	-	-	-	-	-	-	-	-	-	-	-	-	-	-	-	-	-	-	-	-	-	-	-	-	-	-	-	-	-	-	endometrium	2
17	7578271	7578271	T	G	exonic	TP53	-	nonsynonymous SNV	TP53:NM_001126115:exon2:c.182A>C:p.H61P,TP53:NM_001126116:exon2:c.182A>C:p.H61P,TP53:NM_001126117:exon2:c.182A>C:p.H61P,TP53:NM_001276697:exon2:c.101A>C:p.H34P,TP53:NM_001276698:exon2:c.101A>C:p.H34P,TP53:NM_001276699:exon2:c.101A>C:p.H34P,TP53:NM_001126118:exon5:c.461A>C:p.H154P,TP53:NM_000546:exon6:c.578A>C:p.H193P,TP53:NM_001126112:exon6:c.578A>C:p.H193P,TP53:NM_001126113:exon6:c.578A>C:p.H193…	-	-	-	-	-	-	-	-	-	-	-	-	-	-	-	-	-	-	-	-	-	-	-	-	-	-	-	-	-	-	-	-	-	-	endometrium	1
12	133250289	133250289	C	A	exonic	POLE	-	nonsynonymous SNV	POLE:NM_006231:exon13:c.1231G>T:p.V411L	-	-	-	-	-	-	-	-	-	-	-	-	-	-	-	-	-	-	-	-	-	-	-	-	-	-	-	-	-	-	-	-	-	-	endometrium	3
14	20248736	20248736	C	A	exonic	OR4M1	-	nonsynonymous SNV	OR4M1:NM_001005500:exon1:c.255C>A:p.F85L	-	-	-	-	-	-	-	-	-	-	-	-	-	-	-	-	-	-	-	-	-	-	-	-	-	-	-	-	-	-	-	-	-	-	endometrium	3
19	22271727	22271727	G	T	exonic	ZNF257	-	nonsynonymous SNV	ZNF257:NM_001316998:exon2:c.947G>T:p.R316I,ZNF257:NM_033468:exon4:c.1175G>T:p.R392I,ZNF257:NM_001316996:exon5:c.1079G>T:p.R360I,ZNF257:NM_001316997:exon5:c.947G>T:p.R316I	-	-	-	-	-	-	-	-	-	-	-	-	-	-	-	-	-	0	.	0	0	0.0003	0	.	0	0	0	0	0	0	.	.	.	.	endometrium	3
3	41266137	41266137	C	T	exonic	CTNNB1	-	nonsynonymous SNV	CTNNB1:NM_001098209:exon3:c.134C>T:p.S45F,CTNNB1:NM_001098210:exon3:c.134C>T:p.S45F,CTNNB1:NM_001904:exon3:c.134C>T:p.S45F,CTNNB1:NM_001330729:exon4:c.113C>T:p.S38F	-	-	-	-	-	-	-	-	-	-	-	-	-	-	-	-	-	-	-	-	-	-	-	-	-	-	-	-	-	-	-	-	-	-	endometrium	2
3	41266137	41266137	C	G	exonic	CTNNB1	-	nonsynonymous SNV	CTNNB1:NM_001098209:exon3:c.134C>G:p.S45C,CTNNB1:NM_001098210:exon3:c.134C>G:p.S45C,CTNNB1:NM_001904:exon3:c.134C>G:p.S45C,CTNNB1:NM_001330729:exon4:c.113C>G:p.S38C	-	-	-	-	-	-	-	-	-	-	-	-	-	-	-	-	-	-	-	-	-	-	-	-	-	-	-	-	-	-	-	-	-	-	endometrium	1
1	115258747	115258747	C	T	exonic	NRAS	-	nonsynonymous SNV	NRAS:NM_002524:exon2:c.35G>A:p.G12D	7.953e-06	8.79e-06	0	1.731e-05	2.386e-05	0	0	0	0	8.79e-06	4.619e-05	0	0	.	1.117e-05	9.733e-06	.	-	-	-	-	-	-	-	-	-	-	-	-	-	-	-	-	-	endometrium	3
12	6700658	6700658	C	T	exonic	CHD4	-	nonsynonymous SNV	CHD4:NM_001297553:exon21:c.3293G>A:p.R1098Q,CHD4:NM_001273:exon22:c.3314G>A:p.R1105Q,CHD4:NM_001363606:exon22:c.3275G>A:p.R1092Q	-	-	-	-	-	-	-	-	-	-	-	-	-	-	-	-	-	-	-	-	-	-	-	-	-	-	-	-	-	-	-	-	-	-	endometrium	2
12	6700658	6700658	C	A	exonic	CHD4	-	nonsynonymous SNV	CHD4:NM_001297553:exon21:c.3293G>T:p.R1098L,CHD4:NM_001273:exon22:c.3314G>T:p.R1105L,CHD4:NM_001363606:exon22:c.3275G>T:p.R1092L	-	-	-	-	-	-	-	-	-	-	-	-	-	-	-	-	-	-	-	-	-	-	-	-	-	-	-	-	-	-	-	-	-	-	endometrium	1
1	13747459	13747459	G	A	exonic	PRAMEF20	-	nonsynonymous SNV	PRAMEF20:NM_001099852:exon4:c.1154G>A:p.R385H	-	-	-	-	-	-	-	-	-	-	-	-	-	-	-	-	-	-	-	-	-	-	-	-	-	-	-	-	-	-	-	-	-	-	endometrium	3
17	38245533	38245533	G	A	exonic	THRA	-	nonsynonymous SNV	THRA:NM_001190918:exon9:c.1057G>A:p.V353I,THRA:NM_001190919:exon9:c.1057G>A:p.V353I,THRA:NM_003250:exon9:c.1057G>A:p.V353I,THRA:NM_199334:exon9:c.1057G>A:p.V353I	2.386e-05	5.275e-05	7.358e-06	4.327e-05	2.386e-05	0	0	0	0	5.275e-05	0	0	0	5.374e-05	5.585e-05	4.867e-05	4.676e-05	3.186e-05	6.485e-05	0	7.185e-05	3.183e-05	0	.	0	0	6.485e-05	0	0	0	9.025e-05	7.348e-05	.	.	endometrium	3
17	7578235	7578235	T	C	exonic	TP53	-	nonsynonymous SNV	TP53:NM_001126115:exon2:c.218A>G:p.Y73C,TP53:NM_001126116:exon2:c.218A>G:p.Y73C,TP53:NM_001126117:exon2:c.218A>G:p.Y73C,TP53:NM_001276697:exon2:c.137A>G:p.Y46C,TP53:NM_001276698:exon2:c.137A>G:p.Y46C,TP53:NM_001276699:exon2:c.137A>G:p.Y46C,TP53:NM_001126118:exon5:c.497A>G:p.Y166C,TP53:NM_000546:exon6:c.614A>G:p.Y205C,TP53:NM_001126112:exon6:c.614A>G:p.Y205C,TP53:NM_001126113:exon6:c.614A>G:p.Y205…	-	-	-	-	-	-	-	-	-	-	-	-	-	-	-	-	-	-	-	-	-	-	-	-	-	-	-	-	-	-	-	-	-	-	endometrium	3
19	52716326	52716326	G	T	exonic	PPP2R1A	-	nonsynonymous SNV	PPP2R1A:NM_001363656:exon6:c.233G>T:p.W78L,PPP2R1A:NM_014225:exon6:c.770G>T:p.W257L	-	-	-	-	-	-	-	-	-	-	-	-	-	-	-	-	-	-	-	-	-	-	-	-	-	-	-	-	-	-	-	-	-	-	endometrium	3
11	69466021	69466021	C	T	exonic	CCND1	-	nonsynonymous SNV	CCND1:NM_053056:exon5:c.859C>T:p.P287S	-	-	-	-	-	-	-	-	-	-	-	-	-	-	-	-	-	-	-	-	-	-	-	-	-	-	-	-	-	-	-	-	-	-	endometrium	2
11	69466021	69466021	C	A	exonic	CCND1	-	nonsynonymous SNV	CCND1:NM_053056:exon5:c.859C>A:p.P287T	-	-	-	-	-	-	-	-	-	-	-	-	-	-	-	-	-	-	-	-	-	-	-	-	-	-	-	-	-	-	-	-	-	-	endometrium	1
2	178098804	178098804	C	T	exonic	NFE2L2	-	nonsynonymous SNV	NFE2L2:NM_001145412:exon2:c.193G>A:p.G65S,NFE2L2:NM_001145413:exon2:c.193G>A:p.G65S,NFE2L2:NM_001313900:exon2:c.193G>A:p.G65S,NFE2L2:NM_001313901:exon2:c.193G>A:p.G65S,NFE2L2:NM_001313902:exon2:c.241G>A:p.G81S,NFE2L2:NM_006164:exon2:c.241G>A:p.G81S	-	-	-	-	-	-	-	-	-	-	-	-	-	-	-	-	-	-	-	-	-	-	-	-	-	-	-	-	-	-	-	-	-	-	endometrium	2
2	178098804	178098804	C	A	exonic	NFE2L2	-	nonsynonymous SNV	NFE2L2:NM_001145412:exon2:c.193G>T:p.G65C,NFE2L2:NM_001145413:exon2:c.193G>T:p.G65C,NFE2L2:NM_001313900:exon2:c.193G>T:p.G65C,NFE2L2:NM_001313901:exon2:c.193G>T:p.G65C,NFE2L2:NM_001313902:exon2:c.241G>T:p.G81C,NFE2L2:NM_001313904:exon2:c.12G>T:p.Q4H,NFE2L2:NM_006164:exon2:c.241G>T:p.G81C	-	-	-	-	-	-	-	-	-	-	-	-	-	-	-	-	-	-	-	-	-	-	-	-	-	-	-	-	-	-	-	-	-	-	endometrium	1
10	124457811	124457811	G	A	exonic	C10orf120	-	nonsynonymous SNV	C10orf120:NM_001010912:exon3:c.446C>T:p.A149V	6.76e-05	0.0003	3.679e-05	0.0001	7.157e-05	0	0	0.0003	5.437e-05	6.153e-05	0	0	0	0.0003	0.0003	0.0003	0.0004	6.369e-05	0.0006	0.0001	0	6.366e-05	0	.	0	0.0006	6.482e-05	0	0	0	0.0007	0.0006	.	0.0011	endometrium	3
10	89692896	89692896	G	T	exonic	PTEN	-	nonsynonymous SNV	PTEN:NM_000314:exon5:c.380G>T:p.G127V,PTEN:NM_001304717:exon6:c.899G>T:p.G300V	-	-	-	-	-	-	-	-	-	-	-	-	-	-	-	-	-	-	-	-	-	-	-	-	-	-	-	-	-	-	-	-	-	-	endometrium	3
5	140712338	140712338	C	T	exonic	PCDHGA1	-	nonsynonymous SNV	PCDHGA1:NM_018912:exon1:c.2087C>T:p.A696V,PCDHGA1:NM_031993:exon1:c.2087C>T:p.A696V	-	-	-	-	-	-	-	-	-	-	-	-	-	-	-	-	-	-	-	-	-	-	-	-	-	-	-	-	-	-	-	-	-	-	endometrium	3
3	178916944	178916944	A	G	exonic	PIK3CA	-	nonsynonymous SNV	PIK3CA:NM_006218:exon2:c.331A>G:p.K111E	-	-	-	-	-	-	-	-	-	-	-	-	-	-	-	-	-	-	-	-	-	-	-	-	-	-	-	-	-	-	-	-	-	-	endometrium	3
2	158617533	158617533	G	A	exonic	ACVR1	-	nonsynonymous SNV	ACVR1:NM_001105:exon9:c.1123C>T:p.R375C,ACVR1:NM_001111067:exon9:c.1123C>T:p.R375C,ACVR1:NM_001347663:exon9:c.1123C>T:p.R375C,ACVR1:NM_001347664:exon10:c.1123C>T:p.R375C,ACVR1:NM_001347665:exon10:c.1123C>T:p.R375C,ACVR1:NM_001347666:exon10:c.1123C>T:p.R375C,ACVR1:NM_001347667:exon10:c.1123C>T:p.R375C	7.965e-06	1.762e-05	7.369e-06	8.666e-06	7.953e-06	0	0	0	0	1.762e-05	0	0	0	1.795e-05	1.117e-05	1.951e-05	2.339e-05	-	-	-	-	-	-	-	-	-	-	-	-	-	-	-	-	-	endometrium	3
17	7578479	7578479	G	A	exonic	TP53	-	nonsynonymous SNV	TP53:NM_001126115:exon1:c.55C>T:p.P19S,TP53:NM_001126116:exon1:c.55C>T:p.P19S,TP53:NM_001126117:exon1:c.55C>T:p.P19S,TP53:NM_001126118:exon4:c.334C>T:p.P112S,TP53:NM_000546:exon5:c.451C>T:p.P151S,TP53:NM_001126112:exon5:c.451C>T:p.P151S,TP53:NM_001126113:exon5:c.451C>T:p.P151S,TP53:NM_001126114:exon5:c.451C>T:p.P151S,TP53:NM_001276695:exon5:c.334C>T:p.P112S,TP53:NM_001276696:exon5:c.334C>T:p.P112…	-	-	-	-	-	-	-	-	-	-	-	-	-	-	-	-	-	-	-	-	-	-	-	-	-	-	-	-	-	-	-	-	-	-	endometrium	3
15	89074021	89074021	G	A	exonic	DET1	-	nonsynonymous SNV	DET1:NM_001144074:exon2:c.916C>T:p.R306W,DET1:NM_001321596:exon3:c.916C>T:p.R306W,DET1:NM_017996:exon3:c.949C>T:p.R317W,DET1:NM_001321594:exon4:c.814C>T:p.R272W	2.01e-05	6.545e-05	1.482e-05	2.637e-05	2e-05	6.467e-05	6.545e-05	0	5.566e-05	8.872e-06	0	0	0	8.82e-05	7.698e-05	7.086e-05	0.0001	-	-	-	-	-	-	-	-	-	-	-	-	-	-	-	-	-	endometrium	3
5	67591106	67591106	A	G	exonic	PIK3R1	-	nonsynonymous SNV	PIK3R1:NM_001242466:exon6:c.610A>G:p.K204E,PIK3R1:NM_181504:exon7:c.889A>G:p.K297E,PIK3R1:NM_181524:exon7:c.799A>G:p.K267E,PIK3R1:NM_181523:exon13:c.1699A>G:p.K567E	-	-	-	-	-	-	-	-	-	-	-	-	-	-	-	-	-	-	-	-	-	-	-	-	-	-	-	-	-	-	-	-	-	-	endometrium	3
10	50966551	50966551	G	A	exonic	OGDHL	-	nonsynonymous SNV	OGDHL:NM_001143996:exon2:c.88C>T:p.R30C,OGDHL:NM_001347819:exon2:c.88C>T:p.R30C,OGDHL:NM_001347820:exon2:c.88C>T:p.R30C,OGDHL:NM_001347823:exon2:c.88C>T:p.R30C,OGDHL:NM_001347824:exon2:c.88C>T:p.R30C,OGDHL:NM_018245:exon2:c.88C>T:p.R30C	1.594e-05	6.534e-05	1.473e-05	1.737e-05	1.591e-05	6.17e-05	6.534e-05	0	0	0	4.654e-05	0	0	8.34e-05	6.536e-05	6.72e-05	0.0001	-	-	-	-	-	-	-	-	-	-	-	-	-	-	-	-	-	endometrium	3
11	35685117	35685117	C	T	exonic	TRIM44	-	nonsynonymous SNV	TRIM44:NM_017583:exon1:c.458C>T:p.A153V	1.992e-05	3.525e-05	2.211e-05	1.734e-05	1.988e-05	0	0	0	0	3.525e-05	0	0	0.0002	3.591e-05	2.239e-05	3.9e-05	2.342e-05	-	-	-	-	-	-	-	-	-	-	-	-	-	-	-	-	-	endometrium	3
4	153244092	153244092	G	A	exonic	FBXW7	-	nonsynonymous SNV	FBXW7:NM_001013415:exon11:c.1711C>T:p.R571W,FBXW7:NM_018315:exon11:c.1825C>T:p.R609W,FBXW7:NM_033632:exon12:c.2065C>T:p.R689W,FBXW7:NM_001349798:exon14:c.2065C>T:p.R689W	-	-	-	-	-	-	-	-	-	-	-	-	-	-	-	-	-	-	-	-	-	-	-	-	-	-	-	-	-	-	-	-	-	-	endometrium	3
17	7578403	7578403	C	T	exonic	TP53	-	nonsynonymous SNV	TP53:NM_001126115:exon1:c.131G>A:p.C44Y,TP53:NM_001126116:exon1:c.131G>A:p.C44Y,TP53:NM_001126117:exon1:c.131G>A:p.C44Y,TP53:NM_001276697:exon1:c.50G>A:p.C17Y,TP53:NM_001276698:exon1:c.50G>A:p.C17Y,TP53:NM_001276699:exon1:c.50G>A:p.C17Y,TP53:NM_001126118:exon4:c.410G>A:p.C137Y,TP53:NM_000546:exon5:c.527G>A:p.C176Y,TP53:NM_001126112:exon5:c.527G>A:p.C176Y,TP53:NM_001126113:exon5:c.527G>A:p.C176Y,T…	-	-	-	-	-	-	-	-	-	-	-	-	-	-	-	-	-	-	-	-	-	-	-	-	-	-	-	-	-	-	-	-	-	-	endometrium	3
8	128752960	128752960	A	G	exonic	MYC	-	nonsynonymous SNV	MYC:NM_001354870:exon3:c.1118A>G:p.H373R,MYC:NM_002467:exon3:c.1121A>G:p.H374R	-	-	-	-	-	-	-	-	-	-	-	-	-	-	-	-	-	-	-	-	-	-	-	-	-	-	-	-	-	-	-	-	-	-	endometrium	3
12	25398282	25398282	C	A	exonic	KRAS	-	nonsynonymous SNV	KRAS:NM_001369786:exon2:c.37G>T:p.G13C,KRAS:NM_001369787:exon2:c.37G>T:p.G13C,KRAS:NM_004985:exon2:c.37G>T:p.G13C,KRAS:NM_033360:exon2:c.37G>T:p.G13C	0	.	0	0	7.953e-06	0	0	0	0	0	0	0	0	.	.	.	.	-	-	-	-	-	-	-	-	-	-	-	-	-	-	-	-	-	endometrium	3
17	7578508	7578508	C	T	exonic	TP53	-	nonsynonymous SNV	TP53:NM_001126115:exon1:c.26G>A:p.C9Y,TP53:NM_001126116:exon1:c.26G>A:p.C9Y,TP53:NM_001126117:exon1:c.26G>A:p.C9Y,TP53:NM_001126118:exon4:c.305G>A:p.C102Y,TP53:NM_000546:exon5:c.422G>A:p.C141Y,TP53:NM_001126112:exon5:c.422G>A:p.C141Y,TP53:NM_001126113:exon5:c.422G>A:p.C141Y,TP53:NM_001126114:exon5:c.422G>A:p.C141Y,TP53:NM_001276695:exon5:c.305G>A:p.C102Y,TP53:NM_001276696:exon5:c.305G>A:p.C102Y,T…	-	-	-	-	-	-	-	-	-	-	-	-	-	-	-	-	-	-	-	-	-	-	-	-	-	-	-	-	-	-	-	-	-	-	endometrium	3
10	89692911	89692911	G	A	exonic	PTEN	-	nonsynonymous SNV	PTEN:NM_000314:exon5:c.395G>A:p.G132D,PTEN:NM_001304717:exon6:c.914G>A:p.G305D	-	-	-	-	-	-	-	-	-	-	-	-	-	-	-	-	-	-	-	-	-	-	-	-	-	-	-	-	-	-	-	-	-	-	endometrium	3
17	47699360	47699360	C	T	exonic	SPOP	-	nonsynonymous SNV	SPOP:NM_001007228:exon3:c.148G>A:p.E50K,SPOP:NM_001370731:exon3:c.148G>A:p.E50K,SPOP:NM_001370732:exon3:c.148G>A:p.E50K,SPOP:NM_001007227:exon4:c.148G>A:p.E50K,SPOP:NM_001007229:exon4:c.148G>A:p.E50K,SPOP:NM_001370730:exon4:c.148G>A:p.E50K,SPOP:NM_003563:exon4:c.148G>A:p.E50K,SPOP:NM_001007226:exon5:c.148G>A:p.E50K,SPOP:NM_001007230:exon5:c.148G>A:p.E50K	-	-	-	-	-	-	-	-	-	-	-	-	-	-	-	-	-	-	-	-	-	-	-	-	-	-	-	-	-	-	-	-	-	-	endometrium	3
17	37879658	37879658	G	A	exonic	ERBB2	-	nonsynonymous SNV	ERBB2:NM_001289937:exon17:c.2033G>A:p.R678Q,ERBB2:NM_004448:exon17:c.2033G>A:p.R678Q,ERBB2:NM_001005862:exon20:c.1943G>A:p.R648Q,ERBB2:NM_001289936:exon21:c.1988G>A:p.R663Q	-	-	-	-	-	-	-	-	-	-	-	-	-	-	-	-	-	-	-	-	-	-	-	-	-	-	-	-	-	-	-	-	-	-	endometrium	3
17	7577551	7577551	C	T	exonic	TP53	-	nonsynonymous SNV	TP53:NM_001126115:exon3:c.334G>A:p.G112S,TP53:NM_001126116:exon3:c.334G>A:p.G112S,TP53:NM_001126117:exon3:c.334G>A:p.G112S,TP53:NM_001276697:exon3:c.253G>A:p.G85S,TP53:NM_001276698:exon3:c.253G>A:p.G85S,TP53:NM_001276699:exon3:c.253G>A:p.G85S,TP53:NM_001126118:exon6:c.613G>A:p.G205S,TP53:NM_000546:exon7:c.730G>A:p.G244S,TP53:NM_001126112:exon7:c.730G>A:p.G244S,TP53:NM_001126113:exon7:c.730G>A:p.G…	-	-	-	-	-	-	-	-	-	-	-	-	-	-	-	-	-	-	-	-	-	-	-	-	-	-	-	-	-	-	-	-	-	-	endometrium	2
17	7577551	7577551	C	A	exonic	TP53	-	nonsynonymous SNV	TP53:NM_001126115:exon3:c.334G>T:p.G112C,TP53:NM_001126116:exon3:c.334G>T:p.G112C,TP53:NM_001126117:exon3:c.334G>T:p.G112C,TP53:NM_001276697:exon3:c.253G>T:p.G85C,TP53:NM_001276698:exon3:c.253G>T:p.G85C,TP53:NM_001276699:exon3:c.253G>T:p.G85C,TP53:NM_001126118:exon6:c.613G>T:p.G205C,TP53:NM_000546:exon7:c.730G>T:p.G244C,TP53:NM_001126112:exon7:c.730G>T:p.G244C,TP53:NM_001126113:exon7:c.730G>T:p.G…	-	-	-	-	-	-	-	-	-	-	-	-	-	-	-	-	-	-	-	-	-	-	-	-	-	-	-	-	-	-	-	-	-	-	endometrium	1
10	89711875	89711875	G	A	exonic	PTEN	-	nonsynonymous SNV	PTEN:NM_000314:exon6:c.493G>A:p.G165R,PTEN:NM_001304717:exon7:c.1012G>A:p.G338R	-	-	-	-	-	-	-	-	-	-	-	-	-	-	-	-	-	-	-	-	-	-	-	-	-	-	-	-	-	-	-	-	-	-	endometrium	3
21	33044112	33044112	C	T	exonic	SCAF4	-	nonsynonymous SNV	SCAF4:NM_001145444:exon19:c.2999G>A:p.R1000Q,SCAF4:NM_001145445:exon20:c.2978G>A:p.R993Q,SCAF4:NM_020706:exon20:c.3044G>A:p.R1015Q	3.976e-06	2.891e-05	0	8.653e-06	3.976e-06	0	0	2.891e-05	0	0	0	0	0	2.902e-05	3.276e-05	2.919e-05	.	-	-	-	-	-	-	-	-	-	-	-	-	-	-	-	-	-	endometrium	3
2	27465263	27465263	C	T	exonic	CAD	-	nonsynonymous SNV	CAD:NM_001306079:exon39:c.6001C>T:p.R2001C,CAD:NM_004341:exon40:c.6190C>T:p.R2064C	-	-	-	-	-	-	-	-	-	-	-	-	-	-	-	-	-	-	-	-	-	-	-	-	-	-	-	-	-	-	-	-	-	-	endometrium	3
5	140753951	140753951	C	T	exonic	PCDHGA6	-	nonsynonymous SNV	PCDHGA6:NM_018919:exon1:c.301C>T:p.R101W,PCDHGA6:NM_032086:exon1:c.301C>T:p.R101W	-	-	-	-	-	-	-	-	-	-	-	-	-	-	-	-	-	-	-	-	-	-	-	-	-	-	-	-	-	-	-	-	-	-	endometrium	3
8	41791093	41791093	C	T	exonic	KAT6A	-	nonsynonymous SNV	KAT6A:NM_006766:exon17:c.4645G>A:p.G1549S	-	-	-	-	-	-	-	-	-	-	-	-	-	-	-	-	-	-	-	-	-	-	-	-	-	-	-	-	-	-	-	-	-	-	endometrium	3
10	89692792	89692792	C	G	exonic	PTEN	-	nonsynonymous SNV	PTEN:NM_000314:exon5:c.276C>G:p.D92E,PTEN:NM_001304717:exon6:c.795C>G:p.D265E	-	-	-	-	-	-	-	-	-	-	-	-	-	-	-	-	-	-	-	-	-	-	-	-	-	-	-	-	-	-	-	-	-	-	endometrium	2
10	89692792	89692792	C	A	exonic	PTEN	-	nonsynonymous SNV	PTEN:NM_000314:exon5:c.276C>A:p.D92E,PTEN:NM_001304717:exon6:c.795C>A:p.D265E	-	-	-	-	-	-	-	-	-	-	-	-	-	-	-	-	-	-	-	-	-	-	-	-	-	-	-	-	-	-	-	-	-	-	endometrium	1
17	15234553	15234553	G	A	exonic	TEKT3	-	nonsynonymous SNV	TEKT3:NM_031898:exon3:c.350C>T:p.S117L	1.591e-05	6.152e-05	1.472e-05	1.731e-05	1.59e-05	6.152e-05	0	2.891e-05	0	1.759e-05	0	0	0	2.902e-05	6.166e-05	6.711e-05	2.338e-05	-	-	-	-	-	-	-	-	-	-	-	-	-	-	-	-	-	endometrium	3
2	198265007	198265007	C	T	exonic	SF3B1	-	nonsynonymous SNV	SF3B1:NM_012433:exon19:c.2870G>A:p.R957Q	3.981e-06	.	7.366e-06	0	3.976e-06	0	0	0	0	0	0	9.929e-05	0	.	.	.	.	-	-	-	-	-	-	-	-	-	-	-	-	-	-	-	-	-	endometrium	3
10	89692923	89692923	G	T	exonic	PTEN	-	nonsynonymous SNV	PTEN:NM_000314:exon5:c.407G>T:p.C136F,PTEN:NM_001304717:exon6:c.926G>T:p.C309F	-	-	-	-	-	-	-	-	-	-	-	-	-	-	-	-	-	-	-	-	-	-	-	-	-	-	-	-	-	-	-	-	-	-	endometrium	2
10	89692923	89692923	G	A	exonic	PTEN	-	nonsynonymous SNV	PTEN:NM_000314:exon5:c.407G>A:p.C136Y,PTEN:NM_001304717:exon6:c.926G>A:p.C309Y	-	-	-	-	-	-	-	-	-	-	-	-	-	-	-	-	-	-	-	-	-	-	-	-	-	-	-	-	-	-	-	-	-	-	endometrium	1
1	207498083	207498083	G	A	exonic	CD55	-	nonsynonymous SNV	CD55:NM_000574:exon3:c.466G>A:p.E156K,CD55:NM_001114752:exon3:c.466G>A:p.E156K,CD55:NM_001300902:exon3:c.466G>A:p.E156K,CD55:NM_001300903:exon3:c.466G>A:p.E156K,CD55:NM_001300904:exon3:c.466G>A:p.E156K	-	-	-	-	-	-	-	-	-	-	-	-	-	-	-	-	-	-	-	-	-	-	-	-	-	-	-	-	-	-	-	-	-	-	endometrium	3
1	227843477	227843477	G	T	exonic	ZNF678	-	nonsynonymous SNV	ZNF678:NM_001367911:exon3:c.1598G>T:p.R533I,ZNF678:NM_001367909:exon4:c.1526G>T:p.R509I,ZNF678:NM_178549:exon4:c.1691G>T:p.R564I,ZNF678:NM_001367910:exon5:c.1526G>T:p.R509I	4.208e-06	9.153e-06	0	9.157e-06	7.958e-06	0	0	0	0	9.153e-06	0	0	0	9.328e-06	1.169e-05	1.017e-05	.	-	-	-	-	-	-	-	-	-	-	-	-	-	-	-	-	-	endometrium	3
17	56281654	56281654	G	A	exonic	EPX	-	nonsynonymous SNV	EPX:NM_000502:exon12:c.2018G>A:p.R673Q	3.976e-06	8.79e-06	0	8.653e-06	3.976e-06	0	0	0	0	8.79e-06	0	0	0	8.954e-06	1.117e-05	.	.	3.184e-05	.	5.722e-05	0	3.183e-05	0	.	0	0	0	0.0003	0	0	.	.	.	.	endometrium	3
4	151114356	151114356	C	T	exonic	DCLK2	-	nonsynonymous SNV	DCLK2:NM_001040260:exon3:c.823C>T:p.R275C,DCLK2:NM_001040261:exon3:c.823C>T:p.R275C	-	-	-	-	-	-	-	-	-	-	-	-	-	-	-	-	-	-	-	-	-	-	-	-	-	-	-	-	-	-	-	-	-	-	endometrium	3
14	65544747	65544747	C	T	exonic	MAX	-	nonsynonymous SNV	MAX:NM_145112:exon3:c.152G>A:p.R51Q,MAX:NM_002382:exon4:c.179G>A:p.R60Q,MAX:NM_145113:exon4:c.179G>A:p.R60Q	-	-	-	-	-	-	-	-	-	-	-	-	-	-	-	-	-	-	-	-	-	-	-	-	-	-	-	-	-	-	-	-	-	-	endometrium	3
11	85435915	85435915	C	T	exonic	SYTL2	-	nonsynonymous SNV	SYTL2:NM_206927:exon8:c.4486G>A:p.E1496K,SYTL2:NM_206928:exon8:c.4483G>A:p.E1495K	3.584e-05	0.0003	4.421e-05	2.6e-05	3.579e-05	0	6.54e-05	2.894e-05	0.0003	8.809e-06	0	0	0	0.0003	0.0004	0.0003	0.0004	-	-	-	-	-	-	-	-	-	-	-	-	-	-	-	-	-	endometrium	3
1	197404099	197404099	G	A	exonic	CRB1	-	nonsynonymous SNV	CRB1:NM_001193640:exon7:c.2770G>A:p.E924K,CRB1:NM_201253:exon9:c.3106G>A:p.E1036K,CRB1:NM_001257965:exon12:c.3034G>A:p.E1012K	1.195e-05	5.794e-05	1.475e-05	8.668e-06	1.193e-05	0	0	5.794e-05	5.438e-05	0	0	0	0	5.817e-05	7.456e-05	5.85e-05	0.0001	-	-	-	-	-	-	-	-	-	-	-	-	-	-	-	-	-	endometrium	3
10	89692940	89692940	C	T	exonic	PTEN	-	nonsynonymous SNV	PTEN:NM_000314:exon5:c.424C>T:p.R142W,PTEN:NM_001304717:exon6:c.943C>T:p.R315W	3.978e-06	8.797e-06	0	8.658e-06	3.976e-06	0	0	0	0	8.797e-06	0	0	0	8.962e-06	1.117e-05	9.741e-06	2.339e-05	-	-	-	-	-	-	-	-	-	-	-	-	-	-	-	-	-	endometrium	3
19	18278070	18278070	A	G	exonic	PIK3R2	-	nonsynonymous SNV	PIK3R2:NM_005027:exon13:c.1690A>G:p.K564E	-	-	-	-	-	-	-	-	-	-	-	-	-	-	-	-	-	-	-	-	-	-	-	-	-	-	-	-	-	-	-	-	-	-	endometrium	3
3	178952085	178952085	A	G	exonic	PIK3CA	-	nonsynonymous SNV	PIK3CA:NM_006218:exon21:c.3140A>G:p.H1047R	4.028e-06	8.91e-06	0	8.802e-06	3.998e-06	0	0	0	0	8.91e-06	0	0	0	9.079e-06	1.123e-05	.	.	-	-	-	-	-	-	-	-	-	-	-	-	-	-	-	-	-	stomach	14
12	25398284	25398284	C	T	exonic	KRAS	-	nonsynonymous SNV	KRAS:NM_001369786:exon2:c.35G>A:p.G12D,KRAS:NM_001369787:exon2:c.35G>A:p.G12D,KRAS:NM_004985:exon2:c.35G>A:p.G12D,KRAS:NM_033360:exon2:c.35G>A:p.G12D	4.011e-06	8.883e-06	0	8.726e-06	1.988e-05	0	0	0	0	8.883e-06	0	0	0	9.051e-06	1.127e-05	9.832e-06	2.369e-05	-	-	-	-	-	-	-	-	-	-	-	-	-	-	-	-	-	stomach	10
12	25398284	25398284	C	A	exonic	KRAS	-	nonsynonymous SNV	KRAS:NM_001369786:exon2:c.35G>T:p.G12V,KRAS:NM_001369787:exon2:c.35G>T:p.G12V,KRAS:NM_004985:exon2:c.35G>T:p.G12V,KRAS:NM_033360:exon2:c.35G>T:p.G12V	0	.	0	0	3.976e-06	0	0	0	0	0	0	0	0	.	.	.	.	-	-	-	-	-	-	-	-	-	-	-	-	-	-	-	-	-	stomach	3
12	25398281	25398281	C	T	exonic	KRAS	-	nonsynonymous SNV	KRAS:NM_001369786:exon2:c.38G>A:p.G13D,KRAS:NM_001369787:exon2:c.38G>A:p.G13D,KRAS:NM_004985:exon2:c.38G>A:p.G13D,KRAS:NM_033360:exon2:c.38G>A:p.G13D	0	.	0	0	3.976e-06	0	0	0	0	0	0	0	0	.	.	.	.	-	-	-	-	-	-	-	-	-	-	-	-	-	-	-	-	-	stomach	11
17	7578406	7578406	C	T	exonic	TP53	-	nonsynonymous SNV	TP53:NM_001126115:exon1:c.128G>A:p.R43H,TP53:NM_001126116:exon1:c.128G>A:p.R43H,TP53:NM_001126117:exon1:c.128G>A:p.R43H,TP53:NM_001276697:exon1:c.47G>A:p.R16H,TP53:NM_001276698:exon1:c.47G>A:p.R16H,TP53:NM_001276699:exon1:c.47G>A:p.R16H,TP53:NM_001126118:exon4:c.407G>A:p.R136H,TP53:NM_000546:exon5:c.524G>A:p.R175H,TP53:NM_001126112:exon5:c.524G>A:p.R175H,TP53:NM_001126113:exon5:c.524G>A:p.R175H,T…	3.98e-06	8.803e-06	7.362e-06	0	3.976e-06	0	0	0	0	8.803e-06	0	0	0	8.968e-06	1.118e-05	9.747e-06	.	-	-	-	-	-	-	-	-	-	-	-	-	-	-	-	-	-	stomach	11
8	88365898	88365898	T	C	exonic	CNBD1	-	nonsynonymous SNV	CNBD1:NM_173538:exon10:c.1187T>C:p.L396P	-	-	-	-	-	-	-	-	-	-	-	-	-	-	-	-	-	-	-	-	-	-	-	-	-	-	-	-	-	-	-	-	-	-	stomach	6
8	88365898	88365898	T	G	exonic	CNBD1	-	nonsynonymous SNV	CNBD1:NM_173538:exon10:c.1187T>G:p.L396R	-	-	-	-	-	-	-	-	-	-	-	-	-	-	-	-	-	-	-	-	-	-	-	-	-	-	-	-	-	-	-	-	-	-	stomach	3
8	88365898	88365898	T	A	exonic	CNBD1	-	nonsynonymous SNV	CNBD1:NM_173538:exon10:c.1187T>A:p.L396H	-	-	-	-	-	-	-	-	-	-	-	-	-	-	-	-	-	-	-	-	-	-	-	-	-	-	-	-	-	-	-	-	-	-	stomach	1
3	178936091	178936091	G	A	exonic	PIK3CA	-	nonsynonymous SNV	PIK3CA:NM_006218:exon10:c.1633G>A:p.E545K	4.032e-06	8.879e-06	0	8.821e-06	4.004e-06	0	0	0	0	8.879e-06	0	0	0	9.045e-06	1.127e-05	.	.	-	-	-	-	-	-	-	-	-	-	-	-	-	-	-	-	-	stomach	10
12	56478854	56478854	G	A	exonic	ERBB3	-	nonsynonymous SNV	ERBB3:NM_001005915:exon3:c.310G>A:p.V104M,ERBB3:NM_001982:exon3:c.310G>A:p.V104M	-	-	-	-	-	-	-	-	-	-	-	-	-	-	-	-	-	-	-	-	-	-	-	-	-	-	-	-	-	-	-	-	-	-	stomach	8
12	56478854	56478854	G	T	exonic	ERBB3	-	nonsynonymous SNV	ERBB3:NM_001005915:exon3:c.310G>T:p.V104L,ERBB3:NM_001982:exon3:c.310G>T:p.V104L	-	-	-	-	-	-	-	-	-	-	-	-	-	-	-	-	-	-	-	-	-	-	-	-	-	-	-	-	-	-	-	-	-	-	stomach	1
4	153249385	153249385	G	A	exonic	FBXW7	-	nonsynonymous SNV	FBXW7:NM_001013415:exon8:c.1039C>T:p.R347C,FBXW7:NM_018315:exon8:c.1153C>T:p.R385C,FBXW7:NM_033632:exon9:c.1393C>T:p.R465C,FBXW7:NM_001349798:exon11:c.1393C>T:p.R465C	4.325e-06	3.714e-05	7.969e-06	0	2.386e-05	0	3.714e-05	0	0	0	0	0	0	3.714e-05	3.715e-05	3.726e-05	7.169e-05	-	-	-	-	-	-	-	-	-	-	-	-	-	-	-	-	-	stomach	9
17	7577121	7577121	G	A	exonic	TP53	-	nonsynonymous SNV	TP53:NM_001126115:exon4:c.421C>T:p.R141C,TP53:NM_001126116:exon4:c.421C>T:p.R141C,TP53:NM_001126117:exon4:c.421C>T:p.R141C,TP53:NM_001276697:exon4:c.340C>T:p.R114C,TP53:NM_001276698:exon4:c.340C>T:p.R114C,TP53:NM_001276699:exon4:c.340C>T:p.R114C,TP53:NM_001126118:exon7:c.700C>T:p.R234C,TP53:NM_000546:exon8:c.817C>T:p.R273C,TP53:NM_001126112:exon8:c.817C>T:p.R273C,TP53:NM_001126113:exon8:c.817C>T:…	1.196e-05	5.443e-05	1.475e-05	8.679e-06	1.193e-05	0	0	0	5.443e-05	8.818e-06	4.631e-05	0	0	5.444e-05	7.459e-05	5.658e-05	.	0	.	0	0	3.183e-05	0	.	0	0	0	0	0	0	.	.	.	.	stomach	6
17	7577121	7577121	G	T	exonic	TP53	-	nonsynonymous SNV	TP53:NM_001126115:exon4:c.421C>A:p.R141S,TP53:NM_001126116:exon4:c.421C>A:p.R141S,TP53:NM_001126117:exon4:c.421C>A:p.R141S,TP53:NM_001276697:exon4:c.340C>A:p.R114S,TP53:NM_001276698:exon4:c.340C>A:p.R114S,TP53:NM_001276699:exon4:c.340C>A:p.R114S,TP53:NM_001126118:exon7:c.700C>A:p.R234S,TP53:NM_000546:exon8:c.817C>A:p.R273S,TP53:NM_001126112:exon8:c.817C>A:p.R273S,TP53:NM_001126113:exon8:c.817C>A:…	0	.	0	0	7.952e-06	0	0	0	0	0	0	0	0	.	.	.	.	-	-	-	-	-	-	-	-	-	-	-	-	-	-	-	-	-	stomach	1
3	178936082	178936082	G	A	exonic	PIK3CA	-	nonsynonymous SNV	PIK3CA:NM_006218:exon10:c.1624G>A:p.E542K	-	-	-	-	-	-	-	-	-	-	-	-	-	-	-	-	-	-	-	-	-	-	-	-	-	-	-	-	-	-	-	-	-	-	stomach	6
17	7577120	7577120	C	T	exonic	TP53	-	nonsynonymous SNV	TP53:NM_001126115:exon4:c.422G>A:p.R141H,TP53:NM_001126116:exon4:c.422G>A:p.R141H,TP53:NM_001126117:exon4:c.422G>A:p.R141H,TP53:NM_001276697:exon4:c.341G>A:p.R114H,TP53:NM_001276698:exon4:c.341G>A:p.R114H,TP53:NM_001276699:exon4:c.341G>A:p.R114H,TP53:NM_001126118:exon7:c.701G>A:p.R234H,TP53:NM_000546:exon8:c.818G>A:p.R273H,TP53:NM_001126112:exon8:c.818G>A:p.R273H,TP53:NM_001126113:exon8:c.818G>A:…	1.593e-05	2.643e-05	2.21e-05	8.671e-06	3.976e-05	0	0	0	0	2.643e-05	0	9.929e-05	0	2.692e-05	3.355e-05	2.925e-05	7.024e-05	-	-	-	-	-	-	-	-	-	-	-	-	-	-	-	-	-	stomach	6
1	158606546	158606546	T	G	exonic	SPTA1	-	nonsynonymous SNV	SPTA1:NM_003126:exon37:c.5195A>C:p.K1732T	8.022e-06	1.769e-05	1.479e-05	0	7.993e-06	0	0	0	0	1.769e-05	0	0	0	1.802e-05	2.244e-05	9.798e-06	.	3.185e-05	6.483e-05	0	7.184e-05	3.183e-05	0	.	0	0	6.483e-05	0	0	0	9.022e-05	7.344e-05	.	0.0002	stomach	6
17	7577094	7577094	G	A	exonic	TP53	-	nonsynonymous SNV	TP53:NM_001126115:exon4:c.448C>T:p.R150W,TP53:NM_001126116:exon4:c.448C>T:p.R150W,TP53:NM_001126117:exon4:c.448C>T:p.R150W,TP53:NM_001276697:exon4:c.367C>T:p.R123W,TP53:NM_001276698:exon4:c.367C>T:p.R123W,TP53:NM_001276699:exon4:c.367C>T:p.R123W,TP53:NM_001126118:exon7:c.727C>T:p.R243W,TP53:NM_000546:exon8:c.844C>T:p.R282W,TP53:NM_001126112:exon8:c.844C>T:p.R282W,TP53:NM_001126113:exon8:c.844C>T:…	3.978e-06	8.793e-06	0	8.655e-06	7.952e-06	0	0	0	0	8.793e-06	0	0	0	8.957e-06	1.117e-05	.	.	-	-	-	-	-	-	-	-	-	-	-	-	-	-	-	-	-	stomach	6
3	49412898	49412898	T	C	exonic	RHOA	-	nonsynonymous SNV	RHOA:NM_001313943:exon2:c.125A>G:p.Y42C,RHOA:NM_001313944:exon2:c.125A>G:p.Y42C,RHOA:NM_001313946:exon2:c.125A>G:p.Y42C,RHOA:NM_001313947:exon2:c.125A>G:p.Y42C,RHOA:NM_001664:exon2:c.125A>G:p.Y42C,RHOA:NM_001313941:exon3:c.125A>G:p.Y42C	-	-	-	-	-	-	-	-	-	-	-	-	-	-	-	-	-	-	-	-	-	-	-	-	-	-	-	-	-	-	-	-	-	-	stomach	3
3	49412898	49412898	T	G	exonic	RHOA	-	nonsynonymous SNV	RHOA:NM_001313943:exon2:c.125A>C:p.Y42S,RHOA:NM_001313944:exon2:c.125A>C:p.Y42S,RHOA:NM_001313946:exon2:c.125A>C:p.Y42S,RHOA:NM_001313947:exon2:c.125A>C:p.Y42S,RHOA:NM_001664:exon2:c.125A>C:p.Y42S,RHOA:NM_001313941:exon3:c.125A>C:p.Y42S	-	-	-	-	-	-	-	-	-	-	-	-	-	-	-	-	-	-	-	-	-	-	-	-	-	-	-	-	-	-	-	-	-	-	stomach	2
10	33209310	33209310	G	T	exonic	ITGB1	-	nonsynonymous SNV	ITGB1:NM_033668:exon9:c.1132C>A:p.L378I,ITGB1:NM_002211:exon10:c.1132C>A:p.L378I,ITGB1:NM_133376:exon10:c.1132C>A:p.L378I	-	-	-	-	-	-	-	-	-	-	-	-	-	-	-	-	-	-	-	-	-	-	-	-	-	-	-	-	-	-	-	-	-	-	stomach	5
17	7577538	7577538	C	T	exonic	TP53	-	nonsynonymous SNV	TP53:NM_001126115:exon3:c.347G>A:p.R116Q,TP53:NM_001126116:exon3:c.347G>A:p.R116Q,TP53:NM_001126117:exon3:c.347G>A:p.R116Q,TP53:NM_001276697:exon3:c.266G>A:p.R89Q,TP53:NM_001276698:exon3:c.266G>A:p.R89Q,TP53:NM_001276699:exon3:c.266G>A:p.R89Q,TP53:NM_001126118:exon6:c.626G>A:p.R209Q,TP53:NM_000546:exon7:c.743G>A:p.R248Q,TP53:NM_001126112:exon7:c.743G>A:p.R248Q,TP53:NM_001126113:exon7:c.743G>A:p.R…	1.193e-05	2.637e-05	7.358e-06	1.731e-05	2.386e-05	0	0	0	0	2.637e-05	0	0	0	2.687e-05	2.233e-05	1.947e-05	2.338e-05	-	-	-	-	-	-	-	-	-	-	-	-	-	-	-	-	-	stomach	5
1	158324361	158324361	T	G	exonic	CD1E	-	nonsynonymous SNV	CD1E:NM_001042583:exon2:c.253T>G:p.F85V,CD1E:NM_001042584:exon2:c.253T>G:p.F85V,CD1E:NM_001042585:exon2:c.253T>G:p.F85V,CD1E:NM_001185107:exon2:c.253T>G:p.F85V,CD1E:NM_001185108:exon2:c.253T>G:p.F85V,CD1E:NM_001185115:exon2:c.253T>G:p.F85V,CD1E:NM_030893:exon2:c.253T>G:p.F85V	-	-	-	-	-	-	-	-	-	-	-	-	-	-	-	-	-	-	-	-	-	-	-	-	-	-	-	-	-	-	-	-	-	-	stomach	4
1	158324361	158324361	T	C	exonic	CD1E	-	nonsynonymous SNV	CD1E:NM_001042583:exon2:c.253T>C:p.F85L,CD1E:NM_001042584:exon2:c.253T>C:p.F85L,CD1E:NM_001042585:exon2:c.253T>C:p.F85L,CD1E:NM_001185107:exon2:c.253T>C:p.F85L,CD1E:NM_001185108:exon2:c.253T>C:p.F85L,CD1E:NM_001185115:exon2:c.253T>C:p.F85L,CD1E:NM_030893:exon2:c.253T>C:p.F85L	-	-	-	-	-	-	-	-	-	-	-	-	-	-	-	-	-	-	-	-	-	-	-	-	-	-	-	-	-	-	-	-	-	-	stomach	1
7	74239465	74239465	A	G	exonic	GTF2IRD2	-	nonsynonymous SNV	GTF2IRD2:NM_001368300:exon4:c.841T>C:p.Y281H,GTF2IRD2:NM_173537:exon4:c.355T>C:p.Y119H	0.0004	0.0012	0.0003	0.0004	0.0007	0.0012	0.0008	0.0005	0.0003	0.0002	0	0	0.0004	0.0015	0.0012	0.0013	0.0012	-	-	-	-	-	-	-	-	-	-	-	-	-	-	-	-	-	stomach	5
17	7578403	7578403	C	A	exonic	TP53	-	nonsynonymous SNV	TP53:NM_001126115:exon1:c.131G>T:p.C44F,TP53:NM_001126116:exon1:c.131G>T:p.C44F,TP53:NM_001126117:exon1:c.131G>T:p.C44F,TP53:NM_001276697:exon1:c.50G>T:p.C17F,TP53:NM_001276698:exon1:c.50G>T:p.C17F,TP53:NM_001276699:exon1:c.50G>T:p.C17F,TP53:NM_001126118:exon4:c.410G>T:p.C137F,TP53:NM_000546:exon5:c.527G>T:p.C176F,TP53:NM_001126112:exon5:c.527G>T:p.C176F,TP53:NM_001126113:exon5:c.527G>T:p.C176F,T…	3.98e-06	8.803e-06	7.362e-06	0	3.976e-06	0	0	0	0	8.803e-06	0	0	0	8.967e-06	1.118e-05	9.747e-06	.	-	-	-	-	-	-	-	-	-	-	-	-	-	-	-	-	-	stomach	4
17	7578403	7578403	C	T	exonic	TP53	-	nonsynonymous SNV	TP53:NM_001126115:exon1:c.131G>A:p.C44Y,TP53:NM_001126116:exon1:c.131G>A:p.C44Y,TP53:NM_001126117:exon1:c.131G>A:p.C44Y,TP53:NM_001276697:exon1:c.50G>A:p.C17Y,TP53:NM_001276698:exon1:c.50G>A:p.C17Y,TP53:NM_001276699:exon1:c.50G>A:p.C17Y,TP53:NM_001126118:exon4:c.410G>A:p.C137Y,TP53:NM_000546:exon5:c.527G>A:p.C176Y,TP53:NM_001126112:exon5:c.527G>A:p.C176Y,TP53:NM_001126113:exon5:c.527G>A:p.C176Y,T…	-	-	-	-	-	-	-	-	-	-	-	-	-	-	-	-	-	-	-	-	-	-	-	-	-	-	-	-	-	-	-	-	-	-	stomach	1
3	178916876	178916876	G	A	exonic	PIK3CA	-	nonsynonymous SNV	PIK3CA:NM_006218:exon2:c.263G>A:p.R88Q	-	-	-	-	-	-	-	-	-	-	-	-	-	-	-	-	-	-	-	-	-	-	-	-	-	-	-	-	-	-	-	-	-	-	stomach	5
8	104898169	104898169	T	G	exonic	RIMS2	-	nonsynonymous SNV	RIMS2:NM_001282881:exon2:c.766T>G:p.L256V,RIMS2:NM_001348498:exon2:c.766T>G:p.L256V,RIMS2:NM_001348499:exon2:c.766T>G:p.L256V,RIMS2:NM_001348500:exon2:c.766T>G:p.L256V,RIMS2:NM_001348501:exon2:c.766T>G:p.L256V,RIMS2:NM_001348502:exon2:c.766T>G:p.L256V,RIMS2:NM_001348503:exon2:c.766T>G:p.L256V,RIMS2:NM_001348504:exon2:c.766T>G:p.L256V,RIMS2:NM_001348505:exon2:c.766T>G:p.L256V,RIMS2:NM_001348506:ex…	-	-	-	-	-	-	-	-	-	-	-	-	-	-	-	-	-	-	-	-	-	-	-	-	-	-	-	-	-	-	-	-	-	-	stomach	5
11	55340006	55340006	A	C	exonic	OR4C16	-	nonsynonymous SNV	OR4C16:NM_001004701:exon1:c.403A>C:p.S135R	0	.	0	0	3.976e-06	0	0	0	0	0	0	0	0	.	.	.	.	-	-	-	-	-	-	-	-	-	-	-	-	-	-	-	-	-	stomach	4
11	55340006	55340006	A	T	exonic	OR4C16	-	nonsynonymous SNV	OR4C16:NM_001004701:exon1:c.403A>T:p.S135C	-	-	-	-	-	-	-	-	-	-	-	-	-	-	-	-	-	-	-	-	-	-	-	-	-	-	-	-	-	-	-	-	-	-	stomach	1
5	41149516	41149516	T	G	exonic	C6	-	nonsynonymous SNV	C6:NM_000065:exon17:c.2450A>C:p.K817T,C6:NM_001115131:exon17:c.2450A>C:p.K817T	-	-	-	-	-	-	-	-	-	-	-	-	-	-	-	-	-	-	-	-	-	-	-	-	-	-	-	-	-	-	-	-	-	-	stomach	4
12	25398285	25398285	C	T	exonic	KRAS	-	nonsynonymous SNV	KRAS:NM_001369786:exon2:c.34G>A:p.G12S,KRAS:NM_001369787:exon2:c.34G>A:p.G12S,KRAS:NM_004985:exon2:c.34G>A:p.G12S,KRAS:NM_033360:exon2:c.34G>A:p.G12S	0	.	0	0	7.953e-06	0	0	0	0	0	0	0	0	.	.	.	.	-	-	-	-	-	-	-	-	-	-	-	-	-	-	-	-	-	stomach	3
12	25398285	25398285	C	A	exonic	KRAS	-	nonsynonymous SNV	KRAS:NM_001369786:exon2:c.34G>T:p.G12C,KRAS:NM_001369787:exon2:c.34G>T:p.G12C,KRAS:NM_004985:exon2:c.34G>T:p.G12C,KRAS:NM_033360:exon2:c.34G>T:p.G12C	0	.	0	0	1.988e-05	0	0	0	0	0	0	0	0	.	.	.	.	-	-	-	-	-	-	-	-	-	-	-	-	-	-	-	-	-	stomach	1
3	178921553	178921553	T	A	exonic	PIK3CA	-	nonsynonymous SNV	PIK3CA:NM_006218:exon5:c.1035T>A:p.N345K	-	-	-	-	-	-	-	-	-	-	-	-	-	-	-	-	-	-	-	-	-	-	-	-	-	-	-	-	-	-	-	-	-	-	stomach	4
18	48591918	48591918	C	T	exonic	SMAD4	-	nonsynonymous SNV	SMAD4:NM_005359:exon9:c.1081C>T:p.R361C	0	.	0	0	3.976e-06	0	0	0	0	0	0	0	0	.	.	.	.	-	-	-	-	-	-	-	-	-	-	-	-	-	-	-	-	-	stomach	4
13	100909900	100909900	G	A	exonic	PCCA	-	nonsynonymous SNV	PCCA:NM_001127692:exon8:c.611G>A:p.R204H,PCCA:NM_001352607:exon8:c.611G>A:p.R204H,PCCA:NM_001352608:exon8:c.611G>A:p.R204H,PCCA:NM_000282:exon9:c.689G>A:p.R230H,PCCA:NM_001178004:exon9:c.689G>A:p.R230H,PCCA:NM_001352605:exon9:c.689G>A:p.R230H,PCCA:NM_001352606:exon9:c.689G>A:p.R230H,PCCA:NM_001352609:exon9:c.689G>A:p.R230H	1.593e-05	5.439e-05	7.368e-06	2.599e-05	1.591e-05	0	0	2.895e-05	5.439e-05	1.761e-05	0	0	0	5.44e-05	7.458e-05	2.923e-05	.	3.185e-05	0.0001	5.723e-05	0	3.183e-05	0.0001	.	0	0	0	0	0	0	0.0001	0.0003	.	.	stomach	4
20	39832810	39832810	G	T	exonic	ZHX3	-	nonsynonymous SNV	ZHX3:NM_015035:exon3:c.747C>A:p.N249K	6.497e-05	0.0002	8.274e-05	4.412e-05	6.362e-05	0	0.0002	2.932e-05	0.0002	5.382e-05	0	0	0	0.0002	0.0002	0.0002	0.0002	3.186e-05	.	0	7.184e-05	3.183e-05	0	.	0	0	0	0	0	0.0009	.	.	.	.	stomach	4
3	178560470	178560470	T	G	exonic	KCNMB2	-	nonsynonymous SNV	KCNMB2:NM_001278911:exon5:c.453T>G:p.N151K,KCNMB2:NM_181361:exon5:c.453T>G:p.N151K,KCNMB2:NM_005832:exon6:c.453T>G:p.N151K	-	-	-	-	-	-	-	-	-	-	-	-	-	-	-	-	-	-	-	-	-	-	-	-	-	-	-	-	-	-	-	-	-	-	stomach	4
17	37868208	37868208	C	T	exonic	ERBB2	-	nonsynonymous SNV	ERBB2:NM_001289937:exon8:c.929C>T:p.S310F,ERBB2:NM_004448:exon8:c.929C>T:p.S310F,ERBB2:NM_001005862:exon11:c.839C>T:p.S280F,ERBB2:NM_001289938:exon11:c.839C>T:p.S280F,ERBB2:NM_001289936:exon12:c.884C>T:p.S295F	-	-	-	-	-	-	-	-	-	-	-	-	-	-	-	-	-	-	-	-	-	-	-	-	-	-	-	-	-	-	-	-	-	-	stomach	3
17	37868208	37868208	C	A	exonic	ERBB2	-	nonsynonymous SNV	ERBB2:NM_001289937:exon8:c.929C>A:p.S310Y,ERBB2:NM_004448:exon8:c.929C>A:p.S310Y,ERBB2:NM_001005862:exon11:c.839C>A:p.S280Y,ERBB2:NM_001289938:exon11:c.839C>A:p.S280Y,ERBB2:NM_001289936:exon12:c.884C>A:p.S295Y	-	-	-	-	-	-	-	-	-	-	-	-	-	-	-	-	-	-	-	-	-	-	-	-	-	-	-	-	-	-	-	-	-	-	stomach	1
8	15480646	15480646	T	G	exonic	TUSC3	-	nonsynonymous SNV	TUSC3:NM_001356429:exon2:c.196T>G:p.F66V,TUSC3:NM_006765:exon2:c.196T>G:p.F66V,TUSC3:NM_178234:exon2:c.196T>G:p.F66V	-	-	-	-	-	-	-	-	-	-	-	-	-	-	-	-	-	-	-	-	-	-	-	-	-	-	-	-	-	-	-	-	-	-	stomach	3
8	15480646	15480646	T	A	exonic	TUSC3	-	nonsynonymous SNV	TUSC3:NM_001356429:exon2:c.196T>A:p.F66I,TUSC3:NM_006765:exon2:c.196T>A:p.F66I,TUSC3:NM_178234:exon2:c.196T>A:p.F66I	-	-	-	-	-	-	-	-	-	-	-	-	-	-	-	-	-	-	-	-	-	-	-	-	-	-	-	-	-	-	-	-	-	-	stomach	1
15	24922914	24922914	A	G	exonic	NPAP1	-	nonsynonymous SNV	NPAP1:NM_018958:exon1:c.1900A>G:p.S634G	-	-	-	-	-	-	-	-	-	-	-	-	-	-	-	-	-	-	-	-	-	-	-	-	-	-	-	-	-	-	-	-	-	-	stomach	2
15	24922914	24922914	A	T	exonic	NPAP1	-	nonsynonymous SNV	NPAP1:NM_018958:exon1:c.1900A>T:p.S634C	-	-	-	-	-	-	-	-	-	-	-	-	-	-	-	-	-	-	-	-	-	-	-	-	-	-	-	-	-	-	-	-	-	-	stomach	1
15	24922914	24922914	A	C	exonic	NPAP1	-	nonsynonymous SNV	NPAP1:NM_018958:exon1:c.1900A>C:p.S634R	-	-	-	-	-	-	-	-	-	-	-	-	-	-	-	-	-	-	-	-	-	-	-	-	-	-	-	-	-	-	-	-	-	-	stomach	1
17	37879658	37879658	G	A	exonic	ERBB2	-	nonsynonymous SNV	ERBB2:NM_001289937:exon17:c.2033G>A:p.R678Q,ERBB2:NM_004448:exon17:c.2033G>A:p.R678Q,ERBB2:NM_001005862:exon20:c.1943G>A:p.R648Q,ERBB2:NM_001289936:exon21:c.1988G>A:p.R663Q	-	-	-	-	-	-	-	-	-	-	-	-	-	-	-	-	-	-	-	-	-	-	-	-	-	-	-	-	-	-	-	-	-	-	stomach	4
11	6265440	6265440	A	C	exonic	CNGA4	-	nonsynonymous SNV	CNGA4:NM_001037329:exon6:c.1529A>C:p.K510T	-	-	-	-	-	-	-	-	-	-	-	-	-	-	-	-	-	-	-	-	-	-	-	-	-	-	-	-	-	-	-	-	-	-	stomach	4
18	5394733	5394733	T	G	exonic	EPB41L3	-	nonsynonymous SNV	EPB41L3:NM_001281534:exon19:c.2547A>C:p.K849N,EPB41L3:NM_001281535:exon21:c.2220A>C:p.K740N,EPB41L3:NM_001330557:exon21:c.2706A>C:p.K902N,EPB41L3:NM_012307:exon22:c.3213A>C:p.K1071N	-	-	-	-	-	-	-	-	-	-	-	-	-	-	-	-	-	-	-	-	-	-	-	-	-	-	-	-	-	-	-	-	-	-	stomach	3
18	5394733	5394733	T	A	exonic	EPB41L3	-	nonsynonymous SNV	EPB41L3:NM_001281534:exon19:c.2547A>T:p.K849N,EPB41L3:NM_001281535:exon21:c.2220A>T:p.K740N,EPB41L3:NM_001330557:exon21:c.2706A>T:p.K902N,EPB41L3:NM_012307:exon22:c.3213A>T:p.K1071N	-	-	-	-	-	-	-	-	-	-	-	-	-	-	-	-	-	-	-	-	-	-	-	-	-	-	-	-	-	-	-	-	-	-	stomach	1
13	36776025	36776025	T	C	exonic	CCDC169-SOHLH2;SOHLH2	-	nonsynonymous SNV	SOHLH2:NM_001282147:exon2:c.254A>G:p.K85R,SOHLH2:NM_017826:exon2:c.254A>G:p.K85R,CCDC169-SOHLH2:NM_001198910:exon7:c.485A>G:p.K162R	-	-	-	-	-	-	-	-	-	-	-	-	-	-	-	-	-	3.183e-05	6.478e-05	5.72e-05	0	3.183e-05	0	.	0	0	6.478e-05	0	0	0	9.014e-05	.	.	.	stomach	3
13	36776025	36776025	T	G	exonic	CCDC169-SOHLH2;SOHLH2	-	nonsynonymous SNV	SOHLH2:NM_001282147:exon2:c.254A>C:p.K85T,SOHLH2:NM_017826:exon2:c.254A>C:p.K85T,CCDC169-SOHLH2:NM_001198910:exon7:c.485A>C:p.K162T	-	-	-	-	-	-	-	-	-	-	-	-	-	-	-	-	-	-	-	-	-	-	-	-	-	-	-	-	-	-	-	-	-	-	stomach	1
13	36776025	36776025	T	C	exonic	CCDC169-SOHLH2;SOHLH2	-	nonsynonymous SNV	SOHLH2:NM_001282147:exon2:c.254A>G:p.K85R,SOHLH2:NM_017826:exon2:c.254A>G:p.K85R,CCDC169-SOHLH2:NM_001198910:exon7:c.485A>G:p.K162R	-	-	-	-	-	-	-	-	-	-	-	-	-	-	-	-	-	3.183e-05	6.478e-05	5.72e-05	0	3.183e-05	0	.	0	0	6.478e-05	0	0	0	9.014e-05	.	.	.	stomach	3
13	36776025	36776025	T	G	exonic	CCDC169-SOHLH2;SOHLH2	-	nonsynonymous SNV	SOHLH2:NM_001282147:exon2:c.254A>C:p.K85T,SOHLH2:NM_017826:exon2:c.254A>C:p.K85T,CCDC169-SOHLH2:NM_001198910:exon7:c.485A>C:p.K162T	-	-	-	-	-	-	-	-	-	-	-	-	-	-	-	-	-	-	-	-	-	-	-	-	-	-	-	-	-	-	-	-	-	-	stomach	1
6	153019200	153019200	A	C	exonic	MYCT1	-	nonsynonymous SNV	MYCT1:NM_001371624:exon1:c.19A>C:p.S7R,MYCT1:NM_001371625:exon1:c.19A>C:p.S7R,MYCT1:NM_001371626:exon1:c.19A>C:p.S7R,MYCT1:NM_025107:exon1:c.163A>C:p.S55R	-	-	-	-	-	-	-	-	-	-	-	-	-	-	-	-	-	-	-	-	-	-	-	-	-	-	-	-	-	-	-	-	-	-	stomach	3
6	153019200	153019200	A	G	exonic	MYCT1	-	nonsynonymous SNV	MYCT1:NM_001371624:exon1:c.19A>G:p.S7G,MYCT1:NM_001371625:exon1:c.19A>G:p.S7G,MYCT1:NM_001371626:exon1:c.19A>G:p.S7G,MYCT1:NM_025107:exon1:c.163A>G:p.S55G	-	-	-	-	-	-	-	-	-	-	-	-	-	-	-	-	-	-	-	-	-	-	-	-	-	-	-	-	-	-	-	-	-	-	stomach	1
17	7577539	7577539	G	A	exonic	TP53	-	nonsynonymous SNV	TP53:NM_001126115:exon3:c.346C>T:p.R116W,TP53:NM_001126116:exon3:c.346C>T:p.R116W,TP53:NM_001126117:exon3:c.346C>T:p.R116W,TP53:NM_001276697:exon3:c.265C>T:p.R89W,TP53:NM_001276698:exon3:c.265C>T:p.R89W,TP53:NM_001276699:exon3:c.265C>T:p.R89W,TP53:NM_001126118:exon6:c.625C>T:p.R209W,TP53:NM_000546:exon7:c.742C>T:p.R248W,TP53:NM_001126112:exon7:c.742C>T:p.R248W,TP53:NM_001126113:exon7:c.742C>T:p.R…	3.977e-06	8.791e-06	7.358e-06	0	1.193e-05	0	0	0	0	8.791e-06	0	0	0	8.955e-06	1.117e-05	9.733e-06	2.338e-05	-	-	-	-	-	-	-	-	-	-	-	-	-	-	-	-	-	stomach	4
17	7578190	7578190	T	C	exonic	TP53	-	nonsynonymous SNV	TP53:NM_001126115:exon2:c.263A>G:p.Y88C,TP53:NM_001126116:exon2:c.263A>G:p.Y88C,TP53:NM_001126117:exon2:c.263A>G:p.Y88C,TP53:NM_001276697:exon2:c.182A>G:p.Y61C,TP53:NM_001276698:exon2:c.182A>G:p.Y61C,TP53:NM_001276699:exon2:c.182A>G:p.Y61C,TP53:NM_001126118:exon5:c.542A>G:p.Y181C,TP53:NM_000546:exon6:c.659A>G:p.Y220C,TP53:NM_001126112:exon6:c.659A>G:p.Y220C,TP53:NM_001126113:exon6:c.659A>G:p.Y220…	7.955e-06	1.759e-05	7.359e-06	8.656e-06	1.988e-05	0	0	0	0	1.759e-05	0	0	0	1.792e-05	1.117e-05	1.947e-05	2.339e-05	-	-	-	-	-	-	-	-	-	-	-	-	-	-	-	-	-	stomach	4
16	65005898	65005898	T	G	exonic	CDH11	-	nonsynonymous SNV	CDH11:NM_001330576:exon9:c.1082A>C:p.K361T,CDH11:NM_001308392:exon10:c.1460A>C:p.K487T,CDH11:NM_001797:exon10:c.1460A>C:p.K487T	-	-	-	-	-	-	-	-	-	-	-	-	-	-	-	-	-	-	-	-	-	-	-	-	-	-	-	-	-	-	-	-	-	-	stomach	2
16	65005898	65005898	T	A	exonic	CDH11	-	nonsynonymous SNV	CDH11:NM_001330576:exon9:c.1082A>T:p.K361M,CDH11:NM_001308392:exon10:c.1460A>T:p.K487M,CDH11:NM_001797:exon10:c.1460A>T:p.K487M	-	-	-	-	-	-	-	-	-	-	-	-	-	-	-	-	-	-	-	-	-	-	-	-	-	-	-	-	-	-	-	-	-	-	stomach	1
16	65005898	65005898	T	C	exonic	CDH11	-	nonsynonymous SNV	CDH11:NM_001330576:exon9:c.1082A>G:p.K361R,CDH11:NM_001308392:exon10:c.1460A>G:p.K487R,CDH11:NM_001797:exon10:c.1460A>G:p.K487R	-	-	-	-	-	-	-	-	-	-	-	-	-	-	-	-	-	-	-	-	-	-	-	-	-	-	-	-	-	-	-	-	-	-	stomach	1
17	38560458	38560458	C	A	exonic	TOP2A	-	nonsynonymous SNV	TOP2A:NM_001067:exon19:c.2229G>T:p.K743N	-	-	-	-	-	-	-	-	-	-	-	-	-	-	-	-	-	-	-	-	-	-	-	-	-	-	-	-	-	-	-	-	-	-	stomach	4
3	41266113	41266113	C	G	exonic	CTNNB1	-	nonsynonymous SNV	CTNNB1:NM_001098209:exon3:c.110C>G:p.S37C,CTNNB1:NM_001098210:exon3:c.110C>G:p.S37C,CTNNB1:NM_001904:exon3:c.110C>G:p.S37C,CTNNB1:NM_001330729:exon4:c.89C>G:p.S30C	-	-	-	-	-	-	-	-	-	-	-	-	-	-	-	-	-	-	-	-	-	-	-	-	-	-	-	-	-	-	-	-	-	-	stomach	2
3	41266113	41266113	C	T	exonic	CTNNB1	-	nonsynonymous SNV	CTNNB1:NM_001098209:exon3:c.110C>T:p.S37F,CTNNB1:NM_001098210:exon3:c.110C>T:p.S37F,CTNNB1:NM_001904:exon3:c.110C>T:p.S37F,CTNNB1:NM_001330729:exon4:c.89C>T:p.S30F	-	-	-	-	-	-	-	-	-	-	-	-	-	-	-	-	-	-	-	-	-	-	-	-	-	-	-	-	-	-	-	-	-	-	stomach	2
19	22585671	22585671	T	G	exonic	ZNF98	-	nonsynonymous SNV	ZNF98:NM_001098626:exon3:c.173A>C:p.K58T	-	-	-	-	-	-	-	-	-	-	-	-	-	-	-	-	-	-	-	-	-	-	-	-	-	-	-	-	-	-	-	-	-	-	stomach	3
19	22585671	22585671	T	C	exonic	ZNF98	-	nonsynonymous SNV	ZNF98:NM_001098626:exon3:c.173A>G:p.K58R	-	-	-	-	-	-	-	-	-	-	-	-	-	-	-	-	-	-	-	-	-	-	-	-	-	-	-	-	-	-	-	-	-	-	stomach	1
11	89531678	89531678	T	G	exonic	TRIM49	-	nonsynonymous SNV	TRIM49:NM_020358:exon8:c.979A>C:p.S327R	-	-	-	-	-	-	-	-	-	-	-	-	-	-	-	-	-	-	-	-	-	-	-	-	-	-	-	-	-	-	-	-	-	-	stomach	4
1	211192300	211192300	A	C	exonic	KCNH1	-	nonsynonymous SNV	KCNH1:NM_002238:exon6:c.857T>G:p.L286R,KCNH1:NM_172362:exon6:c.857T>G:p.L286R	-	-	-	-	-	-	-	-	-	-	-	-	-	-	-	-	-	-	-	-	-	-	-	-	-	-	-	-	-	-	-	-	-	-	stomach	1
1	211192300	211192300	A	T	exonic	KCNH1	-	nonsynonymous SNV	KCNH1:NM_002238:exon6:c.857T>A:p.L286H,KCNH1:NM_172362:exon6:c.857T>A:p.L286H	-	-	-	-	-	-	-	-	-	-	-	-	-	-	-	-	-	-	-	-	-	-	-	-	-	-	-	-	-	-	-	-	-	-	stomach	1
1	211192300	211192300	A	G	exonic	KCNH1	-	nonsynonymous SNV	KCNH1:NM_002238:exon6:c.857T>C:p.L286P,KCNH1:NM_172362:exon6:c.857T>C:p.L286P	-	-	-	-	-	-	-	-	-	-	-	-	-	-	-	-	-	-	-	-	-	-	-	-	-	-	-	-	-	-	-	-	-	-	stomach	1
12	108004005	108004005	C	T	exonic	BTBD11	-	nonsynonymous SNV	BTBD11:NM_001017523:exon3:c.293C>T:p.A98V,BTBD11:NM_001018072:exon5:c.1682C>T:p.A561V,BTBD11:NM_001347943:exon5:c.1682C>T:p.A561V,BTBD11:NM_001347944:exon5:c.584C>T:p.A195V	-	-	-	-	-	-	-	-	-	-	-	-	-	-	-	-	-	-	-	-	-	-	-	-	-	-	-	-	-	-	-	-	-	-	stomach	3
3	52442054	52442054	C	T	exonic	BAP1	-	nonsynonymous SNV	BAP1:NM_004656:exon5:c.295G>A:p.V99M	-	-	-	-	-	-	-	-	-	-	-	-	-	-	-	-	-	-	-	-	-	-	-	-	-	-	-	-	-	-	-	-	-	-	stomach	3
5	33937024	33937024	C	T	exonic	RXFP3	-	nonsynonymous SNV	RXFP3:NM_016568:exon1:c.179C>T:p.A60V	-	-	-	-	-	-	-	-	-	-	-	-	-	-	-	-	-	-	-	-	-	-	-	-	-	-	-	-	-	-	-	-	-	-	stomach	3
1	248308867	248308867	A	C	exonic	OR2M5	-	nonsynonymous SNV	OR2M5:NM_001004690:exon1:c.418A>C:p.I140L	-	-	-	-	-	-	-	-	-	-	-	-	-	-	-	-	-	-	-	-	-	-	-	-	-	-	-	-	-	-	-	-	-	-	stomach	2
1	248308867	248308867	A	G	exonic	OR2M5	-	nonsynonymous SNV	OR2M5:NM_001004690:exon1:c.418A>G:p.I140V	-	-	-	-	-	-	-	-	-	-	-	-	-	-	-	-	-	-	-	-	-	-	-	-	-	-	-	-	-	-	-	-	-	-	stomach	1
13	78492668	78492668	G	A	exonic	EDNRB	-	nonsynonymous SNV	EDNRB:NM_001122659:exon1:c.41C>T:p.A14V,EDNRB:NM_003991:exon1:c.41C>T:p.A14V,EDNRB:NM_000115:exon2:c.41C>T:p.A14V,EDNRB:NM_001201397:exon2:c.311C>T:p.A104V	-	-	-	-	-	-	-	-	-	-	-	-	-	-	-	-	-	-	-	-	-	-	-	-	-	-	-	-	-	-	-	-	-	-	stomach	3
20	21687619	21687619	C	T	exonic	PAX1	-	nonsynonymous SNV	PAX1:NM_001257096:exon2:c.830C>T:p.A277V,PAX1:NM_006192:exon2:c.830C>T:p.A277V	-	-	-	-	-	-	-	-	-	-	-	-	-	-	-	-	-	-	-	-	-	-	-	-	-	-	-	-	-	-	-	-	-	-	stomach	3
20	36640099	36640099	C	T	exonic	TTI1	-	nonsynonymous SNV	TTI1:NM_001303457:exon2:c.2120G>A:p.R707H,TTI1:NM_014657:exon3:c.2120G>A:p.R707H	5.968e-05	0.0001	8.098e-05	3.463e-05	5.964e-05	0.0001	0	2.891e-05	0	7.92e-05	4.62e-05	0	0.0003	0.0002	0.0001	0.0001	0.0001	6.369e-05	0.0001	0	0.0001	6.366e-05	0.0001	.	0	0	6.479e-05	0	0	0	0.0001	7.34e-05	.	0.0002	stomach	3
4	153247366	153247366	C	T	exonic	FBXW7	-	nonsynonymous SNV	FBXW7:NM_001013415:exon9:c.1082G>A:p.R361Q,FBXW7:NM_018315:exon9:c.1196G>A:p.R399Q,FBXW7:NM_033632:exon10:c.1436G>A:p.R479Q,FBXW7:NM_001349798:exon12:c.1436G>A:p.R479Q	-	-	-	-	-	-	-	-	-	-	-	-	-	-	-	-	-	-	-	-	-	-	-	-	-	-	-	-	-	-	-	-	-	-	stomach	3
14	86087980	86087980	G	A	exonic	FLRT2	-	nonsynonymous SNV	FLRT2:NM_001346143:exon2:c.122G>A:p.R41H,FLRT2:NM_001346144:exon2:c.122G>A:p.R41H,FLRT2:NM_001346145:exon2:c.122G>A:p.R41H,FLRT2:NM_001346146:exon2:c.122G>A:p.R41H,FLRT2:NM_013231:exon2:c.122G>A:p.R41H	3.977e-06	8.792e-06	0	8.654e-06	3.976e-06	0	0	0	0	8.792e-06	0	0	0	8.956e-06	.	9.734e-06	.	-	-	-	-	-	-	-	-	-	-	-	-	-	-	-	-	-	stomach	2
14	86087980	86087980	G	T	exonic	FLRT2	-	nonsynonymous SNV	FLRT2:NM_001346143:exon2:c.122G>T:p.R41L,FLRT2:NM_001346144:exon2:c.122G>T:p.R41L,FLRT2:NM_001346145:exon2:c.122G>T:p.R41L,FLRT2:NM_001346146:exon2:c.122G>T:p.R41L,FLRT2:NM_013231:exon2:c.122G>T:p.R41L	-	-	-	-	-	-	-	-	-	-	-	-	-	-	-	-	-	-	-	-	-	-	-	-	-	-	-	-	-	-	-	-	-	-	stomach	1
18	48591919	48591919	G	A	exonic	SMAD4	-	nonsynonymous SNV	SMAD4:NM_005359:exon9:c.1082G>A:p.R361H	-	-	-	-	-	-	-	-	-	-	-	-	-	-	-	-	-	-	-	-	-	-	-	-	-	-	-	-	-	-	-	-	-	-	stomach	2
18	48591919	48591919	G	C	exonic	SMAD4	-	nonsynonymous SNV	SMAD4:NM_005359:exon9:c.1082G>C:p.R361P	-	-	-	-	-	-	-	-	-	-	-	-	-	-	-	-	-	-	-	-	-	-	-	-	-	-	-	-	-	-	-	-	-	-	stomach	1
10	11990443	11990443	T	A	exonic	UPF2	-	nonsynonymous SNV	UPF2:NM_015542:exon16:c.3099A>T:p.E1033D,UPF2:NM_080599:exon16:c.3099A>T:p.E1033D	4.041e-06	2.9e-05	7.461e-06	0	8.026e-06	0	0	2.9e-05	0	0	0	0	0	2.912e-05	3.288e-05	2.928e-05	5.857e-05	-	-	-	-	-	-	-	-	-	-	-	-	-	-	-	-	-	stomach	3
17	80049217	80049217	G	A	exonic	FASN	-	nonsynonymous SNV	FASN:NM_004104:exon9:c.1373C>T:p.A458V	1.686e-05	9.934e-05	7.695e-06	2.797e-05	2.394e-05	6.793e-05	9.934e-05	0	0	0	0	0	0	9.934e-05	9.936e-05	9.96e-05	0.0002	-	-	-	-	-	-	-	-	-	-	-	-	-	-	-	-	-	stomach	3
19	54401306	54401306	C	T	exonic	PRKCG	-	nonsynonymous SNV	PRKCG:NM_001316329:exon10:c.1033C>T:p.R345C,PRKCG:NM_002739:exon10:c.1033C>T:p.R345C	-	-	-	-	-	-	-	-	-	-	-	-	-	-	-	-	-	-	-	-	-	-	-	-	-	-	-	-	-	-	-	-	-	-	stomach	3
11	33050184	33050184	C	T	exonic	DEPDC7	-	nonsynonymous SNV	DEPDC7:NM_001077242:exon4:c.628C>T:p.R210C,DEPDC7:NM_139160:exon4:c.601C>T:p.R201C	2.546e-05	6.551e-05	3.908e-05	9.284e-06	2.801e-05	6.551e-05	3.653e-05	3.329e-05	0	2.739e-05	0	0	0	8.98e-05	6.566e-05	7.187e-05	0.0001	3.186e-05	6.483e-05	5.726e-05	0	6.366e-05	0	.	0	0	6.483e-05	0	0	0	.	7.344e-05	.	.	stomach	3
18	65180462	65180462	T	G	exonic	DSEL	-	nonsynonymous SNV	DSEL:NM_032160:exon2:c.1384A>C:p.S462R	-	-	-	-	-	-	-	-	-	-	-	-	-	-	-	-	-	-	-	-	-	-	-	-	-	-	-	-	-	-	-	-	-	-	stomach	3
2	168100923	168100923	A	C	exonic	XIRP2	-	nonsynonymous SNV	XIRP2:NM_001199144:exon7:c.2355A>C:p.E785D,XIRP2:NM_152381:exon9:c.3021A>C:p.E1007D	-	-	-	-	-	-	-	-	-	-	-	-	-	-	-	-	-	-	-	-	-	-	-	-	-	-	-	-	-	-	-	-	-	-	stomach	3
8	51449331	51449331	C	T	exonic	SNTG1	-	nonsynonymous SNV	SNTG1:NM_001287814:exon10:c.643C>T:p.R215C,SNTG1:NM_001321773:exon10:c.643C>T:p.R215C,SNTG1:NM_001321777:exon10:c.643C>T:p.R215C,SNTG1:NM_001321776:exon11:c.643C>T:p.R215C,SNTG1:NM_001321778:exon11:c.643C>T:p.R215C,SNTG1:NM_018967:exon11:c.643C>T:p.R215C,SNTG1:NM_001287813:exon12:c.643C>T:p.R215C,SNTG1:NM_001321775:exon12:c.643C>T:p.R215C	3.986e-06	8.833e-06	7.377e-06	0	3.976e-06	0	0	0	0	8.833e-06	0	0	0	8.999e-06	1.117e-05	9.785e-06	2.338e-05	-	-	-	-	-	-	-	-	-	-	-	-	-	-	-	-	-	stomach	3
1	9795564	9795564	G	A	exonic	CLSTN1	-	nonsynonymous SNV	CLSTN1:NM_001302883:exon12:c.1787C>T:p.T596M,CLSTN1:NM_014944:exon12:c.1814C>T:p.T605M,CLSTN1:NM_001009566:exon13:c.1844C>T:p.T615M	1.193e-05	0.0001	7.357e-06	1.731e-05	1.193e-05	0.0001	0	0	0	8.79e-06	0	0	0	0.0002	0.0001	0.0001	0.0003	6.369e-05	0.0002	0.0001	0	6.366e-05	0.0002	.	0	0	0	0	0	0	0.0002	0.0006	.	0.0008	stomach	3
8	55534032	55534032	C	T	exonic	RP1	-	nonsynonymous SNV	RP1:NM_006269:exon2:c.506C>T:p.A169V	4.017e-06	8.987e-06	7.418e-06	0	4e-06	0	0	0	0	8.987e-06	0	0	0	9.158e-06	1.145e-05	9.967e-06	2.338e-05	-	-	-	-	-	-	-	-	-	-	-	-	-	-	-	-	-	stomach	3
13	23905608	23905608	A	C	exonic	SACS	-	nonsynonymous SNV	SACS:NM_001278055:exon8:c.11966T>G:p.L3989R,SACS:NM_014363:exon10:c.12407T>G:p.L4136R	-	-	-	-	-	-	-	-	-	-	-	-	-	-	-	-	-	-	-	-	-	-	-	-	-	-	-	-	-	-	-	-	-	-	stomach	3
9	120475898	120475898	T	G	exonic	TLR4	-	nonsynonymous SNV	TLR4:NM_138557:exon2:c.892T>G:p.L298V,TLR4:NM_138554:exon3:c.1492T>G:p.L498V,TLR4:NM_003266:exon4:c.1372T>G:p.L458V	-	-	-	-	-	-	-	-	-	-	-	-	-	-	-	-	-	-	-	-	-	-	-	-	-	-	-	-	-	-	-	-	-	-	stomach	3
13	19997247	19997247	A	C	exonic	TPTE2	-	nonsynonymous SNV	TPTE2:NM_001271850:exon7:c.537T>G:p.I179M,TPTE2:NM_130785:exon18:c.1293T>G:p.I431M,TPTE2:NM_001141968:exon19:c.1191T>G:p.I397M,TPTE2:NM_199254:exon21:c.1524T>G:p.I508M	4.03e-06	8.893e-06	7.434e-06	0	3.978e-06	0	0	0	0	8.893e-06	0	0	0	9.057e-06	1.127e-05	9.857e-06	.	-	-	-	-	-	-	-	-	-	-	-	-	-	-	-	-	-	stomach	3
1	198711490	198711490	A	C	exonic	PTPRC	-	nonsynonymous SNV	PTPRC:NM_080921:exon22:c.2208A>C:p.Q736H,PTPRC:NM_002838:exon25:c.2691A>C:p.Q897H	-	-	-	-	-	-	-	-	-	-	-	-	-	-	-	-	-	-	-	-	-	-	-	-	-	-	-	-	-	-	-	-	-	-	stomach	2
1	198711490	198711490	A	T	exonic	PTPRC	-	nonsynonymous SNV	PTPRC:NM_080921:exon22:c.2208A>T:p.Q736H,PTPRC:NM_002838:exon25:c.2691A>T:p.Q897H	-	-	-	-	-	-	-	-	-	-	-	-	-	-	-	-	-	-	-	-	-	-	-	-	-	-	-	-	-	-	-	-	-	-	stomach	1
11	4928970	4928970	T	G	exonic	OR51A7	-	nonsynonymous SNV	OR51A7:NM_001004749:exon1:c.371T>G:p.L124R	-	-	-	-	-	-	-	-	-	-	-	-	-	-	-	-	-	-	-	-	-	-	-	-	-	-	-	-	-	-	-	-	-	-	stomach	3
2	179472135	179472135	T	G	exonic	TTN	-	nonsynonymous SNV	TTN:NM_003319:exon105:c.26085A>C:p.E8695D,TTN:NM_133432:exon106:c.26460A>C:p.E8820D,TTN:NM_133437:exon106:c.26661A>C:p.E8887D,TTN:NM_133378:exon226:c.45576A>C:p.E15192D,TTN:NM_001256850:exon227:c.48357A>C:p.E16119D,TTN:NM_001267550:exon277:c.53280A>C:p.E17760D	-	-	-	-	-	-	-	-	-	-	-	-	-	-	-	-	-	-	-	-	-	-	-	-	-	-	-	-	-	-	-	-	-	-	stomach	3
8	104898091	104898091	A	C	exonic	RIMS2	-	nonsynonymous SNV	RIMS2:NM_001282881:exon2:c.688A>C:p.S230R,RIMS2:NM_001348498:exon2:c.688A>C:p.S230R,RIMS2:NM_001348499:exon2:c.688A>C:p.S230R,RIMS2:NM_001348500:exon2:c.688A>C:p.S230R,RIMS2:NM_001348501:exon2:c.688A>C:p.S230R,RIMS2:NM_001348502:exon2:c.688A>C:p.S230R,RIMS2:NM_001348503:exon2:c.688A>C:p.S230R,RIMS2:NM_001348504:exon2:c.688A>C:p.S230R,RIMS2:NM_001348505:exon2:c.688A>C:p.S230R,RIMS2:NM_001348506:ex…	-	-	-	-	-	-	-	-	-	-	-	-	-	-	-	-	-	-	-	-	-	-	-	-	-	-	-	-	-	-	-	-	-	-	stomach	2
8	104898091	104898091	A	G	exonic	RIMS2	-	nonsynonymous SNV	RIMS2:NM_001282881:exon2:c.688A>G:p.S230G,RIMS2:NM_001348498:exon2:c.688A>G:p.S230G,RIMS2:NM_001348499:exon2:c.688A>G:p.S230G,RIMS2:NM_001348500:exon2:c.688A>G:p.S230G,RIMS2:NM_001348501:exon2:c.688A>G:p.S230G,RIMS2:NM_001348502:exon2:c.688A>G:p.S230G,RIMS2:NM_001348503:exon2:c.688A>G:p.S230G,RIMS2:NM_001348504:exon2:c.688A>G:p.S230G,RIMS2:NM_001348505:exon2:c.688A>G:p.S230G,RIMS2:NM_001348506:ex…	-	-	-	-	-	-	-	-	-	-	-	-	-	-	-	-	-	-	-	-	-	-	-	-	-	-	-	-	-	-	-	-	-	-	stomach	1
7	77885499	77885499	A	C	exonic	MAGI2	-	nonsynonymous SNV	MAGI2:NM_001301128:exon10:c.1808T>G:p.L603R,MAGI2:NM_012301:exon10:c.1808T>G:p.L603R	-	-	-	-	-	-	-	-	-	-	-	-	-	-	-	-	-	-	-	-	-	-	-	-	-	-	-	-	-	-	-	-	-	-	stomach	2
7	77885499	77885499	A	G	exonic	MAGI2	-	nonsynonymous SNV	MAGI2:NM_001301128:exon10:c.1808T>C:p.L603P,MAGI2:NM_012301:exon10:c.1808T>C:p.L603P	-	-	-	-	-	-	-	-	-	-	-	-	-	-	-	-	-	-	-	-	-	-	-	-	-	-	-	-	-	-	-	-	-	-	stomach	1
3	178927980	178927980	T	C	exonic	PIK3CA	-	nonsynonymous SNV	PIK3CA:NM_006218:exon8:c.1258T>C:p.C420R	-	-	-	-	-	-	-	-	-	-	-	-	-	-	-	-	-	-	-	-	-	-	-	-	-	-	-	-	-	-	-	-	-	-	stomach	3
6	55406891	55406891	T	G	exonic	HMGCLL1	-	nonsynonymous SNV	HMGCLL1:NM_001042406:exon2:c.156A>C:p.E52D,HMGCLL1:NM_001287741:exon2:c.156A>C:p.E52D,HMGCLL1:NM_001287753:exon2:c.156A>C:p.E52D,HMGCLL1:NM_019036:exon3:c.246A>C:p.E82D	-	-	-	-	-	-	-	-	-	-	-	-	-	-	-	-	-	-	-	-	-	-	-	-	-	-	-	-	-	-	-	-	-	-	stomach	2
6	55406891	55406891	T	A	exonic	HMGCLL1	-	nonsynonymous SNV	HMGCLL1:NM_001042406:exon2:c.156A>T:p.E52D,HMGCLL1:NM_001287741:exon2:c.156A>T:p.E52D,HMGCLL1:NM_001287753:exon2:c.156A>T:p.E52D,HMGCLL1:NM_019036:exon3:c.246A>T:p.E82D	-	-	-	-	-	-	-	-	-	-	-	-	-	-	-	-	-	-	-	-	-	-	-	-	-	-	-	-	-	-	-	-	-	-	stomach	1
7	19184940	19184940	A	C	exonic	FERD3L	-	nonsynonymous SNV	FERD3L:NM_152898:exon1:c.46T>G:p.F16V	-	-	-	-	-	-	-	-	-	-	-	-	-	-	-	-	-	-	-	-	-	-	-	-	-	-	-	-	-	-	-	-	-	-	stomach	2
7	19184940	19184940	A	G	exonic	FERD3L	-	nonsynonymous SNV	FERD3L:NM_152898:exon1:c.46T>C:p.F16L	-	-	-	-	-	-	-	-	-	-	-	-	-	-	-	-	-	-	-	-	-	-	-	-	-	-	-	-	-	-	-	-	-	-	stomach	1
3	178928079	178928079	G	A	exonic	PIK3CA	-	nonsynonymous SNV	PIK3CA:NM_006218:exon8:c.1357G>A:p.E453K	-	-	-	-	-	-	-	-	-	-	-	-	-	-	-	-	-	-	-	-	-	-	-	-	-	-	-	-	-	-	-	-	-	-	stomach	3
16	68844172	68844172	G	T	exonic	CDH1	-	nonsynonymous SNV	CDH1:NM_001317184:exon6:c.760G>T:p.D254Y,CDH1:NM_004360:exon6:c.760G>T:p.D254Y	-	-	-	-	-	-	-	-	-	-	-	-	-	-	-	-	-	-	-	-	-	-	-	-	-	-	-	-	-	-	-	-	-	-	stomach	3
5	5239336	5239336	T	C	exonic	ADAMTS16	-	nonsynonymous SNV	ADAMTS16:NM_139056:exon15:c.2227T>C:p.S743P	-	-	-	-	-	-	-	-	-	-	-	-	-	-	-	-	-	-	-	-	-	-	-	-	-	-	-	-	-	-	-	-	-	-	stomach	2
5	5239336	5239336	T	A	exonic	ADAMTS16	-	nonsynonymous SNV	ADAMTS16:NM_139056:exon15:c.2227T>A:p.S743T	-	-	-	-	-	-	-	-	-	-	-	-	-	-	-	-	-	-	-	-	-	-	-	-	-	-	-	-	-	-	-	-	-	-	stomach	1
8	24771944	24771944	C	T	exonic	NEFM	-	nonsynonymous SNV	NEFM:NM_005382:exon1:c.638C>T:p.A213V	-	-	-	-	-	-	-	-	-	-	-	-	-	-	-	-	-	-	-	-	-	-	-	-	-	-	-	-	-	-	-	-	-	-	stomach	3
1	103449740	103449740	A	C	exonic	COL11A1	-	nonsynonymous SNV	COL11A1:NM_080630:exon29:c.2162T>G:p.L721R,COL11A1:NM_001190709:exon30:c.2393T>G:p.L798R,COL11A1:NM_001854:exon31:c.2510T>G:p.L837R,COL11A1:NM_080629:exon31:c.2546T>G:p.L849R	-	-	-	-	-	-	-	-	-	-	-	-	-	-	-	-	-	-	-	-	-	-	-	-	-	-	-	-	-	-	-	-	-	-	stomach	1
1	103449740	103449740	A	T	exonic	COL11A1	-	nonsynonymous SNV	COL11A1:NM_080630:exon29:c.2162T>A:p.L721H,COL11A1:NM_001190709:exon30:c.2393T>A:p.L798H,COL11A1:NM_001854:exon31:c.2510T>A:p.L837H,COL11A1:NM_080629:exon31:c.2546T>A:p.L849H	-	-	-	-	-	-	-	-	-	-	-	-	-	-	-	-	-	-	-	-	-	-	-	-	-	-	-	-	-	-	-	-	-	-	stomach	1
1	103449740	103449740	A	G	exonic	COL11A1	-	nonsynonymous SNV	COL11A1:NM_080630:exon29:c.2162T>C:p.L721P,COL11A1:NM_001190709:exon30:c.2393T>C:p.L798P,COL11A1:NM_001854:exon31:c.2510T>C:p.L837P,COL11A1:NM_080629:exon31:c.2546T>C:p.L849P	-	-	-	-	-	-	-	-	-	-	-	-	-	-	-	-	-	-	-	-	-	-	-	-	-	-	-	-	-	-	-	-	-	-	stomach	1
13	29601027	29601027	A	C	exonic	MTUS2	-	nonsynonymous SNV	MTUS2:NM_001033602:exon1:c.2192A>C:p.K731T,MTUS2:NM_001366650:exon3:c.2192A>C:p.K731T,MTUS2:NM_001366651:exon3:c.2192A>C:p.K731T	-	-	-	-	-	-	-	-	-	-	-	-	-	-	-	-	-	-	-	-	-	-	-	-	-	-	-	-	-	-	-	-	-	-	stomach	3
17	1538704	1538704	C	T	exonic	SCARF1	-	nonsynonymous SNV	SCARF1:NM_003693:exon11:c.1841G>A:p.R614Q	3.99e-06	2.893e-05	7.376e-06	0	3.976e-06	0	0	2.893e-05	0	0	0	0	0	2.904e-05	3.278e-05	2.921e-05	.	-	-	-	-	-	-	-	-	-	-	-	-	-	-	-	-	-	stomach	3
19	22836737	22836737	A	C	exonic	ZNF492	-	nonsynonymous SNV	ZNF492:NM_020855:exon3:c.50A>C:p.K17T	-	-	-	-	-	-	-	-	-	-	-	-	-	-	-	-	-	-	-	-	-	-	-	-	-	-	-	-	-	-	-	-	-	-	stomach	2
19	22836737	22836737	A	G	exonic	ZNF492	-	nonsynonymous SNV	ZNF492:NM_020855:exon3:c.50A>G:p.K17R	-	-	-	-	-	-	-	-	-	-	-	-	-	-	-	-	-	-	-	-	-	-	-	-	-	-	-	-	-	-	-	-	-	-	stomach	1
11	83770433	83770433	C	T	exonic	DLG2	-	nonsynonymous SNV	DLG2:NM_001142700:exon4:c.376G>A:p.V126I,DLG2:NM_001206769:exon5:c.646G>A:p.V216I,DLG2:NM_001300983:exon6:c.529G>A:p.V177I,DLG2:NM_001351276:exon6:c.586G>A:p.V196I,DLG2:NM_001364:exon6:c.529G>A:p.V177I,DLG2:NM_001351275:exon9:c.877G>A:p.V293I,DLG2:NM_001351274:exon10:c.880G>A:p.V294I,DLG2:NM_001142699:exon11:c.844G>A:p.V282I	8.044e-06	2.928e-05	7.412e-06	8.793e-06	7.991e-06	0	0	2.928e-05	0	8.85e-06	0	0	0	2.939e-05	3.323e-05	2.957e-05	.	-	-	-	-	-	-	-	-	-	-	-	-	-	-	-	-	-	stomach	3
13	29933476	29933476	C	T	exonic	MTUS2	-	nonsynonymous SNV	MTUS2:NM_001033602:exon6:c.2983C>T:p.R995W,MTUS2:NM_001366651:exon7:c.2785C>T:p.R929W,MTUS2:NM_001366650:exon8:c.2980C>T:p.R994W	2.071e-05	3.663e-05	1.519e-05	2.734e-05	2.399e-05	0	0	2.955e-05	0	3.663e-05	0	0	0	3.723e-05	3.358e-05	4.033e-05	2.446e-05	-	-	-	-	-	-	-	-	-	-	-	-	-	-	-	-	-	stomach	3
19	47572412	47572412	C	G	exonic	ZC3H4	-	nonsynonymous SNV	ZC3H4:NM_015168:exon14:c.2335G>C:p.E779Q	8.165e-06	3.269e-05	7.495e-06	8.967e-06	2.392e-05	0	3.269e-05	2.899e-05	0	0	0	0	0	3.269e-05	3.286e-05	3.278e-05	6.382e-05	-	-	-	-	-	-	-	-	-	-	-	-	-	-	-	-	-	stomach	3
5	13717530	13717530	T	G	exonic	DNAH5	-	nonsynonymous SNV	DNAH5:NM_001369:exon73:c.12599A>C:p.K4200T	-	-	-	-	-	-	-	-	-	-	-	-	-	-	-	-	-	-	-	-	-	-	-	-	-	-	-	-	-	-	-	-	-	-	stomach	2
5	13717530	13717530	T	C	exonic	DNAH5	-	nonsynonymous SNV	DNAH5:NM_001369:exon73:c.12599A>G:p.K4200R	-	-	-	-	-	-	-	-	-	-	-	-	-	-	-	-	-	-	-	-	-	-	-	-	-	-	-	-	-	-	-	-	-	-	stomach	1
8	68930087	68930087	T	G	exonic	PREX2	-	nonsynonymous SNV	PREX2:NM_024870:exon2:c.148T>G:p.L50V,PREX2:NM_025170:exon2:c.148T>G:p.L50V	-	-	-	-	-	-	-	-	-	-	-	-	-	-	-	-	-	-	-	-	-	-	-	-	-	-	-	-	-	-	-	-	-	-	stomach	2
8	68930087	68930087	T	A	exonic	PREX2	-	nonsynonymous SNV	PREX2:NM_024870:exon2:c.148T>A:p.L50I,PREX2:NM_025170:exon2:c.148T>A:p.L50I	-	-	-	-	-	-	-	-	-	-	-	-	-	-	-	-	-	-	-	-	-	-	-	-	-	-	-	-	-	-	-	-	-	-	stomach	1
1	152800031	152800031	A	C	exonic	LCE1A	-	nonsynonymous SNV	LCE1A:NM_178348:exon1:c.83A>C:p.K28T	-	-	-	-	-	-	-	-	-	-	-	-	-	-	-	-	-	-	-	-	-	-	-	-	-	-	-	-	-	-	-	-	-	-	stomach	2
1	152800031	152800031	A	G	exonic	LCE1A	-	nonsynonymous SNV	LCE1A:NM_178348:exon1:c.83A>G:p.K28R	-	-	-	-	-	-	-	-	-	-	-	-	-	-	-	-	-	-	-	-	-	-	-	-	-	-	-	-	-	-	-	-	-	-	stomach	1
2	125262020	125262020	T	G	exonic	CNTNAP5	-	nonsynonymous SNV	CNTNAP5:NM_001367498:exon8:c.1214T>G:p.L405R,CNTNAP5:NM_130773:exon8:c.1211T>G:p.L404R	-	-	-	-	-	-	-	-	-	-	-	-	-	-	-	-	-	-	-	-	-	-	-	-	-	-	-	-	-	-	-	-	-	-	stomach	2
2	125262020	125262020	T	C	exonic	CNTNAP5	-	nonsynonymous SNV	CNTNAP5:NM_001367498:exon8:c.1214T>C:p.L405P,CNTNAP5:NM_130773:exon8:c.1211T>C:p.L404P	-	-	-	-	-	-	-	-	-	-	-	-	-	-	-	-	-	-	-	-	-	-	-	-	-	-	-	-	-	-	-	-	-	-	stomach	1
15	54306737	54306737	T	G	exonic	UNC13C	-	nonsynonymous SNV	UNC13C:NM_001080534:exon1:c.1637T>G:p.L546R,UNC13C:NM_001329919:exon2:c.1637T>G:p.L546R	4.029e-06	8.914e-06	0	8.808e-06	4.004e-06	0	0	0	0	8.914e-06	0	0	0	9.082e-06	1.126e-05	.	.	-	-	-	-	-	-	-	-	-	-	-	-	-	-	-	-	-	stomach	2
15	54306737	54306737	T	C	exonic	UNC13C	-	nonsynonymous SNV	UNC13C:NM_001080534:exon1:c.1637T>C:p.L546P,UNC13C:NM_001329919:exon2:c.1637T>C:p.L546P	-	-	-	-	-	-	-	-	-	-	-	-	-	-	-	-	-	-	-	-	-	-	-	-	-	-	-	-	-	-	-	-	-	-	stomach	1
1	185958651	185958651	A	C	exonic	HMCN1	-	nonsynonymous SNV	HMCN1:NM_031935:exon21:c.3080A>C:p.K1027T	-	-	-	-	-	-	-	-	-	-	-	-	-	-	-	-	-	-	-	-	-	-	-	-	-	-	-	-	-	-	-	-	-	-	stomach	2
1	185958651	185958651	A	T	exonic	HMCN1	-	nonsynonymous SNV	HMCN1:NM_031935:exon21:c.3080A>T:p.K1027M	-	-	-	-	-	-	-	-	-	-	-	-	-	-	-	-	-	-	-	-	-	-	-	-	-	-	-	-	-	-	-	-	-	-	stomach	1
18	74639294	74639294	C	T	exonic	ZNF236	-	nonsynonymous SNV	ZNF236:NM_001306089:exon24:c.4235C>T:p.T1412M,ZNF236:NM_007345:exon24:c.4229C>T:p.T1410M	8.028e-06	0.0001	7.397e-06	8.777e-06	1.198e-05	0.0001	0	0	0	0	0	0	0	0.0002	0.0001	0.0001	0.0001	-	-	-	-	-	-	-	-	-	-	-	-	-	-	-	-	-	stomach	3
6	96034484	96034484	A	G	exonic	MANEA	-	nonsynonymous SNV	MANEA:NM_024641:exon2:c.169A>G:p.K57E	-	-	-	-	-	-	-	-	-	-	-	-	-	-	-	-	-	-	-	-	-	-	-	-	-	-	-	-	-	-	-	-	-	-	stomach	3
2	210561456	210561456	A	C	exonic	MAP2	-	nonsynonymous SNV	MAP2:NM_001363911:exon8:c.4359A>C:p.E1453D,MAP2:NM_002374:exon8:c.4371A>C:p.E1457D,MAP2:NM_001363910:exon9:c.4359A>C:p.E1453D	-	-	-	-	-	-	-	-	-	-	-	-	-	-	-	-	-	-	-	-	-	-	-	-	-	-	-	-	-	-	-	-	-	-	stomach	3
8	65527645	65527645	T	G	exonic	CYP7B1	-	nonsynonymous SNV	CYP7B1:NM_001324112:exon4:c.995A>C:p.K332T,CYP7B1:NM_004820:exon4:c.995A>C:p.K332T	-	-	-	-	-	-	-	-	-	-	-	-	-	-	-	-	-	-	-	-	-	-	-	-	-	-	-	-	-	-	-	-	-	-	stomach	2
8	65527645	65527645	T	C	exonic	CYP7B1	-	nonsynonymous SNV	CYP7B1:NM_001324112:exon4:c.995A>G:p.K332R,CYP7B1:NM_004820:exon4:c.995A>G:p.K332R	-	-	-	-	-	-	-	-	-	-	-	-	-	-	-	-	-	-	-	-	-	-	-	-	-	-	-	-	-	-	-	-	-	-	stomach	1
12	81283099	81283099	T	G	exonic	LIN7A	-	nonsynonymous SNV	LIN7A:NM_004664:exon2:c.132A>C:p.E44D	-	-	-	-	-	-	-	-	-	-	-	-	-	-	-	-	-	-	-	-	-	-	-	-	-	-	-	-	-	-	-	-	-	-	stomach	3
3	41266097	41266097	G	C	exonic	CTNNB1	-	nonsynonymous SNV	CTNNB1:NM_001098209:exon3:c.94G>C:p.D32H,CTNNB1:NM_001098210:exon3:c.94G>C:p.D32H,CTNNB1:NM_001904:exon3:c.94G>C:p.D32H,CTNNB1:NM_001330729:exon4:c.73G>C:p.D25H	-	-	-	-	-	-	-	-	-	-	-	-	-	-	-	-	-	-	-	-	-	-	-	-	-	-	-	-	-	-	-	-	-	-	stomach	2
3	41266097	41266097	G	T	exonic	CTNNB1	-	nonsynonymous SNV	CTNNB1:NM_001098209:exon3:c.94G>T:p.D32Y,CTNNB1:NM_001098210:exon3:c.94G>T:p.D32Y,CTNNB1:NM_001904:exon3:c.94G>T:p.D32Y,CTNNB1:NM_001330729:exon4:c.73G>T:p.D25Y	-	-	-	-	-	-	-	-	-	-	-	-	-	-	-	-	-	-	-	-	-	-	-	-	-	-	-	-	-	-	-	-	-	-	stomach	1
11	55606243	55606243	A	G	exonic	OR5D16	-	nonsynonymous SNV	OR5D16:NM_001005496:exon1:c.16A>G:p.R6G	4.077e-06	8.977e-06	7.552e-06	0	3.977e-06	0	0	0	0	8.977e-06	0	0	0	9.149e-06	1.136e-05	9.962e-06	.	-	-	-	-	-	-	-	-	-	-	-	-	-	-	-	-	-	stomach	3
17	7577082	7577082	C	T	exonic	TP53	-	nonsynonymous SNV	TP53:NM_001126115:exon4:c.460G>A:p.E154K,TP53:NM_001126116:exon4:c.460G>A:p.E154K,TP53:NM_001126117:exon4:c.460G>A:p.E154K,TP53:NM_001276697:exon4:c.379G>A:p.E127K,TP53:NM_001276698:exon4:c.379G>A:p.E127K,TP53:NM_001276699:exon4:c.379G>A:p.E127K,TP53:NM_001126118:exon7:c.739G>A:p.E247K,TP53:NM_000546:exon8:c.856G>A:p.E286K,TP53:NM_001126112:exon8:c.856G>A:p.E286K,TP53:NM_001126113:exon8:c.856G>A:…	-	-	-	-	-	-	-	-	-	-	-	-	-	-	-	-	-	-	-	-	-	-	-	-	-	-	-	-	-	-	-	-	-	-	stomach	3
9	16436469	16436469	T	G	exonic	BNC2	-	nonsynonymous SNV	BNC2:NM_001317939:exon5:c.1597A>C:p.S533R,BNC2:NM_001317940:exon5:c.1438A>C:p.S480R,BNC2:NM_017637:exon6:c.1723A>C:p.S575R	-	-	-	-	-	-	-	-	-	-	-	-	-	-	-	-	-	-	-	-	-	-	-	-	-	-	-	-	-	-	-	-	-	-	stomach	3
17	7578479	7578479	G	T	exonic	TP53	-	nonsynonymous SNV	TP53:NM_001126115:exon1:c.55C>A:p.P19T,TP53:NM_001126116:exon1:c.55C>A:p.P19T,TP53:NM_001126117:exon1:c.55C>A:p.P19T,TP53:NM_001126118:exon4:c.334C>A:p.P112T,TP53:NM_000546:exon5:c.451C>A:p.P151T,TP53:NM_001126112:exon5:c.451C>A:p.P151T,TP53:NM_001126113:exon5:c.451C>A:p.P151T,TP53:NM_001126114:exon5:c.451C>A:p.P151T,TP53:NM_001276695:exon5:c.334C>A:p.P112T,TP53:NM_001276696:exon5:c.334C>A:p.P112…	-	-	-	-	-	-	-	-	-	-	-	-	-	-	-	-	-	-	-	-	-	-	-	-	-	-	-	-	-	-	-	-	-	-	stomach	2
17	7578479	7578479	G	C	exonic	TP53	-	nonsynonymous SNV	TP53:NM_001126115:exon1:c.55C>G:p.P19A,TP53:NM_001126116:exon1:c.55C>G:p.P19A,TP53:NM_001126117:exon1:c.55C>G:p.P19A,TP53:NM_001126118:exon4:c.334C>G:p.P112A,TP53:NM_000546:exon5:c.451C>G:p.P151A,TP53:NM_001126112:exon5:c.451C>G:p.P151A,TP53:NM_001126113:exon5:c.451C>G:p.P151A,TP53:NM_001126114:exon5:c.451C>G:p.P151A,TP53:NM_001276695:exon5:c.334C>G:p.P112A,TP53:NM_001276696:exon5:c.334C>G:p.P112…	-	-	-	-	-	-	-	-	-	-	-	-	-	-	-	-	-	-	-	-	-	-	-	-	-	-	-	-	-	-	-	-	-	-	stomach	1
11	48146561	48146561	G	A	exonic	PTPRJ	-	nonsynonymous SNV	PTPRJ:NM_001098503:exon6:c.916G>A:p.A306T,PTPRJ:NM_002843:exon6:c.916G>A:p.A306T	1.592e-05	6.157e-05	7.363e-06	2.599e-05	1.59e-05	6.157e-05	0	0	0	8.805e-06	4.63e-05	0	0.0002	8.322e-05	6.171e-05	6.715e-05	.	-	-	-	-	-	-	-	-	-	-	-	-	-	-	-	-	-	stomach	3
16	849007	849007	C	T	exonic	GNG13	-	nonsynonymous SNV	GNG13:NM_016541:exon2:c.71G>A:p.R24Q	3.207e-05	0.0001	4.436e-05	1.751e-05	3.977e-05	0	3.268e-05	8.686e-05	0.0001	8.92e-06	4.64e-05	0	0	0.0001	6.561e-05	0.0001	0.0001	6.38e-05	0.0006	5.737e-05	7.187e-05	6.366e-05	0	.	0	0.0006	6.488e-05	0	0	0	0.0007	0.0006	.	.	stomach	3
1	197390846	197390846	T	G	exonic	CRB1	-	nonsynonymous SNV	CRB1:NM_001193640:exon4:c.1552T>G:p.F518V,CRB1:NM_001257966:exon6:c.1888T>G:p.F630V,CRB1:NM_201253:exon6:c.1888T>G:p.F630V,CRB1:NM_001257965:exon8:c.1681T>G:p.F561V	-	-	-	-	-	-	-	-	-	-	-	-	-	-	-	-	-	-	-	-	-	-	-	-	-	-	-	-	-	-	-	-	-	-	stomach	3
10	134942261	134942261	G	A	exonic	ADGRA1	-	nonsynonymous SNV	ADGRA1:NM_001291085:exon4:c.638G>A:p.R213H,ADGRA1:NM_001083909:exon7:c.929G>A:p.R310H	-	-	-	-	-	-	-	-	-	-	-	-	-	-	-	-	-	-	-	-	-	-	-	-	-	-	-	-	-	-	-	-	-	-	stomach	3
14	86089507	86089507	C	T	exonic	FLRT2	-	nonsynonymous SNV	FLRT2:NM_001346143:exon2:c.1649C>T:p.A550V,FLRT2:NM_001346144:exon2:c.1649C>T:p.A550V,FLRT2:NM_001346145:exon2:c.1649C>T:p.A550V,FLRT2:NM_001346146:exon2:c.1649C>T:p.A550V,FLRT2:NM_013231:exon2:c.1649C>T:p.A550V	5.417e-05	0.0002	5.064e-05	5.823e-05	5.569e-05	0	4.176e-05	0.0002	0.0002	9.829e-06	0	0	0.0002	0.0002	0.0002	0.0002	0.0002	-	-	-	-	-	-	-	-	-	-	-	-	-	-	-	-	-	stomach	3
2	212426722	212426722	A	G	exonic	ERBB4	-	nonsynonymous SNV	ERBB4:NM_001042599:exon20:c.2393T>C:p.L798P,ERBB4:NM_005235:exon20:c.2393T>C:p.L798P	-	-	-	-	-	-	-	-	-	-	-	-	-	-	-	-	-	-	-	-	-	-	-	-	-	-	-	-	-	-	-	-	-	-	stomach	1
2	212426722	212426722	A	C	exonic	ERBB4	-	nonsynonymous SNV	ERBB4:NM_001042599:exon20:c.2393T>G:p.L798R,ERBB4:NM_005235:exon20:c.2393T>G:p.L798R	-	-	-	-	-	-	-	-	-	-	-	-	-	-	-	-	-	-	-	-	-	-	-	-	-	-	-	-	-	-	-	-	-	-	stomach	1
2	212426722	212426722	A	T	exonic	ERBB4	-	nonsynonymous SNV	ERBB4:NM_001042599:exon20:c.2393T>A:p.L798H,ERBB4:NM_005235:exon20:c.2393T>A:p.L798H	-	-	-	-	-	-	-	-	-	-	-	-	-	-	-	-	-	-	-	-	-	-	-	-	-	-	-	-	-	-	-	-	-	-	stomach	1
10	73405660	73405660	G	A	exonic	CDH23	-	nonsynonymous SNV	CDH23:NM_001171930:exon12:c.1213G>A:p.V405I,CDH23:NM_001171931:exon12:c.1213G>A:p.V405I,CDH23:NM_022124:exon12:c.1213G>A:p.V405I,CDH23:NM_052836:exon12:c.1213G>A:p.V405I	7.637e-05	0.0001	0.0001	4.394e-05	7.588e-05	6.465e-05	0.0001	8.725e-05	0	7.976e-05	0	0	0.0003	0.0001	0.0001	0.0001	0.0002	-	-	-	-	-	-	-	-	-	-	-	-	-	-	-	-	-	stomach	3
6	72678732	72678732	A	G	exonic	RIMS1	-	nonsynonymous SNV	RIMS1:NM_001350411:exon2:c.211A>G:p.R71G,RIMS1:NM_001350413:exon2:c.211A>G:p.R71G,RIMS1:NM_014989:exon2:c.211A>G:p.R71G	-	-	-	-	-	-	-	-	-	-	-	-	-	-	-	-	-	-	-	-	-	-	-	-	-	-	-	-	-	-	-	-	-	-	stomach	3
6	133783490	133783490	T	G	exonic	EYA4	-	nonsynonymous SNV	EYA4:NM_001301012:exon6:c.293T>G:p.L98R,EYA4:NM_001370459:exon6:c.293T>G:p.L98R,EYA4:NM_001370458:exon7:c.386T>G:p.L129R,EYA4:NM_172103:exon7:c.386T>G:p.L129R,EYA4:NM_001301013:exon8:c.455T>G:p.L152R,EYA4:NM_004100:exon8:c.455T>G:p.L152R,EYA4:NM_172105:exon8:c.455T>G:p.L152R	-	-	-	-	-	-	-	-	-	-	-	-	-	-	-	-	-	-	-	-	-	-	-	-	-	-	-	-	-	-	-	-	-	-	stomach	2
6	133783490	133783490	T	C	exonic	EYA4	-	nonsynonymous SNV	EYA4:NM_001301012:exon6:c.293T>C:p.L98P,EYA4:NM_001370459:exon6:c.293T>C:p.L98P,EYA4:NM_001370458:exon7:c.386T>C:p.L129P,EYA4:NM_172103:exon7:c.386T>C:p.L129P,EYA4:NM_001301013:exon8:c.455T>C:p.L152P,EYA4:NM_004100:exon8:c.455T>C:p.L152P,EYA4:NM_172105:exon8:c.455T>C:p.L152P	-	-	-	-	-	-	-	-	-	-	-	-	-	-	-	-	-	-	-	-	-	-	-	-	-	-	-	-	-	-	-	-	-	-	stomach	1
12	130884319	130884319	A	C	exonic	RIMBP2	-	nonsynonymous SNV	RIMBP2:NM_015347:exon19:c.3037T>G:p.F1013V,RIMBP2:NM_001351227:exon20:c.3088T>G:p.F1030V,RIMBP2:NM_001351226:exon21:c.3088T>G:p.F1030V,RIMBP2:NM_001351228:exon21:c.3088T>G:p.F1030V,RIMBP2:NM_001351229:exon21:c.3088T>G:p.F1030V,RIMBP2:NM_001351230:exon21:c.3088T>G:p.F1030V,RIMBP2:NM_001351231:exon21:c.3088T>G:p.F1030V	-	-	-	-	-	-	-	-	-	-	-	-	-	-	-	-	-	-	-	-	-	-	-	-	-	-	-	-	-	-	-	-	-	-	stomach	2
12	130884319	130884319	A	T	exonic	RIMBP2	-	nonsynonymous SNV	RIMBP2:NM_015347:exon19:c.3037T>A:p.F1013I,RIMBP2:NM_001351227:exon20:c.3088T>A:p.F1030I,RIMBP2:NM_001351226:exon21:c.3088T>A:p.F1030I,RIMBP2:NM_001351228:exon21:c.3088T>A:p.F1030I,RIMBP2:NM_001351229:exon21:c.3088T>A:p.F1030I,RIMBP2:NM_001351230:exon21:c.3088T>A:p.F1030I,RIMBP2:NM_001351231:exon21:c.3088T>A:p.F1030I	-	-	-	-	-	-	-	-	-	-	-	-	-	-	-	-	-	-	-	-	-	-	-	-	-	-	-	-	-	-	-	-	-	-	stomach	1
2	168102105	168102105	A	T	exonic	XIRP2	-	nonsynonymous SNV	XIRP2:NM_001199144:exon7:c.3537A>T:p.E1179D,XIRP2:NM_152381:exon9:c.4203A>T:p.E1401D	-	-	-	-	-	-	-	-	-	-	-	-	-	-	-	-	-	-	-	-	-	-	-	-	-	-	-	-	-	-	-	-	-	-	stomach	2
2	168102105	168102105	A	C	exonic	XIRP2	-	nonsynonymous SNV	XIRP2:NM_001199144:exon7:c.3537A>C:p.E1179D,XIRP2:NM_152381:exon9:c.4203A>C:p.E1401D	-	-	-	-	-	-	-	-	-	-	-	-	-	-	-	-	-	-	-	-	-	-	-	-	-	-	-	-	-	-	-	-	-	-	stomach	1
16	65016134	65016134	T	G	exonic	CDH11	-	nonsynonymous SNV	CDH11:NM_001330576:exon7:c.692A>C:p.K231T,CDH11:NM_001308392:exon8:c.1070A>C:p.K357T,CDH11:NM_001797:exon8:c.1070A>C:p.K357T	-	-	-	-	-	-	-	-	-	-	-	-	-	-	-	-	-	-	-	-	-	-	-	-	-	-	-	-	-	-	-	-	-	-	stomach	3
17	7577570	7577570	C	T	exonic	TP53	-	nonsynonymous SNV	TP53:NM_001126115:exon3:c.315G>A:p.M105I,TP53:NM_001126116:exon3:c.315G>A:p.M105I,TP53:NM_001126117:exon3:c.315G>A:p.M105I,TP53:NM_001276697:exon3:c.234G>A:p.M78I,TP53:NM_001276698:exon3:c.234G>A:p.M78I,TP53:NM_001276699:exon3:c.234G>A:p.M78I,TP53:NM_001126118:exon6:c.594G>A:p.M198I,TP53:NM_000546:exon7:c.711G>A:p.M237I,TP53:NM_001126112:exon7:c.711G>A:p.M237I,TP53:NM_001126113:exon7:c.711G>A:p.M…	3.976e-06	5.437e-05	7.358e-06	0	7.952e-06	0	0	0	5.437e-05	0	0	0	0	5.438e-05	.	5.652e-05	.	-	-	-	-	-	-	-	-	-	-	-	-	-	-	-	-	-	stomach	3
1	13744663	13744663	A	C	exonic	PRAMEF20	-	nonsynonymous SNV	PRAMEF20:NM_001099852:exon3:c.354A>C:p.E118D	-	-	-	-	-	-	-	-	-	-	-	-	-	-	-	-	-	-	-	-	-	-	-	-	-	-	-	-	-	-	-	-	-	-	stomach	3
12	108045467	108045467	A	C	exonic	BTBD11	-	nonsynonymous SNV	BTBD11:NM_001017523:exon14:c.1619A>C:p.K540T,BTBD11:NM_001347943:exon14:c.2651A>C:p.K884T,BTBD11:NM_001347944:exon14:c.1553A>C:p.K518T,BTBD11:NM_001018072:exon16:c.3008A>C:p.K1003T	-	-	-	-	-	-	-	-	-	-	-	-	-	-	-	-	-	-	-	-	-	-	-	-	-	-	-	-	-	-	-	-	-	-	stomach	2
12	108045467	108045467	A	T	exonic	BTBD11	-	nonsynonymous SNV	BTBD11:NM_001017523:exon14:c.1619A>T:p.K540M,BTBD11:NM_001347943:exon14:c.2651A>T:p.K884M,BTBD11:NM_001347944:exon14:c.1553A>T:p.K518M,BTBD11:NM_001018072:exon16:c.3008A>T:p.K1003M	-	-	-	-	-	-	-	-	-	-	-	-	-	-	-	-	-	-	-	-	-	-	-	-	-	-	-	-	-	-	-	-	-	-	stomach	1
14	26917982	26917982	A	C	exonic	NOVA1	-	nonsynonymous SNV	NOVA1:NM_001366394:exon4:c.524T>G:p.L175R,NOVA1:NM_001366397:exon4:c.269T>G:p.L90R,NOVA1:NM_006489:exon4:c.635T>G:p.L212R,NOVA1:NM_001366390:exon5:c.269T>G:p.L90R,NOVA1:NM_001366392:exon5:c.704T>G:p.L235R,NOVA1:NM_001366393:exon5:c.596T>G:p.L199R,NOVA1:NM_001366398:exon5:c.341T>G:p.L114R,NOVA1:NM_002515:exon5:c.707T>G:p.L236R,NOVA1:NM_001366391:exon6:c.341T>G:p.L114R,NOVA1:NM_001366395:exon6:c.34…	-	-	-	-	-	-	-	-	-	-	-	-	-	-	-	-	-	-	-	-	-	-	-	-	-	-	-	-	-	-	-	-	-	-	stomach	3
8	113933896	113933896	T	G	exonic	CSMD3	-	nonsynonymous SNV	CSMD3:NM_001363185:exon8:c.1203A>C:p.E401D,CSMD3:NM_052900:exon9:c.1281A>C:p.E427D,CSMD3:NM_198123:exon10:c.1593A>C:p.E531D,CSMD3:NM_198124:exon11:c.1473A>C:p.E491D	-	-	-	-	-	-	-	-	-	-	-	-	-	-	-	-	-	-	-	-	-	-	-	-	-	-	-	-	-	-	-	-	-	-	stomach	2
8	113933896	113933896	T	A	exonic	CSMD3	-	nonsynonymous SNV	CSMD3:NM_001363185:exon8:c.1203A>T:p.E401D,CSMD3:NM_052900:exon9:c.1281A>T:p.E427D,CSMD3:NM_198123:exon10:c.1593A>T:p.E531D,CSMD3:NM_198124:exon11:c.1473A>T:p.E491D	-	-	-	-	-	-	-	-	-	-	-	-	-	-	-	-	-	-	-	-	-	-	-	-	-	-	-	-	-	-	-	-	-	-	stomach	1
3	178916891	178916891	G	A	exonic	PIK3CA	-	nonsynonymous SNV	PIK3CA:NM_006218:exon2:c.278G>A:p.R93Q	-	-	-	-	-	-	-	-	-	-	-	-	-	-	-	-	-	-	-	-	-	-	-	-	-	-	-	-	-	-	-	-	-	-	stomach	3
17	7578413	7578413	C	T	exonic	TP53	-	nonsynonymous SNV	TP53:NM_001126115:exon1:c.121G>A:p.V41M,TP53:NM_001126116:exon1:c.121G>A:p.V41M,TP53:NM_001126117:exon1:c.121G>A:p.V41M,TP53:NM_001276697:exon1:c.40G>A:p.V14M,TP53:NM_001276698:exon1:c.40G>A:p.V14M,TP53:NM_001276699:exon1:c.40G>A:p.V14M,TP53:NM_001126118:exon4:c.400G>A:p.V134M,TP53:NM_000546:exon5:c.517G>A:p.V173M,TP53:NM_001126112:exon5:c.517G>A:p.V173M,TP53:NM_001126113:exon5:c.517G>A:p.V173M,T…	-	-	-	-	-	-	-	-	-	-	-	-	-	-	-	-	-	-	-	-	-	-	-	-	-	-	-	-	-	-	-	-	-	-	stomach	2
17	7578413	7578413	C	A	exonic	TP53	-	nonsynonymous SNV	TP53:NM_001126115:exon1:c.121G>T:p.V41L,TP53:NM_001126116:exon1:c.121G>T:p.V41L,TP53:NM_001126117:exon1:c.121G>T:p.V41L,TP53:NM_001276697:exon1:c.40G>T:p.V14L,TP53:NM_001276698:exon1:c.40G>T:p.V14L,TP53:NM_001276699:exon1:c.40G>T:p.V14L,TP53:NM_001126118:exon4:c.400G>T:p.V134L,TP53:NM_000546:exon5:c.517G>T:p.V173L,TP53:NM_001126112:exon5:c.517G>T:p.V173L,TP53:NM_001126113:exon5:c.517G>T:p.V173L,T…	-	-	-	-	-	-	-	-	-	-	-	-	-	-	-	-	-	-	-	-	-	-	-	-	-	-	-	-	-	-	-	-	-	-	stomach	1
14	20586464	20586464	A	C	exonic	OR4K17	-	nonsynonymous SNV	OR4K17:NM_001004715:exon1:c.815A>C:p.K272T	-	-	-	-	-	-	-	-	-	-	-	-	-	-	-	-	-	-	-	-	-	-	-	-	-	-	-	-	-	-	-	-	-	-	stomach	3
12	25380283	25380283	C	T	exonic	KRAS	-	nonsynonymous SNV	KRAS:NM_001369786:exon3:c.175G>A:p.A59T,KRAS:NM_001369787:exon3:c.175G>A:p.A59T,KRAS:NM_004985:exon3:c.175G>A:p.A59T,KRAS:NM_033360:exon3:c.175G>A:p.A59T	-	-	-	-	-	-	-	-	-	-	-	-	-	-	-	-	-	-	-	-	-	-	-	-	-	-	-	-	-	-	-	-	-	-	stomach	3
3	178936091	178936091	G	A	exonic	PIK3CA	-	nonsynonymous SNV	PIK3CA:NM_006218:exon10:c.1633G>A:p.E545K	4.032e-06	8.879e-06	0	8.821e-06	4.004e-06	0	0	0	0	8.879e-06	0	0	0	9.045e-06	1.127e-05	.	.	-	-	-	-	-	-	-	-	-	-	-	-	-	-	-	-	-	urinary_tract	27
3	178936091	178936091	G	C	exonic	PIK3CA	-	nonsynonymous SNV	PIK3CA:NM_006218:exon10:c.1633G>C:p.E545Q	-	-	-	-	-	-	-	-	-	-	-	-	-	-	-	-	-	-	-	-	-	-	-	-	-	-	-	-	-	-	-	-	-	-	urinary_tract	3
4	1803568	1803568	C	G	exonic	FGFR3	-	nonsynonymous SNV	FGFR3:NM_000142:exon7:c.746C>G:p.S249C,FGFR3:NM_001163213:exon7:c.746C>G:p.S249C,FGFR3:NM_001354809:exon7:c.746C>G:p.S249C,FGFR3:NM_001354810:exon7:c.746C>G:p.S249C,FGFR3:NM_022965:exon7:c.746C>G:p.S249C	0	.	0	0	7.977e-06	0	0	0	0	0	0	0	0	.	.	.	.	-	-	-	-	-	-	-	-	-	-	-	-	-	-	-	-	-	urinary_tract	29
17	37868208	37868208	C	T	exonic	ERBB2	-	nonsynonymous SNV	ERBB2:NM_001289937:exon8:c.929C>T:p.S310F,ERBB2:NM_004448:exon8:c.929C>T:p.S310F,ERBB2:NM_001005862:exon11:c.839C>T:p.S280F,ERBB2:NM_001289938:exon11:c.839C>T:p.S280F,ERBB2:NM_001289936:exon12:c.884C>T:p.S295F	-	-	-	-	-	-	-	-	-	-	-	-	-	-	-	-	-	-	-	-	-	-	-	-	-	-	-	-	-	-	-	-	-	-	urinary_tract	19
17	37868208	37868208	C	A	exonic	ERBB2	-	nonsynonymous SNV	ERBB2:NM_001289937:exon8:c.929C>A:p.S310Y,ERBB2:NM_004448:exon8:c.929C>A:p.S310Y,ERBB2:NM_001005862:exon11:c.839C>A:p.S280Y,ERBB2:NM_001289938:exon11:c.839C>A:p.S280Y,ERBB2:NM_001289936:exon12:c.884C>A:p.S295Y	-	-	-	-	-	-	-	-	-	-	-	-	-	-	-	-	-	-	-	-	-	-	-	-	-	-	-	-	-	-	-	-	-	-	urinary_tract	3
3	178936082	178936082	G	A	exonic	PIK3CA	-	nonsynonymous SNV	PIK3CA:NM_006218:exon10:c.1624G>A:p.E542K	-	-	-	-	-	-	-	-	-	-	-	-	-	-	-	-	-	-	-	-	-	-	-	-	-	-	-	-	-	-	-	-	-	-	urinary_tract	18
17	7577538	7577538	C	T	exonic	TP53	-	nonsynonymous SNV	TP53:NM_001126115:exon3:c.347G>A:p.R116Q,TP53:NM_001126116:exon3:c.347G>A:p.R116Q,TP53:NM_001126117:exon3:c.347G>A:p.R116Q,TP53:NM_001276697:exon3:c.266G>A:p.R89Q,TP53:NM_001276698:exon3:c.266G>A:p.R89Q,TP53:NM_001276699:exon3:c.266G>A:p.R89Q,TP53:NM_001126118:exon6:c.626G>A:p.R209Q,TP53:NM_000546:exon7:c.743G>A:p.R248Q,TP53:NM_001126112:exon7:c.743G>A:p.R248Q,TP53:NM_001126113:exon7:c.743G>A:p.R…	1.193e-05	2.637e-05	7.358e-06	1.731e-05	2.386e-05	0	0	0	0	2.637e-05	0	0	0	2.687e-05	2.233e-05	1.947e-05	2.338e-05	-	-	-	-	-	-	-	-	-	-	-	-	-	-	-	-	-	urinary_tract	17
17	7577538	7577538	C	G	exonic	TP53	-	nonsynonymous SNV	TP53:NM_001126115:exon3:c.347G>C:p.R116P,TP53:NM_001126116:exon3:c.347G>C:p.R116P,TP53:NM_001126117:exon3:c.347G>C:p.R116P,TP53:NM_001276697:exon3:c.266G>C:p.R89P,TP53:NM_001276698:exon3:c.266G>C:p.R89P,TP53:NM_001276699:exon3:c.266G>C:p.R89P,TP53:NM_001126118:exon6:c.626G>C:p.R209P,TP53:NM_000546:exon7:c.743G>C:p.R248P,TP53:NM_001126112:exon7:c.743G>C:p.R248P,TP53:NM_001126113:exon7:c.743G>C:p.R…	-	-	-	-	-	-	-	-	-	-	-	-	-	-	-	-	-	-	-	-	-	-	-	-	-	-	-	-	-	-	-	-	-	-	urinary_tract	1
17	7577099	7577099	C	G	exonic	TP53	-	nonsynonymous SNV	TP53:NM_001126115:exon4:c.443G>C:p.R148T,TP53:NM_001126116:exon4:c.443G>C:p.R148T,TP53:NM_001126117:exon4:c.443G>C:p.R148T,TP53:NM_001276697:exon4:c.362G>C:p.R121T,TP53:NM_001276698:exon4:c.362G>C:p.R121T,TP53:NM_001276699:exon4:c.362G>C:p.R121T,TP53:NM_001126118:exon7:c.722G>C:p.R241T,TP53:NM_000546:exon8:c.839G>C:p.R280T,TP53:NM_001126112:exon8:c.839G>C:p.R280T,TP53:NM_001126113:exon8:c.839G>C:…	-	-	-	-	-	-	-	-	-	-	-	-	-	-	-	-	-	-	-	-	-	-	-	-	-	-	-	-	-	-	-	-	-	-	urinary_tract	11
17	7577099	7577099	C	T	exonic	TP53	-	nonsynonymous SNV	TP53:NM_001126115:exon4:c.443G>A:p.R148K,TP53:NM_001126116:exon4:c.443G>A:p.R148K,TP53:NM_001126117:exon4:c.443G>A:p.R148K,TP53:NM_001276697:exon4:c.362G>A:p.R121K,TP53:NM_001276698:exon4:c.362G>A:p.R121K,TP53:NM_001276699:exon4:c.362G>A:p.R121K,TP53:NM_001126118:exon7:c.722G>A:p.R241K,TP53:NM_000546:exon8:c.839G>A:p.R280K,TP53:NM_001126112:exon8:c.839G>A:p.R280K,TP53:NM_001126113:exon8:c.839G>A:…	-	-	-	-	-	-	-	-	-	-	-	-	-	-	-	-	-	-	-	-	-	-	-	-	-	-	-	-	-	-	-	-	-	-	urinary_tract	4
9	137328351	137328351	C	T	exonic	RXRA	-	nonsynonymous SNV	RXRA:NM_001291921:exon9:c.989C>T:p.S330F,RXRA:NM_001291920:exon10:c.1199C>T:p.S400F,RXRA:NM_002957:exon10:c.1280C>T:p.S427F	-	-	-	-	-	-	-	-	-	-	-	-	-	-	-	-	-	-	-	-	-	-	-	-	-	-	-	-	-	-	-	-	-	-	urinary_tract	11
9	137328351	137328351	C	A	exonic	RXRA	-	nonsynonymous SNV	RXRA:NM_001291921:exon9:c.989C>A:p.S330Y,RXRA:NM_001291920:exon10:c.1199C>A:p.S400Y,RXRA:NM_002957:exon10:c.1280C>A:p.S427Y	-	-	-	-	-	-	-	-	-	-	-	-	-	-	-	-	-	-	-	-	-	-	-	-	-	-	-	-	-	-	-	-	-	-	urinary_tract	2
17	7577085	7577085	C	T	exonic	TP53	-	nonsynonymous SNV	TP53:NM_001126115:exon4:c.457G>A:p.E153K,TP53:NM_001126116:exon4:c.457G>A:p.E153K,TP53:NM_001126117:exon4:c.457G>A:p.E153K,TP53:NM_001276697:exon4:c.376G>A:p.E126K,TP53:NM_001276698:exon4:c.376G>A:p.E126K,TP53:NM_001276699:exon4:c.376G>A:p.E126K,TP53:NM_001126118:exon7:c.736G>A:p.E246K,TP53:NM_000546:exon8:c.853G>A:p.E285K,TP53:NM_001126112:exon8:c.853G>A:p.E285K,TP53:NM_001126113:exon8:c.853G>A:…	-	-	-	-	-	-	-	-	-	-	-	-	-	-	-	-	-	-	-	-	-	-	-	-	-	-	-	-	-	-	-	-	-	-	urinary_tract	10
3	184870595	184870595	G	A	exonic	C3orf70	-	nonsynonymous SNV	C3orf70:NM_001025266:exon1:c.17C>T:p.S6L	0	.	0	0	3.986e-06	0	0	0	0	0	0	0	0	.	.	.	.	3.233e-05	.	0	7.296e-05	3.183e-05	0	.	0	0	0	0.0003	0	0	.	.	.	.	urinary_tract	8
3	184870595	184870595	G	C	exonic	C3orf70	-	nonsynonymous SNV	C3orf70:NM_001025266:exon1:c.17C>G:p.S6W	-	-	-	-	-	-	-	-	-	-	-	-	-	-	-	-	-	3.233e-05	6.558e-05	5.805e-05	0	3.183e-05	0	.	0	0	6.558e-05	0	0	0	.	7.432e-05	.	.	urinary_tract	1
19	45867687	45867687	T	C	exonic	ERCC2	-	nonsynonymous SNV	ERCC2:NM_001130867:exon7:c.641A>G:p.N214S,ERCC2:NM_000400:exon8:c.713A>G:p.N238S	-	-	-	-	-	-	-	-	-	-	-	-	-	-	-	-	-	-	-	-	-	-	-	-	-	-	-	-	-	-	-	-	-	-	urinary_tract	9
4	1806099	1806099	A	G	exonic	FGFR3	-	nonsynonymous SNV	FGFR3:NM_000142:exon9:c.1118A>G:p.Y373C,FGFR3:NM_001163213:exon9:c.1124A>G:p.Y375C,FGFR3:NM_001354809:exon9:c.1118A>G:p.Y373C,FGFR3:NM_001354810:exon9:c.1118A>G:p.Y373C	-	-	-	-	-	-	-	-	-	-	-	-	-	-	-	-	-	-	-	-	-	-	-	-	-	-	-	-	-	-	-	-	-	-	urinary_tract	8
7	17375399	17375399	G	C	exonic	AHR	-	nonsynonymous SNV	AHR:NM_001621:exon9:c.1149G>C:p.Q383H	-	-	-	-	-	-	-	-	-	-	-	-	-	-	-	-	-	-	-	-	-	-	-	-	-	-	-	-	-	-	-	-	-	-	urinary_tract	7
7	17375399	17375399	G	T	exonic	AHR	-	nonsynonymous SNV	AHR:NM_001621:exon9:c.1149G>T:p.Q383H	-	-	-	-	-	-	-	-	-	-	-	-	-	-	-	-	-	-	-	-	-	-	-	-	-	-	-	-	-	-	-	-	-	-	urinary_tract	1
4	153247289	153247289	G	C	exonic	FBXW7	-	nonsynonymous SNV	FBXW7:NM_001013415:exon9:c.1159C>G:p.R387G,FBXW7:NM_018315:exon9:c.1273C>G:p.R425G,FBXW7:NM_033632:exon10:c.1513C>G:p.R505G,FBXW7:NM_001349798:exon12:c.1513C>G:p.R505G	-	-	-	-	-	-	-	-	-	-	-	-	-	-	-	-	-	-	-	-	-	-	-	-	-	-	-	-	-	-	-	-	-	-	urinary_tract	8
12	25398284	25398284	C	T	exonic	KRAS	-	nonsynonymous SNV	KRAS:NM_001369786:exon2:c.35G>A:p.G12D,KRAS:NM_001369787:exon2:c.35G>A:p.G12D,KRAS:NM_004985:exon2:c.35G>A:p.G12D,KRAS:NM_033360:exon2:c.35G>A:p.G12D	4.011e-06	8.883e-06	0	8.726e-06	1.988e-05	0	0	0	0	8.883e-06	0	0	0	9.051e-06	1.127e-05	9.832e-06	2.369e-05	-	-	-	-	-	-	-	-	-	-	-	-	-	-	-	-	-	urinary_tract	6
12	25398284	25398284	C	A	exonic	KRAS	-	nonsynonymous SNV	KRAS:NM_001369786:exon2:c.35G>T:p.G12V,KRAS:NM_001369787:exon2:c.35G>T:p.G12V,KRAS:NM_004985:exon2:c.35G>T:p.G12V,KRAS:NM_033360:exon2:c.35G>T:p.G12V	0	.	0	0	3.976e-06	0	0	0	0	0	0	0	0	.	.	.	.	-	-	-	-	-	-	-	-	-	-	-	-	-	-	-	-	-	urinary_tract	2
3	178952085	178952085	A	G	exonic	PIK3CA	-	nonsynonymous SNV	PIK3CA:NM_006218:exon21:c.3140A>G:p.H1047R	4.028e-06	8.91e-06	0	8.802e-06	3.998e-06	0	0	0	0	8.91e-06	0	0	0	9.079e-06	1.123e-05	.	.	-	-	-	-	-	-	-	-	-	-	-	-	-	-	-	-	-	urinary_tract	5
3	178952085	178952085	A	T	exonic	PIK3CA	-	nonsynonymous SNV	PIK3CA:NM_006218:exon21:c.3140A>T:p.H1047L	4.028e-06	8.91e-06	0	8.802e-06	3.998e-06	0	0	0	0	8.91e-06	0	0	0	9.079e-06	1.123e-05	.	.	-	-	-	-	-	-	-	-	-	-	-	-	-	-	-	-	-	urinary_tract	2
17	7577121	7577121	G	A	exonic	TP53	-	nonsynonymous SNV	TP53:NM_001126115:exon4:c.421C>T:p.R141C,TP53:NM_001126116:exon4:c.421C>T:p.R141C,TP53:NM_001126117:exon4:c.421C>T:p.R141C,TP53:NM_001276697:exon4:c.340C>T:p.R114C,TP53:NM_001276698:exon4:c.340C>T:p.R114C,TP53:NM_001276699:exon4:c.340C>T:p.R114C,TP53:NM_001126118:exon7:c.700C>T:p.R234C,TP53:NM_000546:exon8:c.817C>T:p.R273C,TP53:NM_001126112:exon8:c.817C>T:p.R273C,TP53:NM_001126113:exon8:c.817C>T:…	1.196e-05	5.443e-05	1.475e-05	8.679e-06	1.193e-05	0	0	0	5.443e-05	8.818e-06	4.631e-05	0	0	5.444e-05	7.459e-05	5.658e-05	.	0	.	0	0	3.183e-05	0	.	0	0	0	0	0	0	.	.	.	.	urinary_tract	5
17	7577121	7577121	G	T	exonic	TP53	-	nonsynonymous SNV	TP53:NM_001126115:exon4:c.421C>A:p.R141S,TP53:NM_001126116:exon4:c.421C>A:p.R141S,TP53:NM_001126117:exon4:c.421C>A:p.R141S,TP53:NM_001276697:exon4:c.340C>A:p.R114S,TP53:NM_001276698:exon4:c.340C>A:p.R114S,TP53:NM_001276699:exon4:c.340C>A:p.R114S,TP53:NM_001126118:exon7:c.700C>A:p.R234S,TP53:NM_000546:exon8:c.817C>A:p.R273S,TP53:NM_001126112:exon8:c.817C>A:p.R273S,TP53:NM_001126113:exon8:c.817C>A:…	0	.	0	0	7.952e-06	0	0	0	0	0	0	0	0	.	.	.	.	-	-	-	-	-	-	-	-	-	-	-	-	-	-	-	-	-	urinary_tract	2
2	20647740	20647740	G	A	exonic	RHOB	-	nonsynonymous SNV	RHOB:NM_004040:exon1:c.514G>A:p.E172K	0	.	0	0	3.978e-06	0	0	0	0	0	0	0	0	.	.	.	.	-	-	-	-	-	-	-	-	-	-	-	-	-	-	-	-	-	urinary_tract	6
2	198265453	198265453	C	T	exonic	SF3B1	-	nonsynonymous SNV	SF3B1:NM_012433:exon18:c.2704G>A:p.E902K	-	-	-	-	-	-	-	-	-	-	-	-	-	-	-	-	-	-	-	-	-	-	-	-	-	-	-	-	-	-	-	-	-	-	urinary_tract	6
6	88299660	88299660	G	A	exonic	RARS2	-	nonsynonymous SNV	RARS2:NM_001350505:exon1:c.16C>T:p.R6C,RARS2:NM_020320:exon1:c.16C>T:p.R6C	2.809e-05	0.0002	3.7e-05	1.754e-05	6.362e-05	6.325e-05	0	2.893e-05	0.0002	1.777e-05	0	0	0	0.0002	0.0002	0.0002	0.0002	-	-	-	-	-	-	-	-	-	-	-	-	-	-	-	-	-	urinary_tract	6
17	7577127	7577127	C	T	exonic	TP53	-	nonsynonymous SNV	TP53:NM_001126115:exon4:c.415G>A:p.E139K,TP53:NM_001126116:exon4:c.415G>A:p.E139K,TP53:NM_001126117:exon4:c.415G>A:p.E139K,TP53:NM_001276697:exon4:c.334G>A:p.E112K,TP53:NM_001276698:exon4:c.334G>A:p.E112K,TP53:NM_001276699:exon4:c.334G>A:p.E112K,TP53:NM_001126118:exon7:c.694G>A:p.E232K,TP53:NM_000546:exon8:c.811G>A:p.E271K,TP53:NM_001126112:exon8:c.811G>A:p.E271K,TP53:NM_001126113:exon8:c.811G>A:…	-	-	-	-	-	-	-	-	-	-	-	-	-	-	-	-	-	-	-	-	-	-	-	-	-	-	-	-	-	-	-	-	-	-	urinary_tract	5
[truncated: 443 more rows]

## Sheet: synonymous_high_hits
gene	chr	pos	strand	impact	coding position	amino acid position	CDN hits in TCGA	CDN cancer types	coding context (15bp)	is CpG site
[truncated: 107 more rows]

## Sheet: Synonymous_high_hits.gnomad
Chr	Start	End	Ref	Alt	Func.refGene	Gene.refGene	GeneDetail.refGene	ExonicFunc.refGene	AAChange.refGene	AF	AF_popmax	AF_male	AF_female	AF_raw	AF_afr	AF_sas	AF_amr	AF_eas	AF_nfe	AF_fin	AF_asj	AF_oth	non_topmed_AF_popmax	non_neuro_AF_popmax	non_cancer_AF_popmax	controls_AF_popmax	AF	AF_popmax	AF_male	AF_female	AF_raw	AF_afr	AF_sas	AF_amr	AF_eas	AF_nfe	AF_fin	AF_asj	AF_oth	non_topmed_AF_popmax	non_neuro_AF_popmax	non_cancer_AF_popmax	controls_AF_popmax	Otherinfo1	Otherinfo2
[truncated: 155 more rows]
